# Supplementary material for: NuRD subunit CHD4 regulates super-enhancer accessibility in rhabdomyosarcoma and represents a general tumor dependency
Source: eLife journal article supplement (doi:10.7554/elife.54993), 2020-08-03
Supplement: supp [file elife-54993-supp-v1.zip]

Figure 3 - figure supplement 2

A

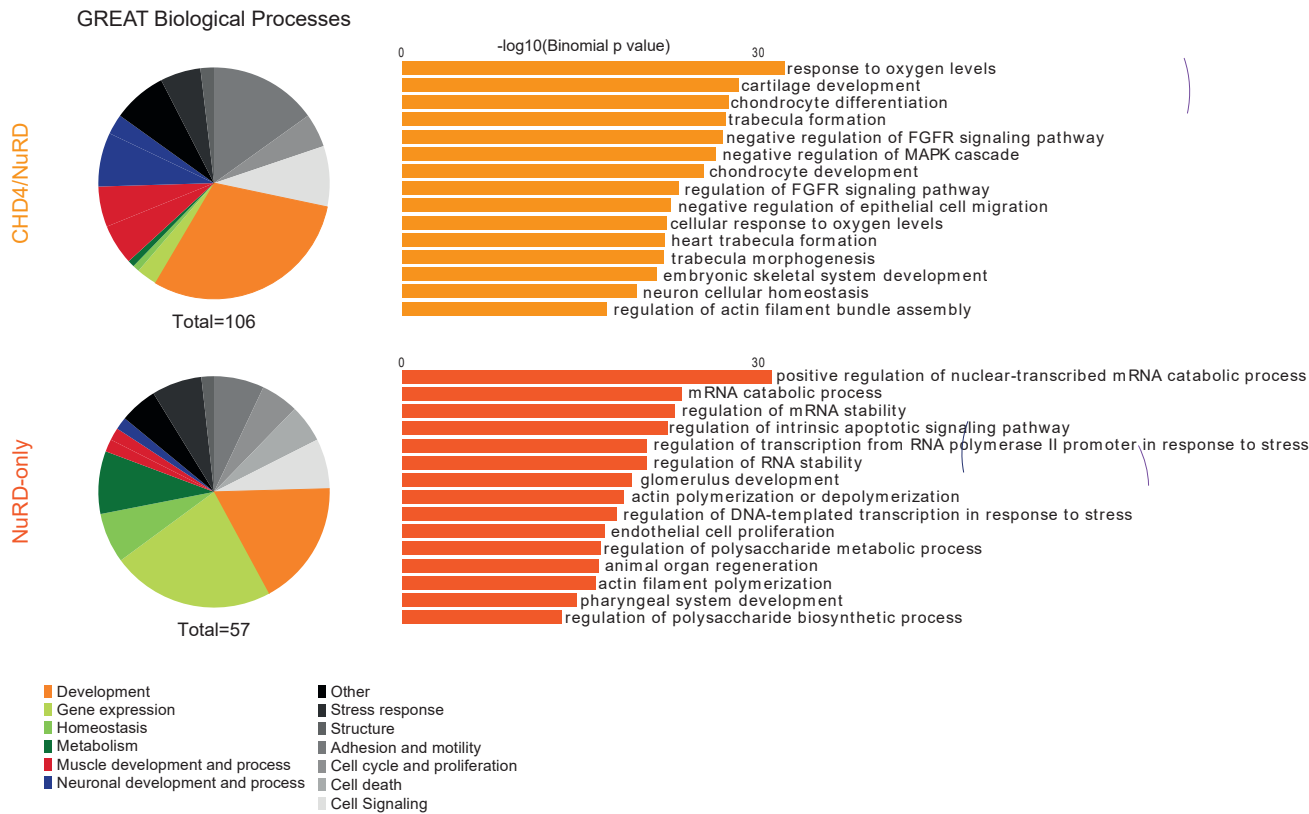

B

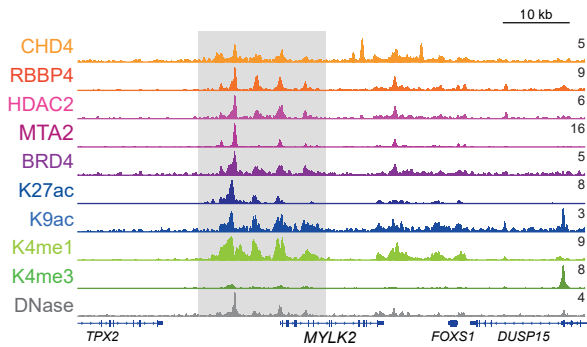

**Figure 3 - figure supplement 2** The NuRD complex regulates distinct processes according with the presence or absence of CHD4. **A** GREAT gene ontology analysis of the CHD4/NuRD and NuRD-only locations. Displayed are pie charts depicting the categories of biological processes (left) and the top 15 biological processes (right) found enriched for each set of locations. **B** Example of gene track where CHD4/NuRD is present at an enhancer in the vicinity of a gene (*MYLK2*) involved in the category muscle development.
