# Supplementary material for: NuRD subunit CHD4 regulates super-enhancer accessibility in rhabdomyosarcoma and represents a general tumor dependency
Source: eLife journal article supplement (doi:10.7554/elife.54993), 2020-08-03
Supplement: supp [file elife-54993-supp-v1.zip]

Figure 3 - figure supplement 1

A

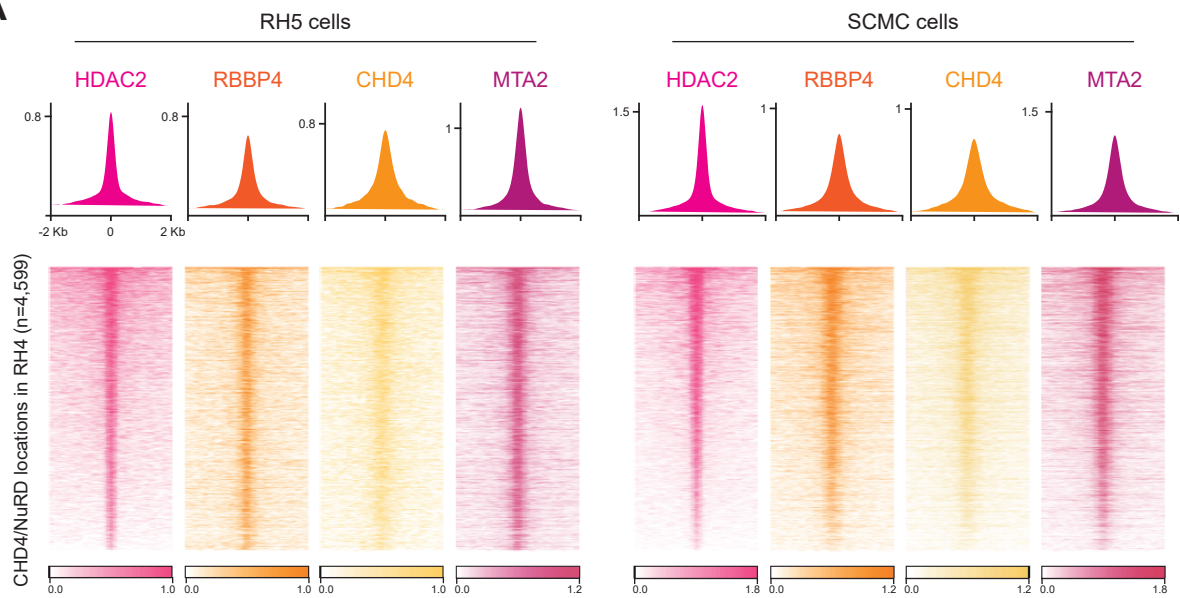

B

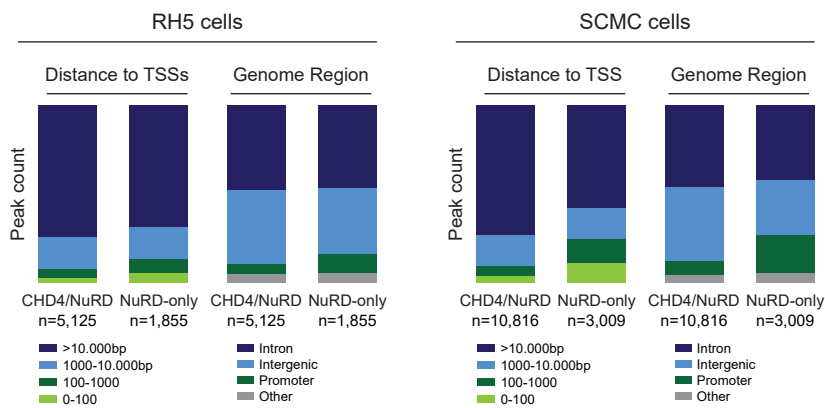

**Figure 3 - figure supplement 1** The NuRD complex localizes to similar enhancer locations in RH5 and SCMC cells as in RH4. **A** Density plots and heatmaps depicting the ChIP-seq signal of the indicated NuRD subunits at CHD4/NuRD locations defined in RH4 cells (n=4,599). The rows show 8kb regions and color shading corresponds to ChIP-seq read counts. **B** Distribution of peak counts for CHD4/NuRD and NuRD-only locations in RH5 and SCMC cells according to their distance to transcription start sites (TSSs) and genome functional region.
