# Supplementary material for: NuRD subunit CHD4 regulates super-enhancer accessibility in rhabdomyosarcoma and represents a general tumor dependency
Source: eLife journal article supplement (doi:10.7554/elife.54993), 2020-08-03
Supplement: supp [file elife-54993-supp-v1.zip]

Figure 4 - figure supplement 2

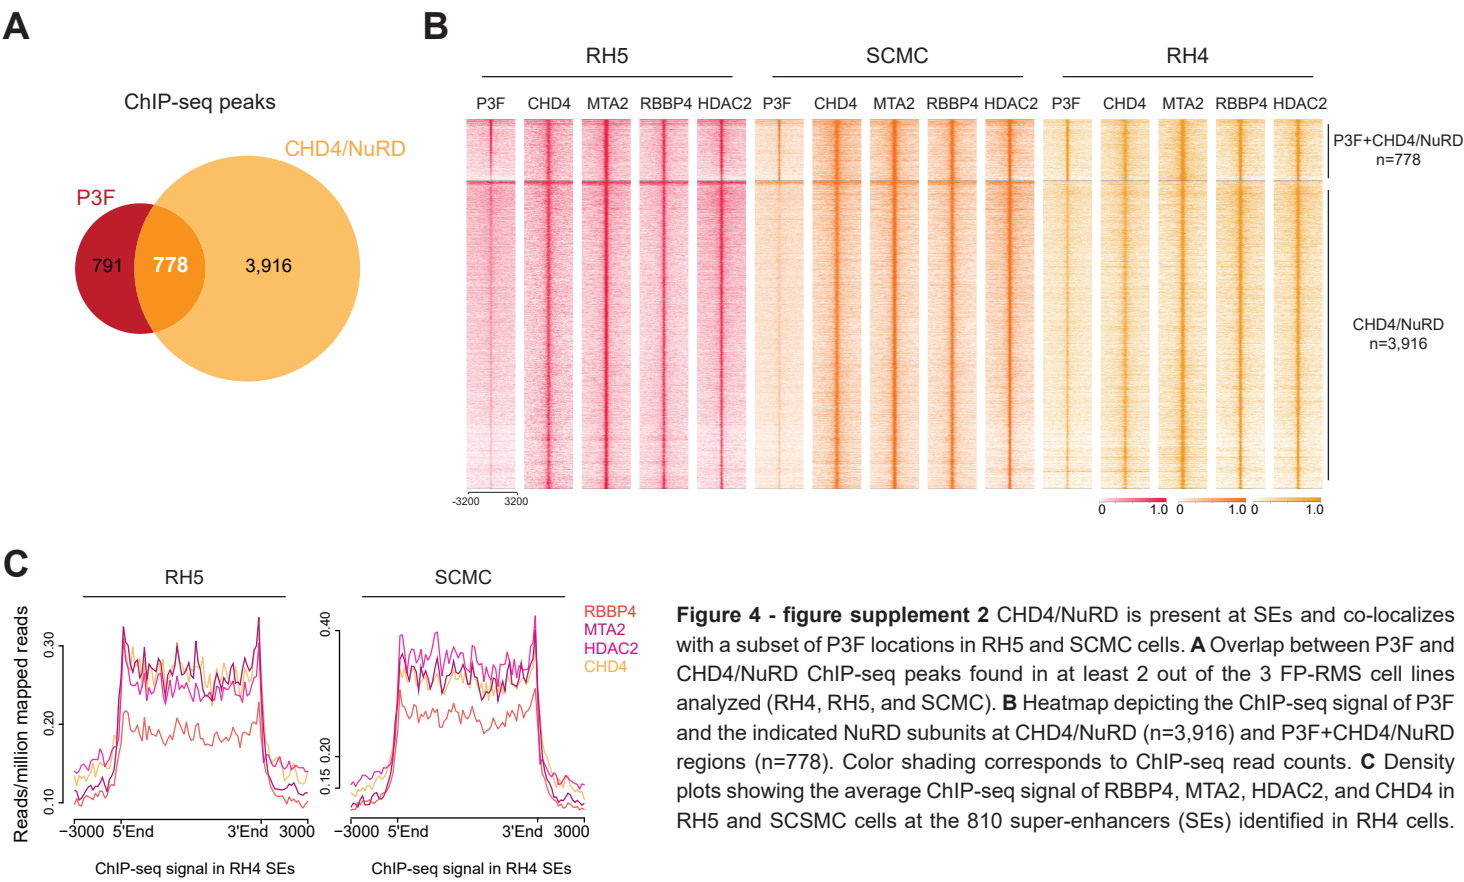

**Figure 4 - figure supplement 2** CHD4/NuRD is present at SEs and co-localizes with a subset of P3F locations in RH5 and SCMC cells. **A** Overlap between P3F and CHD4/NuRD ChIP-seq peaks found in at least 2 out of the 3 FP-RMS cell lines analyzed (RH4, RH5, and SCMC). **B** Heatmap depicting the ChIP-seq signal of P3F and the indicated NuRD subunits at CHD4/NuRD (n=3,916) and P3F+CHD4/NuRD regions (n=778). Color shading corresponds to ChIP-seq read counts. **C** Density plots showing the average ChIP-seq signal of RBBP4, MTA2, HDAC2, and CHD4 in RH5 and SCMC cells at the 810 super-enhancers (SEs) identified in RH4 cells.
