# Supplementary material for: NuRD subunit CHD4 regulates super-enhancer accessibility in rhabdomyosarcoma and represents a general tumor dependency
Source: eLife journal article supplement (doi:10.7554/elife.54993), 2020-08-03
Supplement: supp [file elife-54993-supp-v1.zip]

Figure 6 - figure supplement 1

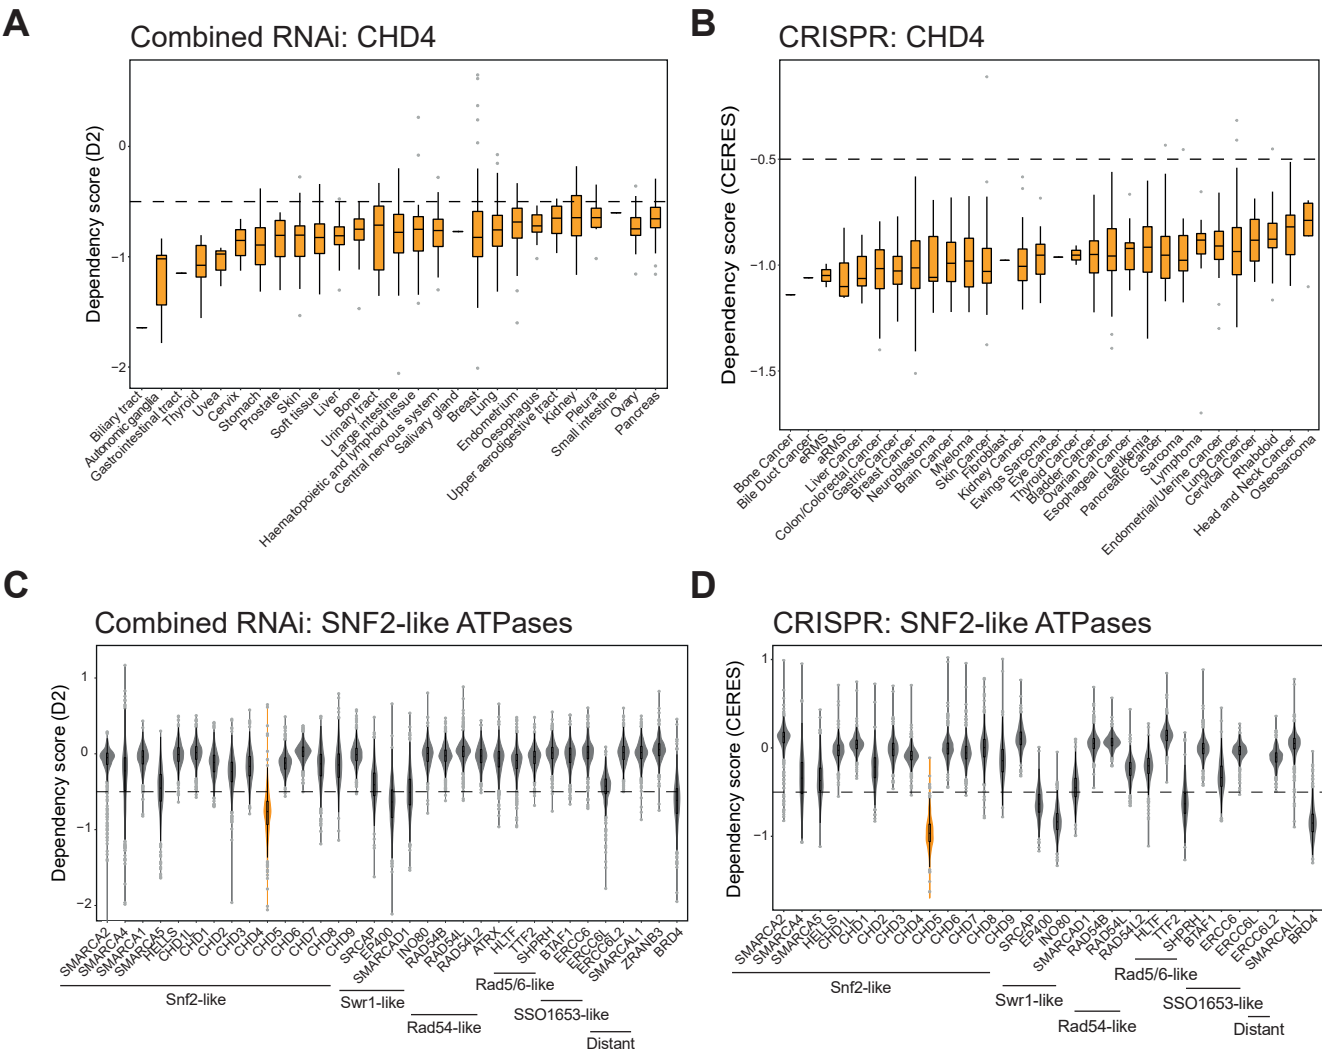

**Figure 6 - figure supplement 1** CHD4 depletion affects the viability of a variety of tumor types. **A and B** Boxplots demonstrate the sensitivity, displayed as dependency scores D2 or CERES, of the indicated tumor types to CHD4 knockdown (Combined RNAi) or knockout (CRISPR). **C and D** Violin plots show the cancer dependency scores, calculated by D2 or CERES, for the indicated SNF2-like family members of chromatin remodelers and BRD4. CHD4 is displayed in orange.
