# Supplementary material for: NuRD subunit CHD4 regulates super-enhancer accessibility in rhabdomyosarcoma and represents a general tumor dependency
Source: eLife journal article supplement (doi:10.7554/elife.54993), 2020-08-03
Supplement: supp [file elife-54993-supp-v1.zip]

Figure 4 - figure supplement 1

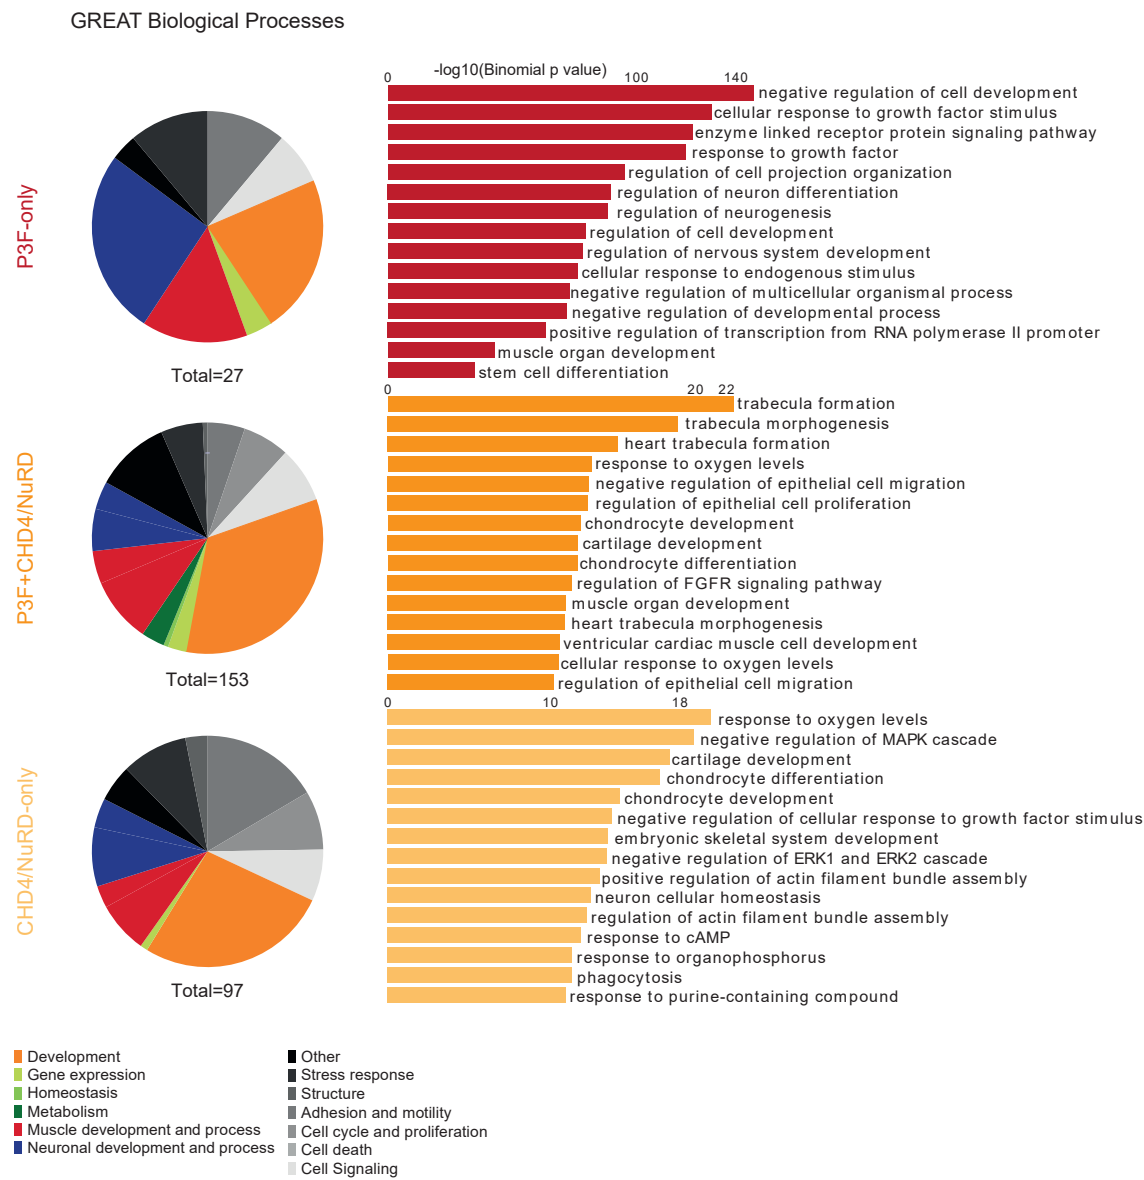

**Figure 4 - figure supplement 1** PAX3-FOXO1 regulates muscle-related processes with CHD4/NuRD. GREAT gene ontology analysis of the P3F-only, P3F+CHD4/NuRD, and CHD4/NuRD-only regions defined in RH4 cells. Displayed are pie charts depicting the categories of biological processes (left) and the top 15 biological processes (right) found enriched for each set of regions.
