# Supplementary material for: NuRD subunit CHD4 regulates super-enhancer accessibility in rhabdomyosarcoma and represents a general tumor dependency
Source: eLife journal article supplement (doi:10.7554/elife.54993), 2020-08-03
Supplement: supp [file elife-54993-supp-v1.zip]

Figure 1 - figure supplement 2

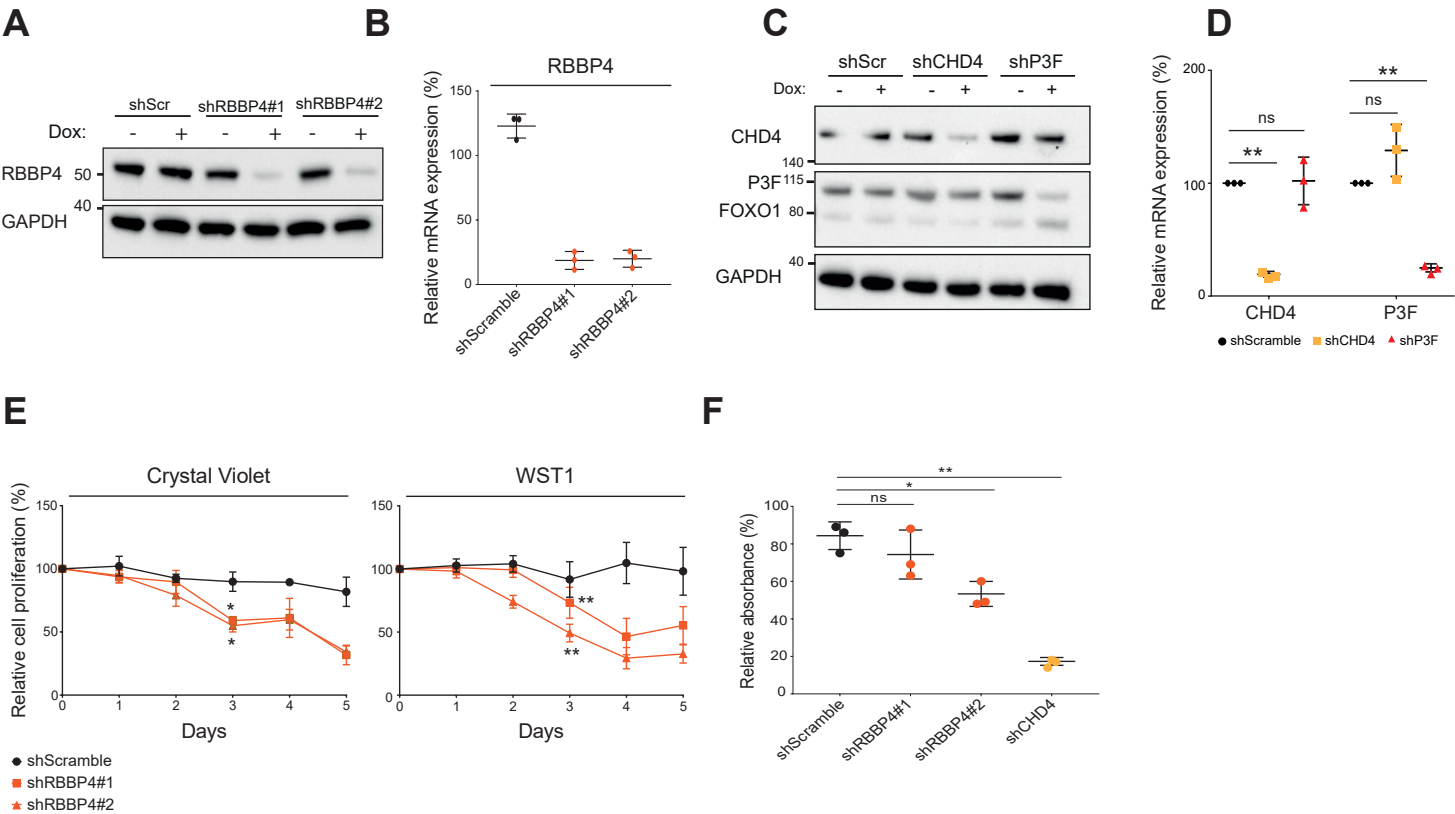

**Figure 1 - figure supplement 2** RBBP4 silencing reduces FP-RMS cell proliferation. **A** Immunoblot confirms the knockdown of RBBP4 by two shRNAs after 72hrs of shRNA expression induction by doxycycline (Dox). RH4 cells expressing a scramble shRNA (shScr) served as negative control and GAPDH as loading control. **B** RBBP4 expression levels (relative to GAPDH) quantified by qPCR in the same cells described in **(A)**. Data was normalized to uninduced cells and is represented as mean  $\pm$  SD (n=3). **C** Immunoblot confirms silencing of CHD4 and P3F after 48hrs of shRNA expression induction by doxycycline (Dox) in RH4 cells. GAPDH was used as a loading control and a scramble shRNA (shScr) served as negative control. **D** mRNA expression levels (relative to GAPDH), of the samples described in **(C)**, quantified by qPCR and normalized to uninduced cells. Data is represented as mean  $\pm$  SD (n=3, \* p<0.1, \*\*p<0.01; \*\*\*p<0.001, ratio paired t test). **E** RH4 cell proliferation measured by crystal violet and WST1 assay at the indicated time points after silencing of RBBP4. Data was normalized to uninduced cells and is represented as mean  $\pm$  SD (n=3; \* p<0.1, \*\*p<0.01, \*\*\*p<0.001, ratio paired t test). **F** Cell proliferation measured by BrdU incorporation after 72hrs of RBBP4 or CHD4 knockdown. Data is represented as percentage of absorbance at 450nm normalized to uninduced control (n=3; \* p<0.1, \*\*p<0.01, \*\*\*p<0.001, ratio paired t test).
