# Supplementary material for: NuRD subunit CHD4 regulates super-enhancer accessibility in rhabdomyosarcoma and represents a general tumor dependency
Source: eLife journal article supplement (doi:10.7554/elife.54993), 2020-08-03
Supplement: supp [file elife-54993-supp-v1.zip]

Figure 2 - figure supplement 1

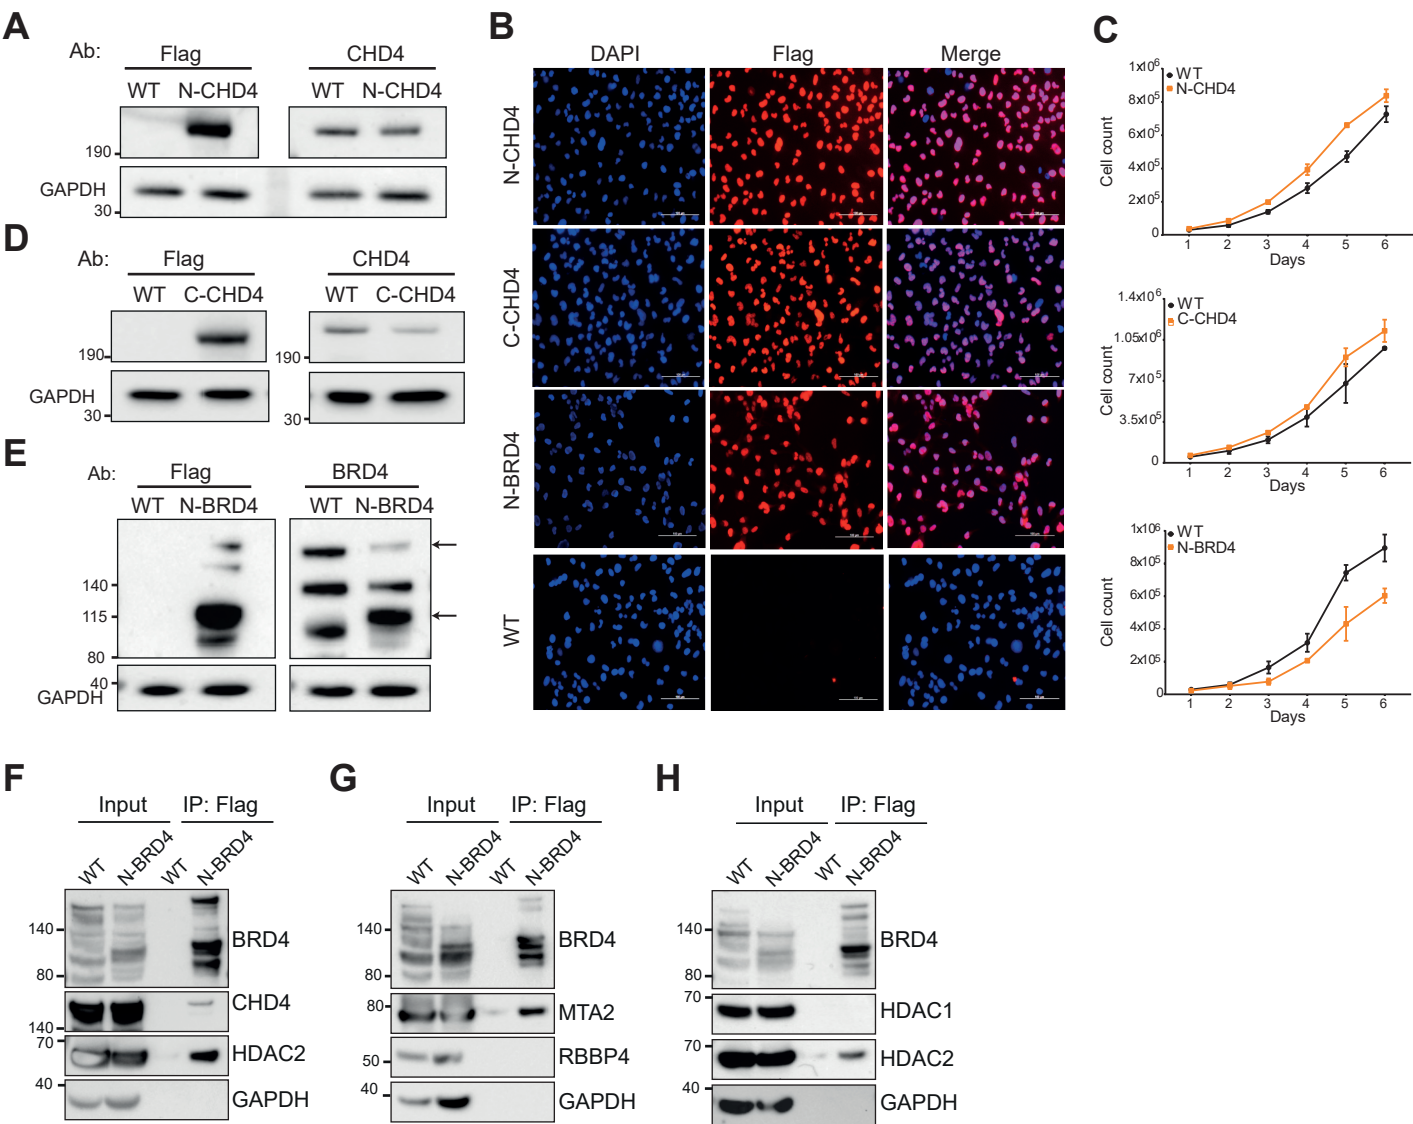

**Figure 2 - figure supplement 1** CRISPR/Cas9-mediated repair efficiently inserts a 3xFlag tag to endogenous *CHD4* and *BRD4*. **A, D and E** Immunoblot confirms the insertion of the 3xFlag tag at endogenous *CHD4* (both N- and C-terminus) and *BRD4* (N-terminus) in RH4 cells (Ab=antibody). GAPDH was used as a loading control and wildtype RH4 cells (WT) served as negative control. Arrows indicate BRD4 bands. **B** Representative immunofluorescence images show the expected nuclear localization of Flag tagged CHD4 and BRD4 in over 95% of the cells. DAPI was used to visualize the nucleus. Scale bar - 100µm. **C** Cell counts over six days of RH4 WT and N-CHD4 (top), C-CHD4 (middle), or N-BRD4 (bottom) cells. Data is represented as mean ±SD (n=3). **F-H** Western blots of Flag immunoprecipitation assays (IP).
