# Supplementary material for: NuRD subunit CHD4 regulates super-enhancer accessibility in rhabdomyosarcoma and represents a general tumor dependency
Source: eLife journal article supplement (doi:10.7554/elife.54993), 2020-08-03
Supplement: supp [file elife-54993-supp-v1.zip]

Archive with 17 entries (17 files):
- elife_poa_e54993_Transparent_Reporting_File.docx
- elife_poa_e54993_Figure_1_figure_supplement_1.pdf
- elife_poa_e54993_Figure_1_figure_supplement_2.pdf
- elife_poa_e54993_Figure_2_figure_supplement_1.pdf
- elife_poa_e54993_Figure_3_figure_supplement_1.pdf
- elife_poa_e54993_Figure_3_figure_supplement_2.pdf
- elife_poa_e54993_Figure_4_figure_supplement_1.pdf
- elife_poa_e54993_Figure_4_figure_supplement_2.pdf
- elife_poa_e54993_Figure_4_figure_supplement_3.pdf
- elife_poa_e54993_Figure_5_figure_supplement_1.pdf
- elife_poa_e54993_Figure_6_figure_supplement_1.pdf
- elife_poa_e54993_Supplementary_file_1.docx
- elife_poa_e54993_Figure_1_Source_data_1.xlsx
- elife_poa_e54993_Figure_2_Source_data_1.xlsx
- elife_poa_e54993_Figure_3_Source_data_1.xlsx
- elife_poa_e54993_Figure_4_Source_data_1.xlsx
- elife_poa_e54993_Figure_5_Source_data_1.xlsx
