# Supplementary material for: NuRD subunit CHD4 regulates super-enhancer accessibility in rhabdomyosarcoma and represents a general tumor dependency
Source: eLife journal article supplement (doi:10.7554/elife.54993), 2020-08-03
Supplement: supp [file elife-54993-supp-v1.zip › elife_poa_e54993_Figure_1_Source_data_1.xlsx]

## Sheet: Fig.1B
NuRD-centered CRISPR/Cas9 screen
Displayed is the ratio between KO and AAVS1 control population at day 12 normalized to day 2.
	CHD3			Average	CHD4			Average	MBD2			Average	MBD3			Average	HDAC1			Average	HDAC2			Average	MTA1			Average	MTA2			Average	MTA3			Average	RBBP4			Average	RBBP7			Average	GATAD2A			Average	GATAD2B
sg#1	102	105	110	105.667	84	66	53	67.6667	140	115	142	132.333	126	98	105	109.667	61	73	65	66.3333	97	96	94	95.6667	99	99	101	99.6667	92	97	112	100.333	73	95	96	88	66	68	64	66	91	72	79	80.6667	63	60	67	63.3333	112
sg#2	88	92	95	91.6667	196	99	93	129.333	124	86	94	101.333	117	90	108	105	81	88	89	86	93	79	75	82.3333	104	107	116	109	102	105	125	110.667	111	115	113	113	92	61	80	77.6667	110	96	89	98.3333	66	78	81	75	84
sg#3	114	132	123	123	47	33	46	42	79	76	99	84.6667	94	80	87	87	101	71	74	82	89	89	89	89	118	119	135	124	83	80	91	84.6667	91	89	95	91.6667	58	53	117	76	94	79	73	82	88	85	90	87.6667	89
sg#4	113	80	101	98	52	29	33	38	120	82	104	102	145	125	129	133	69	71	69	69.6667	105	79	87	90.3333	97	107	115	106.333	102	77	108	95.6667	94	102	106	100.667	24	30	47	33.6667	125	62	49	78.6667	54	59	61	58	68
sg#5	92	71	92	85	56	34	63	51	159	101	120	126.667	112	99	110	107	66	77	69	70.6667	88	83	86	85.6667	110	104	114	109.333	102	91	100	97.6667	90	88	96	91.3333	63	70	63	65.3333	91	85	75	83.6667	57	54	62	57.6667	82
			Median	98			Median	51			Median	102			Median	107			Median	70.6667			Median	89			Median	109			Median	97.6667			Median	91.6667			Median	66			Median	82			Median	63.3333
[truncated: 7 more columns]

## Sheet: Fig.1D
Percentage of dead cells measured by 7-AAD staining
	- Dox			+ Dox
shScramble	22.3	33.1	30.7	15.8	27.5	22.7
shRBBP4#1	14.3	32	28.8	29.3	36.5	28.6
shRBBP4#2	22.9	28.9	32.6	30.4	33.3	36.1
shCHD4#1	25.1	33.9	36.8	86.3	80.7	72.9
shP3F	22.6	30.1	24.3	69	70	60.5
	shScramble +Dox	shRBBP4#1 + Dox	shRBBP4#2 + Dox	shCHD4 +Dox	shP3F + Dox
	vs.	vs.	vs.	vs.	vs.
	shScramble -Dox	shRBBP4#1 - Dox	shRBBP4#2 - Dox	shCHD4 - Dox	shP3F - Dox
Ratio paired t test
P value	0.0282	0.3335	0.0857	0.0291	0.0072
P value summary	*	ns	ns	*	**
Significantly different (P < 0.05)?	Yes	No	No	Yes	Yes
One- or two-tailed P value?	Two-tailed	Two-tailed	Two-tailed	Two-tailed	Two-tailed
t, df	t=5.827 df=2	t=1.264 df=2	t=3.192 df=2	t=5.729 df=2	t=11.71 df=2
Number of pairs	3	3	3	3	3

## Sheet: Fig.1E
P3F target genes - mRNA quantification
	CDH3			ALK			CNR1			ASS1			PIPOX			TFAP2B
shScramble	100	100	100	100	100	100	100	100	100	100	100	100	100	100	100	100	100	100
shRBBP4 #1	42	97	50	78	120	96	200	239	193	90	96	141	98	163	131	77	93	103
shRBBP4#2	74	85	58	101	97	70	184	238	166	86	60	97	93	107	95	121	98	126
		shRBBP4 #1	shRBBP4#2		shRBBP4 #1	shRBBP4#2		shRBBP4 #1	shRBBP4#2		shRBBP4 #1	shRBBP4#2		shRBBP4 #1	shRBBP4#2		shRBBP4 #1	shRBBP4#2
		vs.	vs.		vs.	vs.		vs.	vs.		vs.	vs.		vs.	vs.		vs.	vs.
		shScramble	shScramble		shScramble	shScramble		shScramble	shScramble		shScramble	shScramble		shScramble	shScramble		shScramble	shScramble
	Ratio paired t test
	P value	0.173	0.095		0.8014	0.3919		0.0079	0.0253		0.6849	0.251		0.2368	0.7095		0.356	0.2279
	P value summary	ns	ns		ns	ns		**	*		ns	ns		ns	ns		ns	ns
	Significantly different (P < 0.05)?	No	No		No	No		Yes	Yes		No	No		No	No		No	No
	One- or two-tailed P value?	Two-tailed	Two-tailed		Two-tailed	Two-tailed		Two-tailed	Two-tailed		Two-tailed	Two-tailed		Two-tailed	Two-tailed		Two-tailed	Two-tailed
	t, df	t=2.080, df=2	t=3.009, df=2		t=0.2866, df=2	t=1.083, df=2		t=11.20, df=2	t=6.172, df=2		t=0.4696, df=2	t=1.599, df=2		t=1.670, df=2	t=0.4294, df=2		t=1.191, df=2	t=1.718, df=2
	Number of pairs	3	3		3	3		3	3		3	3		3	3		3	3

## Sheet: Fig.1F
P3F target genes - mRNA quantification
	CDH3			ALK			CNR1			ASS1			PIPOX			TFAP2B
shScramble	100	100	100	100	100	100	100	100	100	100	100	100	100	100	100	100	100	100
shPAX3-FOXO1	35	49	35	37	60	58	4	7	5	36	35	53	16	23	22	49	66	88
		shPAX3-FOXO1		shPAX3-FOXO1			shPAX3-FOXO1			shPAX3-FOXO1			shPAX3-FOXO1			shPAX3-FOXO1
		vs.		vs.			vs.			vs.			vs.			vs.
		shScramble		shScramble			shScramble			shScramble			shScramble			shScramble
	Ratio paired t test
	P value	0.014		0.0483			0.003			0.0213			0.005			0.1315
	P value summary	*		*			**			*			**			ns
	Significantly different (P < 0.05)?	Yes		Yes			Yes			Yes			Yes			No
	One- or two-tailed P value?	Two-tailed		Two-tailed			Two-tailed			Two-tailed			Two-tailed			Two-tailed
	t, df	t=8.360, df=2		t=4.386, df=2			t=18.19, df=2			t=6.739, df=2			t=14.05, df=2			t=2.478, df=2
	Number of pairs	3		3			3			3			3			3

## Sheet: Fig.1G
P3F target genes - mRNA quantification
	CDH3			ALK			CNR1			ASS1			PIPOX			TFAP2B
shScramble	100	100	100	100	100	100	100	100	100	100	100	100	100	100	100	100	100	100
shCHD4#1	53	57	39	39	44	32	74	114	47	103	75	112	78	153	144	134	149	190
		shCHD4#1		shCHD4#1			shCHD4#1			shCHD4#1			shCHD4#1			shCHD4#1
		vs.		vs.			vs.			vs.			vs.			vs.
		shScramble		shScramble			shScramble			shScramble			shScramble			shScramble
	Ratio paired t test
	P value	0.0256		0.0091			0.3513			0.7309			0.4899			0.0501
	P value summary	*		**			ns			ns			ns			ns
	Significantly different (P < 0.05)?	Yes		Yes			No			No			No			No
	One- or two-tailed P value?	Two-tailed		Two-tailed			Two-tailed			Two-tailed			Two-tailed			Two-tailed
	t, df	t=6.130, df=2		t=10.42, df=2			t=1.205, df=2			t=0.3952, df=2			t=0.8387, df=2			t=4.300, df=2
	Number of pairs	3		3			3			3			3			3

## Sheet: Fig. 1 - fig. supp. 1F
NuRD-centered CRISPR/Cas9 double knockout (DKO) screen
Displayed is the ratio between DKO and AAVS1 control population at day 12 normalized to day 2.
	HDAC1/2			Average	GATAD2A/B			Average	MBD2/3			Average
sg#1 mix	44	46	87	59	65	78	59	67.3333	82	62	68	70.6667
sg#2 mix	69	60	91	73.3333	66	71	58	65	60	71	62	64.3333
sg#3 mix	65	59	53	59	69	65	78	70.6667	76	70	58	68
sg#4 mix	76	72	55	67.6667	48	48	45	47	54	56	49	53
sg#5 mix	46	43	75	54.6667	49	57	53	53	70	63	78	70.3333
			Median	59			Median	65			Median	68

## Sheet: Fig. 1 - fig. supp. 2B
RBBP4 knockdown validation - mRNA quantification
	RBBP4
shScramble	128.34	127.96	112.06
shRBBP4#1	11.54	19.02	25.37
shRBBP4#2	12.85	21.27	25.74

## Sheet: Fig. 1 - fig. supp. 2D
CHD4 and P3F knockdown validation - mRNA quantification
	CHD4			P3F
shScramble	100	100	100	100	100	100
shCHD4#1	22	19	17	131	151	105
shPAX3-FOXO1	80	122	104	21	28	26
		shPAX3-FOXO1	shCHD4#1		shPAX3-FOXO1	shCHD4#1
		vs.	vs.		vs.	vs.
		shScramble	shScramble		shScramble	shScramble
	Ratio paired t test
	P value	0.9714	0.002		0.0038	0.1477
	P value summary	ns	**		**	ns
	Significantly different (P < 0.05)?	No	Yes		Yes	No
	One- or two-tailed P value?	Two-tailed	Two-tailed		Two-tailed	Two-tailed
	t, df	t=0.04045, df=2	t=22.09, df=2		t=16.16, df=2	t=2.305, df=2
	Number of pairs	3	3		3	3

## Sheet: Fig. 1 - fig. supp. 2E
Crystal Violet											WST
Days	shScramble			shRBBP4#1			shRBBP4#2				Days	shScramble			shRBBP4#1			shRBBP4#2
0	100	100	100	100	100	100	100	100	100		0	100	100	100	100	100	100	100	100	100
1	102.879	109.598	94.0264	94.3721	98.1787	88.4508	94.2052	100.17	89.5624		1	108.755	99.6466	99.8344	101.967	104.029	97.3031	92.5477	103.327	98.9542
2	89.9413	96.1774	91.4692	85.6213	100.112	83.3057	75.4832	88.9478	72.6376		2	96.8769	105.689	109.636	95.1537	106.041	96.6587	70.489	79.7913	71.8665
3	81.7922	97.0912	90.5752	60.0376	61.581	55.5933	57.2422	58.2919	49.3137		3	78.9815	106.85	89.3528	63.0638	86.8914	69.9425	44.0789	57.2074	46.3697
4	91.3539	88.249	88.6058	57.4269	78.2011	47.8403	57.8373	68.7216	52.7478		4	118.002	86.4934	109.736	46.6095	31.8535	60.817	28.7031	21.2775	38.0881
5	73.1856	77.2423	95.0255	23.6684	32.6873	39.0053	34.3069	29.3586	38.8471		5	79.4574	117.274	97.8982	38.6244	67.2646	60.0046	29.515	40.9179	27.5387
		shRBBP4#1	shRBBP4#2										shRBBP4#1	shRBBP4#2
		vs.	vs.										vs.	vs.
		shScramble	shScramble										shScramble	shScramble
	Ratio paired t test											Ratio paired t test
	P value	0.0169	0.0214									P value	0.0024	0.0011
	P value summary	*	*									P value summary	**	**
	Significantly different (P < 0.05)?	Yes	Yes									Significantly different (P < 0.05)?	Yes	Yes
	One- or two-tailed P value?	Two-tailed	Two-tailed									One- or two-tailed P value?	Two-tailed	Two-tailed
	t, df	t=7.593, df=2	t=6.729, df=2									t, df	t=20.47, df=2	t=29.50, df=2
	Number of pairs	3	3									Number of pairs	3	3

## Sheet: Fig. 1 - fig. supp. 2F
BRDU assay
shScramble	76	90	87
shRBBP4#1	64	89	70
shRBBP4#2	50	61	49
shCHD4	19	15	18
	shRBBP4#1	shRBBP4#2	shCHD4
	vs.	vs.	vs.
	shScramble	shScramble	shScramble
Ratio paired t test
P value	0.1664	0.0152	0.0054
P value summary	ns	*	**
Significantly different (P < 0.05)?	No	Yes	Yes
One- or two-tailed P value?	Two-tailed	Two-tailed	Two-tailed
t, df	t=2.134 df=2	t=8.024 df=2	t=13.53 df=2
Number of pairs	3	3	3
