# Supplementary material for: NuRD subunit CHD4 regulates super-enhancer accessibility in rhabdomyosarcoma and represents a general tumor dependency
Source: eLife journal article supplement (doi:10.7554/elife.54993), 2020-08-03
Supplement: supp [file elife-54993-supp-v1.zip › elife_poa_e54993_Figure_2_Source_data_1.xlsx]

## Sheet: Fig.2B
CHD4 candidate interactors
				N-terminus pull-down			C-terminus pull-down
	Gene name	Protein name	Protein ID	Fold change A	Saint Probability Score	Interactor strength	Fold change A	Saint Probability Score	Interactor strength	Comments	BioGRID 3.5 interaction Database Reference	PubMed Reference
Chromatin remodeling complexes	NuRD complex
	CDK2AP1	Cyclin-dependent kinase 2-associated protein 1	O14519	3.46	1	medium	4.59	1	high		Hein MY (2015), Hoffmeister H (2017)	26496610, 28977666
	CHD3	Chromodomain-helicase-DNA-binding protein 3	Q12873	5.56	1	high	6.66	1	high		Havugimana PC (2012), Xue Y (1998)	9885572, 22939629
	CHD4	Chromodomain-helicase-DNA-binding protein 4	Q14839	3.88	1	medium	4.43	1	high
	CHD5	Chromodomain-helicase-DNA-binding protein 5	Q8TDI0	4.05	1	high	4.37	1	high		Quan J (2014), Rahman S (2011)	21555454, 25247294
	GATAD2A	Transcriptional repressor p66-alpha	Q86YP4	3.35	1	medium	4.01	1	high		Havugimana PC (2012), Hoffmeister H (2017), Huttlin EL (2017), Rahman S (2011)	21555454, 22939629, 28514442, 28977666
	GATAD2B	Transcriptional repressor p66-beta	Q8WXI9	3.45	1	medium	4.39	1	high		Hoffmeister H (2017), Huttlin EL (2015), Huttlin EL (2017), Rahman S (2011)	21555454, 26186194, 28514442, 28977666
	HDAC1	Histone deacetylase 1	Q13547	6	1	high	6.87	1	high		Bantscheff M (2011), Cui S (2011), Grozinger CM (1999), Havugimana PC (2012), Hein MY (2015), Hoffmeister H (2017), Humphrey GW (2001), Huttlin EL (2017), Joshi P (2013), Kwintkiewicz J (2011), Polo SE (2010), Quan J (2014), Terhune SS (2010), Tong JK (1998), Wan C (2015), Weiss K (2016), Xue Y (1998), Yao YL (2003), Zhang Y (1998)	9790534, 9804427, 9885572, 10220385, 11102443, 12920132, 20585571, 20693977, 21258344, 21670149, 22075476, 22939629, 23752268, 25247294, 26344197, 26496610, 27616479, 28514442, 28977666
	HDAC2	Histone deacetylase 2	Q92769	6.27	1	high	7.03	1	high		Bantscheff M (2011), Cui S (2011), Hakimi MA (2003), Havugimana PC (2012), Hoffmeister H (2017), Joshi P (2013), O'Neill DW (2000), Schmidt DR (1999), Tong JK (1998), Wan C (2015), Xue Y (1998), Zhang Y (1998)	9790534, 9804427, 9885572, 10545197, 11003653, 12493763, 21258344, 21670149, 22939629, 23752268, 26344197, 28977666
	MBD2	Methyl-CpG-binding domain protein 2	Q9UBB5	11.49	1	high	14.36	1	high		Hein MY (2015), Hoffmeister H (2017)	26496610, 28977666
	MBD3	Methyl-CpG-binding domain protein 3	O95983	7	1	high	7.23	1	high		Cui S (2011), Havugimana PC (2012), Hoffmeister H (2017), Quan J (2014), Sakai H (2002)	12354758, 21670149, 22939629, 25247294, 28977666
	MTA1	Metastasis-associated protein MTA1	Q13330	4.61	1	high	5.75	1	high		Chudnovsky Y (2014), Cui S (2011), Hein MY (2015), Hoffmeister H (2017), Wan C (2015), Xue Y (1998), Yao YL (2003)	9885572, 12920132, 21670149, 24440720, 26344197, 26496610, 28977666
	MTA2	Metastasis-associated protein MTA2	O94776	4.64	1	high	4.62	1	high		Cui S (2011), Havugimana PC (2012), Hein MY (2015), Hoffmeister H (2017), Quan J (2014), Wan C (2015), Wang Y (2009), Yao YL (2003), Zhang Y (1998)	9790534, 12920132, 19703393, 21670149, 22939629, 25247294, 26344197, 26496610, 28977666
	MTA3	Metastasis-associated protein MTA3	Q9BTC8	5.04	1	high	4.74	1	high		Bantscheff M (2011), Hoffmeister H (2017), Kwintkiewicz J (2011), Wan C (2015)	21258344, 22075476, 26344197, 28977666
	SWI/SNF Complex - BAF
	BCL11A	B-cell lymphoma/leukemia 11A	Q9H165	3.03	1	medium					Cismasiu VB (2005), Hoffmeister H (2017)	16091750, 28977666
	BCL11B	B-cell lymphoma/leukemia 11B	Q9C0K0	6.04	1	high					Cismasiu VB (2005), Hoffmeister H (2017)	16091750, 28977666
	SMARCA2	Probable global transcription activator SNF2L2	P51531	3.92	0.99	medium	3.93	0.94	medium
	SMARCA4	Transcription activator BRG1	P51532	4.05	0.99	high	5.13	0.96	medium		Hoffmeister H (2017), Mahajan MC (2005), O'Neill DW (2000), Shimono Y (2003)	11003653, 14530259, 16217013, 28977666
	SMARCC1	SWI/SNF complex subunit SMARCC1	Q92922				2.68	0.9	low		Havugimana PC (2012), Hoffmeister H (2017), Mahajan MC (2005), O'Neill DW (2000)	11003653, 16217013, 22939629, 28977666
	SWI/SNF Complex - PBAF
	PBRM1	Protein polybromo-1	Q86U86	3.24	0.88	low	2.92	0.69	low
	WICH complex
	BAZ1B	Tyrosine-protein kinase BAZ1B	Q9UIG0	7.98	1	high	6.4	1	high		Hoffmeister H (2017)	28977666
	SMARCA5	SWI/SNF-related matrix-associated actin-dependent regulator of chromatin subfamily A member 5	O60264	24.13	1	high	19.34	1	high	Also part of RSF and NoRC complex.	Hoffmeister H (2017)	28977666
	NoRC complex
	BAZ2A	Bromodomain adjacent to zinc finger domain protein 2A	Q9UIF9	2.93	0.99	low
	RSF complex
	RSF1	Remodeling and spacing factor 1	Q96T23	23.23	1	high	21.46	1	high
	NURF complex
	SMARCA1	Probable global transcription activator SNF2L1	P28370	6.61	1	high	5.8	1	high	Also part of CERF complex
Chromatin modifying complexes	SIN3 complex
	SAP18	Histone deacetylase complex subunit SAP18	O00422	6.61	1	high	7.88	1	high		Hoffmeister H (2017)	28977666
Chromatin readers and modifiers	BRD2	Bromodomain-containing protein 2	P25440	7.93	1	high	9.53	1	high		Hoffmeister H (2017)	28977666
	BRD3	Bromodomain-containing protein 3	Q15059	7.42	1	high	5.89	1	high
	BRD4	Bromodomain-containing protein 4	O60885	3.63	1	medium					Rahman S (2011)	21555454
	EHMT1	Histone-lysine N-methyltransferase EHMT1	Q9H9B1	8.46	1	high	8.24	1	high
	EHMT2	Histone-lysine N-methyltransferase EHMT2	Q96KQ7	7.47	1	high	5.47	1	high		Xia L (2017)	28486105
	KMT2A	Histone-lysine N-methyltransferase 2A	Q03164	4.74	1	high	3.94	1	medium		Hoffmeister H (2017)	28977666
Transcription regulation	FACT complex
	SSRP1	FACT complex subunit SSRP1	Q08945	9.26	1	high	10.52	1	high		Hoffmeister H (2017)	28977666
	SUPT16H	FACT complex subunit SPT16	Q9Y5B9	13.46	1	high	14.45	1	high		Hoffmeister H (2017)	28977666
	TFIID complex
	TAF6	Transcription initiation factor TFIID subunit 6	P49848	5.7	1	high	4.29	0.94	medium
	Pre-initiation complex
	UBTF	Nucleolar transcription factor 1	P17480	6.08	1	high	4.17	0.94	medium		Hoffmeister H (2017), Rahman S (2011)	21555454, 28977666
	Zinc finger proteins
	WIZ	Protein Wiz	O95785	5.34	1	high	5.52	1	high
	ZMYM2	Zinc finger MYM-type protein 2	Q9UBW7	8.28	1	high	5.73	1	high
	ZMYM3	Zinc finger MYM-type protein 3	Q14202	13.69	1	high	18.42	1	high
	ZMYND8	Protein kinase C-binding protein 1	Q9ULU4	16.45	1	high	9.11	1	high		Adhikary S (2016), Hein MY (2015), Hoffmeister H (2017)	26496610, 26655721, 28977666
	ZNF462	Zinc finger protein 462	Q96JM2	3.14	0.99	medium
	ZNF512B	Zinc finger protein 512B	Q96KM6	6.55	1	high	10.29	1	high		Hoffmeister H (2017)	28977666
	ZNF592	Zinc finger protein 592	Q92610	8.01	1	high					Hoffmeister H (2017)	28977666
	ZNF644	Zinc finger protein 644	Q9H582	5.45	1	high	4.64	1	high
	ZNF687	Zinc finger protein 687	Q8N1G0	12.43	1	high	7.17	1	high
	Other transcriptional regulators
	DDX21	Nucleolar RNA helicase 2	Q9NR30	2.17	0.97	low					Hoffmeister H (2017)	28977666
	PHF14	PHD finger protein 14	O94880	11.15	1	high	7.51	1	high		Hoffmeister H (2017)	28977666
	PNN	Pinin	Q9H307	5.51	0.81	low					Hoffmeister H (2017)	28977666
	RAI1	Retinoic acid-induced protein 1	Q7Z5J4	8.92	1	high	6.76	1	high
	SNW1	SNW domain-containing protein 1	Q13573	4.96	1	high	3.25	0.84	low		Hoffmeister H (2017), Lleres D (2010)	20467437, 28977666
	SPEN	Msx2-interacting protein	Q96T58	3.52	0.67	low					Hoffmeister H (2017)	28977666
	TCOF1	Treacle protein	Q13428	6.68	1	high	9.43	1	high		Hoffmeister H (2017)	28977666
Histones	H1F0	Histone H1.0	P07305	2.87	0.81	low	5.4	0.92	medium		Hoffmeister H (2017)	28977666
	H2AFY	Core histone macro-H2A.1	O75367	7.68	1	high	5.6	1	high
	H2AFY2	Core histone macro-H2A.2	Q9P0M6	8.19	1	high	5.59	1	high
	H3F3C	Histone H3.3C	Q6NXT2	3.45	1	medium	2.77	1	low
	HIST1H2AG	Histone H2A type 1	P0C0S8	2.03	1	low
	HIST1H3A	Histone H3.1	P68431	2.22	1	low					Allen HF (2014), Mansfield RE (2011)	21278251, 24576085
	HIST1H4A	Histone H4	P62805	2.35	1	low					Hoffmeister H (2017)	28977666
	HIST2H2AB	Histone H2A type 2-B	Q8IUE6	2.8	0.99	low	2.45	0.89	low
	HIST2H2BC	Putative histone H2B type 2-C	Q6DN03	4.22	1	high	3.69	1	medium
Transcription factors	ADNP	Activity-dependent neuroprotector homeobox protein	Q9H2P0	5.45	1	high	7.09	1	high		Hoffmeister H (2017)	28977666
	ADNP2	Activity-dependent neuroprotector homeobox protein 2	Q6IQ32	12.26	1	high	16.27	1	high
	PROX1	Prospero homeobox protein 1	Q92786	10.6	1	high	8.24	1	high
	SALL3	Sal-like protein 3	Q9BXA9	4.19	1	high	3.76	1	medium
	TCF20	Transcription factor 20	Q9UGU0	12.42	1	high	10.58	1	high
	TSHZ3	Teashirt homolog 3	Q63HK5	8.14	1	high
	ZFHX3	Zinc finger homeobox protein 3	Q15911	26.84	1	high	29.67	1	high		Hoffmeister H (2017)	28977666
	ZFHX4	Zinc finger homeobox protein 4	Q86UP3	26.02	1	high	44.25	1	high		Chudnovsky Y (2014), Hoffmeister H (2017)	24440720, 28977666
Proteins involved in mitosis	CHAMP1	Chromosome alignment-maintaining phosphoprotein 1	Q96JM3	7.66	1	high	4	0.67	low
	MKI67	Proliferation marker protein Ki-67	P46013	9.69	1	high	11.07	1	high		Hoffmeister H (2017)	28977666
	NUMA1	Nuclear mitotic apparatus protein 1	Q14980	11.14	1	high	9.45	1	high		Hoffmeister H (2017)	28977666
	POGZ	Pogo transposable element with ZNF domain	Q7Z3K3	11.67	1	high	9.53	1	high
Enzymes	Topoisomerases
	TOP1	DNA topoisomerase 1	P11387	2.45	0.99	low	5.81	1	high		Hoffmeister H (2017)	28977666
	TOP1MT	DNA topoisomerase I, mitochondrial	Q969P6				5.22	0.96	medium
	TOP2A	DNA topoisomerase 2-alpha	P11388	17.06	1	high	17.28	1	high		Hoffmeister H (2017)	28977666
	TOP2B	DNA topoisomerase 2-beta	Q02880	14.93	1	high	10.11	0.99	high		Hoffmeister H (2017)	28977666
	E3 ubiquitin-protein ligase
	RBBP6	E3 ubiquitin-protein ligase RBBP6	Q7Z6E9	9.04	1	high	7.28	1	high
	TRIP12	E3 ubiquitin-protein ligase TRIP12	Q14669				3.57	0.88	low
Splicing	ACIN1	Apoptotic chromatin condensation inducer in the nucleus	Q9UKV3	4.82	0.99	high	5.84	0.98	medium		Hoffmeister H (2017)	28977666
	AQR	RNA helicase aquarius	O60306	8.16	1	high	4.45	0.89	low
	CRNKL1	Crooked neck-like protein 1	Q9BZJ0	7.56	1	high	5.59	0.98	medium
	CWC22	Pre-mRNA-splicing factor CWC22 homolog	Q9HCG8	7.65	1	high	4.68	0.65	low
	DHX8	ATP-dependent RNA helicase DHX8	Q14562	4.08	0.91	medium
	ISY1	Pre-mRNA-splicing factor ISY1 homolog	Q9ULR0	3.53	1	medium
	SRRM1	Serine/arginine repetitive matrix protein 1	Q8IYB3	4.26	0.68	low					Hoffmeister H (2017), McCracken S (2005)	16159877, 28977666
Other	CBX5	Chromobox protein homolog 5	P45973	3.79	1	medium					Hauri S (2016), Hoffmeister H (2017), Lechner MS (2005)	15882967, 27705803, 28977666
	CXCR3	C-X-C chemokine receptor type 3	P49682	4.98	1	high	3.83	0.99	medium
	DDX24	ATP-dependent RNA helicase DDX24	Q9GZR7	3.18	0.86	low	4.26	0.84	low	DEAD box protein	Hoffmeister H (2017)	28977666
	DDX50	ATP-dependent RNA helicase DDX50	Q9BQ39	2.49	1	low				DEAD box protein	Hoffmeister H (2017)	28977666
	DKC1	H/ACA ribonucleoprotein complex subunit 4	O60832	12.95	1	high	11.47	1	high		Hoffmeister H (2017)	28977666
	DPYSL5	Dihydropyrimidinase-related protein 5	Q9BPU6	4.98	1	high	3.83	0.99	medium
	FBL	rRNA 2'-O-methyltransferase fibrillarin	P22087	2.44	0.98	low	2.12	0.98	low		Hoffmeister H (2017)	28977666
	GPATCH8	G patch domain-containing protein 8	Q9UKJ3	5.29	1	high
	HDGFL2	Hepatoma-derived growth factor-related protein 2	Q7Z4V5	3.38	0.98	medium	3.34	0.88	low
	NOLC1	Nucleolar and coiled-body phosphoprotein 1	Q14978	17.58	1	high	19.67	1	high		Hoffmeister H (2017), Rahman S (2011)	21555454, 28977666
	NOP56	Nucleolar protein 56	O00567	5.53	1	high	4.81	0.98	medium		Hoffmeister H (2017)	28977666
	NOP58	Nucleolar protein 58	Q9Y2X3	5.4	0.98	medium	5.22	0.95	medium		Hoffmeister H (2017)	28977666
	RSL1D1	Ribosomal L1 domain-containing protein 1	O76021	5.1	0.99	high	3.48	0.85	low		Hoffmeister H (2017)	28977666
	SRRT	Serrate RNA effector molecule homolog	Q9BXP5	7.09	0.98	medium	6.45	0.88	low		Hoffmeister H (2017)	28977666
	TRAPPC8	Trafficking protein particle complex subunit 8	Q9Y2L5	3.75	1	medium
	ZC3H18	Zinc finger CCCH domain-containing protein 18	Q86VM9	15.34	1	high	16.16	1	high		Hoffmeister H (2017)	28977666
	ZCCHC8	Zinc finger CCHC domain-containing protein 8	Q6NZY4	4.44	0.84	low	3.62	0.65	low	Part of the NEXT complex	Hoffmeister H (2017)	28977666
	ZMYM4	Zinc finger MYM-type protein 4	Q5VZL5	5.38	1	high					Hauri S (2016)	27705803
