# Supplementary material for: NuRD subunit CHD4 regulates super-enhancer accessibility in rhabdomyosarcoma and represents a general tumor dependency
Source: eLife journal article supplement (doi:10.7554/elife.54993), 2020-08-03
Supplement: supp [file elife-54993-supp-v1.zip › elife_poa_e54993_Figure_3_Source_data_1.xlsx]

## Sheet: Fig.3C and D
NuRD ChIP-seq locations.
TSS - transcription start site
TTS - transcription termination site
Chromosome	Start	End	Distance to TSS	Annotation	Nearest gene	HDAC2	RBBP4	MTA2	CHD4
chr1	3716523	3716880	-3639	Intergenic	LRRC47	Present	Present	Present	Present
chr1	7020629	7020870	175235	intron	CAMTA1	Present	Present	Present	Present
chr1	7351521	7351976	98066	intron	LOC102725193	Present	Present	Present	Present
chr1	7353800	7354191	95819	intron	LOC102725193	Present	Present	Present	Present
chr1	7354334	7354426	95434	intron	LOC102725193	Present	Present	Present	Present
chr1	7358268	7358655	91353	intron	LOC102725193	Present	Present	Present	Present
chr1	7359381	7359845	90201	intron	LOC102725193	Present	Present	Present	Present
chr1	7395391	7395732	54253	intron	LOC102725193	Present	Present	Present	Present
chr1	8198021	8198240	-70602	Intergenic	LINC01714	Present	Present	Present	Present
chr1	8523471	8523742	31367	intron	SNORD128	Present	Present	Present	Present
chr1	8586010	8586249	-31156	intron	SNORD128	Present	Present	Present	Present
chr1	8882772	8882935	-5154	Intergenic	RERE	Present	Present	Present	Present
chr1	10370567	10370879	11699	intron	RNU6-8	Present	Present	Present	Present
chr1	10901172	10901411	-44588	Intergenic	CASZ1	Present	Present	Present	Present
chr1	12538212	12538578	-28905	intron	SNORA59A	Present	Present	Present	Present
chr1	12551748	12552070	-15391	intron	SNORA59A	Present	Present	Present	Present
chr1	15505258	15505966	-7492	intron	C1orf195	Present	Present	Present	Present
chr1	15786559	15786720	3412	intron	CELA2A	Present	Present	Present	Present
chr1	16516682	16516753	22430	Intergenic	ARHGEF19	Present	Present	Present	Present
chr1	17039967	17040251	6543	intron	ESPNP	Present	Present	Present	Present
chr1	17571802	17572062	-3661	3'UTR	PADI3	Present	Present	Present	Present
chr1	18464428	18464878	30361	intron	IGSF21	Present	Present	Present	Present
chr1	18517126	18517411	82976	intron	IGSF21	Present	Present	Present	Present
chr1	19038427	19039145	81446	intron	PAX7	Present	Present	Present	Present
chr1	19267592	19268056	15346	intron	IFFO2	Present	Present	Present	Present
chr1	19436774	19437005	99871	exon	UBR4	Present	Present	Present	Present
chr1	20061208	20061477	64500	intron	TMCO4	Present	Present	Present	Present
chr1	20061884	20062190	63805	intron	TMCO4	Present	Present	Present	Present
chr1	20062368	20062643	63337	intron	TMCO4	Present	Present	Present	Present
chr1	20085794	20086141	39875	intron	TMCO4	Present	Present	Present	Present
chr1	20088774	20088985	36963	intron	TMCO4	Present	Present	Present	Present
chr1	20091887	20092750	33524	intron	TMCO4	Present	Present	Present	Present
chr1	20095129	20095316	30620	intron	TMCO4	Present	Present	Present	Present
chr1	20095489	20095756	30220	intron	TMCO4	Present	Present	Present	Present
chr1	20096953	20097089	28821	intron	TMCO4	Present	Present	Present	Present
chr1	20142452	20142687	-793	promoter-TSS	RNF186	Present	Present	Present	Present
chr1	20560396	20560623	-9079	Intergenic	LINC01757	Present	Present	Present	Present
chr1	20608465	20608730	-8771	Intergenic	VWA5B1	Present	Present	Present	Present
chr1	20652216	20652372	34926	intron	VWA5B1	Present	Present	Present	Present
chr1	20685171	20685431	67933	TTS	VWA5B1	Present	Present	Present	Present
chr1	21036818	21037579	7302	intron	KIF17	Present	Present	Present	Present
chr1	21038377	21038675	5974	intron	KIF17	Present	Present	Present	Present
chr1	21645192	21645250	25438	intron	LOC100506801	Present	Present	Present	Present
chr1	21665050	21665302	6821	intron	ECE1	Present	Present	Present	Present
chr1	22236743	22236999	26932	intron	HSPG2	Present	Present	Present	Present
chr1	22237424	22237853	26165	intron	HSPG2	Present	Present	Present	Present
chr1	22266196	22266623	-2606	Intergenic	HSPG2	Present	Present	Present	Present
chr1	22539375	22539604	-53243	Intergenic	MIR4418	Present	Present	Present	Present
chr1	22859847	22860062	-30028	Intergenic	EPHA8	Present	Present	Present	Present
chr1	23134817	23135010	54806	intron	MIR4253	Present	Present	Present	Present
chr1	23299352	23299619	-126	promoter-TSS	LACTBL1	Present	Present	Present	Present
chr1	23426831	23427015	56125	intron	MIR3115	Present	Present	Present	Present
chr1	23696116	23696290	126	non-coding	ZNF436	Present	Present	Present	Present
chr1	23852321	23852582	4029	intron	LOC101928163	Present	Present	Present	Present
chr1	23855059	23855383	2504	TTS	E2F2	Present	Present	Present	Present
chr1	23882034	23882228	3861	Intergenic	ID3	Present	Present	Present	Present
chr1	23907720	23908114	-21925	Intergenic	ID3	Present	Present	Present	Present
chr1	23924860	23925263	-28763	Intergenic	MDS2	Present	Present	Present	Present
chr1	24616462	24616707	-29263	Intergenic	GRHL3	Present	Present	Present	Present
chr1	24691245	24691886	42035	TTS	GRHL3	Present	Present	Present	Present
chr1	24691965	24692060	42482	intron	GRHL3	Present	Present	Present	Present
chr1	24712773	24713024	-27079	intron	NIPAL3	Present	Present	Present	Present
chr1	25881485	25881862	11597	intron	LDLRAP1	Present	Present	Present	Present
chr1	26026338	26026495	82457	intron	MAN1C1	Present	Present	Present	Present
chr1	26034037	26034532	90325	intron	MAN1C1	Present	Present	Present	Present
chr1	26054400	26054697	-72136	intron	SELENON	Present	Present	Present	Present
chr1	26056210	26056727	-70216	intron	SELENON	Present	Present	Present	Present
chr1	26063697	26064030	-62821	intron	SELENON	Present	Present	Present	Present
chr1	26065049	26065239	-61540	intron	SELENON	Present	Present	Present	Present
chr1	26069954	26070286	-56564	intron	SELENON	Present	Present	Present	Present
chr1	26244593	26244796	-11326	Intergenic	STMN1	Present	Present	Present	Present
chr1	26323384	26323724	1000	intron	PAFAH2	Present	Present	Present	Present
chr1	26348026	26348160	-173	promoter-TSS	EXTL1	Present	Present	Present	Present
chr1	27018754	27019004	1743	non-coding	LOC101928728	Present	Present	Present	Present
chr1	27019441	27019751	1026	non-coding	LOC101928728	Present	Present	Present	Present
chr1	27049731	27050116	27417	intron	ARID1A	Present	Present	Present	Present
chr1	27095483	27095594	-18916	intron	PIGV	Present	Present	Present	Present
chr1	27730426	27730642	11408	TTS	GPR3	Present	Present	Present	Present
chr1	27744913	27745150	25905	intron	GPR3	Present	Present	Present	Present
chr1	27755118	27755320	36093	intron	GPR3	Present	Present	Present	Present
chr1	27817050	27817097	-395	promoter-TSS	WASF2	Present	Present	Present	Present
chr1	27831395	27831739	-14889	Intergenic	WASF2	Present	Present	Present	Present
chr1	27831861	27832056	-15280	Intergenic	WASF2	Present	Present	Present	Present
chr1	28201737	28202046	2836	intron	THEMIS2	Present	Present	Present	Present
chr1	29139722	29139961	1159	intron	OPRD1	Present	Present	Present	Present
chr1	30148306	30148979	361817	Intergenic	LINC01648	Present	Present	Present	Present
chr1	30182085	30182122	328356	Intergenic	LINC01648	Present	Present	Present	Present
chr1	30788488	30788652	-278111	Intergenic	LINC01648	Present	Present	Present	Present
chr1	30998714	30999245	-192640	Intergenic	MATN1-AS1	Present	Present	Present	Present
chr1	31136503	31136746	-54995	Intergenic	MATN1-AS1	Present	Present	Present	Present
chr1	31180663	31181023	-10776	Intergenic	MATN1-AS1	Present	Present	Present	Present
chr1	31181176	31181219	-10422	Intergenic	MATN1-AS1	Present	Present	Present	Present
chr1	31205563	31205702	6447	3'UTR	MIR4420	Present	Present	Present	Present
chr1	31233366	31233844	-2984	Intergenic	LAPTM5	Present	Present	Present	Present
chr1	31255362	31255850	-24985	Intergenic	LAPTM5	Present	Present	Present	Present
chr1	31259259	31259691	-28854	Intergenic	LAPTM5	Present	Present	Present	Present
chr1	31282422	31282602	-14987	Intergenic	LINC01778	Present	Present	Present	Present
chr1	31289389	31289784	-7913	Intergenic	LINC01778	Present	Present	Present	Present
chr1	31296844	31297074	-540	promoter-TSS	LINC01778	Present	Present	Present	Present
chr1	31351980	31352382	29424	intron	SDC3	Present	Present	Present	Present
chr1	31356769	31356924	24759	intron	SDC3	Present	Present	Present	Present
chr1	31361553	31361698	19980	intron	SDC3	Present	Present	Present	Present
chr1	31454067	31454308	-13103	exon	SNORD103C	Present	Present	Present	Present
chr1	31878559	31878753	-3968	Intergenic	SERINC2	Present	Present	Present	Present
chr1	32166911	32167091	2617	intron	COL16A1	Present	Present	Present	Present
chr1	32860310	32860527	-376	promoter-TSS	BSDC1	Present	Present	Present	Present
chr1	33199580	33199740	-7771	Intergenic	KIAA1522	Present	Present	Present	Present
chr1	33337299	33337508	682	promoter-TSS	FNDC5	Present	Present	Present	Present
chr1	33338240	33338475	-272	promoter-TSS	FNDC5	Present	Present	Present	Present
chr1	33526155	33526438	-20458	Intergenic	AZIN2	Present	Present	Present	Present
chr1	33526563	33526801	-20072	Intergenic	AZIN2	Present	Present	Present	Present
chr1	33562040	33562444	14463	intron	AZIN2	Present	Present	Present	Present
chr1	33565192	33565442	17538	intron	AZIN2	Present	Present	Present	Present
chr1	33617317	33617707	24639	intron	TRIM62	Present	Present	Present	Present
chr1	33618841	33619050	23206	intron	TRIM62	Present	Present	Present	Present
chr1	33629263	33629693	12673	intron	TRIM62	Present	Present	Present	Present
chr1	33634886	33635188	7114	intron	TRIM62	Present	Present	Present	Present
chr1	33641917	33642394	-4	promoter-TSS	TRIM62	Present	Present	Present	Present
chr1	33807881	33808367	7376	intron	PHC2	Present	Present	Present	Present
chr1	33829276	33829345	11884	TTS	PHC2	Present	Present	Present	Present
chr1	33829509	33829544	11668	TTS	PHC2	Present	Present	Present	Present
chr1	33830172	33830574	10821	intron	PHC2	Present	Present	Present	Present
chr1	33848230	33848864	-7353	Intergenic	PHC2	Present	Present	Present	Present
chr1	33855115	33855272	-13999	Intergenic	PHC2	Present	Present	Present	Present
chr1	35448489	35448671	2368	intron	TMEM35B	Present	Present	Present	Present
chr1	38478762	38478949	449	intron	UTP11	Present	Present	Present	Present
chr1	38604285	38604683	49581	Intergenic	MIR3659	Present	Present	Present	Present
chr1	39607671	39607926	57959	intron	MACF1	Present	Present	Present	Present
chr1	39737907	39738228	-136678	intron	KIAA0754	Present	Present	Present	Present
chr1	39864394	39864606	-10245	intron	KIAA0754	Present	Present	Present	Present
chr1	39876692	39876899	2050	exon	KIAA0754	Present	Present	Present	Present
chr1	39878557	39878806	3936	exon	KIAA0754	Present	Present	Present	Present
chr1	40100938	40101028	4332	intron	HEYL	Present	Present	Present	Present
chr1	40111896	40112245	-6755	Intergenic	HEYL	Present	Present	Present	Present
chr1	40311014	40311646	37846	intron	TRIT1	Present	Present	Present	Present
chr1	40311839	40311965	37274	intron	TRIT1	Present	Present	Present	Present
chr1	40362473	40362939	4883	3'UTR	MYCL	Present	Present	Present	Present
chr1	40427417	40427724	6753	intron	MFSD2A	Present	Present	Present	Present
chr1	41469494	41469758	-10636	intron	SLFNL1-AS1	Present	Present	Present	Present
chr1	41837322	41838001	3680	intron	LOC101929901	Present	Present	Present	Present
chr1	41838297	41838299	3043	intron	LOC101929901	Present	Present	Present	Present
chr1	41866029	41866123	-24735	Intergenic	LOC101929901	Present	Present	Present	Present
chr1	41920051	41920191	30233	Intergenic	EDN2	Present	Present	Present	Present
chr1	41969787	41969999	-19539	Intergenic	EDN2	Present	Present	Present	Present
chr1	42610095	42610256	-8906	Intergenic	GUCA2B	Present	Present	Present	Present
chr1	42610339	42610529	-8647	Intergenic	GUCA2B	Present	Present	Present	Present
chr1	43429403	43429538	4750	intron	SLC2A1-AS1	Present	Present	Present	Present
chr1	43959666	43960011	-31870	Intergenic	PTPRF	Present	Present	Present	Present
chr1	44300259	44300483	-3923	intron	MIR6079	Present	Present	Present	Present
chr1	44300598	44301063	-3464	intron	MIR6079	Present	Present	Present	Present
chr1	44319190	44319505	15053	intron	MIR6079	Present	Present	Present	Present
chr1	44501698	44501903	-4666	Intergenic	SLC6A9	Present	Present	Present	Present
chr1	44502321	44502511	-5282	Intergenic	SLC6A9	Present	Present	Present	Present
chr1	44793587	44794053	27109	intron	ERI3	Present	Present	Present	Present
chr1	45069427	45069715	58406	intron	MIR5584	Present	Present	Present	Present
chr1	45109626	45109972	26929	intron	SNORD145	Present	Present	Present	Present
chr1	45413106	45413155	39137	intron	EIF2B3	Present	Present	Present	Present
chr1	48959730	48960501	-22235	Intergenic	SPATA6	Present	Present	Present	Present
chr1	53064926	53065233	-2964	Intergenic	GPX7	Present	Present	Present	Present
chr1	55009925	55010230	-3824	Intergenic	ACOT11	Present	Present	Present	Present
chr1	57877045	57877427	11548	intron	DAB1	Present	Present	Present	Present
chr1	59058252	59058416	-15410	Intergenic	TACSTD2	Present	Present	Present	Present
chr1	59348231	59348482	97533	intron	LINC01135	Present	Present	Present	Present
chr1	59348967	59349297	98309	intron	LINC01135	Present	Present	Present	Present
chr1	59349681	59349883	98959	intron	LINC01135	Present	Present	Present	Present
chr1	59361953	59362449	111378	intron	LINC01135	Present	Present	Present	Present
chr1	59594612	59594984	17681	Intergenic	HSD52	Present	Present	Present	Present
chr1	59602680	59602975	9652	intron	HSD52	Present	Present	Present	Present
chr1	59616682	59617235	-4479	Intergenic	HSD52	Present	Present	Present	Present
chr1	59622396	59622776	-10107	Intergenic	HSD52	Present	Present	Present	Present
chr1	59629327	59629788	-17078	Intergenic	HSD52	Present	Present	Present	Present
chr1	59680290	59680877	-68104	Intergenic	HSD52	Present	Present	Present	Present
chr1	59680996	59681062	-68550	Intergenic	HSD52	Present	Present	Present	Present
chr1	59689998	59690259	-72357	Intergenic	FGGY	Present	Present	Present	Present
chr1	59709247	59709529	-53097	Intergenic	FGGY	Present	Present	Present	Present
chr1	59782456	59782773	6910	intron	FGGY	Present	Present	Present	Present
chr1	59833236	59833512	57670	intron	FGGY	Present	Present	Present	Present
chr1	59858980	59859364	83468	intron	FGGY	Present	Present	Present	Present
chr1	59880105	59880697	-100901	intron	FGGY	Present	Present	Present	Present
chr1	59881249	59881439	-99958	intron	FGGY	Present	Present	Present	Present
chr1	59888728	59888981	-92448	intron	FGGY	Present	Present	Present	Present
chr1	59892765	59893358	-88241	intron	FGGY	Present	Present	Present	Present
chr1	59900043	59900324	-81119	intron	FGGY	Present	Present	Present	Present
chr1	59942998	59943213	-38197	intron	FGGY	Present	Present	Present	Present
chr1	59964471	59964618	-16758	intron	FGGY	Present	Present	Present	Present
chr1	60066894	60067064	85677	intron	FGGY	Present	Present	Present	Present
chr1	60135474	60135703	63380	intron	MIR4711	Present	Present	Present	Present
chr1	60137082	60137229	61813	intron	MIR4711	Present	Present	Present	Present
chr1	60148152	60148364	50710	intron	MIR4711	Present	Present	Present	Present
chr1	60164215	60164323	34699	intron	MIR4711	Present	Present	Present	Present
chr1	60180868	60181073	17998	intron	MIR4711	Present	Present	Present	Present
chr1	60968917	60969158	119320	Intergenic	LINC01748	Present	Present	Present	Present
chr1	61369213	61369307	67188	Intergenic	NFIA-AS2	Present	Present	Present	Present
chr1	61803615	61804022	-84628	intron	NFIA-AS1	Present	Present	Present	Present
chr1	62765543	62765910	19379	intron	KANK4	Present	Present	Present	Present
chr1	62850413	62850572	-51483	Intergenic	USP1	Present	Present	Present	Present
chr1	63429094	63429157	47471	Intergenic	LINC01739	Present	Present	Present	Present
chr1	64109560	64110026	20906	intron	PGM1	Present	Present	Present	Present
chr1	64119642	64120113	30990	intron	PGM1	Present	Present	Present	Present
chr1	64180009	64180279	-59544	Intergenic	ROR1	Present	Present	Present	Present
chr1	64197411	64197445	-42260	Intergenic	ROR1	Present	Present	Present	Present
chr1	64505216	64505436	72562	intron	ROR1-AS1	Present	Present	Present	Present
chr1	65441030	65441154	-8473	intron	JAK1	Present	Present	Present	Present
chr1	68111939	68112244	-38793	Intergenic	GADD45A	Present	Present	Present	Present
chr1	68112460	68113072	-38118	Intergenic	GADD45A	Present	Present	Present	Present
chr1	68115715	68115886	-35084	Intergenic	GADD45A	Present	Present	Present	Present
chr1	68170053	68170368	19326	3'UTR	GADD45A	Present	Present	Present	Present
chr1	68177613	68177791	26818	intron	GADD45A	Present	Present	Present	Present
chr1	68190712	68190899	39921	intron	GADD45A	Present	Present	Present	Present
chr1	68198486	68198789	47753	intron	GADD45A	Present	Present	Present	Present
chr1	68202054	68202121	51203	intron	GADD45A	Present	Present	Present	Present
chr1	68215840	68216090	65081	intron	GADD45A	Present	Present	Present	Present
chr1	68639750	68640061	9388	intron	MIR1262	Present	Present	Present	Present
chr1	68641901	68641991	7347	intron	MIR1262	Present	Present	Present	Present
chr1	76732351	76732673	192081	intron	ST6GALNAC3	Present	Present	Present	Present
chr1	76732843	76732961	192471	intron	ST6GALNAC3	Present	Present	Present	Present
chr1	76802501	76803149	262394	intron	ST6GALNAC3	Present	Present	Present	Present
chr1	77236788	77237036	8040	intron	LINC02567	Present	Present	Present	Present
chr1	77980237	77980421	168014	intron	ZZZ3	Present	Present	Present	Present
chr1	79545581	79545792	-73271	Intergenic	ADGRL4	Present	Present	Present	Present
chr1	81592765	81593187	-178901	Intergenic	ADGRL2	Present	Present	Present	Present
chr1	82386042	82386438	118102	intron	ADGRL2	Present	Present	Present	Present
chr1	82626660	82626840	358612	Intergenic	ADGRL2	Present	Present	Present	Present
chr1	82628215	82628410	360174	Intergenic	ADGRL2	Present	Present	Present	Present
chr1	83568530	83568785	-116766	intron	LINC01361	Present	Present	Present	Present
chr1	85706054	85706151	19243	Intergenic	C1orf52	Present	Present	Present	Present
chr1	85794722	85794979	-52535	intron	BCL10	Present	Present	Present	Present
chr1	85796153	85796180	-53851	intron	BCL10	Present	Present	Present	Present
chr1	85960174	85960489	-29489	intron	DDAH1	Present	Present	Present	Present
chr1	87239931	87240128	69770	Intergenic	SH3GLB1	Present	Present	Present	Present
chr1	87633789	87633894	36232	non-coding	LINC01140	Present	Present	Present	Present
chr1	87661693	87662077	-16467	Intergenic	LINC02801	Present	Present	Present	Present
chr1	87666566	87666772	-11683	Intergenic	LINC02801	Present	Present	Present	Present
chr1	87692100	87692296	13846	intron	LINC02801	Present	Present	Present	Present
chr1	90868800	90868992	-254411	Intergenic	SNORD3G	Present	Present	Present	Present
chr1	91590663	91590990	-103014	Intergenic	ZNF644	Present	Present	Present	Present
chr1	92295811	92296036	55785	intron	TGFBR3	Present	Present	Present	Present
chr1	92329710	92329850	21928	intron	TGFBR3	Present	Present	Present	Present
chr1	94018817	94018984	31819	3'UTR	BCAR3	Present	Present	Present	Present
chr1	94074265	94074588	5228	intron	BCAR3	Present	Present	Present	Present
chr1	94132319	94132573	14480	intron	BCAR3	Present	Present	Present	Present
chr1	94133291	94133438	13562	intron	BCAR3	Present	Present	Present	Present
chr1	94133624	94134105	13062	intron	BCAR3	Present	Present	Present	Present
chr1	94134988	94135309	11778	intron	BCAR3	Present	Present	Present	Present
chr1	94135809	94136080	10982	intron	BCAR3	Present	Present	Present	Present
chr1	94187940	94188457	-40805	intron	BCAR3	Present	Present	Present	Present
chr1	94206293	94206656	34465	intron	MIG7	Present	Present	Present	Present
chr1	94238962	94239176	1870	intron	MIG7	Present	Present	Present	Present
chr1	94313578	94313817	-922	promoter-TSS	BCAR3	Present	Present	Present	Present
chr1	94505234	94505408	81383	intron	ABCA4	Present	Present	Present	Present
chr1	94509810	94510028	76785	intron	ABCA4	Present	Present	Present	Present
chr1	94534518	94534793	52049	intron	ABCA4	Present	Present	Present	Present
chr1	94535021	94535696	51346	intron	ABCA4	Present	Present	Present	Present
chr1	94560009	94560067	26666	intron	ABCA4	Present	Present	Present	Present
chr1	94560506	94561274	25814	intron	ABCA4	Present	Present	Present	Present
chr1	94591841	94592108	-5270	Intergenic	ABCA4	Present	Present	Present	Present
chr1	95100554	95100774	91406	intron	MIR12133	Present	Present	Present	Present
chr1	95269128	95269626	16411	intron	SLC44A3-AS1	Present	Present	Present	Present
chr1	95330968	95331173	41021	intron	SLC44A3	Present	Present	Present	Present
chr1	95339461	95340059	49711	intron	SLC44A3	Present	Present	Present	Present
chr1	95552753	95552923	-5235	Intergenic	TLCD4	Present	Present	Present	Present
chr1	95582296	95582521	-503	promoter-TSS	TLCD4	Present	Present	Present	Present
chr1	95582594	95582607	-311	promoter-TSS	TLCD4	Present	Present	Present	Present
chr1	98390825	98391049	-4322	Intergenic	DPYD	Present	Present	Present	Present
chr1	100151099	100151577	27171	intron	MIR548N	Present	Present	Present	Present
chr1	101050346	101050627	46791	Intergenic	GPR88	Present	Present	Present	Present
chr1	101517363	101517529	26044	intron	LOC102606465	Present	Present	Present	Present
chr1	108479175	108479623	-27666	intron	VAV3-AS1	Present	Present	Present	Present
chr1	108479854	108480045	-27116	intron	VAV3-AS1	Present	Present	Present	Present
chr1	108534467	108534665	-26764	intron	VAV3	Present	Present	Present	Present
chr1	108543331	108543795	-35761	Intergenic	VAV3	Present	Present	Present	Present
chr1	108559123	108559413	-51466	Intergenic	VAV3	Present	Present	Present	Present
chr1	109631560	109631713	-1750	Intergenic	TMEM167B	Present	Present	Present	Present
chr1	109839510	109839798	9979	intron	MYBPHL	Present	Present	Present	Present
chr1	109841371	109841939	7978	intron	MYBPHL	Present	Present	Present	Present
chr1	109842216	109842508	7271	intron	MYBPHL	Present	Present	Present	Present
chr1	110072461	110073850	-9339	Intergenic	GPR61	Present	Present	Present	Present
chr1	110074601	110074850	-7769	Intergenic	GPR61	Present	Present	Present	Present
chr1	111771048	111771408	893	intron	CHI3L2	Present	Present	Present	Present
chr1	112267714	112268067	14127	3'UTR	INKA2	Present	Present	Present	Present
chr1	112271970	112272200	9932	intron	INKA2	Present	Present	Present	Present
chr1	112272340	112272584	9555	intron	INKA2	Present	Present	Present	Present
chr1	112276387	112276873	5387	intron	INKA2	Present	Present	Present	Present
chr1	112278399	112278925	3355	intron	INKA2	Present	Present	Present	Present
chr1	112423656	112423993	-24297	intron	KCND3-IT1	Present	Present	Present	Present
chr1	112449624	112449828	-2553	intron	KCND3-AS1	Present	Present	Present	Present
chr1	112485971	112486176	33794	intron	KCND3-AS1	Present	Present	Present	Present
chr1	112789672	112789980	-149010	Intergenic	CTTNBP2NL	Present	Present	Present	Present
chr1	113065212	113065562	13800	TTS	WNT2B	Present	Present	Present	Present
chr1	114884615	114884851	169091	Intergenic	TRIM33	Present	Present	Present	Present
chr1	114885074	114885285	168645	Intergenic	TRIM33	Present	Present	Present	Present
chr1	116270499	116270822	40766	intron	CASQ2	Present	Present	Present	Present
chr1	116307776	116307995	3541	intron	CASQ2	Present	Present	Present	Present
chr1	117348907	117349158	51980	Intergenic	CD2	Present	Present	Present	Present
chr1	117367587	117367752	70617	Intergenic	CD2	Present	Present	Present	Present
chr1	117368106	117368737	71369	Intergenic	CD2	Present	Present	Present	Present
chr1	117390303	117390364	-62205	Intergenic	PTGFRN	Present	Present	Present	Present
chr1	117395570	117395834	-56836	Intergenic	PTGFRN	Present	Present	Present	Present
chr1	117396395	117396705	-55988	Intergenic	PTGFRN	Present	Present	Present	Present
chr1	117397888	117398182	-54503	Intergenic	PTGFRN	Present	Present	Present	Present
chr1	117398570	117398791	-53858	Intergenic	PTGFRN	Present	Present	Present	Present
chr1	117421697	117422044	-30668	Intergenic	PTGFRN	Present	Present	Present	Present
chr1	117424726	117424881	-27735	Intergenic	PTGFRN	Present	Present	Present	Present
chr1	117533378	117533810	-10778	TTS	CD101	Present	Present	Present	Present
chr1	117560402	117560559	16108	intron	CD101	Present	Present	Present	Present
chr1	117689727	117689918	-25451	intron	TRIM45	Present	Present	Present	Present
chr1	117803857	117803954	-34183	Intergenic	LINC01525	Present	Present	Present	Present
chr1	117804127	117804231	-33909	Intergenic	LINC01525	Present	Present	Present	Present
chr1	118747355	118747604	-19628	Intergenic	SPAG17	Present	Present	Present	Present
chr1	118792349	118792608	-64627	Intergenic	SPAG17	Present	Present	Present	Present
chr1	118795837	118796451	-68293	Intergenic	SPAG17	Present	Present	Present	Present
chr1	118837791	118838140	-110114	Intergenic	SPAG17	Present	Present	Present	Present
chr1	118841025	118841321	-113322	Intergenic	SPAG17	Present	Present	Present	Present
chr1	118860473	118860771	-132771	Intergenic	SPAG17	Present	Present	Present	Present
chr1	118876166	118876842	-148653	Intergenic	SPAG17	Present	Present	Present	Present
chr1	118878114	118878305	-150358	Intergenic	SPAG17	Present	Present	Present	Present
chr1	119028975	119029268	-301270	Intergenic	SPAG17	Present	Present	Present	Present
chr1	119046789	119047227	-319157	Intergenic	SPAG17	Present	Present	Present	Present
chr1	119282097	119282266	248785	Intergenic	TBX15	Present	Present	Present	Present
chr1	119328008	119328187	202869	Intergenic	TBX15	Present	Present	Present	Present
chr1	119331029	119331468	199718	Intergenic	TBX15	Present	Present	Present	Present
chr1	119475683	119475786	55232	intron	TBX15	Present	Present	Present	Present
chr1	119872162	119872469	1440	intron	LINC01780	Present	Present	Present	Present
chr1	120060276	120060538	10574	Intergenic	HSD3B1	Present	Present	Present	Present
chr1	120096800	120097118	-9544	Intergenic	HSD3BP4	Present	Present	Present	Present
chr1	120372379	120372463	15082	Intergenic	NBPF7	Present	Present	Present	Present
chr1	144010130	144010337	-95386	Intergenic	FAM72D	Present	Present	Present	Present
chr1	144010672	144010894	-95936	Intergenic	FAM72D	Present	Present	Present	Present
chr1	144989532	144989824	5355	intron	PDE4DIP	Present	Present	Present	Present
chr1	144994932	144995200	16	promoter-TSS	PDE4DIP	Present	Present	Present	Present
chr1	145000817	145000974	-3784	intron	PDE4DIP	Present	Present	Present	Present
chr1	151282109	151282147	17764	intron	PI4KB	Present	Present	Present	Present
chr1	151282269	151282635	17440	intron	PI4KB	Present	Present	Present	Present
chr1	152020405	152020633	-11039	Intergenic	S100A11	Present	Present	Present	Present
chr1	154720503	154720716	111743	intron	KCNN3	Present	Present	Present	Present
chr1	154740017	154740349	92169	intron	KCNN3	Present	Present	Present	Present
chr1	154774148	154774358	58099	intron	KCNN3	Present	Present	Present	Present
chr1	154774878	154775000	57413	intron	KCNN3	Present	Present	Present	Present
chr1	154775308	154775694	56851	intron	KCNN3	Present	Present	Present	Present
chr1	154775847	154776317	56270	intron	KCNN3	Present	Present	Present	Present
chr1	154785756	154785760	46594	intron	KCNN3	Present	Present	Present	Present
chr1	155938650	155939032	9125	intron	ARHGEF2	Present	Present	Present	Present
chr1	155953273	155953530	-4050	Intergenic	ARHGEF2	Present	Present	Present	Present
chr1	156466360	156466625	4075	intron	MEF2D	Present	Present	Present	Present
chr1	156631832	156632153	15207	Intergenic	NES	Present	Present	Present	Present
chr1	156647345	156647461	-204	promoter-TSS	NES	Present	Present	Present	Present
chr1	157039444	157039731	-24053	Intergenic	ARHGEF11	Present	Present	Present	Present
chr1	157989409	157989615	-5828	intron	KIRREL1-IT1	Present	Present	Present	Present
chr1	160344511	160344843	7816	Intergenic	NHLH1	Present	Present	Present	Present
chr1	161675992	161676323	-862	promoter-TSS	FCRLA	Present	Present	Present	Present
chr1	161676672	161676906	-230	promoter-TSS	FCRLA	Present	Present	Present	Present
chr1	161973682	161974089	20370	intron	OLFML2B	Present	Present	Present	Present
chr1	161980997	161981582	12966	intron	OLFML2B	Present	Present	Present	Present
chr1	162601265	162601441	-412	promoter-TSS	DDR2	Present	Present	Present	Present
chr1	164774645	164774959	-30924	intron	LOC100505795	Present	Present	Present	Present
chr1	165257612	165257713	67816	intron	LMX1A	Present	Present	Present	Present
chr1	165414163	165414269	147	non-coding	RXRG	Present	Present	Present	Present
chr1	165924317	165924507	47254	Intergenic	MIR3658	Present	Present	Present	Present
chr1	166459667	166459915	-515	promoter-TSS	LINC01675	Present	Present	Present	Present
chr1	166563966	166564177	-9082	Intergenic	FMO9P	Present	Present	Present	Present
chr1	167063097	167063475	-26	promoter-TSS	DUSP27	Present	Present	Present	Present
chr1	167499421	167499450	-11588	Intergenic	CD247	Present	Present	Present	Present
chr1	167604658	167604787	5253	intron	RCSD1	Present	Present	Present	Present
chr1	168439007	168439248	25755	intron	LOC101928565	Present	Present	Present	Present
chr1	170986633	170986904	-73278	intron	FMO3	Present	Present	Present	Present
chr1	172320992	172321138	-68760	intron	C1orf105	Present	Present	Present	Present
chr1	172421807	172422029	-115	promoter-TSS	C1orf105	Present	Present	Present	Present
chr1	180894957	180895062	12976	intron	KIAA1614	Present	Present	Present	Present
chr1	180895489	180895847	13635	intron	KIAA1614	Present	Present	Present	Present
chr1	181064061	181064302	6345	Intergenic	IER5	Present	Present	Present	Present
chr1	181065433	181065694	7727	Intergenic	IER5	Present	Present	Present	Present
chr1	181066362	181066569	8629	Intergenic	IER5	Present	Present	Present	Present
chr1	182091493	182091770	-60784	Intergenic	ZNF648	Present	Present	Present	Present
chr1	182269288	182269615	13745	intron	LINC01344	Present	Present	Present	Present
chr1	182581070	182581260	-3110	Intergenic	LINC01686	Present	Present	Present	Present
chr1	182585385	182585692	1263	non-coding	LINC01686	Present	Present	Present	Present
chr1	182602744	182603211	18702	Intergenic	LINC01686	Present	Present	Present	Present
chr1	182668613	182668921	-13230	Intergenic	LINC01688	Present	Present	Present	Present
chr1	182669406	182669653	-12468	Intergenic	LINC01688	Present	Present	Present	Present
chr1	183203996	183204163	48680	intron	LAMC2	Present	Present	Present	Present
chr1	183850927	183851168	76793	intron	RGL1	Present	Present	Present	Present
chr1	183994303	183994457	12482	intron	COLGALT2	Present	Present	Present	Present
chr1	201280103	201280557	27696	intron	PKP1	Present	Present	Present	Present
chr1	201346162	201346223	616	intron	TNNT2	Present	Present	Present	Present
chr1	201346631	201346692	147	intron	TNNT2	Present	Present	Present	Present
chr1	201500801	201501253	11995	TTS	RPS10P7	Present	Present	Present	Present
chr1	201609677	201610002	-7611	Intergenic	NAV1	Present	Present	Present	Present
chr1	201625752	201626038	8445	intron	NAV1	Present	Present	Present	Present
chr1	202558332	202558643	49245	TTS	PPP1R12B	Present	Present	Present	Present
chr1	202933763	202934488	2260	intron	CYB5R1	Present	Present	Present	Present
chr1	203034394	203034593	-18430	intron	MYOPARR	Present	Present	Present	Present
chr1	203058855	203059188	-3881	Intergenic	MYOG	Present	Present	Present	Present
chr1	203294627	203294880	20106	Intergenic	BTG2	Present	Present	Present	Present
chr1	204263298	204263383	65717	intron	PLEKHA6	Present	Present	Present	Present
chr1	204263499	204263646	65485	intron	PLEKHA6	Present	Present	Present	Present
chr1	205719638	205719747	-382	promoter-TSS	NUCKS1	Present	Present	Present	Present
chr1	205762140	205762350	-17635	intron	RAB29	Present	Present	Present	Present
chr1	205894967	205895100	17551	intron	SLC26A9	Present	Present	Present	Present
chr1	208275451	208275682	142163	intron	PLXNA2	Present	Present	Present	Present
chr1	208408908	208409040	8755	intron	PLXNA2	Present	Present	Present	Present
chr1	209699481	209699839	-57399	Intergenic	CAMK1G	Present	Present	Present	Present
chr1	211870653	211871039	21742	Intergenic	LOC91548	Present	Present	Present	Present
chr1	211877351	211877519	28331	Intergenic	LOC91548	Present	Present	Present	Present
chr1	212686590	212686900	-32291	Intergenic	LINC01740	Present	Present	Present	Present
chr1	212740473	212740690	1905	intron	ATF3	Present	Present	Present	Present
chr1	212810251	212810349	12484	Intergenic	FAM71A	Present	Present	Present	Present
chr1	212841192	212841402	31885	Intergenic	BATF3	Present	Present	Present	Present
chr1	213154244	213154476	30477	intron	VASH2	Present	Present	Present	Present
chr1	219026109	219026225	65686	intron	LINC01710	Present	Present	Present	Present
chr1	226730559	226730792	-5790	Intergenic	STUM	Present	Present	Present	Present
chr1	226850534	226850821	12092	intron	ITPKB-IT1	Present	Present	Present	Present
chr1	226998056	226998423	-60034	Intergenic	PSEN2	Present	Present	Present	Present
chr1	232107297	232107428	45782	intron	DISC1-IT1	Present	Present	Present	Present
chr1	234998650	234998941	100951	Intergenic	LOC101927851	Present	Present	Present	Present
chr1	235092805	235092904	6892	TTS	LOC101927851	Present	Present	Present	Present
chr1	235114413	235114478	-14699	Intergenic	LOC101927851	Present	Present	Present	Present
chr1	235114555	235114623	-14843	Intergenic	LOC101927851	Present	Present	Present	Present
chr1	235123207	235123513	-23614	Intergenic	LOC101927851	Present	Present	Present	Present
chr1	235184155	235184298	-84480	Intergenic	LOC101927851	Present	Present	Present	Present
chr1	239973383	239973699	89631	intron	CHRM3-AS1	Present	Present	Present	Present
chr1	242947543	242947658	-259601	Intergenic	PLD5	Present	Present	Present	Present
chr1	245743402	245743548	-345656	intron	KIF26B-AS1	Present	Present	Present	Present
chr1	246964713	246964831	11853	Intergenic	LINC01341	Present	Present	Present	Present
chr10	5656118	5656333	-18144	Intergenic	LINC02657	Present	Present	Present	Present
chr10	6236400	6236559	-8416	intron	PFKFB3	Present	Present	Present	Present
chr10	7605400	7605608	56132	intron	ITIH5	Present	Present	Present	Present
chr10	7652717	7652887	8834	intron	ITIH5	Present	Present	Present	Present
chr10	7652960	7653124	8594	intron	ITIH5	Present	Present	Present	Present
chr10	10686661	10686988	150053	intron	SFTA1P	Present	Present	Present	Present
chr10	10980751	10980941	13280	intron	LINC00710	Present	Present	Present	Present
chr10	11009065	11009261	-15037	intron	LINC00710	Present	Present	Present	Present
chr10	11054967	11055135	-4784	intron	CELF2	Present	Present	Present	Present
chr10	11068906	11069102	8285	intron	CELF2	Present	Present	Present	Present
chr10	11467362	11467506	-80761	Intergenic	CELF2-AS1	Present	Present	Present	Present
chr10	13002459	13002666	41151	intron	CCDC3	Present	Present	Present	Present
chr10	13002967	13002983	40738	intron	CCDC3	Present	Present	Present	Present
chr10	13003062	13003255	40555	intron	CCDC3	Present	Present	Present	Present
chr10	13003548	13003706	40086	intron	CCDC3	Present	Present	Present	Present
chr10	14302111	14302507	70574	intron	FRMD4A	Present	Present	Present	Present
chr10	14439217	14439464	-14064	Intergenic	MIR4293	Present	Present	Present	Present
chr10	24206275	24206761	222862	intron	KIAA1217	Present	Present	Present	Present
chr10	24407225	24407417	-90399	intron	KIAA1217	Present	Present	Present	Present
chr10	24417453	24417654	-80167	intron	KIAA1217	Present	Present	Present	Present
chr10	30093230	30093482	-67491	Intergenic	SVIL	Present	Present	Present	Present
chr10	30138483	30138723	-112738	Intergenic	SVIL	Present	Present	Present	Present
chr10	30147321	30147528	-121559	Intergenic	SVIL	Present	Present	Present	Present
chr10	30285617	30285881	62766	Intergenic	JCAD	Present	Present	Present	Present
chr10	31893151	31893938	-204860	Intergenic	LOC100505502	Present	Present	Present	Present
chr10	31907663	31907878	-219086	Intergenic	LOC100505502	Present	Present	Present	Present
chr10	31908797	31908805	-220117	Intergenic	LOC100505502	Present	Present	Present	Present
chr10	31939128	31939170	-250465	Intergenic	LOC100505502	Present	Present	Present	Present
chr10	33227509	33227738	-3137	intron	ITGB1	Present	Present	Present	Present
chr10	33411072	33411242	-5422	Intergenic	IATPR	Present	Present	Present	Present
chr10	33562276	33562575	61170	intron	NRP1	Present	Present	Present	Present
chr10	33958830	33958985	102701	Intergenic	LINC00838	Present	Present	Present	Present
chr10	34479525	34479762	-418035	intron	LINC00838	Present	Present	Present	Present
chr10	34588023	34588210	516108	intron	PARD3	Present	Present	Present	Present
chr10	35028833	35029267	75174	intron	PARD3	Present	Present	Present	Present
chr10	35057723	35057871	46427	intron	PARD3	Present	Present	Present	Present
chr10	35069928	35070285	34118	intron	PARD3	Present	Present	Present	Present
chr10	35698078	35698484	72479	intron	CCNY	Present	Present	Present	Present
chr10	35776301	35776526	-117856	intron	GJD4	Present	Present	Present	Present
chr10	36161634	36161715	94444	Intergenic	PCAT5	Present	Present	Present	Present
chr10	36161799	36162024	94681	Intergenic	PCAT5	Present	Present	Present	Present
chr10	36178949	36179258	111873	Intergenic	PCAT5	Present	Present	Present	Present
chr10	36223339	36223966	156422	Intergenic	PCAT5	Present	Present	Present	Present
chr10	36474099	36474237	406938	Intergenic	PCAT5	Present	Present	Present	Present
chr10	36477082	36477390	410006	Intergenic	PCAT5	Present	Present	Present	Present
chr10	36638759	36638885	571592	Intergenic	PCAT5	Present	Present	Present	Present
chr10	37014589	37014802	-400090	Intergenic	ANKRD30A	Present	Present	Present	Present
chr10	37778194	37778376	113574	Intergenic	MTRNR2L7	Present	Present	Present	Present
chr10	37824914	37825104	66850	Intergenic	MTRNR2L7	Present	Present	Present	Present
chr10	44143129	44143315	1025	non-coding	ZNF32	Present	Present	Present	Present
chr10	44435722	44435882	27952	intron	LINC00841	Present	Present	Present	Present
chr10	44516230	44516667	108598	Intergenic	LINC00841	Present	Present	Present	Present
chr10	44540585	44540745	132815	Intergenic	LINC00841	Present	Present	Present	Present
chr10	44690984	44691141	-97136	Intergenic	C10orf142	Present	Present	Present	Present
chr10	44796602	44797062	8634	Intergenic	C10orf142	Present	Present	Present	Present
chr10	45442931	45443053	12145	intron	TMEM72-AS1	Present	Present	Present	Present
chr10	45443163	45443426	11843	intron	TMEM72-AS1	Present	Present	Present	Present
chr10	45458773	45459053	3663	intron	RASSF4	Present	Present	Present	Present
chr10	45459710	45460232	4721	intron	RASSF4	Present	Present	Present	Present
chr10	45587505	45587678	62453	Intergenic	RSU1P2	Present	Present	Present	Present
chr10	48361507	48361650	6509	intron	ZNF488	Present	Present	Present	Present
chr10	50317853	50318410	5436	intron	VSTM4	Present	Present	Present	Present
chr10	50507089	50507311	-15	promoter-TSS	C10orf71	Present	Present	Present	Present
chr10	50567731	50568175	36182	Intergenic	DRGX	Present	Present	Present	Present
chr10	50568497	50568574	35600	Intergenic	DRGX	Present	Present	Present	Present
chr10	53459414	53459634	-169	promoter-TSS	CSTF2T	Present	Present	Present	Present
chr10	54226236	54226600	3875	intron	LNCAROD	Present	Present	Present	Present
chr10	60616328	60616480	141629	Intergenic	FAM133CP	Present	Present	Present	Present
chr10	61082994	61083254	39183	intron	FAM13C	Present	Present	Present	Present
chr10	63553993	63554214	-107355	Intergenic	ARID5B	Present	Present	Present	Present
chr10	63808765	63809152	-158	promoter-TSS	ARID5B	Present	Present	Present	Present
chr10	64216606	64216941	-63434	intron	ZNF365	Present	Present	Present	Present
chr10	64324296	64324460	44171	intron	ZNF365	Present	Present	Present	Present
chr10	65028891	65029105	5	promoter-TSS	JMJD1C	Present	Present	Present	Present
chr10	65374140	65374360	-92600	intron	JMJD1C	Present	Present	Present	Present
chr10	65472076	65472378	-190577	Intergenic	JMJD1C	Present	Present	Present	Present
chr10	65473145	65473355	-191600	Intergenic	JMJD1C	Present	Present	Present	Present
chr10	67691547	67691703	360442	intron	LINC01515	Present	Present	Present	Present
chr10	68082075	68082251	-603631	intron	LRRTM3	Present	Present	Present	Present
chr10	68701383	68701518	15656	intron	LRRTM3	Present	Present	Present	Present
chr10	69881790	69881939	12619	exon	MYPN	Present	Present	Present	Present
chr10	69914017	69914181	44854	intron	MYPN	Present	Present	Present	Present
chr10	70360003	70360302	40058	intron	TET1	Present	Present	Present	Present
chr10	70630934	70631101	-30054	intron	DDX50	Present	Present	Present	Present
chr10	72304257	72304554	58092	intron	PRF1	Present	Present	Present	Present
chr10	72349599	72350014	12691	Intergenic	PRF1	Present	Present	Present	Present
chr10	72357203	72357404	5194	3'UTR	PRF1	Present	Present	Present	Present
chr10	72412971	72413344	-19105	Intergenic	ADAMTS14	Present	Present	Present	Present
chr10	72424363	72424959	-7601	Intergenic	ADAMTS14	Present	Present	Present	Present
chr10	72431922	72432028	-287	promoter-TSS	ADAMTS14	Present	Present	Present	Present
chr10	72476091	72476494	44030	intron	ADAMTS14	Present	Present	Present	Present
chr10	72727766	72727968	29057	Intergenic	LINC02622	Present	Present	Present	Present
chr10	73105009	73105283	26130	intron	SLC29A3	Present	Present	Present	Present
chr10	73307901	73307911	-36229	intron	CDH23-AS1	Present	Present	Present	Present
chr10	73350838	73351013	-79248	intron	CDH23-AS1	Present	Present	Present	Present
chr10	73407710	73408103	71629	TTS	C10orf105	Present	Present	Present	Present
chr10	73408177	73408328	71283	intron	C10orf105	Present	Present	Present	Present
chr10	73527143	73527295	6058	intron	VSIR	Present	Present	Present	Present
chr10	73533918	73534005	-684	promoter-TSS	VSIR	Present	Present	Present	Present
chr10	73620099	73620469	-9276	Intergenic	PSAP	Present	Present	Present	Present
chr10	73848576	73848929	38	promoter-TSS	SPOCK2	Present	Present	Present	Present
chr10	74080485	74080765	34052	Intergenic	DNAJB12	Present	Present	Present	Present
chr10	74777755	74778137	-63382	intron	PLA2G12B	Present	Present	Present	Present
chr10	75193340	75193629	-165	promoter-TSS	MSS51	Present	Present	Present	Present
chr10	75410919	75411032	-177	promoter-TSS	SYNPO2L	Present	Present	Present	Present
chr10	75647119	75647817	-13119	Intergenic	CAMK2G	Present	Present	Present	Present
chr10	75648432	75649095	-14414	Intergenic	CAMK2G	Present	Present	Present	Present
chr10	75666430	75666989	-4150	Intergenic	PLAU	Present	Present	Present	Present
chr10	75668858	75669065	-1898	TTS	PLAU	Present	Present	Present	Present
chr10	75725910	75726100	-31867	Intergenic	VCL	Present	Present	Present	Present
chr10	75758867	75759080	1099	intron	VCL	Present	Present	Present	Present
chr10	76868866	76868918	57	promoter-TSS	DUSP13	Present	Present	Present	Present
chr10	78736873	78737045	89157	intron	KCNMA1-AS1	Present	Present	Present	Present
chr10	79003005	79003167	102497	intron	KCNMA1-AS2	Present	Present	Present	Present
chr10	79004602	79004765	104094	intron	KCNMA1-AS2	Present	Present	Present	Present
chr10	79039069	79039211	71379	intron	KCNMA1	Present	Present	Present	Present
chr10	79068109	79068550	42190	intron	KCNMA1	Present	Present	Present	Present
chr10	79075409	79075590	35020	intron	KCNMA1	Present	Present	Present	Present
chr10	79110461	79110723	-38	promoter-TSS	KCNMA1-AS3	Present	Present	Present	Present
chr10	79286815	79287201	110558	intron	KCNMA1	Present	Present	Present	Present
chr10	79291183	79291718	106116	intron	KCNMA1	Present	Present	Present	Present
chr10	79291899	79292223	105505	intron	KCNMA1	Present	Present	Present	Present
chr10	79324555	79325035	72771	intron	KCNMA1	Present	Present	Present	Present
chr10	79325461	79325487	72092	intron	KCNMA1	Present	Present	Present	Present
chr10	79325997	79326322	71407	intron	KCNMA1	Present	Present	Present	Present
chr10	79327028	79327091	70507	intron	KCNMA1	Present	Present	Present	Present
chr10	79336260	79336565	61154	intron	KCNMA1	Present	Present	Present	Present
chr10	79341570	79341728	55917	intron	KCNMA1	Present	Present	Present	Present
chr10	79685222	79685508	1148	intron	DLG5	Present	Present	Present	Present
chr10	79789268	79789454	-88	promoter-TSS	POLR3A	Present	Present	Present	Present
chr10	80883183	80883554	54645	intron	ZMIZ1	Present	Present	Present	Present
chr10	80883748	80883916	55109	intron	ZMIZ1	Present	Present	Present	Present
chr10	80886186	80886333	57536	intron	ZMIZ1	Present	Present	Present	Present
chr10	80889244	80889426	60612	intron	ZMIZ1	Present	Present	Present	Present
chr10	81250146	81250541	20395	Intergenic	LOC729815	Present	Present	Present	Present
chr10	82012265	82012980	5108	non-coding	LOC100130698	Present	Present	Present	Present
chr10	92681016	92681181	-66	promoter-TSS	ANKRD1	Present	Present	Present	Present
chr10	92690212	92690591	-9369	Intergenic	ANKRD1	Present	Present	Present	Present
chr10	92837563	92837743	32088	Intergenic	LINC00502	Present	Present	Present	Present
chr10	93100540	93100927	-68259	intron	HECTD2	Present	Present	Present	Present
chr10	93351200	93351604	19815	intron	HECTD2-AS1	Present	Present	Present	Present
chr10	93431752	93432080	-39088	Intergenic	PPP1R3C	Present	Present	Present	Present
chr10	95218630	95218799	23377	intron	MYOF	Present	Present	Present	Present
chr10	95506646	95506944	-10771	Intergenic	LGI1	Present	Present	Present	Present
chr10	95706855	95707233	14628	Intergenic	PIPSL	Present	Present	Present	Present
chr10	95751589	95751880	-1954	Intergenic	PLCE1	Present	Present	Present	Present
chr10	95970283	95970509	76431	intron	PLCE1-AS1	Present	Present	Present	Present
chr10	98176590	98176820	-57583	intron	OPALIN	Present	Present	Present	Present
chr10	98207924	98208172	65635	intron	TLL2	Present	Present	Present	Present
chr10	99278333	99278448	19709	intron	UBTD1	Present	Present	Present	Present
chr10	101890582	101890806	-49068	Intergenic	CPN1	Present	Present	Present	Present
chr10	102642562	102643067	-29906	Intergenic	SLF2	Present	Present	Present	Present
chr10	102643210	102643428	-29401	Intergenic	SLF2	Present	Present	Present	Present
chr10	102643534	102643726	-29090	Intergenic	SLF2	Present	Present	Present	Present
chr10	102646559	102647114	-25884	Intergenic	SLF2	Present	Present	Present	Present
chr10	102647749	102647977	-24857	Intergenic	SLF2	Present	Present	Present	Present
chr10	102650504	102650898	-22019	Intergenic	SLF2	Present	Present	Present	Present
chr10	102661051	102661131	-11629	Intergenic	SLF2	Present	Present	Present	Present
chr10	102672242	102672341	-429	promoter-TSS	SLF2	Present	Present	Present	Present
chr10	103054946	103055320	-31826	Intergenic	LINC02681	Present	Present	Present	Present
chr10	103362591	103362809	-1446	intron	MIR3158-2	Present	Present	Present	Present
chr10	103446957	103447161	7868	intron	FBXW4	Present	Present	Present	Present
chr10	103450942	103451174	3869	intron	FBXW4	Present	Present	Present	Present
chr10	103509476	103509607	26330	Intergenic	FGF8	Present	Present	Present	Present
chr10	103532041	103532212	3745	intron	FGF8	Present	Present	Present	Present
chr10	103663634	103664109	-60194	intron	KCNIP2	Present	Present	Present	Present
chr10	103892303	103892477	-361	promoter-TSS	PPRC1	Present	Present	Present	Present
chr10	103892573	103892596	-167	promoter-TSS	PPRC1	Present	Present	Present	Present
chr10	103968479	103968794	-17420	Intergenic	ELOVL3	Present	Present	Present	Present
chr10	103995697	103995873	5484	intron	PITX3	Present	Present	Present	Present
chr10	104022669	104022787	17439	intron	GBF1	Present	Present	Present	Present
chr10	104028872	104029230	23762	intron	GBF1	Present	Present	Present	Present
chr10	104040445	104040660	35263	intron	GBF1	Present	Present	Present	Present
chr10	104419994	104420235	15862	Intergenic	TRIM8	Present	Present	Present	Present
chr10	104420356	104420571	16211	Intergenic	TRIM8	Present	Present	Present	Present
chr10	104536688	104537097	914	intron	WBP1L	Present	Present	Present	Present
chr10	104572084	104572244	25006	intron	CYP17A1	Present	Present	Present	Present
chr10	104615907	104615967	1921	intron	BORCS7	Present	Present	Present	Present
chr10	111658517	111658711	24390	intron	XPNPEP1	Present	Present	Present	Present
chr10	112389672	112389776	-14370	Intergenic	RBM20	Present	Present	Present	Present
chr10	112396651	112397164	-7187	Intergenic	RBM20	Present	Present	Present	Present
chr10	112411330	112411654	7398	intron	RBM20	Present	Present	Present	Present
chr10	112439651	112440053	35758	intron	RBM20	Present	Present	Present	Present
chr10	112466468	112466546	62413	intron	RBM20	Present	Present	Present	Present
chr10	112617524	112617734	13033	Intergenic	PDCD4-AS1	Present	Present	Present	Present
chr10	114535769	114536118	-47312	intron	LOC103344931	Present	Present	Present	Present
chr10	114602664	114602892	19523	intron	LOC103344931	Present	Present	Present	Present
chr10	114715677	114716006	5832	intron	TCF7L2	Present	Present	Present	Present
chr10	114726240	114726535	16378	intron	TCF7L2	Present	Present	Present	Present
chr10	114787645	114787782	-17401	intron	SNORA87	Present	Present	Present	Present
chr10	114787905	114788171	-17076	intron	SNORA87	Present	Present	Present	Present
chr10	114808230	114808534	3268	intron	SNORA87	Present	Present	Present	Present
chr10	115301231	115301251	-9349	Intergenic	HABP2	Present	Present	Present	Present
chr10	115301385	115301533	-9131	Intergenic	HABP2	Present	Present	Present	Present
chr10	115511245	115511506	-66	promoter-TSS	PLEKHS1	Present	Present	Present	Present
chr10	115512882	115513078	1539	intron	PLEKHS1	Present	Present	Present	Present
chr10	116126955	116127267	37150	intron	AFAP1L2	Present	Present	Present	Present
chr10	116133940	116134375	30104	intron	AFAP1L2	Present	Present	Present	Present
chr10	119262801	119263059	-39026	intron	EMX2	Present	Present	Present	Present
chr10	120232412	120232547	115859	Intergenic	LINC00867	Present	Present	Present	Present
chr10	120674339	120674448	-114833	Intergenic	NANOS1	Present	Present	Present	Present
chr10	122856324	122856709	245642	Intergenic	WDR11	Present	Present	Present	Present
chr10	123069694	123070088	220937	Intergenic	FGFR2	Present	Present	Present	Present
chr10	123260318	123260511	30414	exon	FGFR2	Present	Present	Present	Present
chr10	123440528	123441099	-82841	Intergenic	FGFR2	Present	Present	Present	Present
chr10	123907256	123907518	-15758	intron	TACC2	Present	Present	Present	Present
chr10	123908189	123908264	-14919	intron	TACC2	Present	Present	Present	Present
chr10	124607718	124608180	-2576	TTS	CUZD1	Present	Present	Present	Present
chr10	126337416	126337691	-55044	intron	FAM53B-AS1	Present	Present	Present	Present
chr10	126337837	126337848	-54755	intron	FAM53B-AS1	Present	Present	Present	Present
chr10	127702075	127702394	-40392	3'UTR	FANK1-AS1	Present	Present	Present	Present
chr10	127751059	127751389	-89382	intron	FANK1-AS1	Present	Present	Present	Present
chr10	128038938	128039389	37883	intron	ADAM12	Present	Present	Present	Present
chr10	128061777	128062073	15121	intron	ADAM12	Present	Present	Present	Present
chr10	128062565	128062751	14388	intron	ADAM12	Present	Present	Present	Present
chr10	128086644	128086999	-9775	Intergenic	ADAM12	Present	Present	Present	Present
chr10	128947754	128948096	46930	intron	INSYN2A	Present	Present	Present	Present
chr10	128948630	128948767	46157	intron	INSYN2A	Present	Present	Present	Present
chr10	128951618	128951761	43166	intron	INSYN2A	Present	Present	Present	Present
chr10	129417918	129418295	70493	Intergenic	NPS	Present	Present	Present	Present
chr10	130096253	130096716	12270	intron	LINC01163	Present	Present	Present	Present
chr10	130117218	130117471	33130	Intergenic	LINC01163	Present	Present	Present	Present
chr10	135428002	135428196	12200	Intergenic	FRG2B	Present	Present	Present	Present
chr10	135429784	135430283	10266	Intergenic	FRG2B	Present	Present	Present	Present
chr10	135430409	135431033	9578	Intergenic	FRG2B	Present	Present	Present	Present
chr10	135432457	135432739	7701	Intergenic	FRG2B	Present	Present	Present	Present
chr11	2726284	2726493	-5160	intron	KCNQ1OT1	Present	Present	Present	Present
chr11	4725568	4725710	-6556	Intergenic	OR51E2	Present	Present	Present	Present
chr11	4903249	4903481	435	exon	OR51T1	Present	Present	Present	Present
chr11	8090453	8090735	9009	non-coding	TUB-AS1	Present	Present	Present	Present
chr11	8481410	8481557	134040	intron	STK33	Present	Present	Present	Present
chr11	8552959	8553274	62407	intron	STK33	Present	Present	Present	Present
chr11	8721446	8721807	14640	intron	SNORA3B	Present	Present	Present	Present
chr11	8939068	8939313	6454	intron	AKIP1	Present	Present	Present	Present
chr11	9781437	9781473	-375	promoter-TSS	LINC02709	Present	Present	Present	Present
chr11	9786928	9787133	-5950	intron	LINC02709	Present	Present	Present	Present
chr11	9787221	9787513	-6287	intron	LINC02709	Present	Present	Present	Present
chr11	10373227	10373649	43578	intron	CAND1.11	Present	Present	Present	Present
chr11	10419269	10419424	-52522	intron	AMPD3	Present	Present	Present	Present
chr11	10476414	10476684	-262	promoter-TSS	AMPD3	Present	Present	Present	Present
chr11	10921592	10921636	41850	Intergenic	ZBED5-AS1	Present	Present	Present	Present
chr11	10928089	10928326	48443	Intergenic	ZBED5-AS1	Present	Present	Present	Present
chr11	11371595	11371876	3062	intron	CSNK2A3	Present	Present	Present	Present
chr11	11449004	11449038	-74224	intron	CSNK2A3	Present	Present	Present	Present
chr11	11449144	11449460	-74505	intron	CSNK2A3	Present	Present	Present	Present
chr11	11483199	11483388	-108496	intron	CSNK2A3	Present	Present	Present	Present
chr11	11484971	11485190	-110283	intron	CSNK2A3	Present	Present	Present	Present
chr11	11556474	11556794	86918	intron	GALNT18	Present	Present	Present	Present
chr11	12000764	12001184	29212	intron	DKK3	Present	Present	Present	Present
chr11	12201229	12201463	16116	intron	MIR6124	Present	Present	Present	Present
chr11	12204299	12204592	19215	intron	MIR6124	Present	Present	Present	Present
chr11	12207515	12207760	22407	intron	MIR6124	Present	Present	Present	Present
chr11	12269944	12270189	-38381	intron	MICALCL	Present	Present	Present	Present
chr11	12341032	12341040	32589	intron	MICALCL	Present	Present	Present	Present
chr11	13126690	13127071	96017	Intergenic	RASSF10	Present	Present	Present	Present
chr11	13853321	13853562	38722	intron	LINC02545	Present	Present	Present	Present
chr11	13872260	13872456	19805	intron	LINC02545	Present	Present	Present	Present
chr11	14436750	14436919	-50782	Intergenic	RRAS2	Present	Present	Present	Present
chr11	17670080	17670442	48225	Intergenic	LINC02729	Present	Present	Present	Present
chr11	17671647	17672470	46428	Intergenic	LINC02729	Present	Present	Present	Present
chr11	17673110	17673488	45187	Intergenic	LINC02729	Present	Present	Present	Present
chr11	17674241	17674272	44230	Intergenic	LINC02729	Present	Present	Present	Present
chr11	17674862	17675075	43518	Intergenic	LINC02729	Present	Present	Present	Present
chr11	17705023	17705309	13320	Intergenic	LINC02729	Present	Present	Present	Present
chr11	17707520	17707702	10875	Intergenic	LINC02729	Present	Present	Present	Present
chr11	17707831	17708149	10496	Intergenic	LINC02729	Present	Present	Present	Present
chr11	17709434	17709852	8843	Intergenic	LINC02729	Present	Present	Present	Present
chr11	17718388	17718428	78	promoter-TSS	LINC02729	Present	Present	Present	Present
chr11	17720771	17721649	-2724	Intergenic	LINC02729	Present	Present	Present	Present
chr11	19370895	19371292	-1178	Intergenic	NAV2	Present	Present	Present	Present
chr11	19374405	19374770	2316	intron	NAV2	Present	Present	Present	Present
chr11	19890053	19890283	-108539	intron	MIR4694	Present	Present	Present	Present
chr11	20035385	20035676	-8572	intron	NAV2	Present	Present	Present	Present
chr11	20044326	20044568	345	intron	NAV2	Present	Present	Present	Present
chr11	20281116	20281273	-99173	Intergenic	DBX1	Present	Present	Present	Present
chr11	20283299	20283580	-101418	Intergenic	DBX1	Present	Present	Present	Present
chr11	20297626	20297842	-87497	Intergenic	HTATIP2	Present	Present	Present	Present
chr11	20325171	20325451	-59920	Intergenic	HTATIP2	Present	Present	Present	Present
chr11	20330186	20330394	-54941	Intergenic	HTATIP2	Present	Present	Present	Present
chr11	22100661	22101043	-113779	Intergenic	ANO5	Present	Present	Present	Present
chr11	24953811	24954050	435331	intron	LUZP2	Present	Present	Present	Present
chr11	27231137	27231350	9072	intron	BBOX1-AS1	Present	Present	Present	Present
chr11	27237871	27238357	2201	intron	BBOX1-AS1	Present	Present	Present	Present
chr11	27255726	27256151	-14278	Intergenic	BBOX1-AS1	Present	Present	Present	Present
chr11	27389445	27389732	-4793	exon	CCDC34	Present	Present	Present	Present
chr11	27420061	27420190	-35330	intron	CCDC34	Present	Present	Present	Present
chr11	27567580	27567716	-31054	intron	MIR8087	Present	Present	Present	Present
chr11	27593168	27593319	-56649	intron	MIR8087	Present	Present	Present	Present
chr11	30444079	30444186	99481	intron	ARL14EP	Present	Present	Present	Present
chr11	30444902	30444943	100271	intron	ARL14EP	Present	Present	Present	Present
chr11	30446436	30446790	101962	intron	ARL14EP	Present	Present	Present	Present
chr11	30510126	30510266	91844	intron	MPPED2	Present	Present	Present	Present
chr11	30588680	30588868	13266	intron	MPPED2	Present	Present	Present	Present
chr11	32101162	32101294	-11392	Intergenic	RCN1	Present	Present	Present	Present
chr11	32102746	32103121	-9687	Intergenic	RCN1	Present	Present	Present	Present
chr11	33209649	33209734	26488	intron	CSTF3-DT	Present	Present	Present	Present
chr11	33679825	33680109	42319	intron	C11orf91	Present	Present	Present	Present
chr11	33824297	33824475	28141	Intergenic	FBXO3-DT	Present	Present	Present	Present
chr11	34367095	34367383	12318	intron	ABTB2	Present	Present	Present	Present
chr11	35173460	35173697	-10919	intron	SNORD164	Present	Present	Present	Present
chr11	35244951	35245196	60576	TTS	SNORD164	Present	Present	Present	Present
chr11	35343356	35343623	97616	intron	SLC1A2	Present	Present	Present	Present
chr11	35703884	35703973	19605	intron	TRIM44	Present	Present	Present	Present
chr11	35915503	35916047	-49756	Intergenic	LDLRAD3	Present	Present	Present	Present
chr11	35940740	35940943	-24690	Intergenic	LDLRAD3	Present	Present	Present	Present
chr11	36052275	36052598	20788	intron	MIR3973	Present	Present	Present	Present
chr11	36094885	36095280	4369	intron	LOC101928510	Present	Present	Present	Present
chr11	36145086	36145503	-45843	intron	LOC101928510	Present	Present	Present	Present
chr11	40350868	40351021	-36264	intron	LRRC4C	Present	Present	Present	Present
chr11	44264756	44264934	66844	intron	ALX4	Present	Present	Present	Present
chr11	44265285	44265484	66305	intron	ALX4	Present	Present	Present	Present
chr11	44268306	44268599	63237	3'UTR	ALX4	Present	Present	Present	Present
chr11	44291201	44291613	40282	intron	ALX4	Present	Present	Present	Present
chr11	44292504	44292771	39052	intron	ALX4	Present	Present	Present	Present
chr11	44590591	44591065	3615	intron	CD82	Present	Present	Present	Present
chr11	44622489	44622828	35445	intron	CD82	Present	Present	Present	Present
chr11	44630313	44630672	43279	intron	CD82	Present	Present	Present	Present
chr11	44645233	44645767	58287	Intergenic	CD82	Present	Present	Present	Present
chr11	44787922	44788045	39471	intron	TSPAN18	Present	Present	Present	Present
chr11	46385149	46385396	2116	intron	DGKZ	Present	Present	Present	Present
chr11	46722325	46722584	-127	promoter-TSS	ZNF408	Present	Present	Present	Present
chr11	47152159	47152382	46160	intron	ARFGAP2	Present	Present	Present	Present
chr11	47290865	47291062	37	promoter-TSS	MADD	Present	Present	Present	Present
chr11	47939283	47939448	-62746	Intergenic	PTPRJ	Present	Present	Present	Present
chr11	57056728	57056942	35591	Intergenic	TNKS1BP1	Present	Present	Present	Present
chr11	57060513	57061129	31605	Intergenic	TNKS1BP1	Present	Present	Present	Present
chr11	57546034	57546427	16956	intron	CTNND1	Present	Present	Present	Present
chr11	57546879	57547013	17672	intron	CTNND1	Present	Present	Present	Present
chr11	57742327	57742740	-48820	Intergenic	OR9Q1	Present	Present	Present	Present
chr11	59318025	59318167	35710	Intergenic	OR4D9	Present	Present	Present	Present
chr11	61418754	61419060	-28956	Intergenic	DAGLA	Present	Present	Present	Present
chr11	62785140	62785357	-1931	Intergenic	SLC22A8	Present	Present	Present	Present
chr11	63257422	63257649	1104	intron	PLAAT5	Present	Present	Present	Present
chr11	63729475	63729500	-12605	Intergenic	COX8A	Present	Present	Present	Present
chr11	64163547	64164110	27754	Intergenic	MIR1237	Present	Present	Present	Present
chr11	64173787	64174053	37846	Intergenic	MIR1237	Present	Present	Present	Present
chr11	65061411	65061698	-20783	intron	CDC42EP2	Present	Present	Present	Present
chr11	68180553	68180733	-47577	intron	PPP6R3	Present	Present	Present	Present
chr11	69064572	69064815	3071	TTS	MYEOV	Present	Present	Present	Present
chr11	69068819	69069432	7503	Intergenic	MYEOV	Present	Present	Present	Present
chr11	69169109	69169347	-71195	Intergenic	LOC102724265	Present	Present	Present	Present
chr11	71938785	71938853	3008	intron	INPPL1	Present	Present	Present	Present
chr11	75039530	75039825	6553	intron	MIR326	Present	Present	Present	Present
chr11	75067608	75067977	-5087	Intergenic	ARRB1	Present	Present	Present	Present
chr11	76003280	76003511	-85849	Intergenic	WNT11	Present	Present	Present	Present
chr11	76887266	76887361	48021	intron	MYO7A	Present	Present	Present	Present
chr11	79374162	79374347	-222180	Intergenic	TENM4	Present	Present	Present	Present
chr11	82700375	82700532	44863	intron	RAB30	Present	Present	Present	Present
chr11	82719028	82719241	26182	intron	RAB30	Present	Present	Present	Present
chr11	85430209	85430429	74	promoter-TSS	SYTL2	Present	Present	Present	Present
chr11	94509758	94509961	8337	intron	AMOTL1	Present	Present	Present	Present
chr11	96485933	96486240	244497	Intergenic	LINC02737	Present	Present	Present	Present
chr11	99187594	99187712	-239223	intron	CNTN5	Present	Present	Present	Present
chr11	100503859	100504082	-54049	Intergenic	ARHGAP42	Present	Present	Present	Present
chr11	102473972	102474182	21986	intron	MMP20	Present	Present	Present	Present
chr11	106492341	106492582	370327	Intergenic	LOC101928535	Present	Present	Present	Present
chr11	107535782	107536046	46868	exon	SLN	Present	Present	Present	Present
chr11	108541175	108541433	5508	intron	DDX10	Present	Present	Present	Present
chr11	108983572	108983790	-309235	Intergenic	C11orf87	Present	Present	Present	Present
chr11	109939893	109940388	-23978	Intergenic	ZC3H12C	Present	Present	Present	Present
chr11	110001445	110001586	37397	intron	ZC3H12C	Present	Present	Present	Present
chr11	110234012	110234242	8288	intron	LINC02732	Present	Present	Present	Present
chr11	110956848	110957066	11085	Intergenic	LINC02550	Present	Present	Present	Present
chr11	111298266	111298582	-9513	Intergenic	LOC100132078	Present	Present	Present	Present
chr11	112215729	112216775	74780	intron	LINC02762	Present	Present	Present	Present
chr11	112394400	112394618	32016	intron	LINC02764	Present	Present	Present	Present
chr11	112459098	112459351	-32699	Intergenic	LINC02764	Present	Present	Present	Present
chr11	112507694	112508158	-81401	Intergenic	LINC02764	Present	Present	Present	Present
chr11	112666267	112666583	-165717	Intergenic	NCAM1	Present	Present	Present	Present
chr11	112666692	112666918	-165337	Intergenic	NCAM1	Present	Present	Present	Present
chr11	112677161	112677275	-154924	Intergenic	NCAM1	Present	Present	Present	Present
chr11	112677368	112677371	-154773	Intergenic	NCAM1	Present	Present	Present	Present
chr11	112677538	112677852	-154447	Intergenic	NCAM1	Present	Present	Present	Present
chr11	112748951	112749359	-82987	Intergenic	NCAM1	Present	Present	Present	Present
chr11	113018124	113018336	126393	intron	NCAM1-AS1	Present	Present	Present	Present
chr11	113157734	113158137	-13312	Intergenic	NCAM1-AS1	Present	Present	Present	Present
chr11	113160287	113160516	-15778	Intergenic	NCAM1-AS1	Present	Present	Present	Present
chr11	113255392	113255577	-3017	Intergenic	ANKK1	Present	Present	Present	Present
chr11	113376723	113377126	-30804	Intergenic	DRD2	Present	Present	Present	Present
chr11	116088292	116088520	-421733	Intergenic	LINC02702	Present	Present	Present	Present
chr11	117050495	117050801	1189	intron	SIDT2	Present	Present	Present	Present
chr11	117092750	117092959	9935	intron	PCSK7	Present	Present	Present	Present
chr11	121762879	121763152	207537	Intergenic	MIR125B1	Present	Present	Present	Present
chr11	123321413	123321659	20559	intron	GRAMD1B	Present	Present	Present	Present
chr11	123670875	123671063	6088	Intergenic	OR6M1	Present	Present	Present	Present
chr11	123986050	123986237	-14	promoter-TSS	VWA5A	Present	Present	Present	Present
chr11	125134642	125134819	100083	intron	PKNOX2	Present	Present	Present	Present
chr11	125271493	125271673	-93527	intron	LOC403312	Present	Present	Present	Present
chr11	125971391	125971602	-38309	Intergenic	CDON	Present	Present	Present	Present
chr11	126000301	126000572	-67249	Intergenic	CDON	Present	Present	Present	Present
chr11	126002272	126002475	-69186	Intergenic	CDON	Present	Present	Present	Present
chr11	126004014	126004242	-70941	Intergenic	CDON	Present	Present	Present	Present
chr11	126009454	126009842	71897	Intergenic	RPUSD4	Present	Present	Present	Present
chr11	126417227	126417293	-105413	intron	LOC101929427	Present	Present	Present	Present
chr11	130545390	130545717	2702	intron	C11orf44	Present	Present	Present	Present
chr11	130607756	130607966	65010	Intergenic	C11orf44	Present	Present	Present	Present
chr11	130608072	130608351	65360	Intergenic	C11orf44	Present	Present	Present	Present
chr11	133990935	133991119	30231	intron	SNORD153	Present	Present	Present	Present
chr12	611342	611533	42332	intron	B4GALNT3	Present	Present	Present	Present
chr12	1283027	1283257	146228	intron	ERC1	Present	Present	Present	Present
chr12	3251486	3251811	65103	intron	TSPAN9	Present	Present	Present	Present
chr12	3260277	3260521	73854	intron	TSPAN9	Present	Present	Present	Present
chr12	3837427	3837719	24702	intron	CRACR2A	Present	Present	Present	Present
chr12	4147351	4147551	-164837	Intergenic	PARP11	Present	Present	Present	Present
chr12	4222229	4222524	-160552	Intergenic	CCND2	Present	Present	Present	Present
chr12	4227197	4227429	-155615	Intergenic	CCND2	Present	Present	Present	Present
chr12	4243140	4243393	-139662	Intergenic	CCND2	Present	Present	Present	Present
chr12	4354156	4354317	-28692	Intergenic	CCND2	Present	Present	Present	Present
chr12	4355392	4355604	-27430	Intergenic	CCND2	Present	Present	Present	Present
chr12	5676244	5676495	73071	intron	NTF3	Present	Present	Present	Present
chr12	6662351	6662682	2692	intron	IFFO1	Present	Present	Present	Present
chr12	8763876	8764042	1496	intron	AICDA	Present	Present	Present	Present
chr12	9287858	9288083	-19145	Intergenic	A2M	Present	Present	Present	Present
chr12	9493113	9493257	-26875	Intergenic	LINC02367	Present	Present	Present	Present
chr12	13376473	13376520	26836	Intergenic	EMP1	Present	Present	Present	Present
chr12	14410740	14410950	-107721	Intergenic	ATF7IP	Present	Present	Present	Present
chr12	17126201	17126485	-15338	Intergenic	SKP1P2	Present	Present	Present	Present
chr12	18210056	18210415	32892	Intergenic	RERGL	Present	Present	Present	Present
chr12	19555889	19556263	-36350	Intergenic	AEBP2	Present	Present	Present	Present
chr12	19728814	19729086	135417	Intergenic	AEBP2	Present	Present	Present	Present
chr12	20365684	20365974	-84994	Intergenic	LINC02468	Present	Present	Present	Present
chr12	26427684	26427923	79297	Intergenic	SSPN	Present	Present	Present	Present
chr12	27187766	27188122	12453	Intergenic	MED21	Present	Present	Present	Present
chr12	27674078	27674215	-2993	Intergenic	PPFIBP1	Present	Present	Present	Present
chr12	29700872	29701088	-48354	intron	OVCH1	Present	Present	Present	Present
chr12	29863089	29863340	73661	intron	TMTC1	Present	Present	Present	Present
chr12	29896829	29897039	39941	intron	TMTC1	Present	Present	Present	Present
chr12	30259134	30259511	-321630	Intergenic	TMTC1	Present	Present	Present	Present
chr12	31123704	31124013	44020	intron	TSPAN11	Present	Present	Present	Present
chr12	31387692	31387698	-33526	Intergenic	OVOS2	Present	Present	Present	Present
chr12	31388032	31388051	-33872	Intergenic	OVOS2	Present	Present	Present	Present
chr12	45342569	45342789	-34968	Intergenic	NELL2	Present	Present	Present	Present
chr12	46554347	46554660	105796	Intergenic	SLC38A1	Present	Present	Present	Present
chr12	46603859	46604175	56282	intron	SLC38A1	Present	Present	Present	Present
chr12	46694705	46695076	-32064	Intergenic	SLC38A1	Present	Present	Present	Present
chr12	46867534	46867695	89724	intron	LOC100288798	Present	Present	Present	Present
chr12	46918640	46918956	140908	intron	LOC100288798	Present	Present	Present	Present
chr12	47164289	47164491	55390	intron	SLC38A4	Present	Present	Present	Present
chr12	48214481	48214746	-927	promoter-TSS	HDAC7	Present	Present	Present	Present
chr12	48233072	48233249	-19474	Intergenic	HDAC7	Present	Present	Present	Present
chr12	48261968	48262131	36728	intron	VDR	Present	Present	Present	Present
chr12	50203151	50203489	18876	intron	NCKAP5L	Present	Present	Present	Present
chr12	50263032	50263335	-26294	3'UTR	BCDIN3D	Present	Present	Present	Present
chr12	50267232	50267246	-30350	intron	BCDIN3D	Present	Present	Present	Present
chr12	52586299	52586326	-514	promoter-TSS	KRT80	Present	Present	Present	Present
chr12	52654833	52655015	-2632	Intergenic	KRT87P	Present	Present	Present	Present
chr12	64492614	64492771	123384	intron	C12orf66	Present	Present	Present	Present
chr12	65894066	65894307	56905	intron	LOC105369187	Present	Present	Present	Present
chr12	65960174	65960213	-9102	intron	LOC105369187	Present	Present	Present	Present
chr12	65984211	65984421	-12333	intron	LINC02454	Present	Present	Present	Present
chr12	66181219	66181417	-36922	intron	HMGA2	Present	Present	Present	Present
chr12	66286790	66286990	-10785	intron	HMGA2-AS1	Present	Present	Present	Present
chr12	66290007	66290441	-14119	intron	HMGA2-AS1	Present	Present	Present	Present
chr12	66305180	66305416	-29193	intron	HMGA2-AS1	Present	Present	Present	Present
chr12	66342411	66342802	-66501	intron	HMGA2-AS1	Present	Present	Present	Present
chr12	66626112	66626355	-18629	intron	MIR6502	Present	Present	Present	Present
chr12	66634098	66634535	-10546	intron	MIR6502	Present	Present	Present	Present
chr12	67752587	67752777	83657	Intergenic	LINC02420	Present	Present	Present	Present
chr12	67752934	67753112	83316	Intergenic	LINC02420	Present	Present	Present	Present
chr12	68503539	68503847	49827	Intergenic	IFNG	Present	Present	Present	Present
chr12	69400987	69401240	-44093	Intergenic	CPM	Present	Present	Present	Present
chr12	69489555	69489780	-132647	Intergenic	CPM	Present	Present	Present	Present
chr12	70215769	70215928	-3159	non-coding	MYRFL	Present	Present	Present	Present
chr12	70278166	70278425	59288	intron	MYRFL	Present	Present	Present	Present
chr12	70280011	70280247	61122	intron	MYRFL	Present	Present	Present	Present
chr12	70290517	70290733	71618	intron	MYRFL	Present	Present	Present	Present
chr12	70291507	70291957	72725	intron	MYRFL	Present	Present	Present	Present
chr12	70294553	70294706	75622	intron	MYRFL	Present	Present	Present	Present
chr12	70385476	70385982	166722	Intergenic	MYRFL	Present	Present	Present	Present
chr12	70396388	70396674	177524	Intergenic	MYRFL	Present	Present	Present	Present
chr12	71247321	71247536	-64728	intron	PTPRR	Present	Present	Present	Present
chr12	76099829	76100042	-194546	Intergenic	KRR1	Present	Present	Present	Present
chr12	76118864	76119011	-213548	Intergenic	KRR1	Present	Present	Present	Present
chr12	76231580	76231771	193881	Intergenic	PHLDA1	Present	Present	Present	Present
chr12	77259961	77260127	12755	intron	CSRP2	Present	Present	Present	Present
chr12	89938470	89938838	-18615	Intergenic	POC1B-GALNT4	Present	Present	Present	Present
chr12	90177226	90177383	-74161	Intergenic	ATP2B1	Present	Present	Present	Present
chr12	90373976	90374220	32628	Intergenic	LINC02399	Present	Present	Present	Present
chr12	90547066	90547270	-139927	Intergenic	LINC02392	Present	Present	Present	Present
chr12	90647621	90647848	-39361	Intergenic	LINC02392	Present	Present	Present	Present
chr12	92428763	92428999	106608	intron	LINC01619	Present	Present	Present	Present
chr12	92757475	92757667	-57736	Intergenic	CLLU1	Present	Present	Present	Present
chr12	92860536	92860735	180	non-coding	LINC02397	Present	Present	Present	Present
chr12	92899184	92899413	38843	Intergenic	LINC02397	Present	Present	Present	Present
chr12	94636949	94637153	-19246	intron	PLXNC1	Present	Present	Present	Present
chr12	95107056	95107234	-62812	Intergenic	TMCC3	Present	Present	Present	Present
chr12	95108118	95108352	-63902	Intergenic	TMCC3	Present	Present	Present	Present
chr12	95779265	95779400	75633	Intergenic	MIR3685	Present	Present	Present	Present
chr12	96652459	96652682	3294	intron	ELK3	Present	Present	Present	Present
chr12	96746065	96746313	48028	intron	CDK17	Present	Present	Present	Present
chr12	98768028	98768209	82805	Intergenic	SLC9A7P1	Present	Present	Present	Present
chr12	98812108	98812823	38458	Intergenic	SLC9A7P1	Present	Present	Present	Present
chr12	98897333	98897428	253	intron	LINC02453	Present	Present	Present	Present
chr12	99213869	99214172	74532	intron	ANKS1B	Present	Present	Present	Present
chr12	102916679	102916897	-42447	Intergenic	IGF1	Present	Present	Present	Present
chr12	102933665	102934090	-59536	Intergenic	IGF1	Present	Present	Present	Present
chr12	104074435	104074815	93574	intron	STAB2	Present	Present	Present	Present
chr12	104194246	104194544	40617	intron	NT5DC3	Present	Present	Present	Present
chr12	104235824	104235959	-879	promoter-TSS	NT5DC3	Present	Present	Present	Present
chr12	104309199	104309470	14655	non-coding	TTC41P	Present	Present	Present	Present
chr12	104388125	104388274	28549	exon	TDG	Present	Present	Present	Present
chr12	105014877	105015114	29584	intron	MIR3922	Present	Present	Present	Present
chr12	105024225	105024465	38934	intron	MIR3922	Present	Present	Present	Present
chr12	105062087	105062519	76892	intron	MIR3922	Present	Present	Present	Present
chr12	105114313	105114444	128967	intron	MIR3922	Present	Present	Present	Present
chr12	105131429	105131725	146166	intron	MIR3922	Present	Present	Present	Present
chr12	105136344	105136392	150957	intron	MIR3922	Present	Present	Present	Present
chr12	106100103	106100299	-351	promoter-TSS	CASC18	Present	Present	Present	Present
chr12	106100573	106100714	91	promoter-TSS	CASC18	Present	Present	Present	Present
chr12	106477793	106478121	55854	intron	NUAK1	Present	Present	Present	Present
chr12	106517432	106517623	16284	intron	NUAK1	Present	Present	Present	Present
chr12	108962655	108962819	7498	non-coding	ISCU	Present	Present	Present	Present
chr12	108977655	108978052	14007	Intergenic	TMEM119	Present	Present	Present	Present
chr12	109085315	109085497	11368	intron	CORO1C	Present	Present	Present	Present
chr12	109198524	109198725	22703	intron	SSH1	Present	Present	Present	Present
chr12	109220084	109220186	1192	intron	SSH1	Present	Present	Present	Present
chr12	109232143	109232473	-1526	intron	MIR619	Present	Present	Present	Present
chr12	110386060	110386235	47765	3'UTR	TCHP	Present	Present	Present	Present
chr12	110386892	110387161	47147	intron	GIT2	Present	Present	Present	Present
chr12	110436074	110436248	-1074	Intergenic	ANKRD13A	Present	Present	Present	Present
chr12	110687022	110687389	-31847	Intergenic	ATP2A2	Present	Present	Present	Present
chr12	116561438	116561689	24896	intron	MIR620	Present	Present	Present	Present
chr12	116737548	116737780	-22673	Intergenic	MED13L	Present	Present	Present	Present
chr12	116784086	116784241	-69172	Intergenic	MED13L	Present	Present	Present	Present
chr12	119131928	119132416	67312	Intergenic	LINC02423	Present	Present	Present	Present
chr12	119268152	119268354	3088	intron	LINC02439	Present	Present	Present	Present
chr12	119870876	119871030	98419	intron	CCDC60	Present	Present	Present	Present
chr12	119878811	119879042	106392	intron	CCDC60	Present	Present	Present	Present
chr12	122326409	122326547	39	promoter-TSS	HPD	Present	Present	Present	Present
chr12	125014152	125014370	37897	intron	NCOR2	Present	Present	Present	Present
chr12	125140737	125140742	-88581	Intergenic	NCOR2	Present	Present	Present	Present
chr12	125172474	125172604	-120381	Intergenic	NCOR2	Present	Present	Present	Present
chr12	125204801	125204843	119395	Intergenic	SCARB1	Present	Present	Present	Present
chr12	125205044	125205091	119150	Intergenic	SCARB1	Present	Present	Present	Present
chr12	125205188	125205649	118799	Intergenic	SCARB1	Present	Present	Present	Present
chr12	125215071	125215267	109048	Intergenic	SCARB1	Present	Present	Present	Present
chr12	125219202	125219301	104966	Intergenic	SCARB1	Present	Present	Present	Present
chr12	125225309	125225403	98861	Intergenic	SCARB1	Present	Present	Present	Present
chr12	125230726	125230936	93386	Intergenic	SCARB1	Present	Present	Present	Present
chr12	125249314	125249899	74611	Intergenic	SCARB1	Present	Present	Present	Present
chr12	125408811	125408954	8789	Intergenic	MIR5188	Present	Present	Present	Present
chr12	132475360	132475561	-40309	intron	SNORA49	Present	Present	Present	Present
chr13	22148192	22148339	30044	intron	MICU2	Present	Present	Present	Present
chr13	22157710	22157938	20485	intron	MICU2	Present	Present	Present	Present
chr13	22257308	22257579	12231	intron	FGF9	Present	Present	Present	Present
chr13	22312795	22313275	67823	Intergenic	FGF9	Present	Present	Present	Present
chr13	22386370	22386875	65677	Intergenic	LINC00424	Present	Present	Present	Present
chr13	22586834	22587088	-134662	Intergenic	LINC00424	Present	Present	Present	Present
chr13	22683383	22683397	-101034	Intergenic	LINC00540	Present	Present	Present	Present
chr13	22684563	22684822	-99732	Intergenic	LINC00540	Present	Present	Present	Present
chr13	22742685	22742889	-41637	Intergenic	LINC00540	Present	Present	Present	Present
chr13	23025441	23025815	241204	Intergenic	LINC00540	Present	Present	Present	Present
chr13	23278042	23278319	194140	Intergenic	BASP1P1	Present	Present	Present	Present
chr13	23895659	23895834	53901	intron	SACS	Present	Present	Present	Present
chr13	24001408	24001668	6303	non-coding	SACS	Present	Present	Present	Present
chr13	24022260	24022517	-14547	Intergenic	SACS	Present	Present	Present	Present
chr13	24024534	24024770	-16811	Intergenic	SACS	Present	Present	Present	Present
chr13	24062568	24062953	19109	Intergenic	LINC00327	Present	Present	Present	Present
chr13	24144265	24144656	-49	promoter-TSS	TNFRSF19	Present	Present	Present	Present
chr13	24184416	24184577	30997	intron	TNFRSF19	Present	Present	Present	Present
chr13	24189951	24190109	36531	exon	TNFRSF19	Present	Present	Present	Present
chr13	24230911	24231075	77494	intron	TNFRSF19	Present	Present	Present	Present
chr13	24297148	24297295	143722	Intergenic	TNFRSF19	Present	Present	Present	Present
chr13	24364719	24364908	-98194	intron	PCOTH	Present	Present	Present	Present
chr13	24365145	24365326	-97772	intron	PCOTH	Present	Present	Present	Present
chr13	24559989	24560303	6205	intron	SPATA13	Present	Present	Present	Present
chr13	24612801	24612840	58879	intron	SPATA13	Present	Present	Present	Present
chr13	24613018	24613184	59160	intron	SPATA13	Present	Present	Present	Present
chr13	24613278	24613526	59461	intron	SPATA13	Present	Present	Present	Present
chr13	26204440	26204685	161650	intron	ATP8A2	Present	Present	Present	Present
chr13	26223465	26223689	180665	intron	ATP8A2	Present	Present	Present	Present
chr13	26262784	26263051	220005	intron	ATP8A2	Present	Present	Present	Present
chr13	26266172	26266648	223498	intron	ATP8A2	Present	Present	Present	Present
chr13	26455994	26456400	169001	intron	SHISA2	Present	Present	Present	Present
chr13	26496594	26497083	128360	intron	SHISA2	Present	Present	Present	Present
chr13	26519901	26520032	105232	intron	SHISA2	Present	Present	Present	Present
chr13	26547225	26547647	77762	intron	SHISA2	Present	Present	Present	Present
chr13	26596762	26597207	28214	3'UTR	SHISA2	Present	Present	Present	Present
chr13	26626541	26626793	-1469	non-coding	SHISA2	Present	Present	Present	Present
chr13	27032479	27032819	-99171	Intergenic	WASF3	Present	Present	Present	Present
chr13	27033460	27034202	-97989	Intergenic	WASF3	Present	Present	Present	Present
chr13	27034776	27035145	-96860	Intergenic	WASF3	Present	Present	Present	Present
chr13	27488846	27489145	-154072	Intergenic	GPR12	Present	Present	Present	Present
chr13	27538921	27539087	-160666	Intergenic	USP12-AS1	Present	Present	Present	Present
chr13	27540015	27540461	-159432	Intergenic	USP12-AS1	Present	Present	Present	Present
chr13	27581539	27581682	-118060	Intergenic	USP12-AS1	Present	Present	Present	Present
chr13	28892646	28892953	176466	intron	FLT1	Present	Present	Present	Present
chr13	29063644	29063913	5487	intron	FLT1	Present	Present	Present	Present
chr13	29142528	29142706	-73352	Intergenic	FLT1	Present	Present	Present	Present
chr13	29282353	29282521	10670	intron	SLC46A3	Present	Present	Present	Present
chr13	29304827	29304984	-11755	Intergenic	SLC46A3	Present	Present	Present	Present
chr13	29327790	29327939	-34714	Intergenic	SLC46A3	Present	Present	Present	Present
chr13	29958704	29958985	-43953	intron	MTUS2	Present	Present	Present	Present
chr13	30009459	30009670	6767	intron	MTUS2	Present	Present	Present	Present
chr13	30015261	30015877	12772	intron	MTUS2	Present	Present	Present	Present
chr13	30022300	30022727	19716	intron	MTUS2	Present	Present	Present	Present
chr13	30024019	30024235	21330	intron	MTUS2	Present	Present	Present	Present
chr13	30071214	30071893	-9666	intron	MTUS2-AS1	Present	Present	Present	Present
chr13	30074565	30074818	-12804	intron	MTUS2-AS1	Present	Present	Present	Present
chr13	30081644	30081833	-19851	Intergenic	MTUS2-AS1	Present	Present	Present	Present
chr13	30082365	30082530	-20560	Intergenic	MTUS2-AS1	Present	Present	Present	Present
chr13	30147403	30147622	22313	intron	SLC7A1	Present	Present	Present	Present
chr13	30476543	30476824	-14141	Intergenic	LINC00297	Present	Present	Present	Present
chr13	30497875	30498030	2836	intron	LINC00572	Present	Present	Present	Present
chr13	31264684	31265022	-22762	Intergenic	ALOX5AP	Present	Present	Present	Present
chr13	31304642	31304809	-4920	intron	ALOX5AP	Present	Present	Present	Present
chr13	31311169	31311206	1542	intron	ALOX5AP	Present	Present	Present	Present
chr13	31311699	31311972	2190	intron	ALOX5AP	Present	Present	Present	Present
chr13	31320445	31320838	10996	intron	ALOX5AP	Present	Present	Present	Present
chr13	31322960	31323176	13423	intron	ALOX5AP	Present	Present	Present	Present
chr13	31324235	31324401	14673	intron	ALOX5AP	Present	Present	Present	Present
chr13	31366327	31366717	-10821	Intergenic	LINC00398	Present	Present	Present	Present
chr13	31366806	31367113	-10384	Intergenic	LINC00398	Present	Present	Present	Present
chr13	31379837	31380052	2601	intron	LINC00398	Present	Present	Present	Present
chr13	31403378	31404513	26602	Intergenic	LINC00398	Present	Present	Present	Present
chr13	31407215	31407512	30020	Intergenic	LINC00398	Present	Present	Present	Present
chr13	31409742	31409974	32515	Intergenic	LINC00398	Present	Present	Present	Present
chr13	31436869	31437075	-19727	Intergenic	LINC00545	Present	Present	Present	Present
chr13	31438619	31438837	-17971	Intergenic	LINC00545	Present	Present	Present	Present
chr13	31439457	31439810	-17066	Intergenic	LINC00545	Present	Present	Present	Present
chr13	31440957	31441196	-15623	Intergenic	LINC00545	Present	Present	Present	Present
chr13	31444134	31444471	-12397	Intergenic	LINC00545	Present	Present	Present	Present
chr13	31620821	31621546	114390	Intergenic	TEX26	Present	Present	Present	Present
chr13	31783272	31783804	9426	intron	B3GLCT	Present	Present	Present	Present
chr13	32460203	32460384	39373	intron	EEF1DP3	Present	Present	Present	Present
chr13	32470559	32470897	49808	intron	EEF1DP3	Present	Present	Present	Present
chr13	32519364	32519571	86309	intron	FRY-AS1	Present	Present	Present	Present
chr13	32519907	32520041	85802	intron	FRY-AS1	Present	Present	Present	Present
chr13	32738774	32739044	132998	intron	FRY	Present	Present	Present	Present
chr13	32835765	32836093	50162	exon	ZAR1L	Present	Present	Present	Present
chr13	32890052	32890262	540	intron	BRCA2	Present	Present	Present	Present
chr13	33514826	33515129	-29187	Intergenic	LINC00423	Present	Present	Present	Present
chr13	33700351	33700606	59750	intron	STARD13	Present	Present	Present	Present
chr13	33711979	33712057	48210	intron	STARD13	Present	Present	Present	Present
chr13	33713355	33713605	46748	intron	STARD13	Present	Present	Present	Present
chr13	33803173	33803442	-23120	intron	STARD13	Present	Present	Present	Present
chr13	33803646	33804289	-23780	intron	STARD13	Present	Present	Present	Present
chr13	33834526	33834788	-17034	intron	STARD13-AS	Present	Present	Present	Present
chr13	33859715	33860107	-19	promoter-TSS	STARD13	Present	Present	Present	Present
chr13	33926707	33926996	-17448	intron	LINC02344	Present	Present	Present	Present
chr13	34088662	34088858	162171	intron	STARD13	Present	Present	Present	Present
chr13	34092682	34092908	158136	intron	STARD13	Present	Present	Present	Present
chr13	34094389	34094536	156469	intron	STARD13	Present	Present	Present	Present
chr13	34094661	34094984	156109	intron	STARD13	Present	Present	Present	Present
chr13	34185110	34185530	65611	intron	STARD13	Present	Present	Present	Present
chr13	36341834	36341950	70028	TTS	LINC00445	Present	Present	Present	Present
chr13	36342207	36342575	70527	TTS	LINC00445	Present	Present	Present	Present
chr13	36359672	36360013	69962	intron	DCLK1	Present	Present	Present	Present
chr13	36386860	36387079	42835	intron	DCLK1	Present	Present	Present	Present
chr13	36737951	36738154	-31976	Intergenic	DCLK1	Present	Present	Present	Present
chr13	36766386	36766621	22190	intron	SOHLH2	Present	Present	Present	Present
chr13	36919826	36920144	546	promoter-TSS	SPART	Present	Present	Present	Present
chr13	36994701	36994909	-11162	Intergenic	CCNA1	Present	Present	Present	Present
chr13	37213663	37213900	-34376	Intergenic	SERTM1	Present	Present	Present	Present
chr13	37332591	37332895	-60596	Intergenic	RFXAP	Present	Present	Present	Present
chr13	37493395	37493470	943	intron	SMAD9	Present	Present	Present	Present
chr13	39092459	39092840	-49212	Intergenic	LINC00366	Present	Present	Present	Present
chr13	39260521	39260703	200	promoter-TSS	LINC00437	Present	Present	Present	Present
chr13	39554007	39554498	10716	5'UTR	STOML3	Present	Present	Present	Present
chr13	39675577	39675708	63049	Intergenic	NHLRC3	Present	Present	Present	Present
chr13	39680199	39681041	68027	Intergenic	NHLRC3	Present	Present	Present	Present
chr13	39827913	39828088	215407	Intergenic	NHLRC3	Present	Present	Present	Present
chr13	40806522	40806695	-11969	Intergenic	LINC00548	Present	Present	Present	Present
chr13	40807791	40808308	-13410	Intergenic	LINC00548	Present	Present	Present	Present
chr13	40809321	40809570	-14806	Intergenic	LINC00548	Present	Present	Present	Present
chr13	40945678	40946156	109226	intron	LINC00598	Present	Present	Present	Present
chr13	40976634	40976803	78425	intron	LINC00598	Present	Present	Present	Present
chr13	41015466	41015711	39555	intron	LINC00598	Present	Present	Present	Present
chr13	41030634	41030993	24330	intron	LINC00598	Present	Present	Present	Present
chr13	41163875	41164067	76807	intron	FOXO1	Present	Present	Present	Present
chr13	41567260	41567448	-10319	intron	ELF1	Present	Present	Present	Present
chr13	41821336	41821707	16191	intron	MTRF1	Present	Present	Present	Present
chr13	42120585	42120785	21846	Intergenic	MIR5006	Present	Present	Present	Present
chr13	42136310	42136477	6138	Intergenic	MIR5006	Present	Present	Present	Present
chr13	43877368	43877449	-145580	intron	ENOX1-AS2	Present	Present	Present	Present
chr13	43881793	43882335	-140924	intron	ENOX1-AS2	Present	Present	Present	Present
chr13	43891140	43891508	-131664	intron	ENOX1-AS2	Present	Present	Present	Present
chr13	45505432	45505654	58063	Intergenic	NUFIP1	Present	Present	Present	Present
chr13	45899938	45900216	10505	Intergenic	SNORA31B	Present	Present	Present	Present
chr13	45904100	45904138	6463	Intergenic	SNORA31B	Present	Present	Present	Present
chr13	46355692	46356175	69955	3'UTR	SIAH3	Present	Present	Present	Present
chr13	46919481	46919798	41748	exon	RUBCNL	Present	Present	Present	Present
chr13	47145467	47145782	18319	intron	LRCH1	Present	Present	Present	Present
chr13	47150161	47150333	22942	intron	LRCH1	Present	Present	Present	Present
chr13	50656657	50656749	398	promoter-TSS	DLEU1	Present	Present	Present	Present
chr13	50931821	50932066	169642	intron	DLEU1-AS1	Present	Present	Present	Present
chr13	50960726	50960891	140777	intron	DLEU1-AS1	Present	Present	Present	Present
chr13	50961292	50961577	140151	intron	DLEU1-AS1	Present	Present	Present	Present
chr13	50967879	50968097	133597	intron	DLEU1-AS1	Present	Present	Present	Present
chr13	51103568	51103745	-2071	TTS	DLEU1-AS1	Present	Present	Present	Present
chr13	51182599	51182772	-81100	Intergenic	DLEU1-AS1	Present	Present	Present	Present
chr13	51330448	51330555	-51490	intron	DLEU7-AS1	Present	Present	Present	Present
chr13	51885542	51885703	-29546	Intergenic	SERPINE3	Present	Present	Present	Present
chr13	51889869	51890181	-25143	Intergenic	SERPINE3	Present	Present	Present	Present
chr13	52188692	52188876	30186	intron	WDFY2	Present	Present	Present	Present
chr13	52194436	52195022	36131	intron	WDFY2	Present	Present	Present	Present
chr13	52360260	52360600	17868	intron	DHRS12	Present	Present	Present	Present
chr13	53499361	53499795	-76803	Intergenic	PCDH8	Present	Present	Present	Present
chr13	53499915	53500118	-77241	Intergenic	PCDH8	Present	Present	Present	Present
chr13	53504062	53504312	-81412	Intergenic	PCDH8	Present	Present	Present	Present
chr13	59930777	59931166	-655881	Intergenic	DIAPH3-AS1	Present	Present	Present	Present
chr13	59983407	59983576	-603361	Intergenic	DIAPH3-AS1	Present	Present	Present	Present
chr13	73833116	73833465	200147	Intergenic	KLF5	Present	Present	Present	Present
chr13	73842566	73842815	209547	Intergenic	KLF5	Present	Present	Present	Present
chr13	74340203	74340494	201967	intron	LINC00392	Present	Present	Present	Present
chr13	74862724	74863026	57294	Intergenic	LINC00402	Present	Present	Present	Present
chr13	75368394	75368548	241491	Intergenic	LINC00347	Present	Present	Present	Present
chr13	76259545	76259725	49169	intron	LMO7	Present	Present	Present	Present
chr13	76279187	76279294	-55216	intron	LMO7	Present	Present	Present	Present
chr13	76362822	76363097	28162	intron	LMO7	Present	Present	Present	Present
chr13	76800009	76800228	-290850	Intergenic	LINC00561	Present	Present	Present	Present
chr13	77903307	77903689	-2269	Intergenic	MYCBP2	Present	Present	Present	Present
chr13	78942296	78942441	-227889	intron	LOC780529	Present	Present	Present	Present
chr13	78946721	78946875	-223459	intron	LOC780529	Present	Present	Present	Present
chr13	79532269	79532439	-118169	Intergenic	LINC00331	Present	Present	Present	Present
chr13	80233420	80233607	92651	Intergenic	LINC01068	Present	Present	Present	Present
chr13	80324425	80324574	-54022	Intergenic	LINC01038	Present	Present	Present	Present
chr13	80357046	80357359	-21319	Intergenic	LINC01038	Present	Present	Present	Present
chr13	80370339	80370560	-8072	Intergenic	LINC01038	Present	Present	Present	Present
chr13	80623013	80623202	37895	Intergenic	LINC01080	Present	Present	Present	Present
chr13	83033811	83033940	-1232757	Intergenic	LINC00564	Present	Present	Present	Present
chr13	87776414	87776615	212339	Intergenic	LINC00430	Present	Present	Present	Present
chr13	95923498	95923705	30099	intron	ABCC4	Present	Present	Present	Present
chr13	97876393	97876548	1883	intron	MBNL2	Present	Present	Present	Present
chr13	97971346	97971600	96886	intron	MBNL2	Present	Present	Present	Present
chr13	99133385	99133557	40908	intron	STK24	Present	Present	Present	Present
chr13	99133991	99134121	40323	intron	STK24	Present	Present	Present	Present
chr13	99582447	99582749	47720	intron	DOCK9	Present	Present	Present	Present
chr13	100715700	100715787	25454	Intergenic	LOC105370333	Present	Present	Present	Present
chr13	106644132	106644363	285068	Intergenic	LINC00343	Present	Present	Present	Present
chr13	106648978	106649152	289886	Intergenic	LINC00343	Present	Present	Present	Present
chr13	106650218	106650579	291219	Intergenic	LINC00343	Present	Present	Present	Present
chr13	107638497	107638775	332408	Intergenic	LINC00443	Present	Present	Present	Present
chr13	110918398	110918637	40987	intron	COL4A1	Present	Present	Present	Present
chr13	111001692	111001857	8469	intron	MIR8073	Present	Present	Present	Present
chr13	111029567	111029811	36384	intron	MIR8073	Present	Present	Present	Present
chr13	111064570	111064811	50944	intron	COL4A2-AS2	Present	Present	Present	Present
chr13	111191041	111191230	22934	intron	RAB20	Present	Present	Present	Present
chr13	111522659	111522779	-64	promoter-TSS	LINC00346	Present	Present	Present	Present
chr13	111698985	111699282	-49052	Intergenic	LINC00368	Present	Present	Present	Present
chr13	111820620	111820759	14676	intron	ARHGEF7	Present	Present	Present	Present
chr13	114103396	114103729	-89	promoter-TSS	ADPRHL1	Present	Present	Present	Present
chr14	21081469	21081653	-22579	Intergenic	RNASE12	Present	Present	Present	Present
chr14	21149722	21149955	-2498	Intergenic	ANG	Present	Present	Present	Present
chr14	21151405	21151654	-807	promoter-TSS	ANG	Present	Present	Present	Present
chr14	21507269	21507479	-3147	intron	RNASE7	Present	Present	Present	Present
chr14	23290166	23290267	-1196	Intergenic	SLC7A7	Present	Present	Present	Present
chr14	23540868	23541087	-199	promoter-TSS	ACIN1	Present	Present	Present	Present
chr14	23907891	23908043	-3098	Intergenic	MYH7	Present	Present	Present	Present
chr14	24836273	24836595	317	promoter-TSS	NFATC4	Present	Present	Present	Present
chr14	25578058	25578497	-58774	Intergenic	STXBP6	Present	Present	Present	Present
chr14	25580650	25580799	-61221	Intergenic	STXBP6	Present	Present	Present	Present
chr14	25591002	25591208	-71602	Intergenic	STXBP6	Present	Present	Present	Present
chr14	32431256	32431439	17288	Intergenic	LINC02313	Present	Present	Present	Present
chr14	32777190	32777299	-21260	Intergenic	AKAP6	Present	Present	Present	Present
chr14	32887493	32887640	89062	intron	AKAP6	Present	Present	Present	Present
chr14	32941775	32941941	143354	intron	AKAP6	Present	Present	Present	Present
chr14	32978892	32979270	180577	intron	AKAP6	Present	Present	Present	Present
chr14	33197149	33197345	-210838	intron	NPAS3	Present	Present	Present	Present
chr14	33456102	33456270	48101	intron	NPAS3	Present	Present	Present	Present
chr14	34500369	34500485	-80147	Intergenic	EGLN3	Present	Present	Present	Present
chr14	34508033	34508195	-87834	Intergenic	EGLN3	Present	Present	Present	Present
chr14	34823736	34823941	107608	Intergenic	SPTSSA	Present	Present	Present	Present
chr14	38875126	38875312	-149921	Intergenic	CLEC14A	Present	Present	Present	Present
chr14	39086212	39086375	-265506	Intergenic	LOC105370457	Present	Present	Present	Present
chr14	55999710	55999794	47058	Intergenic	KTN1-AS1	Present	Present	Present	Present
chr14	59130326	59130508	24862	Intergenic	DACT1	Present	Present	Present	Present
chr14	59281947	59282185	-12940	Intergenic	LINC01500	Present	Present	Present	Present
chr14	59628475	59628720	-26788	Intergenic	DAAM1	Present	Present	Present	Present
chr14	61570685	61570943	-122406	Intergenic	TRMT5	Present	Present	Present	Present
chr14	61615390	61615442	132640	Intergenic	TMEM30B	Present	Present	Present	Present
chr14	61669920	61670184	78004	Intergenic	TMEM30B	Present	Present	Present	Present
chr14	68610106	68610564	320026	intron	RAD51B	Present	Present	Present	Present
chr14	68711413	68711545	384025	intron	LOC100996664	Present	Present	Present	Present
chr14	68911646	68911845	183759	intron	LOC100996664	Present	Present	Present	Present
chr14	68925634	68926056	169659	intron	LOC100996664	Present	Present	Present	Present
chr14	68989876	68990121	105506	intron	LOC100996664	Present	Present	Present	Present
chr14	69015279	69015463	80133	intron	LOC100996664	Present	Present	Present	Present
chr14	69015587	69015968	79727	intron	LOC100996664	Present	Present	Present	Present
chr14	69017942	69018242	77412	intron	LOC100996664	Present	Present	Present	Present
chr14	69019027	69019186	76398	intron	LOC100996664	Present	Present	Present	Present
chr14	69030267	69031074	64834	intron	LOC100996664	Present	Present	Present	Present
chr14	69060852	69061062	34547	intron	LOC100996664	Present	Present	Present	Present
chr14	69063412	69063756	31920	TTS	LOC100996664	Present	Present	Present	Present
chr14	69066915	69067267	28413	intron	LOC100996664	Present	Present	Present	Present
chr14	69078881	69079202	16463	TTS	LOC100996664	Present	Present	Present	Present
chr14	69099800	69100682	-4737	intron	LOC100996664	Present	Present	Present	Present
chr14	69101098	69101150	-5620	intron	LOC100996664	Present	Present	Present	Present
chr14	69121411	69121483	-25943	intron	LOC100996664	Present	Present	Present	Present
chr14	69224475	69224891	35948	Intergenic	ZFP36L1	Present	Present	Present	Present
chr14	69273501	69273644	-10612	Intergenic	ZFP36L1	Present	Present	Present	Present
chr14	69273771	69274402	-11126	Intergenic	ZFP36L1	Present	Present	Present	Present
chr14	69281220	69281485	-18392	Intergenic	ZFP36L1	Present	Present	Present	Present
chr14	69406736	69407167	39068	intron	ACTN1	Present	Present	Present	Present
chr14	69408685	69408863	37245	intron	ACTN1	Present	Present	Present	Present
chr14	72178314	72178463	125373	intron	SIPA1L1	Present	Present	Present	Present
chr14	74247233	74247395	6597	intron	ELMSAN1	Present	Present	Present	Present
chr14	74607185	74607416	55644	intron	LIN52	Present	Present	Present	Present
chr14	75709249	75709415	-36199	Intergenic	FOS	Present	Present	Present	Present
chr14	75716183	75716425	-29227	Intergenic	FOS	Present	Present	Present	Present
chr14	76114763	76115032	12322	TTS	ERG28	Present	Present	Present	Present
chr14	77186820	77186997	-40903	Intergenic	VASH1	Present	Present	Present	Present
chr14	77441500	77441664	15601	Intergenic	LINC01629	Present	Present	Present	Present
chr14	77510476	77510838	3265	intron	LINC02288	Present	Present	Present	Present
chr14	79483203	79483606	-182921	intron	LOC105370586	Present	Present	Present	Present
chr14	79933400	79933679	187816	intron	NRXN3	Present	Present	Present	Present
chr14	80682287	80682406	-3825	5'UTR	DIO2	Present	Present	Present	Present
chr14	80932031	80932418	-234824	Intergenic	DIO2	Present	Present	Present	Present
chr14	81916377	81916719	-47	promoter-TSS	LINC02308	Present	Present	Present	Present
chr14	85881747	85881922	21575	intron	LINC00911	Present	Present	Present	Present
chr14	90091471	90091919	-6186	Intergenic	FOXN3	Present	Present	Present	Present
chr14	91075524	91075858	-33282	intron	LOC101928909	Present	Present	Present	Present
chr14	91107548	91107815	-1292	intron	LOC101928909	Present	Present	Present	Present
chr14	91112289	91112719	3531	intron	LOC101928909	Present	Present	Present	Present
chr14	91164926	91165164	1368	non-coding	LOC105370622	Present	Present	Present	Present
chr14	95685312	95685417	-61017	intron	DICER1	Present	Present	Present	Present
chr14	95693727	95693955	-69494	intron	DICER1	Present	Present	Present	Present
chr14	95731926	95732058	54253	intron	CLMN	Present	Present	Present	Present
chr14	95963284	95963589	-21264	Intergenic	SYNE3	Present	Present	Present	Present
chr14	95963950	95964235	-21920	Intergenic	SYNE3	Present	Present	Present	Present
chr14	96570959	96571209	65385	Intergenic	C14orf132	Present	Present	Present	Present
chr14	99148532	99148760	-29304	Intergenic	C14orf177	Present	Present	Present	Present
chr14	99374209	99374398	196353	Intergenic	C14orf177	Present	Present	Present	Present
chr14	99374724	99374934	196879	Intergenic	C14orf177	Present	Present	Present	Present
chr14	99513851	99514073	224572	Intergenic	BCL11B	Present	Present	Present	Present
chr14	99514271	99514468	224165	Intergenic	BCL11B	Present	Present	Present	Present
chr14	101282329	101282464	1568	Intergenic	MIR2392	Present	Present	Present	Present
chr14	104616747	104617018	11822	intron	KIF26A	Present	Present	Present	Present
chr14	105798795	105798906	-16936	intron	BRF1	Present	Present	Present	Present
chr15	21913454	21913758	27133	Intergenic	LOC646214	Present	Present	Present	Present
chr15	21916046	21916450	24491	Intergenic	LOC646214	Present	Present	Present	Present
chr15	21925896	21926030	14776	Intergenic	LOC646214	Present	Present	Present	Present
chr15	22446170	22446708	2442	Intergenic	IGHV1OR15-1	Present	Present	Present	Present
chr15	26147059	26147283	-336	promoter-TSS	LINC02346	Present	Present	Present	Present
chr15	31558747	31558977	-35797	Intergenic	LOC283710	Present	Present	Present	Present
chr15	31566946	31567175	-43995	Intergenic	LOC283710	Present	Present	Present	Present
chr15	31802324	31802472	183360	intron	KLF13	Present	Present	Present	Present
chr15	33323737	33323953	36530	intron	FMN1	Present	Present	Present	Present
chr15	33418793	33419065	-58554	intron	FMN1	Present	Present	Present	Present
chr15	33615986	33616078	12864	intron	RYR3	Present	Present	Present	Present
chr15	33694913	33695179	91878	intron	RYR3	Present	Present	Present	Present
chr15	34517032	34517229	-87	promoter-TSS	EMC4	Present	Present	Present	Present
chr15	34635158	34635544	11	promoter-TSS	NOP10	Present	Present	Present	Present
chr15	34993782	34994030	-45941	Intergenic	LINC02252	Present	Present	Present	Present
chr15	35014241	35014804	32677	Intergenic	GJD2	Present	Present	Present	Present
chr15	35017863	35018178	29179	Intergenic	GJD2	Present	Present	Present	Present
chr15	35089201	35089369	-1535	intron	ACTC1	Present	Present	Present	Present
chr15	35091513	35092312	-4162	intron	ACTC1	Present	Present	Present	Present
chr15	35261939	35262165	-109	promoter-TSS	AQR	Present	Present	Present	Present
chr15	35280634	35280738	-198	promoter-TSS	ZNF770	Present	Present	Present	Present
chr15	39169755	39169927	181042	Intergenic		Present	Present	Present	Present
chr15	39171213	39171452	182533	Intergenic		Present	Present	Present	Present
chr15	39233645	39234040	245043	Intergenic		Present	Present	Present	Present
chr15	39387750	39387917	-155037	Intergenic	C15orf54	Present	Present	Present	Present
chr15	39432219	39432421	-110550	Intergenic	C15orf54	Present	Present	Present	Present
chr15	39464153	39464448	-78570	Intergenic	C15orf54	Present	Present	Present	Present
chr15	39464853	39465391	-77748	Intergenic	C15orf54	Present	Present	Present	Present
chr15	39505787	39505953	-37000	Intergenic	C15orf54	Present	Present	Present	Present
chr15	39655556	39655694	112755	Intergenic	C15orf54	Present	Present	Present	Present
chr15	39804240	39804424	-68948	Intergenic	THBS1	Present	Present	Present	Present
chr15	39848813	39848824	-24462	Intergenic	THBS1	Present	Present	Present	Present
chr15	40028936	40029184	45982	intron	FSIP1	Present	Present	Present	Present
chr15	40337891	40338128	6497	intron	SRP14-AS1	Present	Present	Present	Present
chr15	40385666	40385981	12464	intron	BMF	Present	Present	Present	Present
chr15	40390984	40391306	7142	intron	BMF	Present	Present	Present	Present
chr15	40395388	40395498	2844	intron	BMF	Present	Present	Present	Present
chr15	40397039	40397245	1145	intron	BMF	Present	Present	Present	Present
chr15	40442442	40442689	-10645	Intergenic	BUB1B	Present	Present	Present	Present
chr15	41849931	41850100	-1395	Intergenic	TYRO3	Present	Present	Present	Present
chr15	41954122	41954217	1559	intron	MGA	Present	Present	Present	Present
chr15	42192330	42192517	-6172	3'UTR	SPTBN5	Present	Present	Present	Present
chr15	42221523	42221639	7966	TTS	EHD4-AS1	Present	Present	Present	Present
chr15	42232594	42232904	19134	intron	EHD4-AS1	Present	Present	Present	Present
chr15	42236602	42236780	23076	intron	EHD4-AS1	Present	Present	Present	Present
chr15	42240086	42240262	24581	intron	EHD4	Present	Present	Present	Present
chr15	42357326	42357560	-14542	Intergenic	PLA2G4E	Present	Present	Present	Present
chr15	45625811	45625984	44845	Intergenic	GATM	Present	Present	Present	Present
chr15	55845258	55845526	35151	intron	PYGO1	Present	Present	Present	Present
chr15	57724720	57724929	56121	intron	CGNL1	Present	Present	Present	Present
chr15	57801322	57801780	-82551	intron	GCOM1	Present	Present	Present	Present
chr15	57802898	57803230	-81038	intron	GCOM1	Present	Present	Present	Present
chr15	57846622	57846990	-37296	Intergenic	GCOM1	Present	Present	Present	Present
chr15	57847510	57847707	-36494	Intergenic	GCOM1	Present	Present	Present	Present
chr15	57943610	57943987	-54921	intron	POLR2M	Present	Present	Present	Present
chr15	57988423	57988621	-10197	intron	POLR2M	Present	Present	Present	Present
chr15	58023169	58023403	24374	Intergenic	POLR2M	Present	Present	Present	Present
chr15	58112426	58112688	113645	Intergenic	POLR2M	Present	Present	Present	Present
chr15	58463824	58463903	33283	intron	AQP9	Present	Present	Present	Present
chr15	58516342	58516499	85840	Intergenic	AQP9	Present	Present	Present	Present
chr15	58624172	58624754	-99727	Intergenic	LIPC	Present	Present	Present	Present
chr15	58732698	58732888	8603	intron	LIPC	Present	Present	Present	Present
chr15	58739515	58739813	15474	intron	LIPC	Present	Present	Present	Present
chr15	58746196	58746988	22402	intron	LIPC	Present	Present	Present	Present
chr15	58751782	58752322	27862	intron	LIPC	Present	Present	Present	Present
chr15	58765137	58765253	25739	intron	LIPC-AS1	Present	Present	Present	Present
chr15	58767733	58768029	23053	intron	LIPC-AS1	Present	Present	Present	Present
chr15	58783733	58783836	7150	intron	LIPC-AS1	Present	Present	Present	Present
chr15	58784859	58785180	5915	intron	LIPC-AS1	Present	Present	Present	Present
chr15	58785392	58785579	5449	intron	LIPC-AS1	Present	Present	Present	Present
chr15	58803422	58803798	-12676	intron	LIPC-AS1	Present	Present	Present	Present
chr15	58805882	58806324	-15169	intron	LIPC-AS1	Present	Present	Present	Present
chr15	58841261	58841845	-50619	intron	LIPC-AS1	Present	Present	Present	Present
chr15	59739936	59739960	9563	intron	FAM81A	Present	Present	Present	Present
chr15	60643225	60643512	46817	intron	ANXA2	Present	Present	Present	Present
chr15	60666902	60667150	23159	intron	ANXA2	Present	Present	Present	Present
chr15	60685320	60685553	4749	intron	ANXA2	Present	Present	Present	Present
chr15	62785249	62785467	150130	Intergenic	MIR6085	Present	Present	Present	Present
chr15	62937633	62937804	-338	promoter-TSS	MGC15885	Present	Present	Present	Present
chr15	62939766	62939954	350	intron	TLN2	Present	Present	Present	Present
chr15	62976329	62976801	37055	intron	TLN2	Present	Present	Present	Present
chr15	63220547	63220829	104532	Intergenic	MIR190A	Present	Present	Present	Present
chr15	63477527	63477689	-4197	Intergenic	RAB8B	Present	Present	Present	Present
chr15	63902476	63902707	-9565	intron	USP3-AS1	Present	Present	Present	Present
chr15	64814051	64814329	22571	intron	ZNF609	Present	Present	Present	Present
chr15	67305942	67306081	50509	intron	LOC102723493	Present	Present	Present	Present
chr15	67306182	67306393	50233	intron	LOC102723493	Present	Present	Present	Present
chr15	67316580	67316688	39886	intron	LOC102723493	Present	Present	Present	Present
chr15	67316798	67317129	39557	intron	LOC102723493	Present	Present	Present	Present
chr15	67356542	67356596	-49	promoter-TSS	LOC102723493	Present	Present	Present	Present
chr15	67438667	67438829	8389	intron	SMAD3	Present	Present	Present	Present
chr15	69409754	69410201	36787	Intergenic	EWSAT1	Present	Present	Present	Present
chr15	69832776	69833197	-21073	Intergenic	DRAIC	Present	Present	Present	Present
chr15	70153244	70153821	25959	Intergenic	LINC00593	Present	Present	Present	Present
chr15	70186324	70186441	58809	Intergenic	LINC00593	Present	Present	Present	Present
chr15	70384819	70384871	2283	intron	TLE3	Present	Present	Present	Present
chr15	71903842	71904029	64360	intron	THSD4	Present	Present	Present	Present
chr15	71904940	71905027	65408	intron	THSD4	Present	Present	Present	Present
chr15	71927040	71927085	56816	intron	THSD4-AS2	Present	Present	Present	Present
chr15	71927201	71927455	56550	intron	THSD4-AS2	Present	Present	Present	Present
chr15	72045030	72045261	-57749	intron	NR2E3	Present	Present	Present	Present
chr15	72098798	72099114	-3938	Intergenic	NR2E3	Present	Present	Present	Present
chr15	74501556	74501854	-334	promoter-TSS	STRA6	Present	Present	Present	Present
chr15	75343539	75344000	8142	TTS	PPCDC	Present	Present	Present	Present
chr15	75357976	75358225	22473	Intergenic	PPCDC	Present	Present	Present	Present
chr15	75470001	75470194	-24126	Intergenic	C15orf39	Present	Present	Present	Present
chr15	77389901	77390138	-26568	Intergenic	TSPAN3	Present	Present	Present	Present
chr15	78102854	78102933	8901	intron	LINGO1	Present	Present	Present	Present
chr15	78316410	78316896	-30086	exon	LOC91450	Present	Present	Present	Present
chr15	78359679	78360072	10119	intron	TBC1D2B	Present	Present	Present	Present
chr15	78497642	78497717	29228	intron	ACSBG1	Present	Present	Present	Present
chr15	78499046	78499272	27748	intron	ACSBG1	Present	Present	Present	Present
chr15	80325749	80326154	-25959	Intergenic	ZFAND6	Present	Present	Present	Present
chr15	81823808	81823977	-157338	Intergenic	TMC3	Present	Present	Present	Present
chr15	82206997	82207543	131089	Intergenic	MEX3B	Present	Present	Present	Present
chr15	82439590	82439671	58695	intron	LINC01583	Present	Present	Present	Present
chr15	86022648	86022909	98944	intron	AKAP13	Present	Present	Present	Present
chr15	88266500	88266750	146465	Intergenic	LINC00052	Present	Present	Present	Present
chr15	88668866	88669035	80255	intron	NTRK3	Present	Present	Present	Present
chr15	89028128	89028350	17300	Intergenic	MRPS11	Present	Present	Present	Present
chr15	89631084	89631220	-535	promoter-TSS	ABHD2	Present	Present	Present	Present
chr15	93064912	93065061	50079	Intergenic	C15orf32	Present	Present	Present	Present
chr15	93081467	93081649	33935	Intergenic	LINC00930	Present	Present	Present	Present
chr15	93084506	93085123	30679	Intergenic	LINC00930	Present	Present	Present	Present
chr15	93160674	93161224	38056	3'UTR	FAM174B	Present	Present	Present	Present
chr15	93166541	93167091	32189	intron	FAM174B	Present	Present	Present	Present
chr15	93167679	93168224	31054	intron	FAM174B	Present	Present	Present	Present
chr15	93173653	93173819	25269	intron	FAM174B	Present	Present	Present	Present
chr15	93180938	93181242	17915	intron	FAM174B	Present	Present	Present	Present
chr15	93181553	93181803	17327	intron	FAM174B	Present	Present	Present	Present
chr15	93193506	93193667	5419	intron	FAM174B	Present	Present	Present	Present
chr15	93197458	93197631	1461	intron	FAM174B	Present	Present	Present	Present
chr15	93210510	93210844	-11672	Intergenic	FAM174B	Present	Present	Present	Present
chr15	93344687	93344855	6057	Intergenic	ASB9P1	Present	Present	Present	Present
chr15	93375004	93375308	36442	Intergenic	ASB9P1	Present	Present	Present	Present
chr15	93383030	93383234	-42941	Intergenic	LINC01578	Present	Present	Present	Present
chr15	93425441	93425612	-547	promoter-TSS	LINC01578	Present	Present	Present	Present
chr15	93443296	93443779	-17	promoter-TSS	CHD2	Present	Present	Present	Present
chr15	93461229	93461401	13686	intron	MIR3175	Present	Present	Present	Present
chr15	93580637	93581170	35482	3'UTR	RGMA	Present	Present	Present	Present
chr15	93631126	93631307	536	intron	RGMA	Present	Present	Present	Present
chr15	93709095	93709247	-40124	Intergenic	LOC105370980	Present	Present	Present	Present
chr15	93760644	93760833	11443	Intergenic	LOC105370980	Present	Present	Present	Present
chr15	93808283	93808823	59258	Intergenic	LOC105370980	Present	Present	Present	Present
chr15	93925583	93925908	176450	Intergenic	LOC105370980	Present	Present	Present	Present
chr15	94063507	94063755	314336	Intergenic	LOC105370980	Present	Present	Present	Present
chr15	94097047	94097148	-302692	Intergenic	LINC02207	Present	Present	Present	Present
chr15	94130514	94130694	-269185	Intergenic	LINC02207	Present	Present	Present	Present
chr15	94201735	94201902	-197971	Intergenic	LINC02207	Present	Present	Present	Present
chr15	94350185	94350338	-49528	Intergenic	LINC02207	Present	Present	Present	Present
chr15	94408950	94409129	9250	intron	LINC02207	Present	Present	Present	Present
chr15	94523500	94523724	79682	intron	LINC01580	Present	Present	Present	Present
chr15	94533045	94533206	89195	intron	LINC01580	Present	Present	Present	Present
chr15	94613665	94613934	37368	intron	LINC01581	Present	Present	Present	Present
chr15	94986520	94986662	87432	intron	MCTP2	Present	Present	Present	Present
chr15	95150627	95150781	-247888	Intergenic	LOC440311	Present	Present	Present	Present
chr15	95215089	95215301	-183397	Intergenic	LOC440311	Present	Present	Present	Present
chr15	95220361	95221217	-177803	Intergenic	LOC440311	Present	Present	Present	Present
chr15	95633092	95633354	234631	Intergenic	LOC440311	Present	Present	Present	Present
chr15	95770187	95770357	100057	Intergenic	LINC01197	Present	Present	Present	Present
chr15	95790456	95790650	79776	Intergenic	LINC01197	Present	Present	Present	Present
chr15	95802782	95802961	67458	Intergenic	LINC01197	Present	Present	Present	Present
chr15	95803251	95803575	66916	Intergenic	LINC01197	Present	Present	Present	Present
chr15	95828320	95828467	41936	intron	LINC01197	Present	Present	Present	Present
chr15	95831104	95831322	39116	intron	LINC01197	Present	Present	Present	Present
chr15	95836105	95836423	34065	intron	LINC01197	Present	Present	Present	Present
chr15	95840102	95840317	30120	intron	LINC01197	Present	Present	Present	Present
chr15	95847021	95847313	23162	intron	LINC01197	Present	Present	Present	Present
chr15	96386534	96387036	284285	Intergenic	LOC105369212	Present	Present	Present	Present
chr15	96474227	96474591	196661	Intergenic	LOC105369212	Present	Present	Present	Present
chr15	96483756	96484193	187096	Intergenic	LOC105369212	Present	Present	Present	Present
chr15	96579900	96580206	91017	Intergenic	LOC105369212	Present	Present	Present	Present
chr15	96597100	96597270	73885	Intergenic	LOC105369212	Present	Present	Present	Present
chr15	96828558	96828777	-40608	non-coding	NR2F2	Present	Present	Present	Present
chr15	96869962	96870207	263	intron	NR2F2-AS1	Present	Present	Present	Present
chr15	96873317	96873519	-511	promoter-TSS	NR2F2	Present	Present	Present	Present
chr15	98667192	98667416	-35322	Intergenic	LINC01582	Present	Present	Present	Present
chr15	99062378	99062578	-4913	Intergenic	FAM169B	Present	Present	Present	Present
chr15	99190298	99190527	-1356	non-coding	IGF1R	Present	Present	Present	Present
chr15	99243853	99244100	-49526	intron	IRAIN	Present	Present	Present	Present
chr15	99261756	99261918	-65818	intron	MIR4714	Present	Present	Present	Present
chr15	99320015	99320432	-7432	intron	MIR4714	Present	Present	Present	Present
chr15	99322916	99323196	-4599	intron	MIR4714	Present	Present	Present	Present
chr15	99343922	99344129	16370	intron	MIR4714	Present	Present	Present	Present
chr15	99344545	99344747	16991	intron	MIR4714	Present	Present	Present	Present
chr15	99396528	99396702	68960	intron	MIR4714	Present	Present	Present	Present
chr15	99497810	99497969	50996	intron	PGPEP1L	Present	Present	Present	Present
chr15	99560408	99560617	2579	intron	LUNAR1	Present	Present	Present	Present
chr15	99605358	99605403	-39906	Intergenic	SYNM	Present	Present	Present	Present
chr15	99619968	99620143	-25231	Intergenic	SYNM	Present	Present	Present	Present
chr15	99663892	99664416	18868	intron	SYNM	Present	Present	Present	Present
chr15	99791296	99791430	67	promoter-TSS	TTC23	Present	Present	Present	Present
chr15	99846390	99846572	48751	intron	HSP90B2P	Present	Present	Present	Present
chr15	99847013	99847160	49356	intron	HSP90B2P	Present	Present	Present	Present
chr15	99988133	99988265	-117423	Intergenic	MEF2A	Present	Present	Present	Present
chr15	100047636	100048172	-57718	Intergenic	MEF2A	Present	Present	Present	Present
chr15	100052294	100052693	-53129	Intergenic	MEF2A	Present	Present	Present	Present
chr15	100105924	100106118	-112	promoter-TSS	MEF2A	Present	Present	Present	Present
chr15	100248847	100249054	24692	intron	LYSMD4	Present	Present	Present	Present
chr15	100257549	100258009	15863	Intergenic	LYSMD4	Present	Present	Present	Present
chr15	100258800	100258998	14743	Intergenic	LYSMD4	Present	Present	Present	Present
chr15	100517059	100517368	169985	intron	LOC400464	Present	Present	Present	Present
chr15	100523660	100523980	176592	intron	LOC400464	Present	Present	Present	Present
chr15	100527060	100527227	179915	intron	LOC400464	Present	Present	Present	Present
chr15	100656692	100656913	225378	intron	ADAMTS17	Present	Present	Present	Present
chr15	100671821	100671959	210290	intron	ADAMTS17	Present	Present	Present	Present
chr15	100847602	100848011	34374	intron	ADAMTS17	Present	Present	Present	Present
chr15	101203398	101203472	60641	Intergenic	ASB7	Present	Present	Present	Present
chr15	101300094	101300221	-89800	Intergenic	LOC105369201	Present	Present	Present	Present
chr15	101303661	101304344	-85955	Intergenic	LOC105369201	Present	Present	Present	Present
chr15	101305327	101305772	-84408	Intergenic	LOC105369201	Present	Present	Present	Present
chr15	101306099	101306128	-83844	Intergenic	LOC105369201	Present	Present	Present	Present
chr15	101306466	101306783	-83333	Intergenic	LOC105369201	Present	Present	Present	Present
chr15	101403934	101404425	2131	intron	LOC105369201	Present	Present	Present	Present
chr15	101440733	101440954	18645	exon	LOC101927751	Present	Present	Present	Present
chr15	101442645	101443230	16551	intron	LOC101927751	Present	Present	Present	Present
chr15	101656328	101656586	135796	Intergenic	CHSY1	Present	Present	Present	Present
chr15	101667888	101667893	124363	Intergenic	CHSY1	Present	Present	Present	Present
chr15	101668121	101668233	124076	Intergenic	CHSY1	Present	Present	Present	Present
chr15	101668431	101668656	123710	Intergenic	CHSY1	Present	Present	Present	Present
chr15	101696832	101697015	95330	Intergenic	CHSY1	Present	Present	Present	Present
chr15	101718937	101719064	73253	exon	CHSY1	Present	Present	Present	Present
chr15	101723823	101724031	68326	intron	CHSY1	Present	Present	Present	Present
chr15	101728258	101728405	63922	intron	CHSY1	Present	Present	Present	Present
chr15	101741713	101742013	50390	intron	CHSY1	Present	Present	Present	Present
chr15	101818482	101818655	-878	promoter-TSS	SELENOS	Present	Present	Present	Present
chr15	101979693	101979866	50131	intron	PCSK6	Present	Present	Present	Present
chr16	1025115	1025271	-4194	TTS	LMF1	Present	Present	Present	Present
chr16	3207023	3207198	12818	Intergenic	CASP16P	Present	Present	Present	Present
chr16	4460662	4461100	5017	intron	CORO7	Present	Present	Present	Present
chr16	4993231	4993441	-6187	Intergenic	PPL	Present	Present	Present	Present
chr16	5266010	5266250	-118309	Intergenic	EEF2KMT	Present	Present	Present	Present
chr16	7133298	7133458	-249468	intron	RBFOX1	Present	Present	Present	Present
chr16	7401639	7402148	19047	intron	RBFOX1	Present	Present	Present	Present
chr16	7448669	7448673	65825	intron	RBFOX1	Present	Present	Present	Present
chr16	8811815	8812057	-2634	intron	ABAT	Present	Present	Present	Present
chr16	8812523	8812557	-2030	intron	ABAT	Present	Present	Present	Present
chr16	8812898	8812931	-1656	intron	ABAT	Present	Present	Present	Present
chr16	8814323	8814465	-176	promoter-TSS	ABAT	Present	Present	Present	Present
chr16	12637293	12637600	-176732	intron	MIR4718	Present	Present	Present	Present
chr16	13874814	13874885	-139165	Intergenic	ERCC4	Present	Present	Present	Present
chr16	13923966	13924040	-90011	Intergenic	ERCC4	Present	Present	Present	Present
chr16	14051268	14051751	37495	Intergenic	ERCC4	Present	Present	Present	Present
chr16	14380161	14380432	-15849	Intergenic	MIR193BHG	Present	Present	Present	Present
chr16	15604204	15604525	8241	intron	BMERB1	Present	Present	Present	Present
chr16	15684861	15685051	19996	Intergenic	MIR6506	Present	Present	Present	Present
chr16	19113599	19113757	-11576	Intergenic	ITPRIPL2	Present	Present	Present	Present
chr16	19947205	19947221	-50257	Intergenic	GPRC5B	Present	Present	Present	Present
chr16	20177891	20178094	-92892	Intergenic	GPR139	Present	Present	Present	Present
chr16	22231204	22231309	13657	intron	EEF2K	Present	Present	Present	Present
chr16	22231449	22231567	13909	intron	EEF2K	Present	Present	Present	Present
chr16	23515832	23515948	5925	intron	GGA2	Present	Present	Present	Present
chr16	27233878	27234093	18689	TTS	KDM8	Present	Present	Present	Present
chr16	27254206	27254634	-25106	intron	NSMCE1-DT	Present	Present	Present	Present
chr16	27338782	27338910	13551	intron	IL4R	Present	Present	Present	Present
chr16	27413200	27413280	-255	promoter-TSS	IL21R	Present	Present	Present	Present
chr16	27414387	27414606	1001	exon	IL21R	Present	Present	Present	Present
chr16	27730104	27730464	66	promoter-TSS	LOC100128079	Present	Present	Present	Present
chr16	27732958	27733339	-2798	intron	LOC100128079	Present	Present	Present	Present
chr16	31076405	31076743	-165	promoter-TSS	ZNF668	Present	Present	Present	Present
chr16	32606723	32607182	-54512	Intergenic	LOC105369266	Present	Present	Present	Present
chr16	46684252	46684402	-29036	Intergenic	SHCBP1	Present	Present	Present	Present
chr16	49598874	49599074	-46478	intron	ADAM3B	Present	Present	Present	Present
chr16	50293275	50293761	-6944	Intergenic	ADCY7	Present	Present	Present	Present
chr16	52469542	52469827	111371	TTS	TOX3	Present	Present	Present	Present
chr16	52597737	52597896	-16102	intron	TOX3	Present	Present	Present	Present
chr16	54408000	54408021	-3399	Intergenic	LINC02140	Present	Present	Present	Present
chr16	55435019	55435257	61071	Intergenic	MMP2-AS1	Present	Present	Present	Present
chr16	55440567	55440973	55439	Intergenic	MMP2-AS1	Present	Present	Present	Present
chr16	55536847	55537170	-5976	intron	LPCAT2	Present	Present	Present	Present
chr16	56749127	56749346	-14805	Intergenic	NUP93	Present	Present	Present	Present
chr16	56895102	56895581	2911	Intergenic	MIR138-2	Present	Present	Present	Present
chr16	56943419	56943678	5372	intron	MIR6863	Present	Present	Present	Present
chr16	57850154	57850530	5793	3'UTR	LOC388282	Present	Present	Present	Present
chr16	64899121	64899283	256764	Intergenic	CDH11	Present	Present	Present	Present
chr16	64944356	64944593	211492	Intergenic	CDH11	Present	Present	Present	Present
chr16	66262617	66263048	-137762	Intergenic	CDH5	Present	Present	Present	Present
chr16	66285101	66285277	-115405	Intergenic	CDH5	Present	Present	Present	Present
chr16	66361005	66361220	-39482	Intergenic	CDH5	Present	Present	Present	Present
chr16	66369727	66369954	-30754	Intergenic	CDH5	Present	Present	Present	Present
chr16	66508897	66509012	1351	intron	BEAN1-AS1	Present	Present	Present	Present
chr16	66550805	66550960	33143	intron	TK2	Present	Present	Present	Present
chr16	66614687	66614934	1444	intron	CMTM2	Present	Present	Present	Present
chr16	68676746	68676944	-2368	Intergenic	CDH3	Present	Present	Present	Present
chr16	68820675	68820831	49558	intron	CDH1	Present	Present	Present	Present
chr16	69458146	69458217	-317	promoter-TSS	CYB5B	Present	Present	Present	Present
chr16	69516580	69516769	58176	Intergenic	CYB5B	Present	Present	Present	Present
chr16	70721117	70721201	-1203	TTS	MTSS2	Present	Present	Present	Present
chr16	70734778	70734859	-14862	intron	MTSS2	Present	Present	Present	Present
chr16	70735058	70735245	-15195	intron	MTSS2	Present	Present	Present	Present
chr16	70749247	70749572	-29453	intron	MTSS2	Present	Present	Present	Present
chr16	70769585	70769994	-19209	intron	VAC14-AS1	Present	Present	Present	Present
chr16	70812947	70813216	21980	intron	VAC14	Present	Present	Present	Present
chr16	71961835	71962023	32495	3'UTR	IST1	Present	Present	Present	Present
chr16	72995022	72995360	86836	intron	ZFHX3	Present	Present	Present	Present
chr16	73019614	73019783	62329	intron	ZFHX3	Present	Present	Present	Present
chr16	73398833	73399260	-21658	Intergenic	LINC01568	Present	Present	Present	Present
chr16	75121109	75121437	29397	intron	LDHD	Present	Present	Present	Present
chr16	78539862	78540104	406432	intron	WWOX	Present	Present	Present	Present
chr16	78571527	78571752	438088	intron	WWOX	Present	Present	Present	Present
chr16	78717902	78718546	584673	intron	WWOX	Present	Present	Present	Present
chr16	78782378	78782717	648996	intron	WWOX	Present	Present	Present	Present
chr16	79018948	79019118	615601	intron	MAF	Present	Present	Present	Present
chr16	79321079	79321537	313326	Intergenic	MAF	Present	Present	Present	Present
chr16	79635729	79635853	-1157	Intergenic	MAF	Present	Present	Present	Present
chr16	79674962	79675187	-40440	Intergenic	MAF	Present	Present	Present	Present
chr16	79687283	79687529	-52772	Intergenic	MAF	Present	Present	Present	Present
chr16	79690753	79690946	-56215	Intergenic	MAF	Present	Present	Present	Present
chr16	79692367	79692575	-57837	Intergenic	MAF	Present	Present	Present	Present
chr16	79724937	79725352	-79224	Intergenic	LINC01229	Present	Present	Present	Present
chr16	79732252	79732431	-72027	Intergenic	LINC01229	Present	Present	Present	Present
chr16	79826947	79827120	-2113	intron	LINC01229	Present	Present	Present	Present
chr16	80061049	80061275	232016	Intergenic	LINC01229	Present	Present	Present	Present
chr16	82667630	82668021	7251	intron	CDH13	Present	Present	Present	Present
chr16	82687593	82687769	27107	intron	CDH13	Present	Present	Present	Present
chr16	82694610	82694812	-27825	intron	MIR8058	Present	Present	Present	Present
chr16	83748933	83749094	88568	intron	LOC102724163	Present	Present	Present	Present
chr16	83751464	83751698	86000	intron	LOC102724163	Present	Present	Present	Present
chr16	83766221	83766479	71231	intron	LOC102724163	Present	Present	Present	Present
chr16	83947115	83947171	14423	intron	MLYCD	Present	Present	Present	Present
chr16	84912116	84912270	58602	intron	CRISPLD2	Present	Present	Present	Present
chr16	84956027	84956869	88693	Intergenic	ZDHHC7	Present	Present	Present	Present
chr16	85158221	85158601	-12333	Intergenic	FAM92B	Present	Present	Present	Present
chr16	85160141	85160442	-10465	Intergenic	LINC02139	Present	Present	Present	Present
chr16	85160605	85160910	-9999	Intergenic	LINC02139	Present	Present	Present	Present
chr16	85170011	85170152	-675	promoter-TSS	LINC02139	Present	Present	Present	Present
chr16	85384638	85384826	-44801	Intergenic	MIR5093	Present	Present	Present	Present
chr16	85577251	85577410	-67685	Intergenic	GSE1	Present	Present	Present	Present
chr16	85587872	85587969	-57095	Intergenic	GSE1	Present	Present	Present	Present
chr16	85603209	85603522	-41650	Intergenic	GSE1	Present	Present	Present	Present
chr16	85603729	85603782	-41260	Intergenic	GSE1	Present	Present	Present	Present
chr16	85749004	85749350	26129	intron	MIR1910	Present	Present	Present	Present
chr16	86229687	86229970	41	promoter-TSS	LINC01082	Present	Present	Present	Present
chr16	86388431	86388456	-9158	Intergenic	LINC00917	Present	Present	Present	Present
chr16	86556325	86556602	12330	Intergenic	FOXF1	Present	Present	Present	Present
chr16	86806213	86806505	50662	Intergenic	LINC02188	Present	Present	Present	Present
chr16	86825422	86825569	69798	Intergenic	LINC02188	Present	Present	Present	Present
chr16	86917931	86918229	162383	Intergenic	LINC02188	Present	Present	Present	Present
chr16	86926146	86926366	-165134	Intergenic	LINC02181	Present	Present	Present	Present
chr16	86965032	86965184	-126282	Intergenic	LINC02181	Present	Present	Present	Present
chr16	86985493	86985649	-105819	Intergenic	LINC02181	Present	Present	Present	Present
chr16	87028314	87028420	-63023	Intergenic	LINC02181	Present	Present	Present	Present
chr16	87080794	87081024	-10481	Intergenic	LINC02181	Present	Present	Present	Present
chr16	87828061	87828258	-15405	Intergenic	LOC102724467	Present	Present	Present	Present
chr16	87856341	87856510	11841	Intergenic	MIR6775	Present	Present	Present	Present
chr16	88576834	88576977	20556	intron	LOC100128882	Present	Present	Present	Present
chr16	88797088	88797451	-319	promoter-TSS	LOC100289580	Present	Present	Present	Present
chr16	90098429	90099155	-2483	intron	GAS8-AS1	Present	Present	Present	Present
chr17	3862621	3862909	4966	intron	ATP2A3	Present	Present	Present	Present
chr17	5430185	5430445	-25989	intron	LOC728392	Present	Present	Present	Present
chr17	5589616	5589761	-85866	Intergenic	LOC339166	Present	Present	Present	Present
chr17	5673126	5673382	-2300	Intergenic	LOC339166	Present	Present	Present	Present
chr17	5673474	5673490	-2072	Intergenic	LOC339166	Present	Present	Present	Present
chr17	6457949	6458053	1874	intron	PITPNM3	Present	Present	Present	Present
chr17	7740156	7740434	-2929	Intergenic	KDM6B	Present	Present	Present	Present
chr17	9103140	9103449	-20859	intron	LOC101928266	Present	Present	Present	Present
chr17	9103548	9103843	-21260	intron	LOC101928266	Present	Present	Present	Present
chr17	10287490	10287785	1188	intron	MYHAS	Present	Present	Present	Present
chr17	13479373	13479643	25738	intron	HS3ST3A1	Present	Present	Present	Present
chr17	14701084	14701449	-216856	Intergenic	LOC101928475	Present	Present	Present	Present
chr17	15160705	15160973	3298	intron	PMP22	Present	Present	Present	Present
chr17	15301681	15301901	-56877	Intergenic	TEKT3	Present	Present	Present	Present
chr17	15316030	15316239	54801	Intergenic	CDRT4	Present	Present	Present	Present
chr17	15334379	15334897	36297	Intergenic	CDRT4	Present	Present	Present	Present
chr17	15337557	15337807	33253	Intergenic	CDRT4	Present	Present	Present	Present
chr17	15337974	15338313	32792	Intergenic	CDRT4	Present	Present	Present	Present
chr17	15339871	15340390	30805	non-coding	CDRT4	Present	Present	Present	Present
chr17	15348243	15348439	22594	intron	CDRT4	Present	Present	Present	Present
chr17	15360600	15361157	10057	intron	CDRT4	Present	Present	Present	Present
chr17	15366798	15367150	3961	intron	CDRT4	Present	Present	Present	Present
chr17	15372601	15372863	1418	TTS	CDRT3	Present	Present	Present	Present
chr17	15393999	15394153	-19926	intron	CDRT3	Present	Present	Present	Present
chr17	15394255	15394535	-20245	intron	CDRT3	Present	Present	Present	Present
chr17	15554791	15555248	31246	5'UTR	TRIM16	Present	Present	Present	Present
chr17	15814281	15814506	-33838	Intergenic	ADORA2B	Present	Present	Present	Present
chr17	15824043	15824521	-23949	Intergenic	ADORA2B	Present	Present	Present	Present
chr17	15829495	15829716	-18626	Intergenic	ADORA2B	Present	Present	Present	Present
chr17	15859530	15859767	11417	intron	ADORA2B	Present	Present	Present	Present
chr17	16389997	16390276	5371	intron	LRRC75A	Present	Present	Present	Present
chr17	16391843	16392138	3517	intron	LRRC75A	Present	Present	Present	Present
chr17	16415428	16415905	-20159	Intergenic	LRRC75A	Present	Present	Present	Present
chr17	16944437	16944647	-1229	Intergenic	MPRIP	Present	Present	Present	Present
chr17	17288780	17289428	82417	Intergenic	NT5M	Present	Present	Present	Present
chr17	17307194	17307432	-73001	Intergenic	MED9	Present	Present	Present	Present
chr17	17321241	17321516	-58936	Intergenic	MED9	Present	Present	Present	Present
chr17	17349436	17349656	-30768	Intergenic	MED9	Present	Present	Present	Present
chr17	17781277	17781568	-41097	intron	SREBF1	Present	Present	Present	Present
chr17	17803963	17804416	-63864	intron	SREBF1	Present	Present	Present	Present
chr17	17817249	17817450	58365	intron	TOM1L2	Present	Present	Present	Present
chr17	19235790	19236000	11992	intron	MIR1180	Present	Present	Present	Present
chr17	19303199	19303349	-11271	Intergenic	RNF112	Present	Present	Present	Present
chr17	19392807	19392989	-44269	Intergenic	SLC47A1	Present	Present	Present	Present
chr17	19411362	19411576	-25698	Intergenic	SLC47A1	Present	Present	Present	Present
chr17	19631416	19631759	-9295	Intergenic	SLC47A2	Present	Present	Present	Present
chr17	20219113	20219446	-5208	3'UTR	CCDC144CP	Present	Present	Present	Present
chr17	20978877	20979119	129	non-coding	LINC01563	Present	Present	Present	Present
chr17	25773802	25774136	-9505	Intergenic	KSR1	Present	Present	Present	Present
chr17	25872678	25872781	73739	intron	KSR1	Present	Present	Present	Present
chr17	25872921	25873209	74075	intron	KSR1	Present	Present	Present	Present
chr17	25873855	25874272	75073	intron	KSR1	Present	Present	Present	Present
chr17	25887089	25888003	-70668	intron	LGALS9	Present	Present	Present	Present
chr17	27294931	27295166	-16512	intron	PHF12	Present	Present	Present	Present
chr17	27295355	27296015	-17149	intron	PHF12	Present	Present	Present	Present
chr17	27297074	27297610	-18806	intron	PHF12	Present	Present	Present	Present
chr17	27300453	27300766	-22073	intron	PHF12	Present	Present	Present	Present
chr17	27365619	27365930	-4385	Intergenic	PIPOX	Present	Present	Present	Present
chr17	27367276	27367519	-2762	Intergenic	PIPOX	Present	Present	Present	Present
chr17	27369690	27369944	-342	promoter-TSS	PIPOX	Present	Present	Present	Present
chr17	27375564	27376186	5716	intron	PIPOX	Present	Present	Present	Present
chr17	27378264	27378679	8312	intron	PIPOX	Present	Present	Present	Present
chr17	27378782	27378871	8667	intron	PIPOX	Present	Present	Present	Present
chr17	27379033	27379106	8910	intron	PIPOX	Present	Present	Present	Present
chr17	27393029	27393423	9401	Intergenic	TIAF1	Present	Present	Present	Present
chr17	27405507	27405872	-3062	intron	TIAF1	Present	Present	Present	Present
chr17	27418995	27419127	-16434	intron	TIAF1	Present	Present	Present	Present
chr17	27439166	27439501	28074	intron	MYO18A	Present	Present	Present	Present
chr17	27439793	27439866	27578	intron	MYO18A	Present	Present	Present	Present
chr17	27478517	27478870	-11286	intron	MYO18A	Present	Present	Present	Present
chr17	29596751	29596979	27392	intron	OMG	Present	Present	Present	Present
chr17	30005346	30005953	103219	Intergenic	MIR365B	Present	Present	Present	Present
chr17	30024380	30024486	122003	Intergenic	MIR365B	Present	Present	Present	Present
chr17	32316891	32317111	166824	intron	ASIC2	Present	Present	Present	Present
chr17	36578065	36578191	-6580	Intergenic	ARHGAP23	Present	Present	Present	Present
chr17	36612516	36612795	27947	intron	ARHGAP23	Present	Present	Present	Present
chr17	36823876	36823887	7329	Intergenic	EPOP	Present	Present	Present	Present
chr17	37236731	37236997	23592	non-coding	RDM1P5	Present	Present	Present	Present
chr17	38459607	38459824	-5717	3'UTR	RARA	Present	Present	Present	Present
chr17	38463258	38463493	-2057	Intergenic	RARA	Present	Present	Present	Present
chr17	38463616	38463863	-1693	Intergenic	RARA	Present	Present	Present	Present
chr17	38463963	38464001	-1450	Intergenic	RARA	Present	Present	Present	Present
chr17	38464202	38464206	-1228	Intergenic	RARA	Present	Present	Present	Present
chr17	38704059	38704306	12464	Intergenic	CCR7	Present	Present	Present	Present
chr17	38707438	38707900	8977	Intergenic	CCR7	Present	Present	Present	Present
chr17	39137033	39137163	6155	exon	KRT40	Present	Present	Present	Present
chr17	39228151	39228637	-6263	Intergenic	KRTAP2-4	Present	Present	Present	Present
chr17	40144604	40144804	24479	intron	DNAJC7	Present	Present	Present	Present
chr17	40669618	40669771	3488	intron	MIR5010	Present	Present	Present	Present
chr17	40670592	40670822	4501	intron	MIR5010	Present	Present	Present	Present
chr17	40688853	40689063	699	intron	NAGLU	Present	Present	Present	Present
chr17	40713881	40714196	-128	promoter-TSS	COASY	Present	Present	Present	Present
chr17	40851050	40851361	8964	3'UTR	MIR6780A	Present	Present	Present	Present
chr17	41150112	41150421	-24	promoter-TSS	RPL27	Present	Present	Present	Present
chr17	41323249	41323382	84	promoter-TSS	NBR1	Present	Present	Present	Present
chr17	41400514	41400634	-19512	Intergenic	CCDC200	Present	Present	Present	Present
chr17	41534274	41534466	12196	Intergenic	MIR2117	Present	Present	Present	Present
chr17	41608365	41608526	-642	promoter-TSS	ETV4	Present	Present	Present	Present
chr17	41665513	41665895	-41996	Intergenic	ETV4	Present	Present	Present	Present
chr17	41669408	41669860	-45926	Intergenic	ETV4	Present	Present	Present	Present
chr17	41713930	41714141	24896	Intergenic	MEOX1	Present	Present	Present	Present
chr17	41734042	41734354	4733	intron	MEOX1	Present	Present	Present	Present
chr17	41739128	41739395	29	promoter-TSS	MEOX1	Present	Present	Present	Present
chr17	41742466	41742560	-3223	Intergenic	MEOX1	Present	Present	Present	Present
chr17	41957676	41957941	20184	intron	MPP2	Present	Present	Present	Present
chr17	42127028	42127352	16849	intron	LSM12	Present	Present	Present	Present
chr17	42172816	42172895	-20425	intron	LOC105371789	Present	Present	Present	Present
chr17	42183079	42183667	-9907	intron	LOC105371789	Present	Present	Present	Present
chr17	42347266	42347459	-1859	Intergenic	SLC4A1	Present	Present	Present	Present
chr17	42439219	42439297	1963	intron	FAM171A2	Present	Present	Present	Present
chr17	42681579	42682073	45891	Intergenic	LINC01180	Present	Present	Present	Present
chr17	42685826	42686057	41776	Intergenic	LINC01180	Present	Present	Present	Present
chr17	42785886	42786177	-2	promoter-TSS	DBF4B	Present	Present	Present	Present
chr17	43075521	43075878	-30028	Intergenic	C1QL1	Present	Present	Present	Present
chr17	43108977	43109354	19835	intron	DCAKD	Present	Present	Present	Present
chr17	43109482	43109640	19439	intron	DCAKD	Present	Present	Present	Present
chr17	43116012	43116546	12721	intron	DCAKD	Present	Present	Present	Present
chr17	43225977	43226187	1398	5'UTR	HEXIM1	Present	Present	Present	Present
chr17	43360286	43360826	-21095	intron	SPATA32	Present	Present	Present	Present
chr17	43365167	43365617	-25931	intron	SPATA32	Present	Present	Present	Present
chr17	43370742	43371034	23498	intron	MAP3K14	Present	Present	Present	Present
chr17	46068253	46068592	19943	Intergenic	CDK5RAP3	Present	Present	Present	Present
chr17	48716577	48716937	4515	intron	ABCC3	Present	Present	Present	Present
chr17	51431381	51431581	368616	Intergenic	C17orf112	Present	Present	Present	Present
chr17	54679953	54679989	8911	Intergenic	NOG	Present	Present	Present	Present
chr17	54680086	54680172	9069	Intergenic	NOG	Present	Present	Present	Present
chr17	54680404	54680545	9414	Intergenic	NOG	Present	Present	Present	Present
chr17	55657873	55658074	27800	intron	LOC101927539	Present	Present	Present	Present
chr17	66573441	66573651	-18978	intron	FAM20A	Present	Present	Present	Present
chr17	74678072	74678427	6496	intron	MXRA7	Present	Present	Present	Present
chr17	74692821	74693140	-8011	intron	MXRA7	Present	Present	Present	Present
chr17	75351213	75351581	-18022	intron	SEPTIN9	Present	Present	Present	Present
chr17	75417037	75417253	15986	intron	SEPTIN9	Present	Present	Present	Present
chr17	76311629	76311772	-37127	Intergenic	LINC01993	Present	Present	Present	Present
chr17	76819738	76819756	16862	intron	USP36	Present	Present	Present	Present
chr17	76869712	76869965	29445	intron	CEP295NL	Present	Present	Present	Present
chr17	77198018	77198313	127146	intron	ENGASE	Present	Present	Present	Present
chr17	77999909	78000092	9671	intron	TBC1D16	Present	Present	Present	Present
chr17	78003192	78003339	6406	intron	TBC1D16	Present	Present	Present	Present
chr17	78363201	78363848	-25443	intron	ENDOV	Present	Present	Present	Present
chr17	80296713	80296916	-5172	Intergenic	SECTM1	Present	Present	Present	Present
chr17	80357521	80357777	-18574	intron	HEXD	Present	Present	Present	Present
chr17	80452382	80452544	-25145	Intergenic	FOXK2	Present	Present	Present	Present
chr17	80821895	80822092	-24095	intron	ZNF750	Present	Present	Present	Present
chr17	80824764	80825012	-26990	intron	ZNF750	Present	Present	Present	Present
chr18	3282986	3283192	20372	Intergenic	MYL12B	Present	Present	Present	Present
chr18	3283332	3283344	20621	Intergenic	MYL12B	Present	Present	Present	Present
chr18	3526711	3526839	60527	intron	GAPLINC	Present	Present	Present	Present
chr18	3665845	3666038	62206	intron	DLGAP1-AS2	Present	Present	Present	Present
chr18	8799959	8800291	82746	intron	MTCL1	Present	Present	Present	Present
chr18	11042201	11042221	106550	intron	PIEZO2	Present	Present	Present	Present
chr18	11955794	11955998	-25610	Intergenic	IMPA2	Present	Present	Present	Present
chr18	20805633	20805972	70013	intron	CABLES1	Present	Present	Present	Present
chr18	20807254	20807265	71470	intron	CABLES1	Present	Present	Present	Present
chr18	20807344	20807608	71687	intron	CABLES1	Present	Present	Present	Present
chr18	20811398	20811576	75698	intron	CABLES1	Present	Present	Present	Present
chr18	20811769	20812007	76099	intron	CABLES1	Present	Present	Present	Present
chr18	20824293	20824827	88771	intron	CABLES1	Present	Present	Present	Present
chr18	20840102	20840138	104331	non-coding	CABLES1	Present	Present	Present	Present
chr18	20840273	20840568	104631	TTS	CABLES1	Present	Present	Present	Present
chr18	20880307	20880411	137566	intron	TMEM241	Present	Present	Present	Present
chr18	20981471	20981593	36393	intron	TMEM241	Present	Present	Present	Present
chr18	21656212	21656440	-36965	intron	TTC39C	Present	Present	Present	Present
chr18	22285070	22285491	-20465	Intergenic	LOC105372028	Present	Present	Present	Present
chr18	22567698	22568026	81	promoter-TSS	LINC01894	Present	Present	Present	Present
chr18	22745386	22745567	-177533	intron	LINC01894	Present	Present	Present	Present
chr18	23047219	23047856	-115407	Intergenic	ZNF521	Present	Present	Present	Present
chr18	23083508	23083801	-151524	Intergenic	ZNF521	Present	Present	Present	Present
chr18	23284492	23284838	-352535	Intergenic	ZNF521	Present	Present	Present	Present
chr18	23315504	23315809	354921	Intergenic	SS18	Present	Present	Present	Present
chr18	23317746	23318469	352470	Intergenic	SS18	Present	Present	Present	Present
chr18	23377984	23378185	292493	Intergenic	SS18	Present	Present	Present	Present
chr18	23406442	23406691	264011	Intergenic	SS18	Present	Present	Present	Present
chr18	23456694	23456922	213769	Intergenic	SS18	Present	Present	Present	Present
chr18	25027381	25027517	-104829	Intergenic	LOC105372038	Present	Present	Present	Present
chr18	25027681	25027724	-105082	Intergenic	LOC105372038	Present	Present	Present	Present
chr18	32605114	32605265	-16188	intron	MAPRE2	Present	Present	Present	Present
chr18	36039093	36039286	802091	Intergenic	MIR4318	Present	Present	Present	Present
chr18	40194700	40194892	428163	intron	LINC00907	Present	Present	Present	Present
chr18	42295173	42295446	34456	intron	SETBP1	Present	Present	Present	Present
chr18	42309766	42309938	48999	intron	SETBP1	Present	Present	Present	Present
chr18	42322655	42322904	61926	intron	SETBP1	Present	Present	Present	Present
chr18	42322992	42323109	62197	intron	SETBP1	Present	Present	Present	Present
chr18	42358724	42358954	97986	intron	SETBP1	Present	Present	Present	Present
chr18	42368122	42368343	107379	intron	SETBP1	Present	Present	Present	Present
chr18	42369798	42369984	109038	intron	SETBP1	Present	Present	Present	Present
chr18	42431768	42432000	118247	intron	MIR4319	Present	Present	Present	Present
chr18	42432096	42432463	117852	intron	MIR4319	Present	Present	Present	Present
chr18	42432750	42433207	117153	intron	MIR4319	Present	Present	Present	Present
chr18	42476875	42477242	73073	intron	MIR4319	Present	Present	Present	Present
chr18	57625329	57625554	58213	Intergenic	PMAIP1	Present	Present	Present	Present
chr18	58114241	58114455	-74340	Intergenic	MC4R	Present	Present	Present	Present
chr18	59196279	59196465	195709	intron	CDH20	Present	Present	Present	Present
chr18	59273677	59273843	-141649	Intergenic	LINC01544	Present	Present	Present	Present
chr18	59685338	59685641	-125249	Intergenic	RNF152	Present	Present	Present	Present
chr18	59697386	59697539	-137222	Intergenic	RNF152	Present	Present	Present	Present
chr18	60118199	60118658	-71830	Intergenic	ZCCHC2	Present	Present	Present	Present
chr18	60850634	60850946	135823	intron	BCL2	Present	Present	Present	Present
chr18	60905406	60905619	81101	intron	BCL2	Present	Present	Present	Present
chr18	62903518	62903895	-513782	Intergenic	CDH7	Present	Present	Present	Present
chr18	63404765	63404901	-12655	Intergenic	CDH7	Present	Present	Present	Present
chr18	65708693	65708925	-226750	Intergenic	LINC01903	Present	Present	Present	Present
chr18	66095433	66095581	286838	Intergenic	TMX3	Present	Present	Present	Present
chr18	66464661	66464819	-577	promoter-TSS	CCDC102B	Present	Present	Present	Present
chr18	69874627	69874824	336852	Intergenic	CBLN2	Present	Present	Present	Present
chr18	70042883	70043227	168522	Intergenic	CBLN2	Present	Present	Present	Present
chr18	74885371	74885552	-40722	Intergenic	MBP	Present	Present	Present	Present
chr18	74919568	74919738	-42151	Intergenic	GALR1	Present	Present	Present	Present
chr18	77616663	77616954	-6860	Intergenic	KCNG2	Present	Present	Present	Present
chr19	2848676	2848880	7305	intron	ZNF555	Present	Present	Present	Present
chr19	4585035	4585199	-25421	Intergenic	SEMA6B	Present	Present	Present	Present
chr19	4633640	4633942	-5737	Intergenic	TNFAIP8L1	Present	Present	Present	Present
chr19	4634632	4634819	-4803	Intergenic	TNFAIP8L1	Present	Present	Present	Present
chr19	4769601	4769782	574	promoter-TSS	MIR7-3HG	Present	Present	Present	Present
chr19	4878738	4878898	-11139	Intergenic	PLIN3	Present	Present	Present	Present
chr19	8219932	8220097	-5538	Intergenic	FBN3	Present	Present	Present	Present
chr19	13275311	13275584	14222	Intergenic	IER2	Present	Present	Present	Present
chr19	13958656	13958706	-4949	Intergenic	LOC284454	Present	Present	Present	Present
chr19	13961914	13961980	-8215	Intergenic	LOC284454	Present	Present	Present	Present
chr19	15391867	15392200	-771	promoter-TSS	BRD4	Present	Present	Present	Present
chr19	17606929	17607113	-15437	intron	PGLS	Present	Present	Present	Present
chr19	17664155	17664368	-2197	exon	COLGALT1	Present	Present	Present	Present
chr19	18156031	18156074	37073	Intergenic	ARRDC2	Present	Present	Present	Present
chr19	18497467	18497522	122	TTS	MIR3189	Present	Present	Present	Present
chr19	19528538	19528798	-17204	intron	MIR640	Present	Present	Present	Present
chr19	30153641	30153889	-2603	Intergenic	PLEKHF1	Present	Present	Present	Present
chr19	30882983	30883235	19818	intron	ZNF536	Present	Present	Present	Present
chr19	30941064	30941276	77879	intron	ZNF536	Present	Present	Present	Present
chr19	31118926	31119181	255762	intron	ZNF536	Present	Present	Present	Present
chr19	31139351	31139490	276129	intron	ZNF536	Present	Present	Present	Present
chr19	31155235	31155395	292024	intron	ZNF536	Present	Present	Present	Present
chr19	31202268	31202533	339109	3'UTR	ZNF536	Present	Present	Present	Present
chr19	31555523	31555768	-102771	Intergenic	LINC01791	Present	Present	Present	Present
chr19	31651119	31651552	-7081	intron	LINC01791	Present	Present	Present	Present
chr19	31668332	31668459	9979	intron	LINC01791	Present	Present	Present	Present
chr19	31704953	31705333	46727	intron	LINC01791	Present	Present	Present	Present
chr19	31714689	31715015	56436	intron	LINC01791	Present	Present	Present	Present
chr19	31744606	31745784	86779	intron	LINC01791	Present	Present	Present	Present
chr19	31746047	31746829	88022	intron	LINC01791	Present	Present	Present	Present
chr19	31748698	31748939	90402	intron	LINC01791	Present	Present	Present	Present
chr19	31749083	31749468	90859	intron	LINC01791	Present	Present	Present	Present
chr19	31753808	31753972	86452	intron	TSHZ3	Present	Present	Present	Present
chr19	31776977	31777074	63317	intron	TSHZ3	Present	Present	Present	Present
chr19	31808491	31808791	31701	intron	TSHZ3	Present	Present	Present	Present
chr19	31829055	31829308	11161	intron	TSHZ3	Present	Present	Present	Present
chr19	31843011	31843095	-2711	Intergenic	TSHZ3	Present	Present	Present	Present
chr19	31869299	31869827	-29221	Intergenic	TSHZ3	Present	Present	Present	Present
chr19	31899401	31899572	-59144	Intergenic	TSHZ3	Present	Present	Present	Present
chr19	31935893	31936116	-95662	Intergenic	TSHZ3	Present	Present	Present	Present
chr19	31939024	31939637	-98988	Intergenic	TSHZ3	Present	Present	Present	Present
chr19	31942912	31943154	-102691	Intergenic	TSHZ3	Present	Present	Present	Present
chr19	32399422	32400045	-117035	Intergenic	LINC01533	Present	Present	Present	Present
chr19	34061045	34061333	-48492	Intergenic	PEPD	Present	Present	Present	Present
chr19	34213407	34213807	38173	intron	CHST8	Present	Present	Present	Present
chr19	34218423	34218783	43169	intron	CHST8	Present	Present	Present	Present
chr19	34222707	34223417	47628	intron	CHST8	Present	Present	Present	Present
chr19	35168010	35168046	-92	promoter-TSS	SCGB1B2P	Present	Present	Present	Present
chr19	38761311	38761662	6273	intron	SPINT2	Present	Present	Present	Present
chr19	39353302	39353551	-10439	Intergenic	HNRNPL	Present	Present	Present	Present
chr19	39376657	39376879	-7853	intron	RINL	Present	Present	Present	Present
chr19	41805677	41805772	-10353	intron	CCDC97	Present	Present	Present	Present
chr19	42076116	42076426	-6247	intron	CEACAM21	Present	Present	Present	Present
chr19	42829397	42829476	-351	promoter-TSS	MEGF8	Present	Present	Present	Present
chr19	46636484	46636594	-8594	Intergenic	IGFL3	Present	Present	Present	Present
chr19	47363054	47363213	-1121	Intergenic	ARHGAP35	Present	Present	Present	Present
chr19	48352397	48352478	27243	Intergenic	CRX	Present	Present	Present	Present
chr19	49955266	49955311	-217	promoter-TSS	PIH1D1	Present	Present	Present	Present
chr19	57568334	57568745	-62970	Intergenic	USP29	Present	Present	Present	Present
chr2	1597344	1597835	150698	Intergenic	PXDN	Present	Present	Present	Present
chr2	1617478	1617802	130647	Intergenic	PXDN	Present	Present	Present	Present
chr2	1656832	1657518	91112	intron	PXDN	Present	Present	Present	Present
chr2	1689856	1690040	58339	intron	PXDN	Present	Present	Present	Present
chr2	1690186	1690855	57767	intron	PXDN	Present	Present	Present	Present
chr2	1690998	1691192	57192	intron	PXDN	Present	Present	Present	Present
chr2	1693919	1694142	54257	intron	PXDN	Present	Present	Present	Present
chr2	1711532	1712208	36417	intron	PXDN	Present	Present	Present	Present
chr2	1724957	1725305	23156	intron	PXDN	Present	Present	Present	Present
chr2	1734428	1734446	13850	intron	PXDN	Present	Present	Present	Present
chr2	1744644	1744868	3531	intron	PXDN	Present	Present	Present	Present
chr2	1748507	1748608	-270	promoter-TSS	PXDN	Present	Present	Present	Present
chr2	1748691	1748808	-462	promoter-TSS	PXDN	Present	Present	Present	Present
chr2	1795891	1796342	-47829	exon	PXDN	Present	Present	Present	Present
chr2	3128863	3129169	782	intron	LINC01250	Present	Present	Present	Present
chr2	3451698	3451900	68334	intron	TRAPPC12	Present	Present	Present	Present
chr2	3887170	3887379	132842	intron	DCDC2C	Present	Present	Present	Present
chr2	6646559	6646954	127163	Intergenic	LINC01246	Present	Present	Present	Present
chr2	6767470	6767579	6395	intron	LINC01246	Present	Present	Present	Present
chr2	9391701	9392045	44932	intron	ASAP2	Present	Present	Present	Present
chr2	9392244	9392370	45366	intron	ASAP2	Present	Present	Present	Present
chr2	9431521	9431776	84707	intron	ASAP2	Present	Present	Present	Present
chr2	9476981	9477306	85577	intron	ITGB1BP1	Present	Present	Present	Present
chr2	9799183	9799374	-28152	Intergenic	YWHAQ	Present	Present	Present	Present
chr2	10361698	10361846	-28975	Intergenic	MIR4261	Present	Present	Present	Present
chr2	10550172	10550499	36640	intron	SNORA80B	Present	Present	Present	Present
chr2	10550747	10550870	36167	intron	SNORA80B	Present	Present	Present	Present
chr2	10551272	10551482	35598	intron	SNORA80B	Present	Present	Present	Present
chr2	10554093	10554340	32759	intron	SNORA80B	Present	Present	Present	Present
chr2	10554682	10555077	32096	intron	SNORA80B	Present	Present	Present	Present
chr2	11182966	11183175	89232	Intergenic	FLJ33534	Present	Present	Present	Present
chr2	11196816	11196966	75411	Intergenic	FLJ33534	Present	Present	Present	Present
chr2	11614260	11614471	-8062	Intergenic	E2F6	Present	Present	Present	Present
chr2	11723217	11723217	40405	intron	GREB1	Present	Present	Present	Present
chr2	11723320	11723536	40616	intron	GREB1	Present	Present	Present	Present
chr2	11884153	11884532	-2416	intron	LPIN1	Present	Present	Present	Present
chr2	12146239	12146321	-962	promoter-TSS	MIR3681HG	Present	Present	Present	Present
chr2	12147119	12147308	-29	promoter-TSS	MIR3681HG	Present	Present	Present	Present
chr2	12197445	12197577	50269	intron	MIR3681HG	Present	Present	Present	Present
chr2	12246535	12246739	-92619	intron	MIR3681	Present	Present	Present	Present
chr2	12493092	12493269	153924	intron	MIR3681	Present	Present	Present	Present
chr2	13030315	13030686	116638	Intergenic	LOC100506474	Present	Present	Present	Present
chr2	15181501	15181815	408817	Intergenic	LRATD1	Present	Present	Present	Present
chr2	15780456	15780621	48546	Intergenic	DDX1	Present	Present	Present	Present
chr2	15871009	15871244	40220	Intergenic	LINC01804	Present	Present	Present	Present
chr2	16029928	16030343	-30386	Intergenic	MYCNUT	Present	Present	Present	Present
chr2	16031352	16031423	-29134	Intergenic	MYCNUT	Present	Present	Present	Present
chr2	16054796	16055054	-5596	Intergenic	MYCNUT	Present	Present	Present	Present
chr2	16059794	16059957	-646	promoter-TSS	MYCNUT	Present	Present	Present	Present
chr2	16083698	16083876	-1232	intron	MYCNOS	Present	Present	Present	Present
chr2	16133331	16133701	-50961	Intergenic	MYCNOS	Present	Present	Present	Present
chr2	16177816	16178174	-12554	Intergenic	GACAT3	Present	Present	Present	Present
chr2	16178654	16179274	-11585	Intergenic	GACAT3	Present	Present	Present	Present
chr2	16191203	16191613	859	intron	GACAT3	Present	Present	Present	Present
chr2	16382913	16383737	192776	Intergenic	GACAT3	Present	Present	Present	Present
chr2	16385999	16386775	195838	Intergenic	GACAT3	Present	Present	Present	Present
chr2	16387062	16387197	196580	Intergenic	GACAT3	Present	Present	Present	Present
chr2	16397171	16397633	206853	Intergenic	GACAT3	Present	Present	Present	Present
chr2	16408109	16408194	217602	Intergenic	GACAT3	Present	Present	Present	Present
chr2	16408369	16408680	217975	Intergenic	GACAT3	Present	Present	Present	Present
chr2	16438357	16438476	247867	Intergenic	GACAT3	Present	Present	Present	Present
chr2	16703456	16703910	143419	Intergenic	FAM49A	Present	Present	Present	Present
chr2	16795678	16796175	51176	intron	FAM49A	Present	Present	Present	Present
chr2	16806487	16806630	40544	intron	FAM49A	Present	Present	Present	Present
chr2	16813916	16814262	33013	intron	FAM49A	Present	Present	Present	Present
chr2	16833984	16834103	13059	intron	FAM49A	Present	Present	Present	Present
chr2	17240392	17240553	-393370	Intergenic	FAM49A	Present	Present	Present	Present
chr2	17974734	17974917	-22902	Intergenic	MSGN1	Present	Present	Present	Present
chr2	17981509	17981723	-16111	Intergenic	MSGN1	Present	Present	Present	Present
chr2	18228021	18228359	168256	Intergenic	KCNS3	Present	Present	Present	Present
chr2	18228531	18228884	168773	Intergenic	KCNS3	Present	Present	Present	Present
chr2	18229255	18229683	169535	Intergenic	KCNS3	Present	Present	Present	Present
chr2	18244084	18244458	184337	Intergenic	KCNS3	Present	Present	Present	Present
chr2	18298991	18299146	239134	Intergenic	KCNS3	Present	Present	Present	Present
chr2	18304519	18304679	244665	Intergenic	KCNS3	Present	Present	Present	Present
chr2	20262507	20262667	-11198	Intergenic	LAPTM4A	Present	Present	Present	Present
chr2	20265981	20266192	-14697	Intergenic	LAPTM4A	Present	Present	Present	Present
chr2	20291313	20291698	-40116	Intergenic	LAPTM4A	Present	Present	Present	Present
chr2	20578936	20579228	-27068	Intergenic	PUM2	Present	Present	Present	Present
chr2	20610874	20611457	-35670	Intergenic	RHOB	Present	Present	Present	Present
chr2	20724517	20724839	-23394	Intergenic	LOC107985856	Present	Present	Present	Present
chr2	20743031	20744220	-42341	Intergenic	LOC107985856	Present	Present	Present	Present
chr2	20751002	20751190	41212	Intergenic	HS1BP3-IT1	Present	Present	Present	Present
chr2	20751352	20751392	40936	Intergenic	HS1BP3-IT1	Present	Present	Present	Present
chr2	20760992	20761213	31206	Intergenic	HS1BP3-IT1	Present	Present	Present	Present
chr2	20778766	20779580	13135	Intergenic	HS1BP3-IT1	Present	Present	Present	Present
chr2	20784162	20784656	7899	Intergenic	HS1BP3-IT1	Present	Present	Present	Present
chr2	20822507	20822935	28137	intron	HS1BP3	Present	Present	Present	Present
chr2	20847528	20847885	3152	intron	HS1BP3	Present	Present	Present	Present
chr2	21478900	21479203	132193	Intergenic	TDRD15	Present	Present	Present	Present
chr2	23544762	23544901	-63219	Intergenic	KLHL29	Present	Present	Present	Present
chr2	23586788	23586963	-21175	Intergenic	KLHL29	Present	Present	Present	Present
chr2	23613170	23613271	5170	intron	KLHL29	Present	Present	Present	Present
chr2	23650789	23651176	42932	intron	KLHL29	Present	Present	Present	Present
chr2	23653396	23653493	45394	intron	KLHL29	Present	Present	Present	Present
chr2	23756149	23756305	148177	intron	KLHL29	Present	Present	Present	Present
chr2	23757426	23758264	149795	intron	KLHL29	Present	Present	Present	Present
chr2	23759179	23759379	151229	intron	KLHL29	Present	Present	Present	Present
chr2	23806848	23807265	199006	intron	KLHL29	Present	Present	Present	Present
chr2	23968700	23968965	181161	Intergenic	ATAD2B	Present	Present	Present	Present
chr2	24303688	24303899	3408	exon	TP53I3	Present	Present	Present	Present
chr2	24587965	24588161	-4658	Intergenic	ITSN2	Present	Present	Present	Present
chr2	24634056	24634180	-50713	Intergenic	ITSN2	Present	Present	Present	Present
chr2	24658779	24659242	-55113	Intergenic	NCOA1	Present	Present	Present	Present
chr2	24712995	24713212	-1020	Intergenic	NCOA1	Present	Present	Present	Present
chr2	24944379	24944667	-71461	intron	CENPO	Present	Present	Present	Present
chr2	25526771	25527132	24639	intron	MIR1301	Present	Present	Present	Present
chr2	25546072	25546404	5352	intron	MIR1301	Present	Present	Present	Present
chr2	27924660	27924853	13843	Intergenic	LINC01460	Present	Present	Present	Present
chr2	28022133	28022350	27655	intron	MRPL33	Present	Present	Present	Present
chr2	28022538	28022574	27970	intron	MRPL33	Present	Present	Present	Present
chr2	28569499	28569763	-36305	Intergenic	LOC100505716	Present	Present	Present	Present
chr2	28587961	28588444	-27523	Intergenic	FOSL2	Present	Present	Present	Present
chr2	28636927	28637094	-19471	3'UTR	FLJ31356	Present	Present	Present	Present
chr2	28637856	28637867	-20322	3'UTR	FLJ31356	Present	Present	Present	Present
chr2	28766650	28767255	-22272	intron	PLB1	Present	Present	Present	Present
chr2	28884622	28884827	74347	Intergenic	LOC100505774	Present	Present	Present	Present
chr2	28886944	28887430	71884	Intergenic	LOC100505774	Present	Present	Present	Present
chr2	28887972	28888255	70958	Intergenic	LOC100505774	Present	Present	Present	Present
chr2	28905993	28906524	52813	Intergenic	LOC100505774	Present	Present	Present	Present
chr2	28907108	28907370	51832	Intergenic	LOC100505774	Present	Present	Present	Present
chr2	28914619	28915004	44260	Intergenic	LOC100505774	Present	Present	Present	Present
chr2	28940330	28940556	18628	intron	LOC100505774	Present	Present	Present	Present
chr2	29234430	29234660	30381	intron	TOGARAM2	Present	Present	Present	Present
chr2	29337632	29337838	-9	promoter-TSS	CLIP4	Present	Present	Present	Present
chr2	29446855	29447245	-284	promoter-TSS	ALK	Present	Present	Present	Present
chr2	29584210	29584471	113903	intron	LOC105374389	Present	Present	Present	Present
chr2	29621697	29621983	76403	intron	LOC105374389	Present	Present	Present	Present
[truncated: 11,504 more rows]
