# Supplementary material for: NuRD subunit CHD4 regulates super-enhancer accessibility in rhabdomyosarcoma and represents a general tumor dependency
Source: eLife journal article supplement (doi:10.7554/elife.54993), 2020-08-03
Supplement: supp [file elife-54993-supp-v1.zip › elife_poa_e54993_Figure_4_figure_supplement_3.pdf]

Figure 4 - figure supplement 3

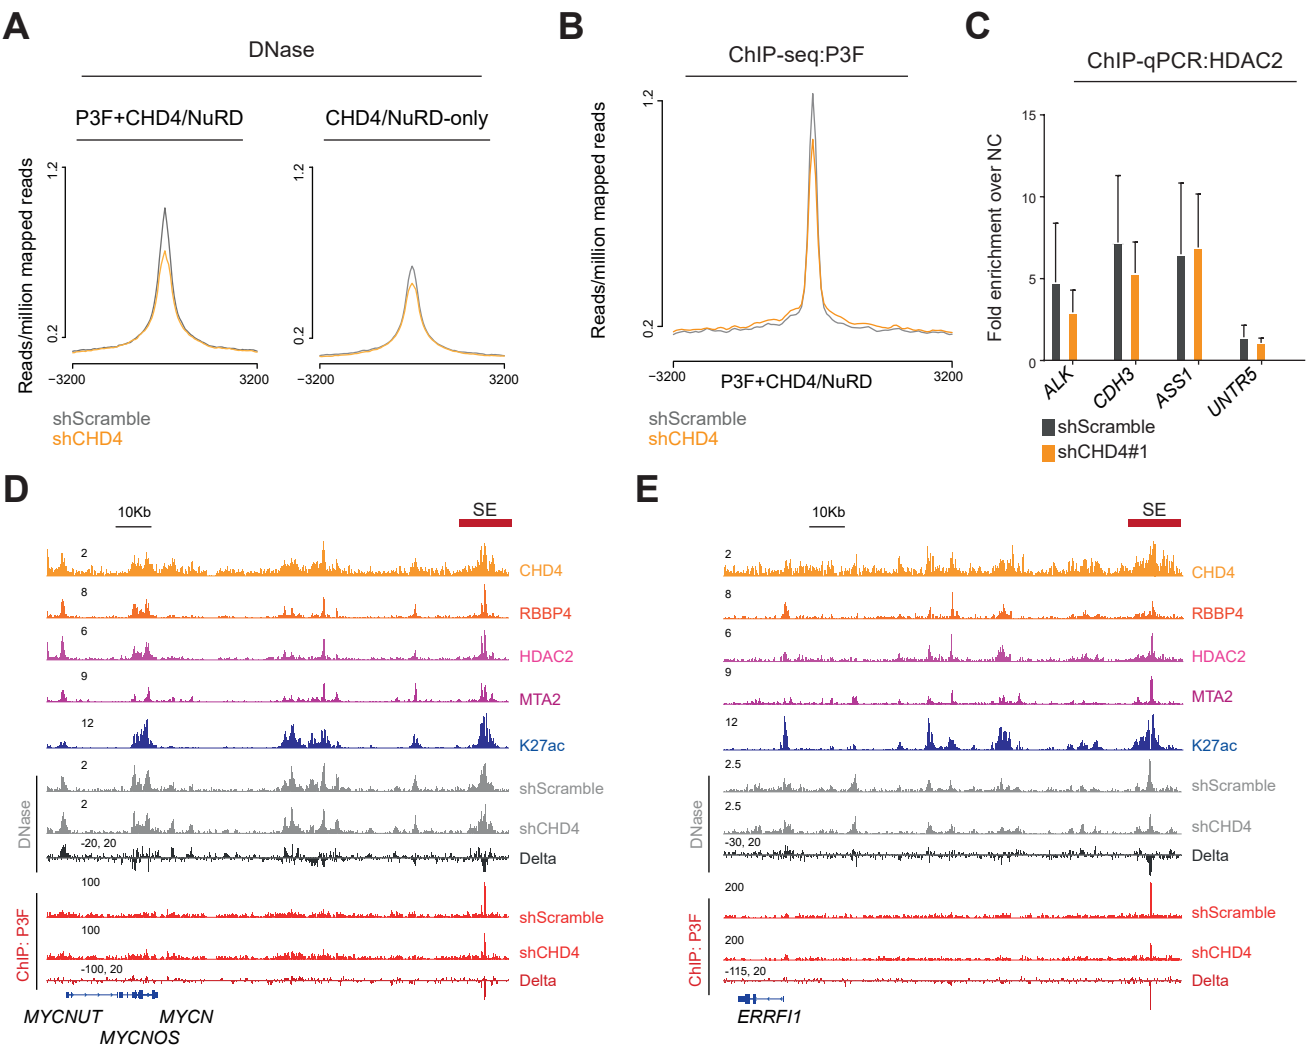

**Figure 4 - figure supplement 3** CHD4 depletion impairs P3F binding to enhancers and SEs. **A** Density plots depicting the average DNase I hypersensitivity signal in RH4 cells at P3F+CHD4/NuRD and CHD4/NuRD-only locations upon 48hrs of CHD4 knockdown (orange). **B** Density plot depicting the average P3F ChIP-seq signal in RH4 cells at P3F+CHD4/NuRD locations upon 48hrs of CHD4 knockdown (orange). **C** ChIP-qPCR of HDAC2 at selected P3F-binding sites (*ALK*, *CDH3* and *ASS1*) in RH4 cells upon 48hrs of CHD4 silencing (orange). Results are displayed as fold enrichment over negative control (NC, n=2). *UNTR5* is a gene desert region. **D** and **E** Gene tracks showing CHD4/NuRD at SEs bound by P3F and in the vicinity of the *MYCN* and *ERRFI1* genes. Also displayed are the changes in chromatin accessibility (DNase) and P3F ChIP-seq signal after 48hrs of CHD4 silencing by shRNA.
