# Supplementary material for: NuRD subunit CHD4 regulates super-enhancer accessibility in rhabdomyosarcoma and represents a general tumor dependency
Source: eLife journal article supplement (doi:10.7554/elife.54993), 2020-08-03
Supplement: supp [file elife-54993-supp-v1.zip › elife_poa_e54993_Figure_4_Source_data_1.xlsx]

## Sheet: Fig.4A and C
PAX3-FOXO1 and CHD4/NuRD ChIP-seq locations.
TSS - transcription start site
TTS - transcription termination site
Chromosome	Start	End	Distance to TSS	Annotation	Nearest gene	PAX3-FOXO1	CHD4	HDAC2	RBBP4	MTA2
chr1	7020629	7020796	175198	intron	CAMTA1	Present	Present	Present	Present	Present
chr1	7353883	7354161	95792	intron	LOC102725193	Present	Present	Present	Present	Present
chr1	7359433	7359646	90275	intron	LOC102725193	Present	Present	Present	Present	Present
chr1	7395400	7395586	54321	intron	LOC102725193	Present	Present	Present	Present	Present
chr1	8198021	8198240	-70602	Intergenic	LINC01714	Present	Present	Present	Present	Present
chr1	12538237	12538578	-28893	intron	SNORA59B	Present	Present	Present	Present	Present
chr1	12551748	12552066	-15393	intron	SNORA59B	Present	Present	Present	Present	Present
chr1	17040095	17040251	6479	intron	ESPNP	Present	Present	Present	Present	Present
chr1	18464512	18464721	30324	intron	IGSF21	Present	Present	Present	Present	Present
chr1	20061884	20062190	63805	intron	TMCO4	Present	Present	Present	Present	Present
chr1	20091979	20092511	33597	intron	TMCO4	Present	Present	Present	Present	Present
chr1	20142452	20142629	-764	promoter-TSS	RNF186	Present	Present	Present	Present	Present
chr1	21036877	21037042	7541	intron	KIF17	Present	Present	Present	Present	Present
chr1	21037132	21037446	7211	intron	KIF17	Present	Present	Present	Present	Present
chr1	21038403	21038670	5964	intron	KIF17	Present	Present	Present	Present	Present
chr1	22266202	22266479	-2537	Intergenic	HSPG2	Present	Present	Present	Present	Present
chr1	22539375	22539393	-53348	Intergenic	MIR4418	Present	Present	Present	Present	Present
chr1	23134862	23135010	54783	intron	MIR4253	Present	Present	Present	Present	Present
chr1	23924946	23925206	-28748	Intergenic	MDS2	Present	Present	Present	Present	Present
chr1	24691377	24691874	42095	TTS	GRHL3	Present	Present	Present	Present	Present
chr1	24712794	24713024	-27068	intron	NIPAL3	Present	Present	Present	Present	Present
chr1	26056308	26056565	-70248	intron	SELENON	Present	Present	Present	Present	Present
chr1	26063729	26063963	-62838	intron	SELENON	Present	Present	Present	Present	Present
chr1	26323474	26323634	1000	intron	PAFAH2	Present	Present	Present	Present	Present
chr1	27755157	27755320	36112	intron	GPR3	Present	Present	Present	Present	Present
chr1	28201758	28201979	2813	intron	THEMIS2	Present	Present	Present	Present	Present
chr1	30148328	30148796	361897	Intergenic	LINC01648	Present	Present	Present	Present	Present
chr1	30998997	30999227	-192507	Intergenic	MATN1-AS1	Present	Present	Present	Present	Present
chr1	31180791	31180998	-10725	Intergenic	MATN1-AS1	Present	Present	Present	Present	Present
chr1	31352070	31352265	29438	intron	SDC3	Present	Present	Present	Present	Present
chr1	33337299	33337508	682	promoter-TSS	FNDC5	Present	Present	Present	Present	Present
chr1	33642147	33642327	-86	promoter-TSS	TRIM62	Present	Present	Present	Present	Present
chr1	33848365	33848629	-7303	Intergenic	PHC2	Present	Present	Present	Present	Present
chr1	40311095	40311523	37867	intron	TRIT1	Present	Present	Present	Present	Present
chr1	40362600	40362871	4854	3'UTR	MYCL	Present	Present	Present	Present	Present
chr1	40427510	40427724	6800	intron	MFSD2A	Present	Present	Present	Present	Present
chr1	42610112	42610256	-8897	Intergenic	GUCA2B	Present	Present	Present	Present	Present
chr1	57877074	57877298	11598	intron	DAB1	Present	Present	Present	Present	Present
chr1	59058302	59058416	-15435	Intergenic	TACSTD2	Present	Present	Present	Present	Present
chr1	59362168	59362449	111485	intron	LINC01135	Present	Present	Present	Present	Present
chr1	59622592	59622776	-10205	Intergenic	HSD52	Present	Present	Present	Present	Present
chr1	59629569	59629773	-17192	Intergenic	HSD52	Present	Present	Present	Present	Present
chr1	59680464	59680778	-68142	Intergenic	HSD52	Present	Present	Present	Present	Present
chr1	59833236	59833464	57646	intron	FGGY	Present	Present	Present	Present	Present
chr1	59880118	59880441	-101023	intron	FGGY	Present	Present	Present	Present	Present
chr1	59892887	59893102	-88308	intron	FGGY	Present	Present	Present	Present	Present
chr1	60066894	60067052	85671	intron	FGGY	Present	Present	Present	Present	Present
chr1	60180868	60180904	18082	intron	MIR4711	Present	Present	Present	Present	Present
chr1	60969046	60969158	119255	Intergenic	LINC01748	Present	Present	Present	Present	Present
chr1	61803685	61803871	-84588	intron	NFIA-AS1	Present	Present	Present	Present	Present
chr1	62765578	62765873	19380	intron	KANK4	Present	Present	Present	Present	Present
chr1	64109689	64109915	20915	intron	PGM1	Present	Present	Present	Present	Present
chr1	64119681	64119952	30929	intron	PGM1	Present	Present	Present	Present	Present
chr1	68198535	68198716	47741	intron	GADD45A	Present	Present	Present	Present	Present
chr1	77236830	77236988	8043	intron	LINC02567	Present	Present	Present	Present	Present
chr1	77980243	77980408	168018	intron	ZZZ3	Present	Present	Present	Present	Present
chr1	81592765	81592914	-179038	Intergenic	ADGRL2	Present	Present	Present	Present	Present
chr1	83568554	83568751	-116761	intron	LINC01361	Present	Present	Present	Present	Present
chr1	87661780	87662069	-16428	Intergenic	LINC02801	Present	Present	Present	Present	Present
chr1	90868832	90868979	-254402	Intergenic	SNORD3G	Present	Present	Present	Present	Present
chr1	94074265	94074380	5332	intron	BCAR3	Present	Present	Present	Present	Present
chr1	94133750	94134076	13013	intron	BCAR3	Present	Present	Present	Present	Present
chr1	94135045	94135246	11781	intron	BCAR3	Present	Present	Present	Present	Present
chr1	94560692	94561224	25746	intron	ABCA4	Present	Present	Present	Present	Present
chr1	94591893	94592047	-5266	Intergenic	ABCA4	Present	Present	Present	Present	Present
chr1	95100582	95100745	91405	intron	MIR12133	Present	Present	Present	Present	Present
chr1	95269128	95269339	16555	intron	SLC44A3-AS1	Present	Present	Present	Present	Present
chr1	95339507	95339966	49687	intron	SLC44A3	Present	Present	Present	Present	Present
chr1	101517363	101517529	26044	intron	LOC102606465	Present	Present	Present	Present	Present
chr1	108479856	108480035	-27120	intron	VAV3-AS1	Present	Present	Present	Present	Present
chr1	108559156	108559344	-51448	Intergenic	VAV3	Present	Present	Present	Present	Present
chr1	109839510	109839668	10044	intron	MYBPHL	Present	Present	Present	Present	Present
chr1	110072574	110073331	-9542	Intergenic	GPR61	Present	Present	Present	Present	Present
chr1	112272006	112272169	9930	intron	INKA2	Present	Present	Present	Present	Present
chr1	112278610	112278885	3270	intron	INKA2	Present	Present	Present	Present	Present
chr1	112423658	112423993	-24298	intron	KCND3-IT1	Present	Present	Present	Present	Present
chr1	112449624	112449828	-2553	intron	KCND3-AS1	Present	Present	Present	Present	Present
chr1	112789800	112789980	-148946	Intergenic	CTTNBP2NL	Present	Present	Present	Present	Present
chr1	114884615	114884851	169091	Intergenic	TRIM33	Present	Present	Present	Present	Present
chr1	116307776	116307995	3541	intron	CASQ2	Present	Present	Present	Present	Present
chr1	117395627	117395773	-56838	Intergenic	PTGFRN	Present	Present	Present	Present	Present
chr1	117396395	117396650	-56016	Intergenic	PTGFRN	Present	Present	Present	Present	Present
chr1	117421805	117421977	-30647	Intergenic	PTGFRN	Present	Present	Present	Present	Present
chr1	117533380	117533711	-10827	TTS	CD101	Present	Present	Present	Present	Present
chr1	117803857	117803954	-34183	Intergenic	LINC01525	Present	Present	Present	Present	Present
chr1	118792410	118792608	-64658	Intergenic	SPAG17	Present	Present	Present	Present	Present
chr1	118795951	118796443	-68346	Intergenic	SPAG17	Present	Present	Present	Present	Present
chr1	118876186	118876842	-148663	Intergenic	SPAG17	Present	Present	Present	Present	Present
chr1	119046841	119047007	-319073	Intergenic	SPAG17	Present	Present	Present	Present	Present
chr1	119282097	119282266	248785	Intergenic	TBX15	Present	Present	Present	Present	Present
chr1	119331300	119331468	199582	Intergenic	TBX15	Present	Present	Present	Present	Present
chr1	120060329	120060538	10600	Intergenic	HSD3B1	Present	Present	Present	Present	Present
chr1	120096828	120097118	-9530	Intergenic	HSD3BP4	Present	Present	Present	Present	Present
chr1	144994954	144995142	-15	promoter-TSS	PDE4DIP	Present	Present	Present	Present	Present
chr1	145000817	145000974	-3784	intron	PDE4DIP	Present	Present	Present	Present	Present
chr1	151282324	151282525	17468	intron	PI4KB	Present	Present	Present	Present	Present
chr1	154740058	154740229	92209	intron	KCNN3	Present	Present	Present	Present	Present
chr1	154775847	154775901	56478	intron	KCNN3	Present	Present	Present	Present	Present
chr1	154776061	154776317	56163	intron	KCNN3	Present	Present	Present	Present	Present
chr1	155938650	155938882	9200	intron	ARHGEF2	Present	Present	Present	Present	Present
chr1	160344568	160344843	7844	Intergenic	NHLH1	Present	Present	Present	Present	Present
chr1	161676672	161676885	-241	promoter-TSS	FCRLA	Present	Present	Present	Present	Present
chr1	161981152	161981544	12907	intron	OLFML2B	Present	Present	Present	Present	Present
chr1	166563975	166564177	-9077	Intergenic	FMO9P	Present	Present	Present	Present	Present
chr1	168439007	168439227	25765	intron	LOC101928565	Present	Present	Present	Present	Present
chr1	170986658	170986847	-73294	intron	FMO3	Present	Present	Present	Present	Present
chr1	172320992	172321138	-68760	intron	C1orf105	Present	Present	Present	Present	Present
chr1	180895651	180895847	13716	intron	KIAA1614	Present	Present	Present	Present	Present
chr1	181066419	181066569	8658	Intergenic	IER5	Present	Present	Present	Present	Present
chr1	182091493	182091763	-60781	Intergenic	ZNF648	Present	Present	Present	Present	Present
chr1	182269347	182269511	13767	intron	LINC01344	Present	Present	Present	Present	Present
chr1	182581070	182581221	-3130	Intergenic	LINC01686	Present	Present	Present	Present	Present
chr1	182585385	182585610	1222	non-coding	LINC01686	Present	Present	Present	Present	Present
chr1	182602835	182603211	18748	Intergenic	LINC01686	Present	Present	Present	Present	Present
chr1	182668758	182668921	-13158	Intergenic	LINC01688	Present	Present	Present	Present	Present
chr1	201280126	201280557	27707	intron	PKP1	Present	Present	Present	Present	Present
chr1	201609797	201610002	-7551	Intergenic	NAV1	Present	Present	Present	Present	Present
chr1	202558434	202558643	49296	TTS	PPP1R12B	Present	Present	Present	Present	Present
chr1	202934171	202934431	2084	intron	CYB5R1	Present	Present	Present	Present	Present
chr1	205895003	205895100	17533	intron	SLC26A9	Present	Present	Present	Present	Present
chr1	209699481	209699746	-57446	Intergenic	CAMK1G	Present	Present	Present	Present	Present
chr1	219026109	219026202	65698	intron	LINC01710	Present	Present	Present	Present	Present
chr1	226730559	226730764	-5804	Intergenic	STUM	Present	Present	Present	Present	Present
chr1	226850716	226850821	12001	intron	ITPKB-IT1	Present	Present	Present	Present	Present
chr1	226998056	226998156	-60167	Intergenic	PSEN2	Present	Present	Present	Present	Present
chr1	235184155	235184248	-84455	Intergenic	LOC101927851	Present	Present	Present	Present	Present
chr1	239973383	239973686	89638	intron	CHRM3-AS1	Present	Present	Present	Present	Present
chr10	5656138	5656333	-18154	Intergenic	LINC02657	Present	Present	Present	Present	Present
chr10	13003548	13003706	40086	intron	CCDC3	Present	Present	Present	Present	Present
chr10	14302314	14302507	70473	intron	FRMD4A	Present	Present	Present	Present	Present
chr10	14439217	14439410	-14037	Intergenic	MIR4293	Present	Present	Present	Present	Present
chr10	24417453	24417654	-80167	intron	KIAA1217	Present	Present	Present	Present	Present
chr10	30285617	30285881	62766	Intergenic	JCAD	Present	Present	Present	Present	Present
chr10	31893202	31893545	-204689	Intergenic	LOC100505502	Present	Present	Present	Present	Present
chr10	31908797	31908805	-220117	Intergenic	LOC100505502	Present	Present	Present	Present	Present
chr10	34479552	34479762	-418049	intron	LINC00838	Present	Present	Present	Present	Present
chr10	34588023	34588210	516108	intron	PARD3	Present	Present	Present	Present	Present
chr10	35698222	35698389	72503	intron	CCNY	Present	Present	Present	Present	Present
chr10	36178985	36179213	111869	Intergenic	PCAT5	Present	Present	Present	Present	Present
chr10	36223553	36223875	156484	Intergenic	PCAT5	Present	Present	Present	Present	Present
chr10	36474099	36474237	406938	Intergenic	PCAT5	Present	Present	Present	Present	Present
chr10	37014589	37014755	-400113	Intergenic	ANKRD30A	Present	Present	Present	Present	Present
chr10	44516230	44516503	108516	Intergenic	LINC00841	Present	Present	Present	Present	Present
chr10	44540585	44540736	132810	Intergenic	LINC00841	Present	Present	Present	Present	Present
chr10	44796607	44796959	8585	Intergenic	C10orf142	Present	Present	Present	Present	Present
chr10	45442931	45443053	12145	intron	TMEM72-AS1	Present	Present	Present	Present	Present
chr10	45443246	45443392	11818	intron	TMEM72-AS1	Present	Present	Present	Present	Present
chr10	45459735	45459969	4602	intron	RASSF4	Present	Present	Present	Present	Present
chr10	50567757	50568051	36231	Intergenic	DRGX	Present	Present	Present	Present	Present
chr10	63808765	63809118	-175	promoter-TSS	ARID5B	Present	Present	Present	Present	Present
chr10	64216606	64216941	-63434	intron	ZNF365	Present	Present	Present	Present	Present
chr10	65473218	65473355	-191636	Intergenic	JMJD1C	Present	Present	Present	Present	Present
chr10	68082075	68082248	-603633	intron	LRRTM3	Present	Present	Present	Present	Present
chr10	72349716	72349875	12702	Intergenic	PRF1	Present	Present	Present	Present	Present
chr10	72413017	72413258	-19125	Intergenic	ADAMTS14	Present	Present	Present	Present	Present
chr10	72424515	72424884	-7563	Intergenic	ADAMTS14	Present	Present	Present	Present	Present
chr10	72476344	72476494	44157	intron	ADAMTS14	Present	Present	Present	Present	Present
chr10	73350897	73351013	-79278	intron	CDH23-AS1	Present	Present	Present	Present	Present
chr10	75193414	75193576	-176	promoter-TSS	MSS51	Present	Present	Present	Present	Present
chr10	75648779	75648936	-14508	Intergenic	CAMK2G	Present	Present	Present	Present	Present
chr10	79068284	79068435	42160	intron	KCNMA1	Present	Present	Present	Present	Present
chr10	79075409	79075559	35035	intron	KCNMA1	Present	Present	Present	Present	Present
chr10	79110475	79110698	-44	promoter-TSS	KCNMA1-AS3	Present	Present	Present	Present	Present
chr10	82012376	82012753	5050	non-coding	LOC100130698	Present	Present	Present	Present	Present
chr10	93100715	93100927	-68171	intron	HECTD2	Present	Present	Present	Present	Present
chr10	93351232	93351539	19832	intron	HECTD2-AS1	Present	Present	Present	Present	Present
chr10	102643271	102643428	-29371	Intergenic	SLF2	Present	Present	Present	Present	Present
chr10	102643534	102643556	-29175	Intergenic	SLF2	Present	Present	Present	Present	Present
chr10	102646821	102647103	-25758	Intergenic	SLF2	Present	Present	Present	Present	Present
chr10	102650504	102650745	-22096	Intergenic	SLF2	Present	Present	Present	Present	Present
chr10	103055154	103055304	-31922	Intergenic	LINC02681	Present	Present	Present	Present	Present
chr10	103451013	103451174	3834	intron	FBXW4	Present	Present	Present	Present	Present
chr10	104022694	104022787	17451	intron	GBF1	Present	Present	Present	Present	Present
chr10	104028872	104029199	23746	intron	GBF1	Present	Present	Present	Present	Present
chr10	104040456	104040621	35249	intron	GBF1	Present	Present	Present	Present	Present
chr10	104536775	104537064	941	intron	WBP1L	Present	Present	Present	Present	Present
chr10	104572084	104572194	25031	intron	CYP17A1	Present	Present	Present	Present	Present
chr10	112396951	112397135	-7051	Intergenic	RBM20	Present	Present	Present	Present	Present
chr10	112411361	112411532	7352	intron	RBM20	Present	Present	Present	Present	Present
chr10	114715846	114716006	5917	intron	TCF7L2	Present	Present	Present	Present	Present
chr10	114808342	114808534	3324	intron	SNORA87	Present	Present	Present	Present	Present
chr10	116134111	116134313	30049	intron	AFAP1L2	Present	Present	Present	Present	Present
chr10	120232459	120232547	115883	Intergenic	LINC00867	Present	Present	Present	Present	Present
chr10	122856380	122856633	245632	Intergenic	WDR11	Present	Present	Present	Present	Present
chr10	123069694	123070068	220947	Intergenic	FGFR2	Present	Present	Present	Present	Present
chr10	123260358	123260511	30394	exon	FGFR2	Present	Present	Present	Present	Present
chr10	123440644	123441062	-82881	Intergenic	FGFR2	Present	Present	Present	Present	Present
chr10	128039040	128039370	37841	intron	ADAM12	Present	Present	Present	Present	Present
chr10	128061806	128062032	15127	intron	ADAM12	Present	Present	Present	Present	Present
chr10	128086694	128086875	-9738	Intergenic	ADAM12	Present	Present	Present	Present	Present
chr10	128947820	128948050	46920	intron	INSYN2A	Present	Present	Present	Present	Present
chr10	130096372	130096619	12281	intron	LINC01163	Present	Present	Present	Present	Present
chr10	135430116	135430283	10100	Intergenic	FRG2B	Present	Present	Present	Present	Present
chr10	135430409	135430762	9714	Intergenic	FRG2B	Present	Present	Present	Present	Present
chr10	135430937	135431033	9314	Intergenic	FRG2B	Present	Present	Present	Present	Present
chr10	135432457	135432647	7747	Intergenic	FRG2B	Present	Present	Present	Present	Present
chr11	8481413	8481557	134038	intron	STK33	Present	Present	Present	Present	Present
chr11	10373468	10373624	43686	intron	CAND1.11	Present	Present	Present	Present	Present
chr11	10476477	10476633	-256	promoter-TSS	AMPD3	Present	Present	Present	Present	Present
chr11	11485024	11485178	-110304	intron	CSNK2A3	Present	Present	Present	Present	Present
chr11	13126761	13127070	96052	Intergenic	RASSF10	Present	Present	Present	Present	Present
chr11	13853325	13853488	38757	intron	LINC02545	Present	Present	Present	Present	Present
chr11	17670108	17670396	48234	Intergenic	LINC02729	Present	Present	Present	Present	Present
chr11	17671801	17672396	46388	Intergenic	LINC02729	Present	Present	Present	Present	Present
chr11	17673275	17673488	45105	Intergenic	LINC02729	Present	Present	Present	Present	Present
chr11	17707831	17708110	10516	Intergenic	LINC02729	Present	Present	Present	Present	Present
chr11	17709528	17709761	8842	Intergenic	LINC02729	Present	Present	Present	Present	Present
chr11	17721021	17721409	-2729	Intergenic	LINC02729	Present	Present	Present	Present	Present
chr11	19374405	19374663	2263	intron	NAV2	Present	Present	Present	Present	Present
chr11	20297626	20297842	-87497	Intergenic	HTATIP2	Present	Present	Present	Present	Present
chr11	20325171	20325432	-59930	Intergenic	HTATIP2	Present	Present	Present	Present	Present
chr11	22100661	22100838	-113882	Intergenic	ANO5	Present	Present	Present	Present	Present
chr11	24953926	24954050	435389	intron	LUZP2	Present	Present	Present	Present	Present
chr11	30444079	30444186	99481	intron	ARL14EP	Present	Present	Present	Present	Present
chr11	30588751	30588868	13231	intron	MPPED2	Present	Present	Present	Present	Present
chr11	32102746	32103121	-9687	Intergenic	RCN1	Present	Present	Present	Present	Present
chr11	33679858	33680109	42303	intron	C11orf91	Present	Present	Present	Present	Present
chr11	34367150	34367312	12326	intron	ABTB2	Present	Present	Present	Present	Present
chr11	35173531	35173697	-10883	intron	SNORD164	Present	Present	Present	Present	Present
chr11	35343416	35343623	97586	intron	SLC1A2	Present	Present	Present	Present	Present
chr11	35915552	35915912	-49799	Intergenic	LDLRAD3	Present	Present	Present	Present	Present
chr11	36052374	36052527	20802	intron	MIR3973	Present	Present	Present	Present	Present
chr11	36094929	36095213	4380	intron	LOC101928510	Present	Present	Present	Present	Present
chr11	36145346	36145503	-45973	intron	LOC101928510	Present	Present	Present	Present	Present
chr11	44268306	44268599	63237	3'UTR	ALX4	Present	Present	Present	Present	Present
chr11	44622670	44622828	35536	intron	CD82	Present	Present	Present	Present	Present
chr11	44645669	44645767	58505	Intergenic	CD82	Present	Present	Present	Present	Present
chr11	57742351	57742667	-48844	Intergenic	OR9Q1	Present	Present	Present	Present	Present
chr11	64163675	64163906	27716	Intergenic	MIR1237	Present	Present	Present	Present	Present
chr11	75067608	75067977	-5087	Intergenic	ARRB1	Present	Present	Present	Present	Present
chr11	76003299	76003511	-85859	Intergenic	WNT11	Present	Present	Present	Present	Present
chr11	79374162	79374347	-222180	Intergenic	TENM4	Present	Present	Present	Present	Present
chr11	82700388	82700532	44856	intron	RAB30	Present	Present	Present	Present	Present
chr11	82719028	82719241	26182	intron	RAB30	Present	Present	Present	Present	Present
chr11	85430209	85430429	74	promoter-TSS	SYTL2	Present	Present	Present	Present	Present
chr11	94509760	94509961	8338	intron	AMOTL1	Present	Present	Present	Present	Present
chr11	96485946	96486203	244485	Intergenic	LINC02737	Present	Present	Present	Present	Present
chr11	99187594	99187712	-239223	intron	CNTN5	Present	Present	Present	Present	Present
chr11	110001476	110001586	37413	intron	ZC3H12C	Present	Present	Present	Present	Present
chr11	112394400	112394543	32054	intron	LINC02764	Present	Present	Present	Present	Present
chr11	113157940	113158101	-13397	Intergenic	NCAM1-AS1	Present	Present	Present	Present	Present
chr11	113376854	113377126	-30870	Intergenic	DRD2	Present	Present	Present	Present	Present
chr11	116088317	116088502	-421730	Intergenic	LINC02702	Present	Present	Present	Present	Present
chr11	125271599	125271673	-93474	intron	LOC403312	Present	Present	Present	Present	Present
chr11	125971391	125971511	-38264	Intergenic	CDON	Present	Present	Present	Present	Present
chr11	126417227	126417293	-105413	intron	LOC101929427	Present	Present	Present	Present	Present
chr12	611342	611533	42332	intron	B4GALNT3	Present	Present	Present	Present	Present
chr12	1283045	1283257	146237	intron	ERC1	Present	Present	Present	Present	Present
chr12	4147351	4147452	-164787	Intergenic	PARP11	Present	Present	Present	Present	Present
chr12	4354156	4354312	-28694	Intergenic	CCND2	Present	Present	Present	Present	Present
chr12	9287858	9287872	-19040	Intergenic	A2M	Present	Present	Present	Present	Present
chr12	17126232	17126485	-15323	Intergenic	SKP1P2	Present	Present	Present	Present	Present
chr12	18210098	18210382	32887	Intergenic	RERGL	Present	Present	Present	Present	Present
chr12	20365707	20365935	-84986	Intergenic	LINC02468	Present	Present	Present	Present	Present
chr12	27187812	27188105	12467	Intergenic	MED21	Present	Present	Present	Present	Present
chr12	29863144	29863304	73651	intron	TMTC1	Present	Present	Present	Present	Present
chr12	31123780	31124013	44058	intron	TSPAN11	Present	Present	Present	Present	Present
chr12	46554347	46554660	105796	Intergenic	SLC38A1	Present	Present	Present	Present	Present
chr12	46603859	46604112	56314	intron	SLC38A1	Present	Present	Present	Present	Present
chr12	50203212	50203489	18846	intron	NCKAP5L	Present	Present	Present	Present	Present
chr12	65984211	65984421	-12333	intron	LINC02454	Present	Present	Present	Present	Present
chr12	66305204	66305364	-29179	intron	HMGA2-AS1	Present	Present	Present	Present	Present
chr12	66342453	66342777	-66510	intron	HMGA2-AS1	Present	Present	Present	Present	Present
chr12	66626112	66626355	-18629	intron	MIR6502	Present	Present	Present	Present	Present
chr12	66634204	66634535	-10493	intron	MIR6502	Present	Present	Present	Present	Present
chr12	67752934	67753112	83316	Intergenic	LINC02420	Present	Present	Present	Present	Present
chr12	68503591	68503847	49801	Intergenic	IFNG	Present	Present	Present	Present	Present
chr12	70291507	70291879	72686	intron	MYRFL	Present	Present	Present	Present	Present
chr12	70385555	70385982	166761	Intergenic	MYRFL	Present	Present	Present	Present	Present
chr12	76099837	76100013	-194536	Intergenic	KRR1	Present	Present	Present	Present	Present
chr12	89938489	89938682	-18546	Intergenic	POC1B-GALNT4	Present	Present	Present	Present	Present
chr12	90547066	90547222	-139951	Intergenic	LINC02392	Present	Present	Present	Present	Present
chr12	92428763	92428954	106631	intron	LINC01619	Present	Present	Present	Present	Present
chr12	95107113	95107234	-62840	Intergenic	TMCC3	Present	Present	Present	Present	Present
chr12	95108163	95108321	-63909	Intergenic	TMCC3	Present	Present	Present	Present	Present
chr12	102916716	102916897	-42465	Intergenic	IGF1	Present	Present	Present	Present	Present
chr12	102933755	102933965	-59519	Intergenic	IGF1	Present	Present	Present	Present	Present
chr12	104074486	104074763	93573	intron	STAB2	Present	Present	Present	Present	Present
chr12	105062087	105062464	76864	intron	MIR3922	Present	Present	Present	Present	Present
chr12	106100109	106100299	-348	promoter-TSS	CASC18	Present	Present	Present	Present	Present
chr12	106100595	106100714	102	intron	CASC18	Present	Present	Present	Present	Present
chr12	106517452	106517623	16274	intron	NUAK1	Present	Present	Present	Present	Present
chr12	108977907	108978052	13881	Intergenic	TMEM119	Present	Present	Present	Present	Present
chr12	110687130	110687329	-31823	Intergenic	ATP2A2	Present	Present	Present	Present	Present
chr12	116561438	116561689	24896	intron	MIR620	Present	Present	Present	Present	Present
chr12	116784086	116784241	-69172	Intergenic	MED13L	Present	Present	Present	Present	Present
chr12	119131977	119132416	67288	Intergenic	LINC02423	Present	Present	Present	Present	Present
chr12	119268152	119268354	3088	intron	LINC02439	Present	Present	Present	Present	Present
chr12	125230726	125230804	93452	Intergenic	SCARB1	Present	Present	Present	Present	Present
chr12	125249443	125249762	74615	Intergenic	SCARB1	Present	Present	Present	Present	Present
chr12	125408811	125408915	8770	Intergenic	MIR5188	Present	Present	Present	Present	Present
chr13	22157715	22157872	20516	intron	MICU2	Present	Present	Present	Present	Present
chr13	22312797	22312995	67684	Intergenic	FGF9	Present	Present	Present	Present	Present
chr13	22742734	22742880	-41617	Intergenic	LINC00540	Present	Present	Present	Present	Present
chr13	23025501	23025659	241156	Intergenic	LINC00540	Present	Present	Present	Present	Present
chr13	23278072	23278265	194152	Intergenic	BASP1P1	Present	Present	Present	Present	Present
chr13	24024548	24024707	-16786	Intergenic	SACS	Present	Present	Present	Present	Present
chr13	24062804	24062953	19227	Intergenic	LINC00327	Present	Present	Present	Present	Present
chr13	24189951	24190095	36524	exon	TNFRSF19	Present	Present	Present	Present	Present
chr13	24613299	24613481	59449	intron	SPATA13	Present	Present	Present	Present	Present
chr13	26266404	26266550	223565	intron	ATP8A2	Present	Present	Present	Present	Present
chr13	26456077	26456390	168965	intron	SHISA2	Present	Present	Present	Present	Present
chr13	27033866	27034127	-97824	Intergenic	WASF3	Present	Present	Present	Present	Present
chr13	27034839	27035039	-96881	Intergenic	WASF3	Present	Present	Present	Present	Present
chr13	27540134	27540407	-159400	Intergenic	USP12-AS1	Present	Present	Present	Present	Present
chr13	27581539	27581617	-118092	Intergenic	USP12-AS1	Present	Present	Present	Present	Present
chr13	28892646	28892811	176537	intron	FLT1	Present	Present	Present	Present	Present
chr13	30015293	30015736	12717	intron	MTUS2	Present	Present	Present	Present	Present
chr13	30022337	30022721	19732	intron	MTUS2	Present	Present	Present	Present	Present
chr13	30024047	30024210	21331	intron	MTUS2	Present	Present	Present	Present	Present
chr13	30071422	30071789	-9718	intron	MTUS2-AS1	Present	Present	Present	Present	Present
chr13	30476577	30476758	-14125	Intergenic	LINC00297	Present	Present	Present	Present	Present
chr13	31311796	31311950	2228	intron	ALOX5AP	Present	Present	Present	Present	Present
chr13	31404096	31404476	26943	Intergenic	LINC00398	Present	Present	Present	Present	Present
chr13	31407215	31407448	29988	Intergenic	LINC00398	Present	Present	Present	Present	Present
chr13	31439586	31439792	-17010	Intergenic	LINC00545	Present	Present	Present	Present	Present
chr13	31621270	31621433	114558	Intergenic	TEX26	Present	Present	Present	Present	Present
chr13	32470580	32470854	49797	intron	EEF1DP3	Present	Present	Present	Present	Present
chr13	32519907	32520041	85802	intron	FRY-AS1	Present	Present	Present	Present	Present
chr13	32890052	32890262	540	intron	BRCA2	Present	Present	Present	Present	Present
chr13	33700351	33700544	59781	intron	STARD13	Present	Present	Present	Present	Present
chr13	33711979	33712057	48210	intron	STARD13	Present	Present	Present	Present	Present
chr13	33713355	33713526	46788	intron	STARD13	Present	Present	Present	Present	Present
chr13	33803840	33804289	-23877	intron	STARD13	Present	Present	Present	Present	Present
chr13	33926777	33926938	-17454	intron	LINC02344	Present	Present	Present	Present	Present
chr13	34185168	34185464	65615	intron	STARD13	Present	Present	Present	Present	Present
chr13	36342253	36342535	70530	TTS	LINC00445	Present	Present	Present	Present	Present
chr13	36919899	36920085	539	promoter-TSS	SPART	Present	Present	Present	Present	Present
chr13	37332638	37332813	-60614	Intergenic	RFXAP	Present	Present	Present	Present	Present
chr13	39092601	39092756	-49183	Intergenic	LINC00366	Present	Present	Present	Present	Present
chr13	39554081	39554238	10809	intron	STOML3	Present	Present	Present	Present	Present
chr13	40807791	40808285	-13399	Intergenic	LINC00548	Present	Present	Present	Present	Present
chr13	40945917	40946091	109139	intron	LINC00598	Present	Present	Present	Present	Present
chr13	41015466	41015666	39577	intron	LINC00598	Present	Present	Present	Present	Present
chr13	41030671	41030957	24329	intron	LINC00598	Present	Present	Present	Present	Present
chr13	43881902	43882164	-140955	intron	ENOX1-AS2	Present	Present	Present	Present	Present
chr13	45505432	45505604	58088	Intergenic	NUFIP1	Present	Present	Present	Present	Present
chr13	46355692	46356089	69998	3'UTR	SIAH3	Present	Present	Present	Present	Present
chr13	51889869	51890181	-25143	Intergenic	SERPINE3	Present	Present	Present	Present	Present
chr13	52360289	52360513	17897	intron	DHRS12	Present	Present	Present	Present	Present
chr13	74340220	74340402	201930	intron	LINC00392	Present	Present	Present	Present	Present
chr13	76259554	76259725	49173	intron	LMO7	Present	Present	Present	Present	Present
chr13	78946721	78946875	-223459	intron	LOC780529	Present	Present	Present	Present	Present
chr13	80357050	80357271	-21361	Intergenic	LINC01038	Present	Present	Present	Present	Present
chr13	83033811	83033940	-1232757	Intergenic	LINC00564	Present	Present	Present	Present	Present
chr13	95923601	95923705	30047	intron	ABCC4	Present	Present	Present	Present	Present
chr13	106650484	106650579	291352	Intergenic	LINC00343	Present	Present	Present	Present	Present
chr13	107638506	107638775	332412	Intergenic	LINC00443	Present	Present	Present	Present	Present
chr13	111064571	111064774	50962	intron	COL4A2-AS2	Present	Present	Present	Present	Present
chr14	21149776	21149923	-2487	Intergenic	ANG	Present	Present	Present	Present	Present
chr14	21151491	21151654	-764	promoter-TSS	ANG	Present	Present	Present	Present	Present
chr14	23290166	23290264	-1195	Intergenic	SLC7A7	Present	Present	Present	Present	Present
chr14	25580650	25580799	-61221	Intergenic	STXBP6	Present	Present	Present	Present	Present
chr14	33197162	33197345	-210832	intron	NPAS3	Present	Present	Present	Present	Present
chr14	34823736	34823941	107608	Intergenic	SPTSSA	Present	Present	Present	Present	Present
chr14	39086251	39086375	-265486	Intergenic	LOC105370457	Present	Present	Present	Present	Present
chr14	61669920	61670124	78034	Intergenic	TMEM30B	Present	Present	Present	Present	Present
chr14	68711413	68711545	384025	intron	LOC100996664	Present	Present	Present	Present	Present
chr14	69030272	69030445	65146	intron	LOC100996664	Present	Present	Present	Present	Present
chr14	69273970	69274257	-11153	Intergenic	ZFP36L1	Present	Present	Present	Present	Present
chr14	72178314	72178463	125373	intron	SIPA1L1	Present	Present	Present	Present	Present
chr14	75716183	75716354	-29263	Intergenic	FOS	Present	Present	Present	Present	Present
chr14	76114835	76114992	12306	TTS	ERG28	Present	Present	Present	Present	Present
chr14	80932141	80932418	-234879	Intergenic	DIO2	Present	Present	Present	Present	Present
chr14	81916443	81916619	-30	promoter-TSS	LINC02308	Present	Present	Present	Present	Present
chr14	91075524	91075774	-33324	intron	LOC101928909	Present	Present	Present	Present	Present
chr14	91107554	91107723	-1335	intron	LOC101928909	Present	Present	Present	Present	Present
chr14	91112497	91112703	3627	intron	LOC101928909	Present	Present	Present	Present	Present
chr14	95963950	95964235	-21920	Intergenic	SYNE3	Present	Present	Present	Present	Present
chr14	99513898	99514044	224563	Intergenic	BCL11B	Present	Present	Present	Present	Present
chr15	21913462	21913743	27137	Intergenic	LOC646214	Present	Present	Present	Present	Present
chr15	21916046	21916436	24498	Intergenic	LOC646214	Present	Present	Present	Present	Present
chr15	22446170	22446708	2442	Intergenic	LOC102724760	Present	Present	Present	Present	Present
chr15	31558747	31558977	-35797	Intergenic	LOC283710	Present	Present	Present	Present	Present
chr15	33418793	33419065	-58554	intron	FMN1	Present	Present	Present	Present	Present
chr15	33694913	33695167	91872	intron	RYR3	Present	Present	Present	Present	Present
chr15	34993811	34994030	-45955	Intergenic	LINC02252	Present	Present	Present	Present	Present
chr15	35014241	35014650	32754	Intergenic	GJD2	Present	Present	Present	Present	Present
chr15	35017863	35018170	29183	Intergenic	GJD2	Present	Present	Present	Present	Present
chr15	35091562	35092312	-4187	intron	ACTC1	Present	Present	Present	Present	Present
chr15	35261939	35262092	-72	promoter-TSS	AQR	Present	Present	Present	Present	Present
chr15	39171261	39171452	182557	Intergenic		Present	Present	Present	Present	Present
chr15	39233646	39234040	245044	Intergenic		Present	Present	Present	Present	Present
chr15	39387750	39387917	-155037	Intergenic	C15orf54	Present	Present	Present	Present	Present
chr15	39655556	39655694	112755	Intergenic	C15orf54	Present	Present	Present	Present	Present
chr15	40385666	40385901	12504	intron	BMF	Present	Present	Present	Present	Present
chr15	40391049	40391236	7145	intron	BMF	Present	Present	Present	Present	Present
chr15	40442484	40442657	-10640	Intergenic	BUB1B	Present	Present	Present	Present	Present
chr15	42357378	42357560	-14568	Intergenic	PLA2G4E	Present	Present	Present	Present	Present
chr15	57803007	57803161	-81018	intron	MYZAP	Present	Present	Present	Present	Present
chr15	58023169	58023321	24333	Intergenic	POLR2M	Present	Present	Present	Present	Present
chr15	58624458	58624605	-99659	Intergenic	LIPC	Present	Present	Present	Present	Present
chr15	58746213	58746988	22410	intron	LIPC	Present	Present	Present	Present	Present
chr15	58751846	58752091	27778	intron	LIPC	Present	Present	Present	Present	Present
chr15	58767790	58768029	23025	intron	LIPC-AS1	Present	Present	Present	Present	Present
chr15	58803422	58803763	-12658	intron	LIPC-AS1	Present	Present	Present	Present	Present
chr15	58841390	58841705	-50613	intron	LIPC-AS1	Present	Present	Present	Present	Present
chr15	70153409	70153689	25976	Intergenic	LINC00593	Present	Present	Present	Present	Present
chr15	71927206	71927426	56562	intron	THSD4-AS2	Present	Present	Present	Present	Present
chr15	77389901	77390114	-26556	Intergenic	TSPAN3	Present	Present	Present	Present	Present
chr15	78316410	78316599	-29937	exon	LOC91450	Present	Present	Present	Present	Present
chr15	80325749	80325973	-26049	Intergenic	ZFAND6	Present	Present	Present	Present	Present
chr15	82207100	82207524	131047	Intergenic	MEX3B	Present	Present	Present	Present	Present
chr15	88266500	88266750	146465	Intergenic	LINC00052	Present	Present	Present	Present	Present
chr15	89028128	89028266	17258	Intergenic	MRPS11	Present	Present	Present	Present	Present
chr15	93064932	93065061	50089	Intergenic	C15orf32	Present	Present	Present	Present	Present
chr15	93081470	93081649	33934	Intergenic	LINC00930	Present	Present	Present	Present	Present
chr15	93084508	93085123	30678	Intergenic	LINC00930	Present	Present	Present	Present	Present
chr15	93160674	93161224	38056	3'UTR	FAM174B	Present	Present	Present	Present	Present
chr15	93166541	93167091	32189	intron	FAM174B	Present	Present	Present	Present	Present
chr15	93167679	93168224	31054	intron	FAM174B	Present	Present	Present	Present	Present
chr15	93173653	93173819	25269	intron	FAM174B	Present	Present	Present	Present	Present
chr15	93180938	93181242	17915	intron	FAM174B	Present	Present	Present	Present	Present
chr15	93181553	93181803	17327	intron	FAM174B	Present	Present	Present	Present	Present
chr15	93193506	93193667	5419	intron	FAM174B	Present	Present	Present	Present	Present
chr15	93197458	93197631	1461	intron	FAM174B	Present	Present	Present	Present	Present
chr15	93210510	93210844	-11672	Intergenic	FAM174B	Present	Present	Present	Present	Present
chr15	93344687	93344855	6057	Intergenic	ASB9P1	Present	Present	Present	Present	Present
chr15	93375004	93375308	36442	Intergenic	ASB9P1	Present	Present	Present	Present	Present
chr15	93383030	93383234	-42941	Intergenic	LINC01578	Present	Present	Present	Present	Present
chr15	93425441	93425612	-547	promoter-TSS	LINC01578	Present	Present	Present	Present	Present
chr15	93443296	93443779	-17	promoter-TSS	CHD2	Present	Present	Present	Present	Present
chr15	93461246	93461393	13690	intron	MIR3175	Present	Present	Present	Present	Present
chr15	93580637	93581170	35482	3'UTR	RGMA	Present	Present	Present	Present	Present
chr15	93631126	93631307	536	intron	RGMA	Present	Present	Present	Present	Present
chr15	93709095	93709247	-40124	Intergenic	LOC105370980	Present	Present	Present	Present	Present
chr15	93760644	93760833	11443	Intergenic	LOC105370980	Present	Present	Present	Present	Present
chr15	93808283	93808817	59255	Intergenic	LOC105370980	Present	Present	Present	Present	Present
chr15	93925583	93925908	176450	Intergenic	LOC105370980	Present	Present	Present	Present	Present
chr15	94063507	94063749	314333	Intergenic	LOC105370980	Present	Present	Present	Present	Present
chr15	94097047	94097148	-302692	Intergenic	LINC02207	Present	Present	Present	Present	Present
chr15	94130514	94130694	-269185	Intergenic	LINC02207	Present	Present	Present	Present	Present
chr15	94201735	94201902	-197971	Intergenic	LINC02207	Present	Present	Present	Present	Present
chr15	94350185	94350338	-49528	Intergenic	LINC02207	Present	Present	Present	Present	Present
chr15	94408950	94409129	9250	intron	LINC02207	Present	Present	Present	Present	Present
chr15	94523500	94523724	79682	intron	LINC01580	Present	Present	Present	Present	Present
chr15	94533045	94533206	89195	intron	LINC01580	Present	Present	Present	Present	Present
chr15	94613669	94613934	37366	intron	LINC01581	Present	Present	Present	Present	Present
chr15	95220400	95221087	-177849	Intergenic	LOC440311	Present	Present	Present	Present	Present
chr15	95633106	95633347	234634	Intergenic	LOC440311	Present	Present	Present	Present	Present
chr15	95770187	95770357	100057	Intergenic	LINC01197	Present	Present	Present	Present	Present
chr15	95790521	95790650	79744	Intergenic	LINC01197	Present	Present	Present	Present	Present
chr15	95803251	95803575	66916	Intergenic	LINC01197	Present	Present	Present	Present	Present
chr15	95828320	95828467	41936	intron	LINC01197	Present	Present	Present	Present	Present
chr15	95836106	95836423	34065	intron	LINC01197	Present	Present	Present	Present	Present
chr15	95840102	95840290	30133	intron	LINC01197	Present	Present	Present	Present	Present
chr15	95847021	95847164	23237	intron	LINC01197	Present	Present	Present	Present	Present
chr15	95847248	95847313	23049	intron	LINC01197	Present	Present	Present	Present	Present
chr15	96386534	96387036	284285	Intergenic	LOC105369212	Present	Present	Present	Present	Present
chr15	96474227	96474588	196663	Intergenic	LOC105369212	Present	Present	Present	Present	Present
chr15	96483756	96484193	187096	Intergenic	LOC105369212	Present	Present	Present	Present	Present
chr15	96579900	96580206	91017	Intergenic	LOC105369212	Present	Present	Present	Present	Present
chr15	96597100	96597270	73885	Intergenic	LOC105369212	Present	Present	Present	Present	Present
chr15	96828616	96828777	-40579	intron	NR2F2	Present	Present	Present	Present	Present
chr15	96873317	96873519	-511	promoter-TSS	NR2F2	Present	Present	Present	Present	Present
chr15	98667270	98667416	-35361	Intergenic	LINC01582	Present	Present	Present	Present	Present
chr15	99190370	99190527	-1320	non-coding	IGF1R	Present	Present	Present	Present	Present
chr15	99243866	99244063	-49514	intron	IRAIN	Present	Present	Present	Present	Present
chr15	99320015	99320432	-7432	intron	MIR4714	Present	Present	Present	Present	Present
chr15	99322951	99323196	-4582	intron	MIR4714	Present	Present	Present	Present	Present
chr15	99343939	99344109	16369	intron	MIR4714	Present	Present	Present	Present	Present
chr15	99344545	99344747	16991	intron	MIR4714	Present	Present	Present	Present	Present
chr15	99396528	99396674	68946	intron	MIR4714	Present	Present	Present	Present	Present
chr15	99560408	99560591	2566	intron	LUNAR1	Present	Present	Present	Present	Present
chr15	99605358	99605403	-39906	Intergenic	SYNM	Present	Present	Present	Present	Present
chr15	99663937	99664416	18890	intron	SYNM	Present	Present	Present	Present	Present
chr15	99791296	99791430	67	promoter-TSS	TTC23	Present	Present	Present	Present	Present
chr15	99846410	99846572	48761	intron	HSP90B2P	Present	Present	Present	Present	Present
chr15	99847013	99847160	49356	intron	HSP90B2P	Present	Present	Present	Present	Present
chr15	99988133	99988265	-117423	Intergenic	MEF2A	Present	Present	Present	Present	Present
chr15	100047636	100047891	-57859	Intergenic	MEF2A	Present	Present	Present	Present	Present
chr15	100048010	100048172	-57531	Intergenic	MEF2A	Present	Present	Present	Present	Present
chr15	100052294	100052693	-53129	Intergenic	MEF2A	Present	Present	Present	Present	Present
chr15	100105953	100106118	-98	promoter-TSS	MEF2A	Present	Present	Present	Present	Present
chr15	100248891	100249054	24670	intron	LYSMD4	Present	Present	Present	Present	Present
chr15	100257549	100257982	15877	Intergenic	LYSMD4	Present	Present	Present	Present	Present
chr15	100258800	100258973	14756	Intergenic	LYSMD4	Present	Present	Present	Present	Present
chr15	100527060	100527191	179897	intron	LOC400464	Present	Present	Present	Present	Present
chr15	100656737	100656913	225355	intron	ADAMTS17	Present	Present	Present	Present	Present
chr15	100847602	100847700	34529	intron	ADAMTS17	Present	Present	Present	Present	Present
chr15	100847797	100847949	34307	intron	ADAMTS17	Present	Present	Present	Present	Present
chr15	101404021	101404347	2136	intron	LOC105369201	Present	Present	Present	Present	Present
chr15	101442719	101443205	16526	intron	LOC101927751	Present	Present	Present	Present	Present
chr15	101656433	101656579	135747	Intergenic	CHSY1	Present	Present	Present	Present	Present
chr15	101718937	101719048	73261	exon	CHSY1	Present	Present	Present	Present	Present
chr16	4460853	4461060	4942	intron	CORO7	Present	Present	Present	Present	Present
chr16	7401663	7401983	18977	intron	RBFOX1	Present	Present	Present	Present	Present
chr16	8811858	8812057	-2613	intron	ABAT	Present	Present	Present	Present	Present
chr16	12637323	12637469	-176782	intron	MIR4718	Present	Present	Present	Present	Present
chr16	14051327	14051484	37391	Intergenic	ERCC4	Present	Present	Present	Present	Present
chr16	15604204	15604425	8191	intron	BMERB1	Present	Present	Present	Present	Present
chr16	27338782	27338816	13504	intron	IL4R	Present	Present	Present	Present	Present
chr16	31076568	31076743	-246	promoter-TSS	ZNF668	Present	Present	Present	Present	Present
chr16	32606723	32607182	-54512	Intergenic	LOC105369266	Present	Present	Present	Present	Present
chr16	49598942	49599074	-46512	intron	ADAM3B	Present	Present	Present	Present	Present
chr16	52469624	52469809	111339	TTS	TOX3	Present	Present	Present	Present	Present
chr16	55435073	55435257	61044	Intergenic	MMP2-AS1	Present	Present	Present	Present	Present
chr16	56895141	56895509	2895	Intergenic	MIR138-2	Present	Present	Present	Present	Present
chr16	66262688	66262954	-137773	Intergenic	CDH5	Present	Present	Present	Present	Present
chr16	68676746	68676944	-2368	Intergenic	CDH3	Present	Present	Present	Present	Present
chr16	78571527	78571678	438051	intron	WWOX	Present	Present	Present	Present	Present
chr16	78782395	78782717	649005	intron	WWOX	Present	Present	Present	Present	Present
chr16	79321079	79321485	313352	Intergenic	MAF	Present	Present	Present	Present	Present
chr16	79675042	79675187	-40480	Intergenic	MAF	Present	Present	Present	Present	Present
chr16	83751464	83751698	86000	intron	LOC102724163	Present	Present	Present	Present	Present
chr16	83766260	83766479	71212	intron	LOC102724163	Present	Present	Present	Present	Present
chr16	85170069	85170152	-646	promoter-TSS	LINC02139	Present	Present	Present	Present	Present
chr16	86229687	86229964	38	promoter-TSS	LINC01082	Present	Present	Present	Present	Present
chr16	86556325	86556602	12330	Intergenic	FOXF1	Present	Present	Present	Present	Present
chr16	86806213	86806505	50662	Intergenic	LINC02188	Present	Present	Present	Present	Present
chr16	86825422	86825569	69798	Intergenic	LINC02188	Present	Present	Present	Present	Present
chr16	87856346	87856510	11838	Intergenic	MIR6775	Present	Present	Present	Present	Present
chr17	5673272	5673382	-2227	Intergenic	LOC339166	Present	Present	Present	Present	Present
chr17	5673474	5673490	-2072	Intergenic	LOC339166	Present	Present	Present	Present	Present
chr17	6457949	6458045	1878	intron	PITPNM3	Present	Present	Present	Present	Present
chr17	9103177	9103431	-20869	intron	LOC101928266	Present	Present	Present	Present	Present
chr17	10287597	10287755	1227	intron	MYHAS	Present	Present	Present	Present	Present
chr17	13479483	13479643	25683	intron	HS3ST3A1	Present	Present	Present	Present	Present
chr17	15334404	15334841	36313	Intergenic	CDRT4	Present	Present	Present	Present	Present
chr17	15338113	15338276	32741	Intergenic	CDRT4	Present	Present	Present	Present	Present
chr17	15340004	15340254	30806	non-coding	CDRT4	Present	Present	Present	Present	Present
chr17	15393999	15394153	-19926	intron	CDRT3	Present	Present	Present	Present	Present
chr17	15814296	15814506	-33830	Intergenic	ADORA2B	Present	Present	Present	Present	Present
chr17	15824125	15824500	-23919	Intergenic	ADORA2B	Present	Present	Present	Present	Present
chr17	16392084	16392138	3396	intron	LRRC75A	Present	Present	Present	Present	Present
chr17	16415428	16415634	-20024	Intergenic	LRRC75A	Present	Present	Present	Present	Present
chr17	17288857	17289116	82299	Intergenic	NT5M	Present	Present	Present	Present	Present
chr17	17781294	17781440	-41042	intron	SREBF1	Present	Present	Present	Present	Present
chr17	17817356	17817450	58311	intron	TOM1L2	Present	Present	Present	Present	Present
chr17	25773868	25774136	-9472	Intergenic	KSR1	Present	Present	Present	Present	Present
chr17	25872678	25872781	73739	intron	KSR1	Present	Present	Present	Present	Present
chr17	25872946	25873092	74029	intron	KSR1	Present	Present	Present	Present	Present
chr17	25887695	25887925	-70404	intron	LGALS9	Present	Present	Present	Present	Present
chr17	27295377	27295982	-17143	intron	PHF12	Present	Present	Present	Present	Present
chr17	27365619	27365927	-4386	Intergenic	PIPOX	Present	Present	Present	Present	Present
chr17	27375564	27376177	5711	intron	PIPOX	Present	Present	Present	Present	Present
chr17	27378264	27378671	8308	intron	PIPOX	Present	Present	Present	Present	Present
chr17	27378785	27378871	8669	intron	PIPOX	Present	Present	Present	Present	Present
chr17	27379033	27379068	8891	intron	PIPOX	Present	Present	Present	Present	Present
chr17	27393127	27393390	9369	Intergenic	TIAF1	Present	Present	Present	Present	Present
chr17	27405507	27405778	-3015	intron	TIAF1	Present	Present	Present	Present	Present
chr17	27439180	27439478	28078	intron	MYO18A	Present	Present	Present	Present	Present
chr17	30005471	30005761	103186	Intergenic	MIR365B	Present	Present	Present	Present	Present
chr17	38463663	38463826	-1688	Intergenic	RARA	Present	Present	Present	Present	Present
chr17	39228261	39228435	-6217	Intergenic	KRTAP2-4	Present	Present	Present	Present	Present
chr17	40713881	40713900	-276	promoter-TSS	COASY	Present	Present	Present	Present	Present
chr17	41150250	41150401	35	promoter-TSS	RPL27	Present	Present	Present	Present	Present
chr17	41400514	41400634	-19512	Intergenic	CCDC200	Present	Present	Present	Present	Present
chr17	41534274	41534451	12188	Intergenic	MIR2117	Present	Present	Present	Present	Present
chr17	41734048	41734311	4752	intron	MEOX1	Present	Present	Present	Present	Present
chr17	41957676	41957893	20208	intron	MPP2	Present	Present	Present	Present	Present
chr17	42127079	42127351	16824	intron	LSM12	Present	Present	Present	Present	Present
chr17	42183350	42183667	-9772	intron	LOC105371789	Present	Present	Present	Present	Present
chr17	42681597	42681747	46045	Intergenic	LINC01180	Present	Present	Present	Present	Present
chr17	54680107	54680172	9079	Intergenic	NOG	Present	Present	Present	Present	Present
chr17	54680404	54680409	9346	Intergenic	NOG	Present	Present	Present	Present	Present
chr17	55657873	55658074	27800	intron	LOC101927539	Present	Present	Present	Present	Present
chr17	66573527	66573651	-19021	intron	FAM20A	Present	Present	Present	Present	Present
chr17	76311710	76311772	-37168	Intergenic	LINC01993	Present	Present	Present	Present	Present
chr17	78363605	78363819	-25255	exon	ENDOV	Present	Present	Present	Present	Present
chr17	80296713	80296867	-5148	Intergenic	SECTM1	Present	Present	Present	Present	Present
chr18	20805633	20805821	69938	intron	CABLES1	Present	Present	Present	Present	Present
chr18	20824445	20824698	88782	intron	CABLES1	Present	Present	Present	Present	Present
chr18	22285373	22285491	-20313	Intergenic	LOC105372028	Present	Present	Present	Present	Present
chr18	23317782	23318466	352453	Intergenic	SS18	Present	Present	Present	Present	Present
chr18	23378015	23378185	292477	Intergenic	SS18	Present	Present	Present	Present	Present
chr18	36039093	36039286	802091	Intergenic	MIR4318	Present	Present	Present	Present	Present
chr18	40194700	40194868	428151	intron	LINC00907	Present	Present	Present	Present	Present
chr18	42369798	42369948	109020	intron	SETBP1	Present	Present	Present	Present	Present
chr18	42431814	42432000	118224	intron	MIR4319	Present	Present	Present	Present	Present
chr18	42432096	42432162	118002	intron	MIR4319	Present	Present	Present	Present	Present
chr18	42432781	42433004	117239	intron	MIR4319	Present	Present	Present	Present	Present
chr18	42476917	42477114	73116	intron	MIR4319	Present	Present	Present	Present	Present
chr18	62903637	62903844	-513748	Intergenic	CDH7	Present	Present	Present	Present	Present
chr18	63404765	63404901	-12655	Intergenic	CDH7	Present	Present	Present	Present	Present
chr18	69874662	69874824	336834	Intergenic	CBLN2	Present	Present	Present	Present	Present
chr18	70042885	70043152	168559	Intergenic	CBLN2	Present	Present	Present	Present	Present
chr18	74885371	74885552	-40722	Intergenic	MBP	Present	Present	Present	Present	Present
chr18	77616735	77616923	-6839	Intergenic	KCNG2	Present	Present	Present	Present	Present
chr19	30883031	30883235	19842	intron	ZNF536	Present	Present	Present	Present	Present
chr19	30941086	30941260	77882	intron	ZNF536	Present	Present	Present	Present	Present
chr19	31202283	31202518	339109	3'UTR	ZNF536	Present	Present	Present	Present	Present
chr19	31651206	31651552	-7037	intron	LINC01791	Present	Present	Present	Present	Present
chr19	31705109	31705280	46778	intron	LINC01791	Present	Present	Present	Present	Present
chr19	31744980	31745664	86906	intron	LINC01791	Present	Present	Present	Present	Present
chr19	31746215	31746623	88003	intron	LINC01791	Present	Present	Present	Present	Present
chr19	31748698	31748881	90373	intron	LINC01791	Present	Present	Present	Present	Present
chr19	31869320	31869705	-29170	Intergenic	TSHZ3	Present	Present	Present	Present	Present
chr19	31939119	31939566	-99000	Intergenic	TSHZ3	Present	Present	Present	Present	Present
chr19	31942912	31943154	-102691	Intergenic	TSHZ3	Present	Present	Present	Present	Present
chr19	32399652	32399818	-117033	Intergenic	LINC01533	Present	Present	Present	Present	Present
chr19	34213451	34213664	38123	intron	CHST8	Present	Present	Present	Present	Present
chr19	34218439	34218770	43170	intron	CHST8	Present	Present	Present	Present	Present
chr19	34222761	34223283	47588	intron	CHST8	Present	Present	Present	Present	Present
chr19	38761351	38761662	6293	intron	SPINT2	Present	Present	Present	Present	Present
chr19	39376657	39376759	-7793	intron	RINL	Present	Present	Present	Present	Present
chr19	57568334	57568719	-62983	Intergenic	USP29	Present	Present	Present	Present	Present
chr2	1656909	1657143	91261	intron	PXDN	Present	Present	Present	Present	Present
chr2	1690367	1690838	57685	intron	PXDN	Present	Present	Present	Present	Present
chr2	1795913	1796262	-47800	exon	PXDN	Present	Present	Present	Present	Present
chr2	3451758	3451900	68364	intron	TRAPPC12	Present	Present	Present	Present	Present
chr2	6767483	6767579	6388	intron	LINC01246	Present	Present	Present	Present	Present
chr2	10554159	10554340	32726	intron	SNORA80B	Present	Present	Present	Present	Present
chr2	12493092	12493237	153908	intron	MIR3681	Present	Present	Present	Present	Present
chr2	16133442	16133691	-51011	Intergenic	MYCNOS	Present	Present	Present	Present	Present
chr2	16177832	16178174	-12546	Intergenic	GACAT3	Present	Present	Present	Present	Present
chr2	16178697	16179144	-11629	Intergenic	GACAT3	Present	Present	Present	Present	Present
chr2	16191203	16191454	779	intron	GACAT3	Present	Present	Present	Present	Present
chr2	16383250	16383535	192843	Intergenic	GACAT3	Present	Present	Present	Present	Present
chr2	16386262	16386631	195897	Intergenic	GACAT3	Present	Present	Present	Present	Present
chr2	16408384	16408547	217916	Intergenic	GACAT3	Present	Present	Present	Present	Present
chr2	16703580	16703774	143425	Intergenic	FAM49A	Present	Present	Present	Present	Present
chr2	18228531	18228667	168665	Intergenic	KCNS3	Present	Present	Present	Present	Present
chr2	18229255	18229664	169525	Intergenic	KCNS3	Present	Present	Present	Present	Present
chr2	20760992	20761161	31232	Intergenic	HS1BP3-IT1	Present	Present	Present	Present	Present
chr2	20779080	20779398	13069	Intergenic	HS1BP3-IT1	Present	Present	Present	Present	Present
chr2	20784360	20784560	7848	Intergenic	HS1BP3-IT1	Present	Present	Present	Present	Present
chr2	20822527	20822821	28184	intron	HS1BP3	Present	Present	Present	Present	Present
chr2	20847528	20847709	3240	intron	HS1BP3	Present	Present	Present	Present	Present
chr2	21478996	21479186	132233	Intergenic	TDRD15	Present	Present	Present	Present	Present
chr2	23650789	23651095	42892	intron	KLHL29	Present	Present	Present	Present	Present
chr2	23757683	23758144	149863	intron	KLHL29	Present	Present	Present	Present	Present
chr2	23807025	23807225	199075	intron	KLHL29	Present	Present	Present	Present	Present
chr2	24634056	24634136	-50691	Intergenic	ITSN2	Present	Present	Present	Present	Present
chr2	24658935	24659104	-55104	Intergenic	NCOA1	Present	Present	Present	Present	Present
chr2	24944432	24944662	-71437	intron	CENPO	Present	Present	Present	Present	Present
chr2	25526771	25527009	24700	intron	MIR1301	Present	Present	Present	Present	Present
chr2	28914634	28914954	44277	Intergenic	LOC100505774	Present	Present	Present	Present	Present
chr2	29698405	29698712	-315	promoter-TSS	LOC105374389	Present	Present	Present	Present	Present
chr2	30044527	30044766	99806	intron	ALK	Present	Present	Present	Present	Present
chr2	37995757	37996264	60844	Intergenic	LINC00211	Present	Present	Present	Present	Present
chr2	38014114	38014316	42639	Intergenic	LINC00211	Present	Present	Present	Present	Present
chr2	39923282	39923556	30362	intron	TMEM178A	Present	Present	Present	Present	Present
chr2	42159453	42159630	1322	intron	LINC01914	Present	Present	Present	Present	Present
chr2	42257443	42257613	-17633	Intergenic	PKDCC	Present	Present	Present	Present	Present
chr2	42299589	42299772	24519	Intergenic	PKDCC	Present	Present	Present	Present	Present
chr2	42569673	42569868	17408	intron	COX7A2L	Present	Present	Present	Present	Present
chr2	43013372	43013575	6250	intron	HAAO	Present	Present	Present	Present	Present
chr2	46165998	46166225	287297	intron	PRKCE	Present	Present	Present	Present	Present
chr2	55347932	55348097	16953	intron	RTN4	Present	Present	Present	Present	Present
chr2	60591890	60592067	18193	intron	MIR4432HG	Present	Present	Present	Present	Present
chr2	60593468	60593655	16610	intron	MIR4432HG	Present	Present	Present	Present	Present
chr2	66532839	66533214	52434	Intergenic	MIR4778	Present	Present	Present	Present	Present
chr2	67876924	67877057	175704	Intergenic	LINC01812	Present	Present	Present	Present	Present
chr2	68998392	68998939	-3377	intron	ARHGAP25	Present	Present	Present	Present	Present
chr2	69038600	69038824	36670	intron	ARHGAP25	Present	Present	Present	Present	Present
chr2	69116548	69117043	-18266	Intergenic	BMP10	Present	Present	Present	Present	Present
chr2	69404471	69404653	73748	intron	MIR3126	Present	Present	Present	Present	Present
chr2	75303366	75303522	-14495	intron	MIR5000	Present	Present	Present	Present	Present
chr2	85732154	85732346	33759	Intergenic	PARTICL	Present	Present	Present	Present	Present
chr2	85971969	85972250	-9005	Intergenic	ATOH8	Present	Present	Present	Present	Present
chr2	86528949	86529219	35665	intron	REEP1	Present	Present	Present	Present	Present
chr2	98614385	98614583	-2073	Intergenic	TMEM131	Present	Present	Present	Present	Present
chr2	101770432	101770607	2397	non-coding	TBC1D8-AS1	Present	Present	Present	Present	Present
chr2	102056687	102057055	34703	intron	RFX8	Present	Present	Present	Present	Present
chr2	102232902	102233132	-81148	Intergenic	MAP4K4	Present	Present	Present	Present	Present
chr2	106054814	106054905	111	5'UTR	FHL2	Present	Present	Present	Present	Present
chr2	106055046	106055250	-178	promoter-TSS	FHL2	Present	Present	Present	Present	Present
chr2	106637478	106637767	-44522	Intergenic	ECRG4	Present	Present	Present	Present	Present
chr2	108035236	108035458	-69366	Intergenic	MIR548AU	Present	Present	Present	Present	Present
chr2	108298476	108298674	-71993	Intergenic	GACAT1	Present	Present	Present	Present	Present
chr2	110052684	110052859	-122690	intron	MIR4266	Present	Present	Present	Present	Present
chr2	110097578	110097895	-167655	intron	MIR4266	Present	Present	Present	Present	Present
chr2	114735757	114735971	-1282	non-coding	LINC01191	Present	Present	Present	Present	Present
chr2	120453735	120453893	17037	intron	TMEM177	Present	Present	Present	Present	Present
chr2	121577846	121578029	28080	intron	GLI2	Present	Present	Present	Present	Present
chr2	122323120	122323312	34760	intron	RNU4ATAC	Present	Present	Present	Present	Present
chr2	128128767	128128975	-28066	Intergenic	MAP3K2	Present	Present	Present	Present	Present
chr2	133081740	133081886	17096	Intergenic	ZNF806	Present	Present	Present	Present	Present
chr2	135130322	135130512	118774	intron	MGAT5	Present	Present	Present	Present	Present
chr2	136763518	136763772	-20391	TTS	DARS	Present	Present	Present	Present	Present
chr2	136789398	136789589	-46239	Intergenic	DARS	Present	Present	Present	Present	Present
chr2	136803962	136804184	-60819	Intergenic	DARS	Present	Present	Present	Present	Present
chr2	136806591	136806886	-63484	Intergenic	DARS	Present	Present	Present	Present	Present
chr2	136809943	136810141	63763	Intergenic	CXCR4	Present	Present	Present	Present	Present
chr2	136816646	136816792	57086	Intergenic	CXCR4	Present	Present	Present	Present	Present
chr2	136823221	136823350	50520	Intergenic	CXCR4	Present	Present	Present	Present	Present
chr2	136899218	136899371	-23569	Intergenic	CXCR4	Present	Present	Present	Present	Present
chr2	136991908	136992239	-116348	Intergenic	CXCR4	Present	Present	Present	Present	Present
chr2	136996004	136996388	-120471	Intergenic	CXCR4	Present	Present	Present	Present	Present
chr2	137090135	137090758	-214721	Intergenic	CXCR4	Present	Present	Present	Present	Present
chr2	137134410	137134691	-258825	Intergenic	CXCR4	Present	Present	Present	Present	Present
chr2	137139914	137140203	-264333	Intergenic	CXCR4	Present	Present	Present	Present	Present
chr2	139502498	139502648	35387	intron	NXPH2	Present	Present	Present	Present	Present
chr2	144185843	144186012	298939	intron	ARHGAP15	Present	Present	Present	Present	Present
chr2	144232798	144232986	345904	intron	ARHGAP15	Present	Present	Present	Present	Present
chr2	145159897	145160054	-69339	intron	GTDC1	Present	Present	Present	Present	Present
chr2	145161549	145161794	-71035	exon	GTDC1	Present	Present	Present	Present	Present
chr2	145162316	145162493	-71768	exon	GTDC1	Present	Present	Present	Present	Present
chr2	145189002	145189223	-88069	intron	ZEB2-AS1	Present	Present	Present	Present	Present
chr2	146138240	146138395	712783	Intergenic	TEX41	Present	Present	Present	Present	Present
chr2	148208394	148208579	-393600	Intergenic	ACVR2A	Present	Present	Present	Present	Present
chr2	158549390	158549622	-64130	Intergenic	ACVR1C	Present	Present	Present	Present	Present
chr2	158695741	158695868	-662	promoter-TSS	ACVR1	Present	Present	Present	Present	Present
chr2	161071231	161071299	-14441	Intergenic	ITGB6	Present	Present	Present	Present	Present
chr2	174455063	174455349	235606	Intergenic	CDCA7	Present	Present	Present	Present	Present
chr2	174472461	174472617	252939	Intergenic	CDCA7	Present	Present	Present	Present	Present
chr2	178052485	178052667	24563	Intergenic	LOC105373759	Present	Present	Present	Present	Present
chr2	181111100	181111319	-239185	Intergenic	CWC22	Present	Present	Present	Present	Present
chr2	182275838	182276092	-45654	Intergenic	ITGA4	Present	Present	Present	Present	Present
chr2	182439111	182439254	82650	intron	CERKL	Present	Present	Present	Present	Present
chr2	186933197	186933203	17844	intron	LINC01473	Present	Present	Present	Present	Present
chr2	192798078	192798234	-86342	Intergenic	CAVIN2	Present	Present	Present	Present	Present
chr2	195232240	195232453	23353	intron	LINC01821	Present	Present	Present	Present	Present
chr2	201042853	201043087	-127632	Intergenic	SPATS2L	Present	Present	Present	Present	Present
chr2	204596876	204597048	25600	intron	CD28	Present	Present	Present	Present	Present
chr2	204672844	204672957	-59594	Intergenic	CTLA4	Present	Present	Present	Present	Present
chr2	205230647	205230807	-179471	Intergenic	PARD3B	Present	Present	Present	Present	Present
chr2	206713592	206713738	166440	Intergenic	NRP2	Present	Present	Present	Present	Present
chr2	206723823	206723916	176644	Intergenic	NRP2	Present	Present	Present	Present	Present
chr2	206730640	206730752	183471	Intergenic	NRP2	Present	Present	Present	Present	Present
chr2	206730913	206731090	183776	Intergenic	NRP2	Present	Present	Present	Present	Present
chr2	206773268	206773478	177525	Intergenic	INO80D	Present	Present	Present	Present	Present
chr2	206802076	206802275	148723	Intergenic	INO80D	Present	Present	Present	Present	Present
chr2	207920064	207920277	54627	Intergenic	MIR2355	Present	Present	Present	Present	Present
chr2	218487015	218487242	134188	intron	DIRC3	Present	Present	Present	Present	Present
chr2	219952077	219952380	-26585	intron	IHH	Present	Present	Present	Present	Present
chr2	221080504	221080900	-309416	Intergenic	MIR4268	Present	Present	Present	Present	Present
chr2	221093413	221093578	-322209	Intergenic	MIR4268	Present	Present	Present	Present	Present
chr2	221720164	221720341	716772	Intergenic	EPHA4	Present	Present	Present	Present	Present
chr2	222902012	222902258	-260731	Intergenic	CCDC140	Present	Present	Present	Present	Present
chr2	222941802	222942101	-220915	Intergenic	CCDC140	Present	Present	Present	Present	Present
chr2	223000905	223001245	-161791	Intergenic	CCDC140	Present	Present	Present	Present	Present
chr2	223148339	223148630	-14382	intron	CCDC140	Present	Present	Present	Present	Present
chr2	223313524	223313846	24423	intron	SGPP2	Present	Present	Present	Present	Present
chr2	223618143	223618504	81946	Intergenic	MOGAT1	Present	Present	Present	Present	Present
chr2	225177557	225177807	89029	Intergenic	FAM124B	Present	Present	Present	Present	Present
chr2	225713299	225713446	98394	intron	DOCK10	Present	Present	Present	Present	Present
chr2	226219165	226219259	-45214	Intergenic		Present	Present	Present	Present	Present
chr2	226685608	226685778	-321817	Intergenic	LOC646736	Present	Present	Present	Present	Present
chr2	227624054	227624235	39362	intron	IRS1	Present	Present	Present	Present	Present
chr2	227738082	227738279	37410	intron	RHBDD1	Present	Present	Present	Present	Present
chr2	237781709	237781922	182995	Intergenic	LOC93463	Present	Present	Present	Present	Present
chr2	238578304	238578460	-22425	intron	LRRFIP1	Present	Present	Present	Present	Present
chr20	1428976	1429159	19270	intron	NSFL1C	Present	Present	Present	Present	Present
chr20	3441803	3442107	-9710	Intergenic	ATRN	Present	Present	Present	Present	Present
chr20	17171016	17171231	-35629	Intergenic	PCSK2	Present	Present	Present	Present	Present
chr20	19482870	19483116	-217753	intron	LOC100130264	Present	Present	Present	Present	Present
chr20	19583420	19583592	-283659	intron	RIN2	Present	Present	Present	Present	Present
chr20	19601140	19601448	-265871	intron	RIN2	Present	Present	Present	Present	Present
chr20	19767002	19767178	-100075	Intergenic	RIN2	Present	Present	Present	Present	Present
chr20	19809018	19809164	-58074	Intergenic	RIN2	Present	Present	Present	Present	Present
chr20	22269746	22269918	-6393	Intergenic	LINC01427	Present	Present	Present	Present	Present
chr20	22410759	22411080	-9638	Intergenic	LOC284788	Present	Present	Present	Present	Present
chr20	22411437	22411710	-10292	Intergenic	LOC284788	Present	Present	Present	Present	Present
chr20	23042376	23042560	-12167	Intergenic	THBD	Present	Present	Present	Present	Present
chr20	24362656	24362803	-87106	Intergenic	SYNDIG1	Present	Present	Present	Present	Present
chr20	24369690	24369873	-80054	Intergenic	SYNDIG1	Present	Present	Present	Present	Present
chr20	24591012	24591156	140487	intron	SYNDIG1	Present	Present	Present	Present	Present
chr20	30308655	30308896	-535	promoter-TSS	ABALON	Present	Present	Present	Present	Present
chr20	30400276	30400448	-6816	Intergenic	MYLK2	Present	Present	Present	Present	Present
chr20	31384693	31384912	17144	intron	DNMT3B	Present	Present	Present	Present	Present
chr20	35461734	35461821	26499	intron	SOGA1	Present	Present	Present	Present	Present
chr20	36140201	36140293	8458	Intergenic	BLCAP	Present	Present	Present	Present	Present
chr20	36145686	36146091	2817	TTS	BLCAP	Present	Present	Present	Present	Present
chr20	36152885	36153069	-122	promoter-TSS	BLCAP	Present	Present	Present	Present	Present
chr20	36153298	36153436	-512	promoter-TSS	BLCAP	Present	Present	Present	Present	Present
chr20	36193858	36194031	-37611	Intergenic	BLCAP	Present	Present	Present	Present	Present
chr20	36196131	36196501	-39983	Intergenic	BLCAP	Present	Present	Present	Present	Present
chr20	36255541	36255662	-4080	Intergenic	LINC00489	Present	Present	Present	Present	Present
chr20	36509113	36509547	-22199	Intergenic	VSTM2L	Present	Present	Present	Present	Present
chr20	36536487	36536686	5057	intron	VSTM2L	Present	Present	Present	Present	Present
chr20	36597473	36597709	64267	Intergenic	TTI1	Present	Present	Present	Present	Present
chr20	36615396	36615743	46289	intron	TTI1	Present	Present	Present	Present	Present
chr20	36621292	36621452	40486	intron	TTI1	Present	Present	Present	Present	Present
chr20	36754073	36754288	39492	Intergenic	TGM2	Present	Present	Present	Present	Present
chr20	36809281	36809993	-14727	Intergenic	TGM2	Present	Present	Present	Present	Present
chr20	36906635	36906862	-17611	intron	KIAA1755	Present	Present	Present	Present	Present
chr20	36915578	36915846	-16840	intron	BPI	Present	Present	Present	Present	Present
chr20	37278117	37278172	47692	intron	ARHGAP40	Present	Present	Present	Present	Present
chr20	37454621	37454869	20405	intron	PPP1R16B	Present	Present	Present	Present	Present
chr20	39633355	39633616	-23977	intron	TOP1	Present	Present	Present	Present	Present
chr20	40556002	40556107	-309038	Intergenic	CHD6	Present	Present	Present	Present	Present
chr20	40618810	40619223	-372000	Intergenic	CHD6	Present	Present	Present	Present	Present
chr20	42592913	42593233	18537	intron	TOX2	Present	Present	Present	Present	Present
chr20	42646695	42647118	72370	intron	TOX2	Present	Present	Present	Present	Present
chr20	42648581	42648899	74204	intron	TOX2	Present	Present	Present	Present	Present
chr20	42805889	42806035	9866	3'UTR	JPH2	Present	Present	Present	Present	Present
chr20	45425886	45426124	87717	Intergenic	SLC2A10	Present	Present	Present	Present	Present
chr20	45431643	45431741	-91571	Intergenic	EYA2	Present	Present	Present	Present	Present
chr20	45443385	45443781	-79680	Intergenic	EYA2	Present	Present	Present	Present	Present
chr20	45589178	45589332	65773	intron	EYA2	Present	Present	Present	Present	Present
chr20	45591577	45591679	68146	intron	EYA2	Present	Present	Present	Present	Present
chr20	45591873	45592078	68493	intron	EYA2	Present	Present	Present	Present	Present
chr20	45607733	45608072	84420	intron	EYA2	Present	Present	Present	Present	Present
chr20	45628392	45628758	105093	intron	EYA2	Present	Present	Present	Present	Present
chr20	45636962	45637115	113556	intron	EYA2	Present	Present	Present	Present	Present
chr20	45655953	45656386	132687	intron	EYA2	Present	Present	Present	Present	Present
chr20	45690295	45690791	-105066	intron	MIR3616	Present	Present	Present	Present	Present
chr20	45691015	45691156	-104524	intron	MIR3616	Present	Present	Present	Present	Present
chr20	45695598	45695755	-99933	intron	MIR3616	Present	Present	Present	Present	Present
chr20	45792773	45793135	-2655	intron	MIR3616	Present	Present	Present	Present	Present
chr20	45986494	45986586	-907	promoter-TSS	ZMYND8	Present	Present	Present	Present	Present
chr20	46475488	46475678	-60223	Intergenic	SULF2	Present	Present	Present	Present	Present
chr20	46537608	46537799	-74267	Intergenic	LINC01523	Present	Present	Present	Present	Present
chr20	46834642	46834874	-153896	Intergenic	LINC00494	Present	Present	Present	Present	Present
chr20	46904579	46904986	-83872	Intergenic	LINC00494	Present	Present	Present	Present	Present
chr20	46912458	46912768	-76041	Intergenic	LINC00494	Present	Present	Present	Present	Present
chr20	46915528	46915745	-73018	Intergenic	LINC00494	Present	Present	Present	Present	Present
chr20	46915897	46916199	-72606	Intergenic	LINC00494	Present	Present	Present	Present	Present
chr20	46927584	46928021	-60852	Intergenic	LINC00494	Present	Present	Present	Present	Present
chr20	46964331	46964477	-24250	Intergenic	LINC00494	Present	Present	Present	Present	Present
chr20	47010129	47010232	21526	Intergenic	LINC00494	Present	Present	Present	Present	Present
chr20	47084007	47084958	95828	Intergenic	LINC00494	Present	Present	Present	Present	Present
chr20	47107517	47107710	118959	Intergenic	LINC00494	Present	Present	Present	Present	Present
chr20	47114399	47114656	125873	Intergenic	LINC00494	Present	Present	Present	Present	Present
chr20	47117901	47118274	129433	Intergenic	LINC00494	Present	Present	Present	Present	Present
chr20	47299297	47299861	144957	intron	PREX1	Present	Present	Present	Present	Present
chr20	47413785	47414142	30573	intron	PREX1	Present	Present	Present	Present	Present
chr20	47470478	47470807	-26106	Intergenic	PREX1	Present	Present	Present	Present	Present
chr20	48196406	48196668	-11863	Intergenic	PTGIS	Present	Present	Present	Present	Present
chr20	48200165	48200546	-15681	Intergenic	PTGIS	Present	Present	Present	Present	Present
chr20	49951977	49952153	117449	Intergenic	MIR3194	Present	Present	Present	Present	Present
chr20	52515831	52516520	-23927	Intergenic	SUMO1P1	Present	Present	Present	Present	Present
chr20	55743508	55743725	-45136	TTS	BMP7-AS1	Present	Present	Present	Present	Present
chr20	56647005	56647246	68165	Intergenic	LINC01742	Present	Present	Present	Present	Present
chr20	56677447	56677646	-48412	Intergenic	C20orf85	Present	Present	Present	Present	Present
chr20	57205211	57205503	-4471	Intergenic	LINC01711	Present	Present	Present	Present	Present
chr20	57909824	57910177	34334	Intergenic	EDN3	Present	Present	Present	Present	Present
chr20	58586606	58586874	15311	intron	CDH26	Present	Present	Present	Present	Present
chr20	58971142	58971412	76757	Intergenic	LOC101928048	Present	Present	Present	Present	Present
chr20	59087653	59087917	34616	Intergenic	MIR4533	Present	Present	Present	Present	Present
chr20	59110291	59110501	-29224	Intergenic	MIR548AG2	Present	Present	Present	Present	Present
chr20	59133633	59133834	-5887	Intergenic	MIR548AG2	Present	Present	Present	Present	Present
chr20	59134475	59134847	-4959	Intergenic	MIR548AG2	Present	Present	Present	Present	Present
chr20	59846401	59846543	19155	intron	CDH4	Present	Present	Present	Present	Present
chr20	59960416	59961124	-113707	intron	CDH4	Present	Present	Present	Present	Present
chr20	60113348	60113572	38983	intron	CDH4	Present	Present	Present	Present	Present
chr20	61625456	61625647	12765	Intergenic	BHLHE23	Present	Present	Present	Present	Present
chr21	16375876	16376092	61337	intron	NRIP1	Present	Present	Present	Present	Present
chr21	16510863	16511147	-73684	Intergenic	NRIP1	Present	Present	Present	Present	Present
chr21	16512884	16513067	-75654	Intergenic	NRIP1	Present	Present	Present	Present	Present
chr21	18725521	18725558	-85669	Intergenic	LINC01549	Present	Present	Present	Present	Present
chr21	28092026	28092286	125572	Intergenic	ADAMTS1	Present	Present	Present	Present	Present
chr21	28105169	28105558	112365	Intergenic	ADAMTS1	Present	Present	Present	Present	Present
chr21	28134559	28134605	83146	Intergenic	ADAMTS1	Present	Present	Present	Present	Present
chr21	28168264	28168417	49388	Intergenic	ADAMTS1	Present	Present	Present	Present	Present
chr21	28171662	28171881	45957	Intergenic	ADAMTS1	Present	Present	Present	Present	Present
chr21	28183477	28183677	34151	Intergenic	ADAMTS1	Present	Present	Present	Present	Present
chr21	28229253	28229647	-11722	Intergenic	ADAMTS1	Present	Present	Present	Present	Present
chr21	28326967	28327245	826	TTS	MIR4759	Present	Present	Present	Present	Present
chr21	28942973	28943119	-151652	Intergenic	LINC00113	Present	Present	Present	Present	Present
chr21	33252249	33252546	7064	intron	HUNK	Present	Present	Present	Present	Present
chr21	33621599	33621793	29664	Intergenic	MIS18A	Present	Present	Present	Present	Present
chr21	34259416	34259639	-71669	Intergenic	LINC01690	Present	Present	Present	Present	Present
chr21	34305103	34305398	-25946	Intergenic	LINC01690	Present	Present	Present	Present	Present
chr21	34430859	34431114	851	intron	LINC00945	Present	Present	Present	Present	Present
chr21	34431352	34431600	1341	intron	LINC00945	Present	Present	Present	Present	Present
chr21	34681297	34681491	-15881	Intergenic	IFNAR1	Present	Present	Present	Present	Present
chr21	35392480	35392702	43908	Intergenic	LOC101928126	Present	Present	Present	Present	Present
chr21	36612147	36612576	-190766	Intergenic	RUNX1	Present	Present	Present	Present	Present
chr21	36628815	36629224	-207424	Intergenic	RUNX1	Present	Present	Present	Present	Present
chr21	37069701	37069866	-23230	Intergenic	MIR802	Present	Present	Present	Present	Present
chr21	37802430	37802538	36281	Intergenic	CLDN14	Present	Present	Present	Present	Present
chr21	38928051	38928233	135541	Intergenic	DYRK1A	Present	Present	Present	Present	Present
chr21	38928321	38928467	135793	Intergenic	DYRK1A	Present	Present	Present	Present	Present
chr21	41223087	41223556	-16043	Intergenic	PCP4	Present	Present	Present	Present	Present
chr21	43887288	43887578	28901	Intergenic	RSPH1	Present	Present	Present	Present	Present
chr21	44579582	44579691	-9482	Intergenic	CRYAA	Present	Present	Present	Present	Present
chr21	44936804	44937114	-37545	Intergenic	LINC01669	Present	Present	Present	Present	Present
chr21	45775442	45775522	1998	intron	TRPM2	Present	Present	Present	Present	Present
chr21	46193584	46193799	28044	intron	UBE2G2	Present	Present	Present	Present	Present
chr22	18056555	18056864	13511	intron	SLC25A18	Present	Present	Present	Present	Present
chr22	19502287	19502363	9608	exon	CLDN5	Present	Present	Present	Present	Present
chr22	23579523	23579866	-25260	intron	FBXW4P1	Present	Present	Present	Present	Present
chr22	24846656	24846867	18674	intron	ADORA2A	Present	Present	Present	Present	Present
chr22	25555056	25555320	-40637	intron	CRYBB3	Present	Present	Present	Present	Present
chr22	26141769	26141959	3709	intron	MYO18B	Present	Present	Present	Present	Present
chr22	27288580	27288839	-10546	Intergenic	LINC01422	Present	Present	Present	Present	Present
chr22	27773906	27774179	67430	Intergenic	LINC02554	Present	Present	Present	Present	Present
chr22	27816571	27816729	110038	Intergenic	LINC02554	Present	Present	Present	Present	Present
chr22	27843247	27843670	136846	Intergenic	LINC02554	Present	Present	Present	Present	Present
chr22	28035423	28035450	162308	Intergenic	MN1	Present	Present	Present	Present	Present
chr22	28035570	28035585	162167	Intergenic	MN1	Present	Present	Present	Present	Present
chr22	29451527	29451701	6293	3'UTR	C22orf31	Present	Present	Present	Present	Present
chr22	29475417	29475592	6481	intron	KREMEN1	Present	Present	Present	Present	Present
chr22	34143709	34143911	22838	non-coding	LARGE-AS1	Present	Present	Present	Present	Present
chr22	34367680	34368063	-48995	Intergenic	LARGE1	Present	Present	Present	Present	Present
chr22	35157175	35157322	236657	intron	ISX-AS1	Present	Present	Present	Present	Present
chr22	35194643	35194897	199135	intron	ISX-AS1	Present	Present	Present	Present	Present
chr22	35709478	35709929	13816	intron	TOM1	Present	Present	Present	Present	Present
chr22	36246455	36246628	-10030	intron	RBFOX2	Present	Present	Present	Present	Present
chr22	36740419	36740487	43659	intron	MYH9	Present	Present	Present	Present	Present
chr22	36828888	36829036	-44850	Intergenic	MYH9	Present	Present	Present	Present	Present
chr22	43659929	43660217	-11875	intron	LOC101927447	Present	Present	Present	Present	Present
chr22	43689594	43689867	17782	intron	LOC101927447	Present	Present	Present	Present	Present
chr22	48418047	48418211	-252047	Intergenic	MIR3201	Present	Present	Present	Present	Present
chr3	320073	320209	-41225	intron	CHL1	Present	Present	Present	Present	Present
chr3	2065730	2065973	-74636	Intergenic	CNTN4	Present	Present	Present	Present	Present
chr3	3731391	3731576	-109632	Intergenic	LRRN1	Present	Present	Present	Present	Present
chr3	3807428	3807779	-33512	intron	LRRN1	Present	Present	Present	Present	Present
chr3	4397343	4397558	52462	Intergenic	SETMAR	Present	Present	Present	Present	Present
chr3	4554797	4555087	19910	intron	ITPR1	Present	Present	Present	Present	Present
chr3	4849093	4849245	-55895	intron	EGOT	Present	Present	Present	Present	Present
chr3	5852720	5852999	-560919	Intergenic	MIR4790	Present	Present	Present	Present	Present
chr3	6368531	6368820	478461	Intergenic	GRM7-AS3	Present	Present	Present	Present	Present
chr3	6962802	6963024	-27209	intron	GRM7-AS2	Present	Present	Present	Present	Present
chr3	7672040	7672313	-95205	intron	GRM7-AS1	Present	Present	Present	Present	Present
chr3	7672684	7673078	-95910	intron	GRM7-AS1	Present	Present	Present	Present	Present
chr3	8524923	8525363	18201	intron	LMCD1-AS1	Present	Present	Present	Present	Present
chr3	8530785	8531149	12377	intron	LMCD1-AS1	Present	Present	Present	Present	Present
chr3	8532047	8532231	11205	intron	LMCD1-AS1	Present	Present	Present	Present	Present
chr3	8539440	8539597	3826	intron	LMCD1-AS1	Present	Present	Present	Present	Present
chr3	8540880	8541000	2404	intron	LMCD1-AS1	Present	Present	Present	Present	Present
chr3	8548670	8548858	5255	intron	LMCD1	Present	Present	Present	Present	Present
chr3	8631711	8631972	18373	Intergenic	LINC00312	Present	Present	Present	Present	Present
chr3	8635172	8635478	21857	Intergenic	LINC00312	Present	Present	Present	Present	Present
chr3	8638322	8638678	25032	Intergenic	LINC00312	Present	Present	Present	Present	Present
chr3	8649340	8649342	35873	Intergenic	LINC00312	Present	Present	Present	Present	Present
chr3	8751686	8751836	-23725	Intergenic	CAV3	Present	Present	Present	Present	Present
chr3	8754281	8754882	-20905	Intergenic	CAV3	Present	Present	Present	Present	Present
chr3	8783392	8783538	7977	intron	CAV3	Present	Present	Present	Present	Present
chr3	8799885	8800123	10413	intron	OXTR	Present	Present	Present	Present	Present
chr3	9444623	9444775	5315	intron	SETD5	Present	Present	Present	Present	Present
chr3	10997919	10998292	-36315	Intergenic	SLC6A1	Present	Present	Present	Present	Present
chr3	10998728	10998889	-35612	Intergenic	SLC6A1	Present	Present	Present	Present	Present
chr3	11000139	11000404	-34149	Intergenic	SLC6A1	Present	Present	Present	Present	Present
chr3	11010203	11010447	-24095	Intergenic	SLC6A1	Present	Present	Present	Present	Present
chr3	11413250	11413582	99333	intron	ATG7	Present	Present	Present	Present	Present
chr3	11623443	11623605	306	intron	VGLL4	Present	Present	Present	Present	Present
chr3	11623792	11623941	-36	promoter-TSS	VGLL4	Present	Present	Present	Present	Present
chr3	11632796	11633237	-9186	intron	VGLL4	Present	Present	Present	Present	Present
chr3	11651523	11651702	-5557	intron	VGLL4	Present	Present	Present	Present	Present
chr3	12033373	12033560	-12368	Intergenic	SYN2	Present	Present	Present	Present	Present
chr3	12036559	12036938	-9086	Intergenic	SYN2	Present	Present	Present	Present	Present
chr3	12484765	12484897	-41100	Intergenic	TSEN2	Present	Present	Present	Present	Present
chr3	13012269	13012404	-3106	intron	IQSEC1	Present	Present	Present	Present	Present
chr3	13505257	13505625	16112	Intergenic	HDAC11-AS1	Present	Present	Present	Present	Present
chr3	13506901	13507185	14510	Intergenic	HDAC11-AS1	Present	Present	Present	Present	Present
chr3	14413436	14413685	-19492	Intergenic	LINC01267	Present	Present	Present	Present	Present
chr3	15676898	15677048	33497	exon	BTD	Present	Present	Present	Present	Present
chr3	23061457	23061817	182432	Intergenic	UBE2E2-AS1	Present	Present	Present	Present	Present
chr3	23641563	23641931	-205699	Intergenic	UBE2E1	Present	Present	Present	Present	Present
chr3	23727375	23727566	-119976	Intergenic	UBE2E1	Present	Present	Present	Present	Present
chr3	27067345	27067531	190576	Intergenic	NEK10	Present	Present	Present	Present	Present
chr3	29140966	29141452	181221	Intergenic	RBMS3-AS3	Present	Present	Present	Present	Present
chr3	30230321	30230485	-254756	Intergenic	RBMS3-AS1	Present	Present	Present	Present	Present
chr3	35435449	35435667	-43	promoter-TSS	LOC101928135	Present	Present	Present	Present	Present
chr3	35706152	35706365	-14858	intron	ARPP21	Present	Present	Present	Present	Present
chr3	40889253	40889427	322889	Intergenic	ZNF621	Present	Present	Present	Present	Present
chr3	52869125	52869389	-222	promoter-TSS	MUSTN1	Present	Present	Present	Present	Present
chr3	54925665	54925978	9461	intron	CACNA2D3-AS1	Present	Present	Present	Present	Present
chr3	55034170	55034187	-33049	intron	LRTM1	Present	Present	Present	Present	Present
chr3	57082558	57082842	-11992	intron	SPATA12	Present	Present	Present	Present	Present
chr3	57162230	57162446	37043	intron	IL17RD	Present	Present	Present	Present	Present
chr3	58567342	58567716	-4411	intron	FAM107A	Present	Present	Present	Present	Present
chr3	59807084	59807347	-162992	intron	LOC339902	Present	Present	Present	Present	Present
chr3	60729686	60729836	-126158	intron	MIR548BB	Present	Present	Present	Present	Present
chr3	61715814	61716007	168665	intron	PTPRG	Present	Present	Present	Present	Present
chr3	61880671	61881012	333596	intron	PTPRG	Present	Present	Present	Present	Present
chr3	62672694	62672889	188300	intron	CADPS	Present	Present	Present	Present	Present
chr3	64068504	64068973	4301	intron	LINC00994	Present	Present	Present	Present	Present
chr3	64095159	64095466	6166	intron	PRICKLE2-AS2	Present	Present	Present	Present	Present
chr3	65554233	65554430	-325160	intron	MAGI1-AS1	Present	Present	Present	Present	Present
chr3	65857061	65857337	-22292	intron	MAGI1-AS1	Present	Present	Present	Present	Present
chr3	65900173	65900326	20758	intron	MAGI1-AS1	Present	Present	Present	Present	Present
chr3	66101646	66101788	-17568	Intergenic	SLC25A26	Present	Present	Present	Present	Present
chr3	66437408	66437811	113236	intron	LRIG1	Present	Present	Present	Present	Present
chr3	66449049	66449483	101579	intron	LRIG1	Present	Present	Present	Present	Present
chr3	66604019	66604087	-53208	Intergenic	LRIG1	Present	Present	Present	Present	Present
chr3	66656742	66656904	-105978	Intergenic	LRIG1	Present	Present	Present	Present	Present
chr3	66743867	66744164	44745	Intergenic	LOC105377143	Present	Present	Present	Present	Present
chr3	67512181	67512347	192774	intron	SUCLG2	Present	Present	Present	Present	Present
chr3	71218316	71218451	-37035	intron	FOXP1	Present	Present	Present	Present	Present
chr3	72956944	72957300	19925	intron	GXYLT2	Present	Present	Present	Present	Present
chr3	73320104	73320266	162961	Intergenic	PDZRN3	Present	Present	Present	Present	Present
chr3	73476320	73476576	6698	intron	PDZRN3	Present	Present	Present	Present	Present
chr3	73476668	73476896	6364	intron	PDZRN3	Present	Present	Present	Present	Present
chr3	73487161	73487355	-4112	intron	PDZRN3	Present	Present	Present	Present	Present
chr3	73734264	73734489	-60284	Intergenic	PDZRN3	Present	Present	Present	Present	Present
chr3	79668073	79668426	111212	intron	MIR3923	Present	Present	Present	Present	Present
chr3	85014358	85014517	6297	intron	CADM2	Present	Present	Present	Present	Present
chr3	85036952	85037211	28941	intron	CADM2	Present	Present	Present	Present	Present
chr3	86918740	86918944	121457	Intergenic	VGLL3	Present	Present	Present	Present	Present
chr3	86972298	86972635	67833	Intergenic	VGLL3	Present	Present	Present	Present	Present
chr3	87119262	87119422	-19088	Intergenic	LINC00506	Present	Present	Present	Present	Present
chr3	87222320	87222479	53028	Intergenic	MIR4795	Present	Present	Present	Present	Present
chr3	87370026	87370534	-44546	Intergenic	POU1F1	Present	Present	Present	Present	Present
chr3	87440087	87440242	-114430	Intergenic	POU1F1	Present	Present	Present	Present	Present
chr3	104628195	104628335	-457292	Intergenic	ALCAM	Present	Present	Present	Present	Present
chr3	106533228	106533408	426167	Intergenic	LINC00882	Present	Present	Present	Present	Present
chr3	106917783	106917980	41604	intron	LINC00882	Present	Present	Present	Present	Present
chr3	111051648	111051819	-209311	Intergenic	CD96	Present	Present	Present	Present	Present
chr3	111634911	111635086	56324	intron	PHLDB2	Present	Present	Present	Present	Present
chr3	111643234	111643481	-54516	intron	ABHD10	Present	Present	Present	Present	Present
chr3	112505168	112505338	-16072	Intergenic	CD200R1L-AS1	Present	Present	Present	Present	Present
chr3	127469269	127469450	72366	intron	MGLL	Present	Present	Present	Present	Present
chr3	127470296	127470473	71341	intron	MGLL	Present	Present	Present	Present	Present
chr3	135663668	135663926	-20773	Intergenic	PPP2R3A	Present	Present	Present	Present	Present
chr3	135996601	135996809	27523	intron	PCCB	Present	Present	Present	Present	Present
chr3	136502544	136502734	-31419	Intergenic	STAG1	Present	Present	Present	Present	Present
chr3	136503702	136503867	-32564	Intergenic	STAG1	Present	Present	Present	Present	Present
chr3	136921903	136922041	245147	Intergenic	IL20RB	Present	Present	Present	Present	Present
chr3	136923327	136923510	246593	Intergenic	IL20RB	Present	Present	Present	Present	Present
chr3	136982950	136983571	306435	Intergenic	IL20RB	Present	Present	Present	Present	Present
chr3	137012915	137013316	336290	Intergenic	IL20RB	Present	Present	Present	Present	Present
chr3	137228426	137228889	-254500	Intergenic	SOX14	Present	Present	Present	Present	Present
chr3	138057680	138058016	-8642	Intergenic	MRAS	Present	Present	Present	Present	Present
chr3	138137449	138137602	-15890	Intergenic	ESYT3	Present	Present	Present	Present	Present
chr3	138183030	138183263	29688	intron	ESYT3	Present	Present	Present	Present	Present
chr3	140803152	140803420	33097	intron	SPSB4	Present	Present	Present	Present	Present
chr3	140812352	140812734	42354	intron	SPSB4	Present	Present	Present	Present	Present
chr3	140814051	140814324	43998	intron	SPSB4	Present	Present	Present	Present	Present
chr3	148509192	148509338	-36333	Intergenic	CPB1	Present	Present	Present	Present	Present
chr3	149299584	149299840	76100	intron	WWTR1	Present	Present	Present	Present	Present
chr3	149779273	149779434	-34877	Intergenic	LOC105374313	Present	Present	Present	Present	Present
chr3	149793293	149793423	-20872	Intergenic	LOC105374313	Present	Present	Present	Present	Present
chr3	149796789	149797170	-17251	Intergenic	LOC105374313	Present	Present	Present	Present	Present
chr3	149824791	149825122	10726	intron	LOC105374313	Present	Present	Present	Present	Present
chr3	149865001	149865290	50915	intron	LOC105374313	Present	Present	Present	Present	Present
chr3	149901934	149902098	-54290	Intergenic	LINC01213	Present	Present	Present	Present	Present
chr3	149934068	149934548	-21998	Intergenic	LINC01213	Present	Present	Present	Present	Present
chr3	149945737	149945886	-10495	Intergenic	LINC01213	Present	Present	Present	Present	Present
chr3	149960451	149960696	4086	Intergenic	LINC01213	Present	Present	Present	Present	Present
chr3	149965238	149965644	8954	Intergenic	LINC01213	Present	Present	Present	Present	Present
chr3	149996878	149997035	40469	intron	LINC01213	Present	Present	Present	Present	Present
chr3	150026277	150026712	15040	intron	LINC01214	Present	Present	Present	Present	Present
chr3	156135119	156135272	29530	intron	KCNAB1-AS1	Present	Present	Present	Present	Present
chr3	156253210	156253375	18622	intron	SSR3	Present	Present	Present	Present	Present
chr3	159616033	159616189	58461	TTS	SCHIP1	Present	Present	Present	Present	Present
chr3	160587742	160587945	-543	promoter-TSS	PPM1L	Present	Present	Present	Present	Present
chr3	160603535	160603745	15254	intron	PPM1L	Present	Present	Present	Present	Present
chr3	162316321	162316574	704642	Intergenic	LINC01192	Present	Present	Present	Present	Present
chr3	171266846	171266998	-88725	Intergenic	TNIK	Present	Present	Present	Present	Present
chr3	174048216	174048378	-409711	Intergenic	NLGN1-AS1	Present	Present	Present	Present	Present
chr3	177058384	177058520	46222	Intergenic	LINC00501	Present	Present	Present	Present	Present
chr3	177188017	177188300	28449	intron	LINC00578	Present	Present	Present	Present	Present
chr3	177652988	177653162	118422	Intergenic	LINC02015	Present	Present	Present	Present	Present
chr3	178038255	178038586	-98569	Intergenic	LINC01014	Present	Present	Present	Present	Present
chr3	182286121	182286302	-61299	Intergenic	LINC01995	Present	Present	Present	Present	Present
chr3	183016708	183016910	45768	intron	B3GNT5	Present	Present	Present	Present	Present
chr3	183302056	183302066	-28567	Intergenic	KLHL6	Present	Present	Present	Present	Present
chr3	184214780	184214915	59859	Intergenic	LINC01840	Present	Present	Present	Present	Present
chr3	184391266	184391384	38527	Intergenic	MAGEF1	Present	Present	Present	Present	Present
chr3	184391466	184391553	38343	Intergenic	MAGEF1	Present	Present	Present	Present	Present
chr3	184893491	184893696	12904	intron	EHHADH-AS1	Present	Present	Present	Present	Present
chr3	185697645	185697832	20006	non-coding	NMRAL2P	Present	Present	Present	Present	Present
chr3	185743026	185743291	65426	Intergenic	NMRAL2P	Present	Present	Present	Present	Present
chr3	185762944	185763008	63902	Intergenic	ETV5	Present	Present	Present	Present	Present
chr3	185815768	185815914	11037	intron	ETV5	Present	Present	Present	Present	Present
chr3	185936986	185937193	-110211	intron	ETV5	Present	Present	Present	Present	Present
chr3	186694901	186695359	-44513	intron	ST6GAL1	Present	Present	Present	Present	Present
chr3	188452300	188452632	45897	intron	MIR28	Present	Present	Present	Present	Present
chr3	188980541	188980711	-22243	intron	TPRG1-AS2	Present	Present	Present	Present	Present
chr3	189056309	189056445	-97994	Intergenic	TPRG1-AS2	Present	Present	Present	Present	Present
chr3	189073289	189073511	-115017	Intergenic	TPRG1-AS2	Present	Present	Present	Present	Present
chr3	189176362	189176535	-138087	Intergenic	TP63	Present	Present	Present	Present	Present
chr3	192569726	192569917	65824	intron	MB21D2	Present	Present	Present	Present	Present
chr3	192622654	192622966	12835	intron	MB21D2	Present	Present	Present	Present	Present
chr3	193109830	193110040	-13393	Intergenic	ATP13A5	Present	Present	Present	Present	Present
chr3	193534804	193535104	26844	Intergenic	LINC02038	Present	Present	Present	Present	Present
chr3	196393046	196393251	26583	Intergenic	NRROS	Present	Present	Present	Present	Present
chr4	237332	237513	31033	intron	ZNF876P	Present	Present	Present	Present	Present
chr4	8040499	8040720	33106	intron	ABLIM2	Present	Present	Present	Present	Present
chr4	8393776	8394078	48523	intron	ACOX3	Present	Present	Present	Present	Present
chr4	8395589	8395706	46803	intron	ACOX3	Present	Present	Present	Present	Present
chr4	8395863	8396455	46291	intron	ACOX3	Present	Present	Present	Present	Present
chr4	9871937	9872094	88757	intron	DRD5	Present	Present	Present	Present	Present
chr4	10203123	10203269	-84773	Intergenic	WDR1	Present	Present	Present	Present	Present
chr4	10241903	10241938	-123497	Intergenic	WDR1	Present	Present	Present	Present	Present
chr4	10242084	10242382	-123810	Intergenic	WDR1	Present	Present	Present	Present	Present
chr4	24435927	24436318	38406	intron	PPARGC1A	Present	Present	Present	Present	Present
chr4	25101021	25101330	60896	Intergenic	SEPSECS	Present	Present	Present	Present	Present
chr4	25502399	25502883	68327	Intergenic	LOC101929161	Present	Present	Present	Present	Present
chr4	25788156	25788676	76194	intron	SEL1L3	Present	Present	Present	Present	Present
chr4	26173570	26173972	-147561	Intergenic	RBPJ	Present	Present	Present	Present	Present
chr4	26805093	26805342	56649	Intergenic	STIM2-AS1	Present	Present	Present	Present	Present
chr4	29710273	29710436	494440	Intergenic	LINC02472	Present	Present	Present	Present	Present
chr4	30497003	30497185	-224897	Intergenic	PCDH7	Present	Present	Present	Present	Present
chr4	30499319	30499466	-222599	Intergenic	PCDH7	Present	Present	Present	Present	Present
chr4	30804365	30804614	82498	intron	PCDH7	Present	Present	Present	Present	Present
chr4	31615714	31615969	107675	Intergenic	LINC02501	Present	Present	Present	Present	Present
chr4	38111686	38111844	-37	promoter-TSS	TBC1D1	Present	Present	Present	Present	Present
chr4	38130648	38131032	9265	intron	TBC1D1	Present	Present	Present	Present	Present
chr4	38192586	38192755	71095	Intergenic	TBC1D1	Present	Present	Present	Present	Present
chr4	38576346	38576519	10808	TTS	LINC02278	Present	Present	Present	Present	Present
chr4	41511453	41511665	-28615	intron	LIMCH1	Present	Present	Present	Present	Present
chr4	54467664	54467846	8632	intron	LNX1-AS2	Present	Present	Present	Present	Present
chr4	55650513	55650606	126464	Intergenic	KIT	Present	Present	Present	Present	Present
chr4	56083500	56083711	-91843	Intergenic	KDR	Present	Present	Present	Present	Present
chr4	60045995	60046274	166843	Intergenic	LINC02429	Present	Present	Present	Present	Present
chr4	60419146	60419312	539938	Intergenic	LINC02429	Present	Present	Present	Present	Present
chr4	74316315	74316608	14523	exon	AFP	Present	Present	Present	Present	Present
chr4	75930369	75930517	-34871	intron	LOC100507388	Present	Present	Present	Present	Present
chr4	76180568	76180734	-98635	Intergenic	LINC02483	Present	Present	Present	Present	Present
chr4	76285645	76285811	6442	intron	LINC02483	Present	Present	Present	Present	Present
chr4	77122150	77122296	12754	intron	SCARB2	Present	Present	Present	Present	Present
chr4	77511469	77511635	14848	intron	MIR548AH	Present	Present	Present	Present	Present
chr4	78098408	78098631	20159	Intergenic	CCNG2	Present	Present	Present	Present	Present
chr4	78621161	78621333	118971	Intergenic	CNOT6L	Present	Present	Present	Present	Present
chr4	84377067	84377327	-14	promoter-TSS	MRPS18C	Present	Present	Present	Present	Present
chr4	109281202	109281348	187999	Intergenic	LEF1-AS1	Present	Present	Present	Present	Present
chr4	111759197	111759517	22446	Intergenic	MIR297	Present	Present	Present	Present	Present
chr4	112320762	112320929	-539042	Intergenic	MIR297	Present	Present	Present	Present	Present
chr4	124752160	124752298	56810	intron	LINC01091	Present	Present	Present	Present	Present
chr4	124753730	124754071	58481	intron	LINC01091	Present	Present	Present	Present	Present
chr4	125857650	125857827	-223851	Intergenic	ANKRD50	Present	Present	Present	Present	Present
chr4	129505521	129505646	156412	Intergenic	LINC02615	Present	Present	Present	Present	Present
chr4	143861842	143862013	-94239	Intergenic	INPP4B	Present	Present	Present	Present	Present
chr4	153877844	153878004	13789	intron	FHDC1	Present	Present	Present	Present	Present
chr4	190590051	190590206	-8841	Intergenic	LOC105379514	Present	Present	Present	Present	Present
chr5	3489515	3489821	14450	intron	LINC01017	Present	Present	Present	Present	Present
chr5	14036026	14036237	-91542	Intergenic	DNAH5	Present	Present	Present	Present	Present
chr5	36158475	36158616	6332	intron	SKP2	Present	Present	Present	Present	Present
chr5	52136120	52136327	52473	intron	ITGA1	Present	Present	Present	Present	Present
chr5	52549443	52549556	143827	Intergenic	LOC257396	Present	Present	Present	Present	Present
chr5	54179287	54179462	102047	Intergenic	ESM1	Present	Present	Present	Present	Present
chr5	54897130	54897419	-66368	Intergenic	PLPP1	Present	Present	Present	Present	Present
chr5	56989010	56989172	42604	Intergenic	LOC101928505	Present	Present	Present	Present	Present
chr5	57131120	57131283	63788	Intergenic	LINC02225	Present	Present	Present	Present	Present
chr5	57154828	57155071	40040	Intergenic	LINC02225	Present	Present	Present	Present	Present
chr5	58423519	58423750	-88331	intron	PDE4D	Present	Present	Present	Present	Present
chr5	58612847	58613126	39810	intron	PDE4D	Present	Present	Present	Present	Present
chr5	58858879	58859083	23343	intron	PDE4D	Present	Present	Present	Present	Present
chr5	59064345	59064721	141	5'UTR	PDE4D	Present	Present	Present	Present	Present
chr5	60597687	60597730	-30377	Intergenic	ZSWIM6	Present	Present	Present	Present	Present
chr5	66563709	66563885	-71170	Intergenic	CD180	Present	Present	Present	Present	Present
chr5	66633718	66633843	-141153	Intergenic	CD180	Present	Present	Present	Present	Present
chr5	71673767	71674037	57702	Intergenic	PTCD2	Present	Present	Present	Present	Present
chr5	71748440	71748748	54643	intron	ZNF366	Present	Present	Present	Present	Present
chr5	73213388	73213572	104109	intron	ARHGEF28	Present	Present	Present	Present	Present
chr5	73264689	73264866	155406	Intergenic	ARHGEF28	Present	Present	Present	Present	Present
chr5	73335949	73336188	226697	Intergenic	ARHGEF28	Present	Present	Present	Present	Present
chr5	73403837	73404083	200190	Intergenic	LINC01335	Present	Present	Present	Present	Present
chr5	73839494	73839658	-6775	Intergenic	LINC01331	Present	Present	Present	Present	Present
chr5	73921073	73921201	-14711	Intergenic	HEXB	Present	Present	Present	Present	Present
chr5	73925318	73925497	-10441	non-coding	HEXB	Present	Present	Present	Present	Present
chr5	77289749	77290197	35902	Intergenic	LOC101929154	Present	Present	Present	Present	Present
chr5	78105578	78105596	-160992	intron	LHFPL2	Present	Present	Present	Present	Present
chr5	78204164	78204322	76890	intron	ARSB	Present	Present	Present	Present	Present
chr5	79424085	79424223	-44666	intron	CTD-2201I18.1	Present	Present	Present	Present	Present
chr5	79500778	79500941	51008	intron	SERINC5	Present	Present	Present	Present	Present
chr5	79919948	79920210	-1736	Intergenic	LINC01337	Present	Present	Present	Present	Present
chr5	80050841	80050994	-100115	intron	DHFR	Present	Present	Present	Present	Present
chr5	106906817	106907039	99710	intron	EFNA5	Present	Present	Present	Present	Present
chr5	112531520	112531804	98973	intron	MCC	Present	Present	Present	Present	Present
chr5	115776128	115776416	-6922	Intergenic	SEMA6A-AS1	Present	Present	Present	Present	Present
chr5	115777001	115777178	-6105	Intergenic	SEMA6A-AS1	Present	Present	Present	Present	Present
chr5	115988123	115988276	-77680	Intergenic	SEMA6A	Present	Present	Present	Present	Present
chr5	118028676	118028816	96863	Intergenic	LINC02215	Present	Present	Present	Present	Present
chr5	126334130	126334263	32054	intron	DEC1	Present	Present	Present	Present	Present
chr5	126523408	126523708	-102898	Intergenic	MEGF10	Present	Present	Present	Present	Present
chr5	126752746	126752916	-100501	intron	PRRC1	Present	Present	Present	Present	Present
chr5	126760866	126761029	-92385	TTS	PRRC1	Present	Present	Present	Present	Present
chr5	131541543	131541711	11984	intron	MIR6830	Present	Present	Present	Present	Present
chr5	141870895	141871137	129883	Intergenic	FGF1	Present	Present	Present	Present	Present
chr5	142421106	142421263	-150881	intron	ARHGAP26-IT1	Present	Present	Present	Present	Present
chr5	142511700	142511849	-60291	intron	ARHGAP26-IT1	Present	Present	Present	Present	Present
chr5	147052889	147053180	109257	intron	JAKMIP2	Present	Present	Present	Present	Present
chr5	148381736	148381921	60144	3'UTR	MIR584	Present	Present	Present	Present	Present
chr5	157038626	157039062	-36061	Intergenic	ADAM19	Present	Present	Present	Present	Present
chr5	157039322	157039458	-36607	Intergenic	ADAM19	Present	Present	Present	Present	Present
chr5	158287884	158288001	237022	intron	EBF1	Present	Present	Present	Present	Present
chr5	169835297	169835486	18894	intron	CTD-2270F17.1	Present	Present	Present	Present	Present
chr5	170757110	170757275	20940	Intergenic	TLX3	Present	Present	Present	Present	Present
chr5	171782063	171782278	69569	intron	LOC100288254	Present	Present	Present	Present	Present
chr5	172683958	172684023	-21781	Intergenic	NKX2-5	Present	Present	Present	Present	Present
chr5	172728655	172729021	-1895	Intergenic	MIR12118	Present	Present	Present	Present	Present
chr5	172729454	172729671	-1171	Intergenic	MIR12118	Present	Present	Present	Present	Present
chr5	172751121	172751358	5267	intron	STC2	Present	Present	Present	Present	Present
chr5	172882213	172882476	107886	Intergenic	MIR8056	Present	Present	Present	Present	Present
chr5	172883775	172884290	109574	Intergenic	MIR8056	Present	Present	Present	Present	Present
chr5	172886183	172886496	111881	Intergenic	MIR8056	Present	Present	Present	Present	Present
chr5	172923105	172923511	-83329	Intergenic	LOC285593	Present	Present	Present	Present	Present
chr5	172925907	172926630	-80369	Intergenic	LOC285593	Present	Present	Present	Present	Present
chr5	173008719	173008931	2188	TTS	LOC285593	Present	Present	Present	Present	Present
chr5	173009362	173009471	2779	TTS	LOC285593	Present	Present	Present	Present	Present
chr5	173072496	173072731	-28947	Intergenic	BOD1	Present	Present	Present	Present	Present
chr5	173172311	173172384	865	intron	LINC01484	Present	Present	Present	Present	Present
chr5	173180506	173180671	-7376	Intergenic	LINC01484	Present	Present	Present	Present	Present
chr5	173850579	173850794	87329	intron	LINC01411	Present	Present	Present	Present	Present
chr5	173852767	173852839	89446	intron	LINC01411	Present	Present	Present	Present	Present
chr5	173863736	173864004	100513	intron	LINC01411	Present	Present	Present	Present	Present
chr5	173959585	173959824	-191881	Intergenic	MSX2	Present	Present	Present	Present	Present
chr5	173960159	173960375	-191318	Intergenic	MSX2	Present	Present	Present	Present	Present
chr5	173998783	173999002	-152693	Intergenic	MSX2	Present	Present	Present	Present	Present
chr5	174448844	174449054	-26215	Intergenic	LINC01951	Present	Present	Present	Present	Present
chr5	174662274	174662613	208742	Intergenic	DRD1	Present	Present	Present	Present	Present
chr5	174662781	174662956	208317	Intergenic	DRD1	Present	Present	Present	Present	Present
chr5	174810417	174810596	60679	Intergenic	DRD1	Present	Present	Present	Present	Present
chr5	176532583	176532752	16116	Intergenic	FGFR4	Present	Present	Present	Present	Present
chr5	176533006	176533187	16545	Intergenic	FGFR4	Present	Present	Present	Present	Present
chr5	176972667	176972840	8343	intron	FAM193B	Present	Present	Present	Present	Present
chr5	176973594	176973752	7423	intron	FAM193B	Present	Present	Present	Present	Present
chr5	177495331	177495706	-45015	Intergenic	N4BP3	Present	Present	Present	Present	Present
chr5	177542351	177542498	1891	intron	N4BP3	Present	Present	Present	Present	Present
chr5	177823928	177824076	-164179	intron	PHYKPL	Present	Present	Present	Present	Present
chr6	4352390	4352700	-136487	Intergenic	LINC02533	Present	Present	Present	Present	Present
chr6	4397546	4397885	-91317	Intergenic	LINC02533	Present	Present	Present	Present	Present
chr6	4506596	4506758	17645	Intergenic	LINC02533	Present	Present	Present	Present	Present
chr6	33955571	33955730	12178	Intergenic	MIR1275	Present	Present	Present	Present	Present
chr6	33957925	33958082	9825	Intergenic	MIR1275	Present	Present	Present	Present	Present
chr6	34697841	34698071	-26915	Intergenic	SNRPC	Present	Present	Present	Present	Present
chr6	35074011	35074297	34962	Intergenic	TCP11	Present	Present	Present	Present	Present
chr6	37105456	37105805	-32298	Intergenic	PIM1	Present	Present	Present	Present	Present
chr6	38183424	38183792	-265764	intron	BTBD9-AS1	Present	Present	Present	Present	Present
chr6	38184426	38184594	-264862	intron	BTBD9-AS1	Present	Present	Present	Present	Present
chr6	40904676	40904823	86270	intron	LOC101929555	Present	Present	Present	Present	Present
chr6	41977953	41978091	38610	intron	CCND3	Present	Present	Present	Present	Present
chr6	41978244	41978506	38257	intron	CCND3	Present	Present	Present	Present	Present
chr6	41996313	41996505	20223	intron	CCND3	Present	Present	Present	Present	Present
chr6	41998444	41998870	17975	intron	CCND3	Present	Present	Present	Present	Present
chr6	42858617	42858823	-161	promoter-TSS	C6orf226	Present	Present	Present	Present	Present
chr6	42867810	42867911	-9301	Intergenic	C6orf226	Present	Present	Present	Present	Present
chr6	43443300	43443586	-1818	Intergenic	TJAP1	Present	Present	Present	Present	Present
chr6	43460185	43460314	2753	intron	TJAP1	Present	Present	Present	Present	Present
chr6	43663235	43663382	-7759	Intergenic	MRPS18A	Present	Present	Present	Present	Present
chr6	43775181	43775380	35575	Intergenic	VEGFA	Present	Present	Present	Present	Present
chr6	43775575	43775774	35969	Intergenic	VEGFA	Present	Present	Present	Present	Present
chr6	44168420	44168686	-16110	Intergenic	MYMX	Present	Present	Present	Present	Present
chr6	44214690	44214886	-50	promoter-TSS	HSP90AB1	Present	Present	Present	Present	Present
chr6	44628213	44628606	-108791	Intergenic	LOC105375075	Present	Present	Present	Present	Present
chr6	44630605	44630950	-111159	Intergenic	LOC105375075	Present	Present	Present	Present	Present
chr6	44649660	44649834	-130129	Intergenic	LOC105375075	Present	Present	Present	Present	Present
chr6	44665110	44665521	-145697	Intergenic	LOC105375075	Present	Present	Present	Present	Present
chr6	44680170	44680468	-160701	Intergenic	LOC105375075	Present	Present	Present	Present	Present
chr6	44680589	44680842	-161097	Intergenic	LOC105375075	Present	Present	Present	Present	Present
chr6	45413623	45413954	23776	intron	RUNX2	Present	Present	Present	Present	Present
chr6	51138478	51138668	-348095	Intergenic	LOC101927082	Present	Present	Present	Present	Present
chr6	51378778	51378918	-107820	Intergenic	LOC101927082	Present	Present	Present	Present	Present
chr6	51973078	51973224	-20740	Intergenic	PKHD1	Present	Present	Present	Present	Present
chr6	52416244	52416538	25467	intron	TRAM2	Present	Present	Present	Present	Present
chr6	52416768	52416831	25059	intron	TRAM2	Present	Present	Present	Present	Present
chr6	54479643	54479789	-231853	Intergenic	FAM83B	Present	Present	Present	Present	Present
chr6	55734603	55734838	5668	intron	BMP5	Present	Present	Present	Present	Present
chr6	70294999	70295181	211268	Intergenic	LMBRD1	Present	Present	Present	Present	Present
chr6	70624044	70624202	47675	intron	COL19A1	Present	Present	Present	Present	Present
chr6	70862813	70862963	130012	intron	COL9A1	Present	Present	Present	Present	Present
chr6	89128751	89129038	120194	Intergenic	LOC101928936	Present	Present	Present	Present	Present
chr6	89913925	89914136	13466	intron	GABRR1	Present	Present	Present	Present	Present
chr6	90695213	90695349	91093	intron	GJA10	Present	Present	Present	Present	Present
chr6	90709024	90709171	104909	intron	GJA10	Present	Present	Present	Present	Present
chr6	90928325	90928550	78125	intron	BACH2	Present	Present	Present	Present	Present
chr6	91113522	91114006	91303	Intergenic	MIR4464	Present	Present	Present	Present	Present
chr6	92753593	92753762	-353531	Intergenic	CASC6	Present	Present	Present	Present	Present
chr6	100586632	100586793	-144598	Intergenic	MCHR2	Present	Present	Present	Present	Present
chr6	105612417	105612563	11640	intron	POPDC3	Present	Present	Present	Present	Present
chr6	107987682	107987873	65577	Intergenic	SCML4	Present	Present	Present	Present	Present
chr6	111873534	111873693	14869	intron	TRAF3IP2	Present	Present	Present	Present	Present
chr6	114053657	114054063	-82583	Intergenic	LINC02541	Present	Present	Present	Present	Present
chr6	133753228	133753561	190757	intron	EYA4	Present	Present	Present	Present	Present
chr6	133824053	133824243	261511	intron	EYA4	Present	Present	Present	Present	Present
chr6	133870608	133870867	-271548	intron	LINC01312	Present	Present	Present	Present	Present
chr6	139909254	139909460	-113624	Intergenic	LINC01625	Present	Present	Present	Present	Present
chr6	140085800	140085953	-6334	Intergenic	FILNC1	Present	Present	Present	Present	Present
chr6	143175929	143176080	90309	intron	HIVEP2	Present	Present	Present	Present	Present
chr6	144294247	144294578	-7797	intron	PLAGL1	Present	Present	Present	Present	Present
chr6	144511853	144512041	40293	3'UTR	STX11	Present	Present	Present	Present	Present
chr6	144587329	144587578	-25420	Intergenic	UTRN	Present	Present	Present	Present	Present
chr6	147235148	147235308	-110268	intron	KATNBL1P6	Present	Present	Present	Present	Present
chr6	148762332	148762483	-67228	intron	SASH1	Present	Present	Present	Present	Present
chr6	149280673	149280819	5074	intron	UST-AS1	Present	Present	Present	Present	Present
chr6	149290828	149291121	-5154	intron	UST-AS1	Present	Present	Present	Present	Present
chr6	152421207	152421509	-48404	3'UTR	MIR3163	Present	Present	Present	Present	Present
chr6	158135135	158135343	-109039	Intergenic	SNX9	Present	Present	Present	Present	Present
chr6	158135508	158135652	-108698	Intergenic	SNX9	Present	Present	Present	Present	Present
chr6	158146467	158146731	-97679	Intergenic	SNX9	Present	Present	Present	Present	Present
chr6	158439339	158439460	1274	intron	SYNJ2	Present	Present	Present	Present	Present
chr6	158440241	158440391	2191	intron	SYNJ2	Present	Present	Present	Present	Present
chr6	158797697	158797978	53823	intron	SNORA116	Present	Present	Present	Present	Present
chr6	158799056	158799181	55104	intron	SNORA116	Present	Present	Present	Present	Present
chr6	158826397	158826848	82608	intron	SNORA116	Present	Present	Present	Present	Present
chr6	158827064	158827213	83124	intron	SNORA116	Present	Present	Present	Present	Present
chr6	159235068	159235356	-3799	intron	EZR-AS1	Present	Present	Present	Present	Present
chr6	160848363	160848567	79055	intron	SLC22A3	Present	Present	Present	Present	Present
chr6	161382105	161382253	-30580	Intergenic	MAP3K4	Present	Present	Present	Present	Present
chr6	163394308	163394533	80773	intron	PACRG-AS2	Present	Present	Present	Present	Present
chr6	163731311	163731519	14090	non-coding	PACRG-AS1	Present	Present	Present	Present	Present
chr6	163760148	163760307	7838	non-coding	DKFZp451B082	Present	Present	Present	Present	Present
chr6	163762637	163762785	5354	non-coding	DKFZp451B082	Present	Present	Present	Present	Present
chr6	164152333	164152435	-59868	Intergenic	LOC102724152	Present	Present	Present	Present	Present
chr6	164166961	164167311	-74620	Intergenic	LOC102724152	Present	Present	Present	Present	Present
chr6	164200565	164200636	-108084	Intergenic	LOC102724152	Present	Present	Present	Present	Present
chr6	164202062	164202496	-109763	Intergenic	LOC102724152	Present	Present	Present	Present	Present
chr6	164324743	164324791	-232251	Intergenic	LOC102724152	Present	Present	Present	Present	Present
chr6	164376220	164376385	-283786	Intergenic	LOC102724152	Present	Present	Present	Present	Present
chr6	164530217	164530464	-437824	Intergenic	LOC102724152	Present	Present	Present	Present	Present
chr6	166904699	166904875	18134	intron	MIR1913	Present	Present	Present	Present	Present
chr6	167554452	167554466	16860	Intergenic	GPR31	Present	Present	Present	Present	Present
chr6	168408285	168408437	-10192	Intergenic	KIF25	Present	Present	Present	Present	Present
chr6	169338771	169338961	25611	intron	LOC105378146	Present	Present	Present	Present	Present
chr6	169368392	169368693	-4065	Intergenic	LOC105378146	Present	Present	Present	Present	Present
chr6	169497559	169497747	29772	Intergenic	LOC102724357	Present	Present	Present	Present	Present
chr6	169588544	169588986	-5930	Intergenic	LINC02544	Present	Present	Present	Present	Present
chr6	170449208	170449507	-26509	Intergenic	LOC102724511	Present	Present	Present	Present	Present
chr7	3995838	3995992	-173402	intron	SDK1	Present	Present	Present	Present	Present
chr7	7139281	7139406	-2926	Intergenic	LOC100131257	Present	Present	Present	Present	Present
chr7	7361540	7361669	66819	Intergenic	LOC101927354	Present	Present	Present	Present	Present
chr7	9271461	9271681	-402329	Intergenic	PER4	Present	Present	Present	Present	Present
chr7	9290500	9290856	-383222	Intergenic	PER4	Present	Present	Present	Present	Present
chr7	13679068	13679389	346911	Intergenic	ETV1	Present	Present	Present	Present	Present
chr7	13781850	13781996	244216	Intergenic	ETV1	Present	Present	Present	Present	Present
chr7	20259496	20259916	2506	intron	LOC100506098	Present	Present	Present	Present	Present
chr7	20638523	20638650	-16704	Intergenic	ABCB5	Present	Present	Present	Present	Present
chr7	24376116	24376299	52398	Intergenic	NPY	Present	Present	Present	Present	Present
chr7	24406664	24406847	82946	Intergenic	NPY	Present	Present	Present	Present	Present
chr7	25676519	25676835	26083	intron	LOC646588	Present	Present	Present	Present	Present
chr7	25817735	25818209	-2153	intron	LOC646588	Present	Present	Present	Present	Present
chr7	28320253	28320449	-18589	Intergenic	CREB5	Present	Present	Present	Present	Present
chr7	28397964	28398324	-53993	intron	CREB5	Present	Present	Present	Present	Present
chr7	28722517	28722728	-3128	intron	CREB5	Present	Present	Present	Present	Present
chr7	28725373	28725656	-236	promoter-TSS	CREB5	Present	Present	Present	Present	Present
chr7	28824165	28824323	98494	intron	CREB5	Present	Present	Present	Present	Present
chr7	28940036	28940210	57823	Intergenic	TRIL	Present	Present	Present	Present	Present
chr7	29013397	29013528	-6121	Intergenic	LOC100506497	Present	Present	Present	Present	Present
chr7	29318383	29318598	-69904	intron	LOC102724484	Present	Present	Present	Present	Present
chr7	29441549	29441814	-77647	intron	CHN2	Present	Present	Present	Present	Present
chr7	30212682	30212882	38180	Intergenic	MTURN	Present	Present	Present	Present	Present
chr7	33801415	33801603	-143018	Intergenic	BMPER	Present	Present	Present	Present	Present
chr7	36854079	36854226	-89998	Intergenic	AOAH	Present	Present	Present	Present	Present
chr7	36985623	36985785	-26667	intron	MIR1200	Present	Present	Present	Present	Present
chr7	37071568	37071788	34277	intron	ELMO1-AS1	Present	Present	Present	Present	Present
chr7	37080097	37080239	42767	intron	ELMO1-AS1	Present	Present	Present	Present	Present
chr7	37329059	37329245	64120	intron	ELMO1	Present	Present	Present	Present	Present
chr7	37356058	37356244	37121	intron	ELMO1	Present	Present	Present	Present	Present
chr7	37389693	37389840	3506	intron	ELMO1	Present	Present	Present	Present	Present
chr7	37389915	37390095	3267	intron	ELMO1	Present	Present	Present	Present	Present
chr7	44934617	44934840	-9599	Intergenic	PURB	Present	Present	Present	Present	Present
chr7	51346591	51346748	37837	intron	COBL	Present	Present	Present	Present	Present
chr7	69205123	69205303	141752	intron	AUTS2	Present	Present	Present	Present	Present
chr7	69272661	69272854	209296	intron	AUTS2	Present	Present	Present	Present	Present
chr7	69557675	69557896	494324	intron	AUTS2	Present	Present	Present	Present	Present
chr7	69558559	69558740	495188	intron	AUTS2	Present	Present	Present	Present	Present
chr7	75993978	75994146	-5754	Intergenic	YWHAG	Present	Present	Present	Present	Present
chr7	77073524	77073760	-27976	Intergenic	GSAP	Present	Present	Present	Present	Present
chr7	79964818	79965005	38844	Intergenic	LOC101927269	Present	Present	Present	Present	Present
chr7	84331291	84331501	169604	Intergenic	LOC101927378	Present	Present	Present	Present	Present
chr7	84440879	84441031	279163	Intergenic	LOC101927378	Present	Present	Present	Present	Present
chr7	90254988	90255145	29431	intron	CDK14	Present	Present	Present	Present	Present
chr7	92324849	92325209	-105325	intron	FAM133B	Present	Present	Present	Present	Present
chr7	92384505	92384657	78692	intron	CDK6	Present	Present	Present	Present	Present
chr7	93174121	93174316	14904	intron	CALCR	Present	Present	Present	Present	Present
chr7	95101943	95102105	-13189	Intergenic	ASB4	Present	Present	Present	Present	Present
chr7	95102665	95102827	-12467	Intergenic	ASB4	Present	Present	Present	Present	Present
chr7	95105830	95105989	-9304	Intergenic	ASB4	Present	Present	Present	Present	Present
chr7	95107816	95108013	-7299	Intergenic	ASB4	Present	Present	Present	Present	Present
chr7	95496827	95496985	95088	intron	DYNC1I1	Present	Present	Present	Present	Present
chr7	98086264	98086488	-55974	Intergenic	BAIAP2L1	Present	Present	Present	Present	Present
chr7	98199192	98199561	-47221	Intergenic	NPTX2	Present	Present	Present	Present	Present
chr7	98407774	98408214	59643	Intergenic	TMEM130	Present	Present	Present	Present	Present
chr7	101897326	101897525	-31007	3'UTR	SH2B2	Present	Present	Present	Present	Present
chr7	103871109	103871342	-22730	Intergenic	ORC5	Present	Present	Present	Present	Present
chr7	105416550	105416779	-97055	intron	ATXN7L1	Present	Present	Present	Present	Present
chr7	107585882	107586134	54380	intron	DLD	Present	Present	Present	Present	Present
chr7	108082562	108082810	14155	intron	NRCAM	Present	Present	Present	Present	Present
chr7	108363854	108364020	153619	Intergenic	DNAJB9	Present	Present	Present	Present	Present
chr7	114024075	114024292	-30687	intron	FOXP2	Present	Present	Present	Present	Present
chr7	115957403	115957655	-30748	Intergenic	LOC102724434	Present	Present	Present	Present	Present
chr7	116754025	116754193	-23274	intron	ST7-AS2	Present	Present	Present	Present	Present
chr7	116869388	116869657	46787	intron	ST7-OT3	Present	Present	Present	Present	Present
chr7	129990769	129990955	6206	intron	CPA5	Present	Present	Present	Present	Present
chr7	129996222	129996448	10633	intron	LOC105375504	Present	Present	Present	Present	Present
chr7	129996625	129996902	10205	intron	LOC105375504	Present	Present	Present	Present	Present
chr7	130004921	130005149	1933	TTS	LOC105375504	Present	Present	Present	Present	Present
chr7	130005445	130005857	1317	non-coding	LOC105375504	Present	Present	Present	Present	Present
chr7	130027978	130028235	7771	TTS	CPA1	Present	Present	Present	Present	Present
chr7	131508997	131509120	-85921	Intergenic	LOC101928782	Present	Present	Present	Present	Present
chr7	133717137	133717255	-94897	intron	LRGUK	Present	Present	Present	Present	Present
chr7	150008907	150009008	2369	intron	LRRC61	Present	Present	Present	Present	Present
chr7	151503477	151503639	134	5'UTR	LOC644090	Present	Present	Present	Present	Present
chr7	157531804	157532047	-115352	intron	LOC100506585	Present	Present	Present	Present	Present
chr7	158800927	158801024	-70	promoter-TSS	LINC00689	Present	Present	Present	Present	Present
chr7	158801244	158801459	306	non-coding	LINC00689	Present	Present	Present	Present	Present
chr8	6590782	6591071	-11759	intron	MIR4659A	Present	Present	Present	Present	Present
chr8	8483420	8483592	-75941	Intergenic	CLDN23	Present	Present	Present	Present	Present
chr8	8522666	8522750	-36739	Intergenic	CLDN23	Present	Present	Present	Present	Present
chr8	8992822	8992854	15330	TTS	PPP1R3B	Present	Present	Present	Present	Present
chr8	23161555	23161804	16058	intron	R3HCC1	Present	Present	Present	Present	Present
chr8	23211506	23211855	17959	intron	LOC100507156	Present	Present	Present	Present	Present
chr8	23310179	23310481	4830	intron	ENTPD4	Present	Present	Present	Present	Present
chr8	23765466	23765627	-53227	Intergenic	STC1	Present	Present	Present	Present	Present
chr8	23780225	23780446	-68016	Intergenic	STC1	Present	Present	Present	Present	Present
chr8	23836833	23837031	-124613	Intergenic	STC1	Present	Present	Present	Present	Present
chr8	24079834	24080074	-71599	Intergenic	ADAM28	Present	Present	Present	Present	Present
chr8	27730118	27730506	13321	intron	MIR4287	Present	Present	Present	Present	Present
chr8	27822269	27822547	27782	intron	SCARA5	Present	Present	Present	Present	Present
chr8	27834797	27835012	15286	intron	SCARA5	Present	Present	Present	Present	Present
chr8	29630989	29631187	25263	intron	LINC02099	Present	Present	Present	Present	Present
chr8	29631656	29631918	25962	intron	LINC02099	Present	Present	Present	Present	Present
chr8	29762991	29763164	-15952	Intergenic	LINC02209	Present	Present	Present	Present	Present
chr8	33185249	33185426	145327	Intergenic	FUT10	Present	Present	Present	Present	Present
chr8	37002357	37002533	22974	intron	MIR1268A	Present	Present	Present	Present	Present
chr8	40180934	40181118	19856	Intergenic	SIRLNT	Present	Present	Present	Present	Present
chr8	40951386	40951493	177223	Intergenic	MIR548AO	Present	Present	Present	Present	Present
chr8	40951675	40951779	176935	Intergenic	MIR548AO	Present	Present	Present	Present	Present
chr8	41264182	41264322	-19922	Intergenic	SNORD65B	Present	Present	Present	Present	Present
chr8	41305117	41305317	21043	Intergenic	SNORD65B	Present	Present	Present	Present	Present
chr8	59069367	59069513	115220	Intergenic	LOC101929528	Present	Present	Present	Present	Present
chr8	59714149	59714360	-141842	Intergenic	NSMAF	Present	Present	Present	Present	Present
chr8	61760952	61761131	107223	intron	CHD7	Present	Present	Present	Present	Present
chr8	61856816	61857096	23351	Intergenic	LOC100130298	Present	Present	Present	Present	Present
chr8	69672189	69672337	344162	intron	LINC01592	Present	Present	Present	Present	Present
chr8	69689265	69689482	327052	intron	LINC01592	Present	Present	Present	Present	Present
chr8	71835110	71835287	253624	Intergenic	XKR9	Present	Present	Present	Present	Present
chr8	97532917	97533091	26963	intron	SDC2	Present	Present	Present	Present	Present
chr8	97632741	97633061	-24569	Intergenic	CPQ	Present	Present	Present	Present	Present
chr8	102772382	102772488	30762	intron	NCALD	Present	Present	Present	Present	Present
chr8	109683768	109683798	116040	intron	TMEM74	Present	Present	Present	Present	Present
chr8	123108793	123108931	-455182	Intergenic	HAS2	Present	Present	Present	Present	Present
chr8	123772531	123772773	-21242	Intergenic	ZHX2	Present	Present	Present	Present	Present
chr8	124924008	124924273	59913	intron	FER1L6	Present	Present	Present	Present	Present
chr8	124934406	124934582	70267	intron	FER1L6	Present	Present	Present	Present	Present
chr8	125649846	125650022	90780	intron	MTSS1	Present	Present	Present	Present	Present
chr8	125650693	125650960	89888	intron	MTSS1	Present	Present	Present	Present	Present
chr8	127387658	127387915	50046	Intergenic	LOC101927657	Present	Present	Present	Present	Present
chr8	127845917	127845994	-179444	Intergenic	PCAT1	Present	Present	Present	Present	Present
chr8	129337971	129338163	175705	Intergenic	MIR1208	Present	Present	Present	Present	Present
chr8	129436695	129436913	140121	intron	LINC00824	Present	Present	Present	Present	Present
chr8	129806867	129807093	171267	Intergenic	LINC00976	Present	Present	Present	Present	Present
chr8	129970152	129970556	7893	intron	LINC00976	Present	Present	Present	Present	Present
chr8	129985569	129985857	-7466	Intergenic	LINC00976	Present	Present	Present	Present	Present
chr8	130694232	130694430	-1846	Intergenic	CCDC26	Present	Present	Present	Present	Present
chr8	134250177	134250320	46966	3'UTR	CCN4	Present	Present	Present	Present	Present
chr8	135747133	135747284	-21934	Intergenic	ZFAT	Present	Present	Present	Present	Present
chr8	139576193	139576354	-66300	Intergenic	FAM135B	Present	Present	Present	Present	Present
chr8	139668437	139668545	-158518	intron	FAM135B	Present	Present	Present	Present	Present
chr9	345971	346350	73112	intron	DOCK8	Present	Present	Present	Present	Present
chr9	744872	745028	38273	intron	KANK1	Present	Present	Present	Present	Present
chr9	1031795	1032737	-15877	Intergenic	LINC01230	Present	Present	Present	Present	Present
chr9	1319952	1320103	268540	Intergenic	DMRT2	Present	Present	Present	Present	Present
chr9	1321151	1321316	269746	Intergenic	DMRT2	Present	Present	Present	Present	Present
chr9	1531369	1531630	480012	Intergenic	DMRT2	Present	Present	Present	Present	Present
chr9	1760016	1760182	-255248	Intergenic	SMARCA2	Present	Present	Present	Present	Present
chr9	2292066	2292332	133743	Intergenic	SMARCA2	Present	Present	Present	Present	Present
chr9	2469959	2470105	-151755	Intergenic	VLDLR	Present	Present	Present	Present	Present
chr9	2570742	2570958	-50937	intron	VLDLR	Present	Present	Present	Present	Present
chr9	7320159	7320452	479473	Intergenic	DMAC1	Present	Present	Present	Present	Present
chr9	8733682	8733847	182	intron	PTPRD	Present	Present	Present	Present	Present
chr9	8809896	8810113	-48014	intron	PTPRD-AS1	Present	Present	Present	Present	Present
chr9	9214138	9214301	356201	intron	PTPRD-AS1	Present	Present	Present	Present	Present
chr9	12776514	12776721	1598	intron	LURAP1L	Present	Present	Present	Present	Present
chr9	12955861	12956084	16660	Intergenic	SNORD137	Present	Present	Present	Present	Present
chr9	13181818	13182022	97643	intron	MPDZ	Present	Present	Present	Present	Present
chr9	13431152	13431326	89	promoter-TSS	LINC01235	Present	Present	Present	Present	Present
chr9	13529768	13529974	-98543	Intergenic	LINC01235	Present	Present	Present	Present	Present
chr9	13810503	13811008	-117215	Intergenic	LINC00583	Present	Present	Present	Present	Present
chr9	14089147	14089296	91580	intron	NFIB	Present	Present	Present	Present	Present
chr9	14395464	14395688	3406	intron	NFIB	Present	Present	Present	Present	Present
chr9	14395820	14395996	3074	intron	NFIB	Present	Present	Present	Present	Present
chr9	14515850	14516131	16085	intron	NFIB	Present	Present	Present	Present	Present
chr9	14517222	14517427	14751	intron	NFIB	Present	Present	Present	Present	Present
chr9	16136979	16137208	116012	Intergenic	C9orf92	Present	Present	Present	Present	Present
chr9	37676445	37676829	8631	intron		Present	Present	Present	Present	Present
chr9	37994969	37995178	74151	intron	SHB	Present	Present	Present	Present	Present
chr9	37997694	37997959	71398	intron	SHB	Present	Present	Present	Present	Present
chr9	38023035	38023291	46061	intron	SHB	Present	Present	Present	Present	Present
chr9	38024376	38024574	44749	intron	SHB	Present	Present	Present	Present	Present
chr9	38026299	38026521	42814	intron	SHB	Present	Present	Present	Present	Present
chr9	38227264	38227476	-158146	Intergenic	SHB	Present	Present	Present	Present	Present
chr9	38228831	38229428	-159905	Intergenic	SHB	Present	Present	Present	Present	Present
chr9	38229633	38229787	-160486	Intergenic	SHB	Present	Present	Present	Present	Present
chr9	38414229	38414521	10076	intron	IGFBPL1	Present	Present	Present	Present	Present
chr9	38673739	38673823	52696	Intergenic	FAM201A	Present	Present	Present	Present	Present
chr9	38677665	38678175	56835	Intergenic	FAM201A	Present	Present	Present	Present	Present
chr9	38680687	38681068	59792	Intergenic	FAM201A	Present	Present	Present	Present	Present
chr9	38681227	38681402	60229	Intergenic	FAM201A	Present	Present	Present	Present	Present
chr9	38720343	38720520	99346	Intergenic	FAM201A	Present	Present	Present	Present	Present
chr9	72157891	72158252	129216	intron	APBA1	Present	Present	Present	Present	Present
chr9	73179825	73179980	-150329	intron	KLF9	Present	Present	Present	Present	Present
chr9	73216112	73216221	-186593	intron	KLF9	Present	Present	Present	Present	Present
chr9	73216580	73216881	-187157	intron	KLF9	Present	Present	Present	Present	Present
chr9	81871785	81872019	-111321	Intergenic	LOC101927450	Present	Present	Present	Present	Present
chr9	84031877	84032031	272496	Intergenic	TLE1	Present	Present	Present	Present	Present
chr9	84441259	84441969	-86738	Intergenic	SPATA31D5P	Present	Present	Present	Present	Present
chr9	85228526	85228701	449444	Intergenic	RASEF	Present	Present	Present	Present	Present
chr9	86141871	86142135	11313	intron	FRMD3	Present	Present	Present	Present	Present
chr9	89161613	89162006	-192484	Intergenic	TUT7	Present	Present	Present	Present	Present
chr9	89164359	89164592	-195150	Intergenic	TUT7	Present	Present	Present	Present	Present
chr9	89518013	89518289	44270	Intergenic	GAS1	Present	Present	Present	Present	Present
chr9	89518535	89518802	43753	Intergenic	GAS1	Present	Present	Present	Present	Present
chr9	89554229	89554423	8095	Intergenic	GAS1	Present	Present	Present	Present	Present
chr9	89649285	89649434	7682	intron	LOC440173	Present	Present	Present	Present	Present
chr9	89775438	89775663	11991	TTS	C9orf170	Present	Present	Present	Present	Present
chr9	90211839	90212076	43588	intron	DAPK1-IT1	Present	Present	Present	Present	Present
chr9	90215017	90215235	46757	intron	DAPK1-IT1	Present	Present	Present	Present	Present
chr9	90255374	90255633	-85531	intron	CTSL	Present	Present	Present	Present	Present
chr9	90836176	90836341	-82862	Intergenic	SPATA31C2	Present	Present	Present	Present	Present
chr9	92208022	92208231	-11801	Intergenic	GADD45G	Present	Present	Present	Present	Present
chr9	92292586	92293305	38247	intron	UNQ6494	Present	Present	Present	Present	Present
chr9	92293700	92293886	39095	intron	UNQ6494	Present	Present	Present	Present	Present
chr9	92444524	92444842	189985	Intergenic	UNQ6494	Present	Present	Present	Present	Present
chr9	92447168	92447324	192548	Intergenic	UNQ6494	Present	Present	Present	Present	Present
chr9	92512028	92512248	-219560	Intergenic	LOC101927847	Present	Present	Present	Present	Present
chr9	92764973	92765352	20655	Intergenic	MIR4290	Present	Present	Present	Present	Present
chr9	92769894	92770177	15782	Intergenic	MIR4290	Present	Present	Present	Present	Present
chr9	92799440	92799778	4172	intron	MIR4290HG	Present	Present	Present	Present	Present
chr9	92858071	92858291	-54400	Intergenic	MIR4290HG	Present	Present	Present	Present	Present
chr9	97623280	97623623	51207	intron	MIR2278	Present	Present	Present	Present	Present
chr9	97735755	97736051	-28067	intron	LOC101928119	Present	Present	Present	Present	Present
chr9	99374581	99374746	7462	intron	CDC14B	Present	Present	Present	Present	Present
chr9	100055468	100055840	-13965	intron	CCDC180	Present	Present	Present	Present	Present
chr9	101546285	101546425	12482	exon	ANKS6	Present	Present	Present	Present	Present
chr9	101552943	101553101	5815	intron	ANKS6	Present	Present	Present	Present	Present
chr9	102873648	102873839	12218	intron	INVS	Present	Present	Present	Present	Present
chr9	108755466	108755752	298787	Intergenic	TMEM38B	Present	Present	Present	Present	Present
chr9	109900612	109900872	-35473	Intergenic	LOC340512	Present	Present	Present	Present	Present
chr9	110492954	110493351	-241102	Intergenic	KLF4	Present	Present	Present	Present	Present
chr9	112027499	112027659	55665	intron	EPB41L4B	Present	Present	Present	Present	Present
chr9	114688885	114689067	-5404	intron	MIR4668	Present	Present	Present	Present	Present
chr9	114803801	114804438	109739	intron	MIR4668	Present	Present	Present	Present	Present
chr9	116075611	116075813	-10056	non-coding		Present	Present	Present	Present	Present
chr9	116382925	116383193	26650	Intergenic	RGS3	Present	Present	Present	Present	Present
chr9	116383851	116384040	27536	Intergenic	RGS3	Present	Present	Present	Present	Present
chr9	116437955	116438097	81617	Intergenic	RGS3	Present	Present	Present	Present	Present
chr9	117880822	117881076	-513	promoter-TSS	TNC	Present	Present	Present	Present	Present
chr9	117888722	117888947	-8398	intron	TNC	Present	Present	Present	Present	Present
chr9	117926964	117927150	22960	intron	DEC1	Present	Present	Present	Present	Present
chr9	117965517	117965734	61528	intron	DEC1	Present	Present	Present	Present	Present
chr9	118017193	118017386	113192	intron	DEC1	Present	Present	Present	Present	Present
chr9	119851194	119851275	92246	intron	SNORA70C	Present	Present	Present	Present	Present
chr9	120225139	120225482	-47975	Intergenic	ASTN2	Present	Present	Present	Present	Present
chr9	120535263	120535583	68742	Intergenic	TLR4	Present	Present	Present	Present	Present
chr9	121721752	121721979	279916	Intergenic	LINC02578	Present	Present	Present	Present	Present
chr9	121788483	121788740	343102	Intergenic	BRINP1	Present	Present	Present	Present	Present
chr9	122696867	122697129	-340	promoter-TSS	LINC01613	Present	Present	Present	Present	Present
chr9	122726236	122726384	28972	Intergenic	LINC01613	Present	Present	Present	Present	Present
chr9	124023564	124023710	-6803	intron	GSN	Present	Present	Present	Present	Present
chr9	124161951	124162118	-29452	Intergenic	STOM	Present	Present	Present	Present	Present
chr9	126841585	126841814	67652	Intergenic	LHX2	Present	Present	Present	Present	Present
chr9	127059134	127059326	4531	intron	NEK6	Present	Present	Present	Present	Present
chr9	127059704	127060020	5163	intron	NEK6	Present	Present	Present	Present	Present
chr9	128208888	128209132	184905	intron	GAPVD1	Present	Present	Present	Present	Present
chr9	132881544	132881812	24820	intron	GPRACR	Present	Present	Present	Present	Present
chr9	132882224	132882495	24139	intron	GPRACR	Present	Present	Present	Present	Present
chr9	132999477	132999685	-4085	TTS	MIR12126	Present	Present	Present	Present	Present
chr9	133297266	133297470	-22726	intron	ASS1	Present	Present	Present	Present	Present
chr9	134258643	134258797	-46757	Intergenic	PRRC2B	Present	Present	Present	Present	Present
chr9	134484123	134484222	63262	intron	PRRT1B	Present	Present	Present	Present	Present
chr9	134500035	134500572	79393	intron	PRRT1B	Present	Present	Present	Present	Present
chr9	134579634	134579859	5483	intron	RAPGEF1	Present	Present	Present	Present	Present
chr9	134609622	134609896	3166	intron	RAPGEF1	Present	Present	Present	Present	Present
chr9	134715187	134715342	-99933	Intergenic	RAPGEF1	Present	Present	Present	Present	Present
chr9	134868736	134869022	86375	intron	MED27	Present	Present	Present	Present	Present
chr9	134870197	134870498	84907	intron	MED27	Present	Present	Present	Present	Present
chr9	137627462	137627622	-82853	intron	COL5A1-AS1	Present	Present	Present	Present	Present
chr9	140031623	140031639	-1975	Intergenic	GRIN1	Present	Present	Present	Present	Present
chrX	131965677	131965832	129644	intron	HS6ST2	Present	Present	Present	Present	Present
chrX	133765788	133765956	26629	intron	PLAC1	Present	Present	Present	Present	Present
chr1	1503054	1503236	7098	intron	SSU72	Present	Absent	Absent	Absent	Absent
chr1	1530335	1530954	-4169	Intergenic	LOC105378586	Present	Absent	Absent	Absent	Absent
chr1	1531301	1531750	-3288	Intergenic	LOC105378586	Present	Absent	Absent	Absent	Absent
chr1	8403500	8403707	25458	intron	SLC45A1	Present	Absent	Absent	Absent	Absent
chr1	10568685	10568861	33766	intron	PEX14	Present	Absent	Absent	Absent	Absent
chr1	11028691	11028853	-2028	intron	C1orf127	Present	Absent	Absent	Absent	Absent
chr1	12534017	12534196	-33194	intron	SNORA59A	Present	Absent	Absent	Absent	Absent
chr1	15791095	15791343	7992	intron	CELA2A	Present	Absent	Absent	Absent	Absent
chr1	15811005	15811251	8529	intron	CELA2B	Present	Absent	Absent	Absent	Absent
chr1	16930369	16930570	9631	intron	NBPF1	Present	Absent	Absent	Absent	Absent
chr1	16931505	16931654	8521	intron	NBPF1	Present	Absent	Absent	Absent	Absent
chr1	18381844	18381996	-10231	Intergenic	LINC01654	Present	Absent	Absent	Absent	Absent
chr1	20357702	20357860	-38906	Intergenic	PLA2G5	Present	Absent	Absent	Absent	Absent
chr1	20700042	20700188	55172	non-coding	LINC01141	Present	Absent	Absent	Absent	Absent
chr1	22023516	22023685	-27750	intron	RAP1GAP	Present	Absent	Absent	Absent	Absent
chr1	26058173	26058416	-68390	intron	SELENON	Present	Absent	Absent	Absent	Absent
chr1	30947465	30947774	-244000	Intergenic	MATN1-AS1	Present	Absent	Absent	Absent	Absent
chr1	30951106	30951339	-240397	Intergenic	MATN1-AS1	Present	Absent	Absent	Absent	Absent
chr1	31000461	31000656	-191061	Intergenic	MATN1-AS1	Present	Absent	Absent	Absent	Absent
chr1	31700793	31701117	11779	intron	NKAIN1	Present	Absent	Absent	Absent	Absent
chr1	31706953	31707101	5707	intron	NKAIN1	Present	Absent	Absent	Absent	Absent
chr1	32242066	32242212	-12198	Intergenic	ADGRB2	Present	Absent	Absent	Absent	Absent
chr1	32242294	32242457	-12434	Intergenic	ADGRB2	Present	Absent	Absent	Absent	Absent
chr1	42675694	42675890	-45376	intron	GUCA2A	Present	Absent	Absent	Absent	Absent
chr1	44971050	44971546	-39867	intron	MIR5584	Present	Absent	Absent	Absent	Absent
chr1	46990952	46991233	10095	Intergenic	TMEM275	Present	Absent	Absent	Absent	Absent
chr1	50889335	50889538	-321	promoter-TSS	DMRTA2	Present	Absent	Absent	Absent	Absent
chr1	51693302	51693561	7337	intron	LINC01562	Present	Absent	Absent	Absent	Absent
chr1	57736687	57736938	151972	intron	DAB1	Present	Absent	Absent	Absent	Absent
chr1	60227196	60227398	-11170	intron	LOC101926944	Present	Absent	Absent	Absent	Absent
chr1	62729253	62729535	55711	intron	KANK4	Present	Absent	Absent	Absent	Absent
chr1	68152420	68152656	1654	intron	GADD45A	Present	Absent	Absent	Absent	Absent
chr1	68166438	68166602	15636	TTS	GADD45A	Present	Absent	Absent	Absent	Absent
chr1	80519907	80520086	-481444	Intergenic	LINC01781	Present	Absent	Absent	Absent	Absent
chr1	84158785	84158966	167354	intron	LOC101927560	Present	Absent	Absent	Absent	Absent
chr1	87644909	87645096	-33350	Intergenic	LINC02801	Present	Absent	Absent	Absent	Absent
chr1	88208289	88208469	-371041	Intergenic	LINC01364	Present	Absent	Absent	Absent	Absent
chr1	89113061	89113282	-36656	intron	PKN2	Present	Absent	Absent	Absent	Absent
chr1	91590188	91590466	-102515	Intergenic	ZNF644	Present	Absent	Absent	Absent	Absent
chr1	92256750	92257026	94820	intron	TGFBR3	Present	Absent	Absent	Absent	Absent
chr1	94204532	94204776	36285	intron	MIG7	Present	Absent	Absent	Absent	Absent
chr1	95391188	95391477	32	promoter-TSS	CNN3	Present	Absent	Absent	Absent	Absent
chr1	95663540	95663765	35886	TTS	LOC101928118	Present	Absent	Absent	Absent	Absent
chr1	100140401	100140580	28821	intron	PALMD	Present	Absent	Absent	Absent	Absent
chr1	100271409	100271591	-39309	Intergenic	FRRS1	Present	Absent	Absent	Absent	Absent
chr1	101226094	101226255	40876	Intergenic	VCAM1	Present	Absent	Absent	Absent	Absent
chr1	110041222	110041387	4588	3'UTR	CYB561D1	Present	Absent	Absent	Absent	Absent
chr1	110348247	110348395	-41776	Intergenic	EPS8L3	Present	Absent	Absent	Absent	Absent
chr1	110450971	110451123	-2424	Intergenic	CSF1	Present	Absent	Absent	Absent	Absent
chr1	112447064	112447395	-5050	intron	KCND3-AS1	Present	Absent	Absent	Absent	Absent
chr1	117156549	117156718	-42918	exon	CD58	Present	Absent	Absent	Absent	Absent
chr1	117665386	117665534	-1089	Intergenic	TRIM45	Present	Absent	Absent	Absent	Absent
chr1	117724453	117724656	21904	intron	VTCN1	Present	Absent	Absent	Absent	Absent
chr1	118326320	118326480	145844	Intergenic	GDAP2	Present	Absent	Absent	Absent	Absent
chr1	118884086	118884290	-156337	Intergenic	SPAG17	Present	Absent	Absent	Absent	Absent
chr1	119326132	119326301	204750	Intergenic	TBX15	Present	Absent	Absent	Absent	Absent
chr1	119516279	119516478	14588	intron	TBX15	Present	Absent	Absent	Absent	Absent
chr1	120129982	120130320	11763	Intergenic	LINC00622	Present	Absent	Absent	Absent	Absent
chr1	120602037	120602246	10109	intron	NOTCH2NLR	Present	Absent	Absent	Absent	Absent
chr1	144013915	144014098	-99159	Intergenic	FAM72D	Present	Absent	Absent	Absent	Absent
chr1	144854438	144854588	77519	non-coding	PDE4DIP	Present	Absent	Absent	Absent	Absent
chr1	144871686	144871832	60273	non-coding	PDE4DIP	Present	Absent	Absent	Absent	Absent
chr1	144930607	144930753	1352	exon	PDE4DIP	Present	Absent	Absent	Absent	Absent
chr1	144931338	144931601	563	exon	PDE4DIP	Present	Absent	Absent	Absent	Absent
chr1	145014118	145014293	-17094	intron	PDE4DIP	Present	Absent	Absent	Absent	Absent
chr1	145291941	145292094	-1354	intron	NBPF10	Present	Absent	Absent	Absent	Absent
chr1	145293324	145293507	44	promoter-TSS	NBPF10	Present	Absent	Absent	Absent	Absent
chr1	145738997	145739166	11383	intron		Present	Absent	Absent	Absent	Absent
chr1	146906762	146906956	82840	intron	LINC00624	Present	Absent	Absent	Absent	Absent
chr1	147787243	147787653	19230	intron	MIR5087	Present	Absent	Absent	Absent	Absent
chr1	152080259	152081717	6942	exon	TCHH	Present	Absent	Absent	Absent	Absent
chr1	152081813	152081970	6039	exon	TCHH	Present	Absent	Absent	Absent	Absent
chr1	154786099	154786274	46166	intron	KCNN3	Present	Absent	Absent	Absent	Absent
chr1	156609511	156609732	-2288	Intergenic	BCAN	Present	Absent	Absent	Absent	Absent
chr1	156633121	156633269	14004	Intergenic	NES	Present	Absent	Absent	Absent	Absent
chr1	156634153	156634483	12881	Intergenic	NES	Present	Absent	Absent	Absent	Absent
chr1	156645668	156645814	1458	intron	NES	Present	Absent	Absent	Absent	Absent
chr1	156895987	156896148	5643	intron	LRRC71	Present	Absent	Absent	Absent	Absent
chr1	159024989	159025291	21416	TTS	AIM2	Present	Absent	Absent	Absent	Absent
chr1	162115218	162115450	-11563	intron	MIR4654	Present	Absent	Absent	Absent	Absent
chr1	162816772	162817009	21715	Intergenic	CCDC190	Present	Absent	Absent	Absent	Absent
chr1	164485059	164485205	-43465	Intergenic	PBX1	Present	Absent	Absent	Absent	Absent
chr1	164744082	164744389	-357	promoter-TSS	LOC100505795	Present	Absent	Absent	Absent	Absent
chr1	165131803	165132038	193558	Intergenic	LMX1A	Present	Absent	Absent	Absent	Absent
chr1	165364730	165365022	29345	Intergenic	RXRG	Present	Absent	Absent	Absent	Absent
chr1	165533725	165534042	17509	TTS	LRRC52-AS1	Present	Absent	Absent	Absent	Absent
chr1	165541604	165541814	9683	intron	LRRC52-AS1	Present	Absent	Absent	Absent	Absent
chr1	168435542	168435738	29242	intron	LOC101928565	Present	Absent	Absent	Absent	Absent
chr1	170637528	170637821	4402	intron	PRRX1	Present	Absent	Absent	Absent	Absent
chr1	173227659	173227891	-51305	intron	TNFSF4	Present	Absent	Absent	Absent	Absent
chr1	178614739	178614918	-32056	Intergenic	MIR4424	Present	Absent	Absent	Absent	Absent
chr1	179729689	179729835	17336	intron	FAM163A	Present	Absent	Absent	Absent	Absent
chr1	179730441	179730670	18129	intron	FAM163A	Present	Absent	Absent	Absent	Absent
chr1	180179365	180179666	-19884	Intergenic	LHX4	Present	Absent	Absent	Absent	Absent
chr1	180935944	180936163	-12030	Intergenic	KIAA1614-AS1	Present	Absent	Absent	Absent	Absent
chr1	182089988	182090328	-59311	Intergenic	ZNF648	Present	Absent	Absent	Absent	Absent
chr1	187459995	187460152	47313	Intergenic	LINC01037	Present	Absent	Absent	Absent	Absent
chr1	201391604	201391801	-844	promoter-TSS	TNNI1	Present	Absent	Absent	Absent	Absent
chr1	203021145	203021320	25613	intron	PPFIA4	Present	Absent	Absent	Absent	Absent
chr1	203142844	203143043	2011	intron	MYBPH	Present	Absent	Absent	Absent	Absent
chr1	204893392	204893720	-19798	intron	NFASC	Present	Absent	Absent	Absent	Absent
chr1	204896807	204897165	-16368	intron	NFASC	Present	Absent	Absent	Absent	Absent
chr1	204898160	204898330	-15109	intron	NFASC	Present	Absent	Absent	Absent	Absent
chr1	205414107	205414267	3339	intron	MIR135B	Present	Absent	Absent	Absent	Absent
chr1	208548107	208548255	-130452	Intergenic	PLXNA2	Present	Absent	Absent	Absent	Absent
chr1	208946327	208946530	44395	Intergenic	LINC01717	Present	Absent	Absent	Absent	Absent
chr1	209330892	209331069	-167821	Intergenic	LINC01696	Present	Absent	Absent	Absent	Absent
chr1	209331359	209331524	-167360	Intergenic	LINC01696	Present	Absent	Absent	Absent	Absent
chr1	209721080	209721407	-35816	Intergenic	CAMK1G	Present	Absent	Absent	Absent	Absent
chr1	212106121	212106356	101935	Intergenic	LPGAT1-AS1	Present	Absent	Absent	Absent	Absent
chr1	212623953	212624259	17844	Intergenic	NENF	Present	Absent	Absent	Absent	Absent
chr1	212705252	212705434	-13693	Intergenic	LINC01740	Present	Absent	Absent	Absent	Absent
chr1	213131660	213131834	7864	intron	VASH2	Present	Absent	Absent	Absent	Absent
chr1	213152741	213153039	29007	intron	VASH2	Present	Absent	Absent	Absent	Absent
chr1	214170500	214170669	8708	exon	PROX1	Present	Absent	Absent	Absent	Absent
chr1	214203239	214203443	41465	intron	PROX1	Present	Absent	Absent	Absent	Absent
chr1	218509745	218509906	-8801	3'UTR	TGFB2	Present	Absent	Absent	Absent	Absent
chr1	218845053	218845218	161698	intron	C1orf143	Present	Absent	Absent	Absent	Absent
chr1	219025111	219025308	66644	intron	LINC01710	Present	Absent	Absent	Absent	Absent
chr1	221079270	221079508	-25907	Intergenic	HLX-AS1	Present	Absent	Absent	Absent	Absent
chr1	221096351	221096601	-42994	Intergenic	HLX-AS1	Present	Absent	Absent	Absent	Absent
chr1	223196474	223196731	94836	Intergenic	DISP1	Present	Absent	Absent	Absent	Absent
chr1	226971038	226971237	-44261	Intergenic	ITPKB	Present	Absent	Absent	Absent	Absent
chr1	227060360	227060541	2133	intron	PSEN2	Present	Absent	Absent	Absent	Absent
chr1	229283987	229284338	26386	Intergenic	MIR4454	Present	Absent	Absent	Absent	Absent
chr1	229546495	229546814	23189	Intergenic	ACTA1	Present	Absent	Absent	Absent	Absent
chr1	230757098	230757436	-20960	Intergenic	COG2	Present	Absent	Absent	Absent	Absent
chr1	233004790	233004941	64227	Intergenic	MAP10	Present	Absent	Absent	Absent	Absent
chr1	233979401	233979587	-60928	Intergenic	SLC35F3	Present	Absent	Absent	Absent	Absent
chr1	234774812	234775107	-7076	Intergenic	LOC101927787	Present	Absent	Absent	Absent	Absent
chr1	234859927	234860152	250	intron	LINC01132	Present	Absent	Absent	Absent	Absent
chr1	239974595	239974753	88498	intron	CHRM3-AS1	Present	Absent	Absent	Absent	Absent
chr1	242348313	242348559	-186036	intron	MAP1LC3C	Present	Absent	Absent	Absent	Absent
chr1	244377613	244377854	-138204	Intergenic	C1orf100	Present	Absent	Absent	Absent	Absent
chr1	247909774	247909964	1591	intron	OR14A2	Present	Absent	Absent	Absent	Absent
chr10	4892683	4892905	24395	Intergenic	AKR1E2	Present	Absent	Absent	Absent	Absent
chr10	7417504	7417673	33715	intron	SFMBT2	Present	Absent	Absent	Absent	Absent
chr10	11054430	11054641	-5300	intron	CELF2	Present	Absent	Absent	Absent	Absent
chr10	14116516	14116717	333	non-coding	LOC101928453	Present	Absent	Absent	Absent	Absent
chr10	17248507	17248668	-4517	Intergenic	TRDMT1	Present	Absent	Absent	Absent	Absent
chr10	18755840	18756018	66425	intron	CACNB2	Present	Absent	Absent	Absent	Absent
chr10	22742900	22743160	-16172	Intergenic	LOC100499489	Present	Absent	Absent	Absent	Absent
chr10	23439119	23439351	-42006	Intergenic	PTF1A	Present	Absent	Absent	Absent	Absent
chr10	24207349	24207546	223791	intron	KIAA1217	Present	Absent	Absent	Absent	Absent
chr10	26524814	26525032	19220	intron	GAD2	Present	Absent	Absent	Absent	Absent
chr10	29948129	29948408	-24368	intron	SVIL	Present	Absent	Absent	Absent	Absent
chr10	30020777	30021010	3837	intron	SVIL	Present	Absent	Absent	Absent	Absent
chr10	31908174	31908320	-219563	Intergenic	LOC100505502	Present	Absent	Absent	Absent	Absent
chr10	31953786	31954027	243948	Intergenic	ARHGAP12	Present	Absent	Absent	Absent	Absent
chr10	33341501	33341706	64132	Intergenic	IATPR	Present	Absent	Absent	Absent	Absent
chr10	35207503	35207663	102887	Intergenic	PARD3-AS1	Present	Absent	Absent	Absent	Absent
chr10	35869079	35869284	-25088	Intergenic	GJD4	Present	Absent	Absent	Absent	Absent
chr10	36473533	36473679	406376	Intergenic	PCAT5	Present	Absent	Absent	Absent	Absent
chr10	47050190	47050558	-31446	Intergenic	NPY4R2	Present	Absent	Absent	Absent	Absent
chr10	47094989	47095165	11543	Intergenic	NPY4R	Present	Absent	Absent	Absent	Absent
chr10	50332110	50332276	2309	intron	FAM170B-AS1	Present	Absent	Absent	Absent	Absent
chr10	50503457	50503674	3373	TTS	C10orf71-AS1	Present	Absent	Absent	Absent	Absent
chr10	50603028	50603289	977	intron	DRGX	Present	Absent	Absent	Absent	Absent
chr10	56559332	56559509	1571	intron	PCDH15	Present	Absent	Absent	Absent	Absent
chr10	62036205	62036386	113338	intron	ANK3	Present	Absent	Absent	Absent	Absent
chr10	72303658	72304080	58628	intron	PRF1	Present	Absent	Absent	Absent	Absent
chr10	72884690	72884836	-87564	Intergenic	UNC5B	Present	Absent	Absent	Absent	Absent
chr10	76681647	76681799	9179	intron	LOC101929165	Present	Absent	Absent	Absent	Absent
chr10	79191175	79191425	80670	intron	KCNMA1-AS3	Present	Absent	Absent	Absent	Absent
chr10	81266695	81266992	3895	TTS	LOC729815	Present	Absent	Absent	Absent	Absent
chr10	81447318	81447465	4660	non-coding	BEND3P3	Present	Absent	Absent	Absent	Absent
chr10	93808202	93808379	124763	3'UTR	BTAF1	Present	Absent	Absent	Absent	Absent
chr10	95762040	95762186	8425	intron	PLCE1	Present	Absent	Absent	Absent	Absent
chr10	96980993	96981149	27114	intron	ACSM6	Present	Absent	Absent	Absent	Absent
chr10	97304651	97304826	16390	intron	SORBS1	Present	Absent	Absent	Absent	Absent
chr10	98179249	98179430	-60217	intron	OPALIN	Present	Absent	Absent	Absent	Absent
chr10	102562330	102562544	56969	intron	PAX2	Present	Absent	Absent	Absent	Absent
chr10	103124512	103124736	10702	intron	BTRC	Present	Absent	Absent	Absent	Absent
chr10	103530727	103530982	5017	intron	FGF8	Present	Absent	Absent	Absent	Absent
chr10	104086882	104087057	-66898	intron	NFKB2	Present	Absent	Absent	Absent	Absent
chr10	108685016	108685205	239354	intron	SORCS1	Present	Absent	Absent	Absent	Absent
chr10	108747252	108747398	177139	intron	SORCS1	Present	Absent	Absent	Absent	Absent
chr10	108850893	108851073	73481	intron	SORCS1	Present	Absent	Absent	Absent	Absent
chr10	110035778	110035937	-206806	Intergenic	LINC01435	Present	Absent	Absent	Absent	Absent
chr10	112379977	112380123	-24044	Intergenic	RBM20	Present	Absent	Absent	Absent	Absent
chr10	112410224	112410477	6256	intron	RBM20	Present	Absent	Absent	Absent	Absent
chr10	113076450	113076705	202528	Intergenic	HEAT2	Present	Absent	Absent	Absent	Absent
chr10	114543444	114543629	-39719	intron	LOC103344931	Present	Absent	Absent	Absent	Absent
chr10	114586891	114587171	3776	non-coding	LOC103344931	Present	Absent	Absent	Absent	Absent
chr10	116122647	116122813	41531	5'UTR	AFAP1L2	Present	Absent	Absent	Absent	Absent
chr10	116391927	116392103	141	5'UTR	ABLIM1	Present	Absent	Absent	Absent	Absent
chr10	120591967	120592151	-77577	Intergenic	CACUL1	Present	Absent	Absent	Absent	Absent
chr10	120666619	120666900	-122467	Intergenic	NANOS1	Present	Absent	Absent	Absent	Absent
chr10	122872269	122872423	261472	Intergenic	WDR11	Present	Absent	Absent	Absent	Absent
chr10	123318886	123319058	-28144	intron	FGFR2	Present	Absent	Absent	Absent	Absent
chr10	123443421	123443618	-85547	Intergenic	FGFR2	Present	Absent	Absent	Absent	Absent
chr10	123469833	123469981	-111935	Intergenic	FGFR2	Present	Absent	Absent	Absent	Absent
chr10	125140929	125141100	227096	Intergenic	BUB3	Present	Absent	Absent	Absent	Absent
chr10	129020784	129020938	-26006	intron	INSYN2A	Present	Absent	Absent	Absent	Absent
chr10	134556368	134556685	43125	intron	NKX6-2	Present	Absent	Absent	Absent	Absent
chr10	135428264	135428640	11847	Intergenic	FRG2B	Present	Absent	Absent	Absent	Absent
chr11	1866385	1866551	5031	Intergenic	TNNI2	Present	Absent	Absent	Absent	Absent
chr11	1975004	1975528	4705	intron	SNORD131	Present	Absent	Absent	Absent	Absent
chr11	1988944	1989191	18506	Intergenic	SNORD131	Present	Absent	Absent	Absent	Absent
chr11	2002093	2002280	8964	Intergenic	MRPL23-AS1	Present	Absent	Absent	Absent	Absent
chr11	2217696	2218504	23807	Intergenic	MIR4686	Present	Absent	Absent	Absent	Absent
chr11	2232396	2232613	38211	Intergenic	MIR4686	Present	Absent	Absent	Absent	Absent
chr11	2675145	2675425	45943	non-coding	KCNQ1OT1	Present	Absent	Absent	Absent	Absent
chr11	6323110	6323286	18533	Intergenic	CAVIN3	Present	Absent	Absent	Absent	Absent
chr11	7597444	7597605	-474	promoter-TSS	PPFIBP2	Present	Absent	Absent	Absent	Absent
chr11	12265129	12265315	-43225	intron	MICALCL	Present	Absent	Absent	Absent	Absent
chr11	13148143	13148289	117353	Intergenic	RASSF10	Present	Absent	Absent	Absent	Absent
chr11	16958274	16958529	-10832	intron	SNORD147	Present	Absent	Absent	Absent	Absent
chr11	17717519	17717683	885	intron	LINC02729	Present	Absent	Absent	Absent	Absent
chr11	17786521	17786733	29132	intron	KCNC1	Present	Absent	Absent	Absent	Absent
chr11	19373962	19374243	1831	intron	NAV2	Present	Absent	Absent	Absent	Absent
chr11	20180221	20180563	1629	intron	DBX1	Present	Absent	Absent	Absent	Absent
chr11	20243168	20243436	-61281	Intergenic	DBX1	Present	Absent	Absent	Absent	Absent
chr11	20298810	20299039	-86307	Intergenic	HTATIP2	Present	Absent	Absent	Absent	Absent
chr11	20791953	20792159	100924	intron	NELL1	Present	Absent	Absent	Absent	Absent
chr11	24881457	24881654	362956	intron	LUZP2	Present	Absent	Absent	Absent	Absent
chr11	28131740	28131981	1925	5'UTR	METTL15	Present	Absent	Absent	Absent	Absent
chr11	30386202	30386356	41628	Intergenic	ARL14EP	Present	Absent	Absent	Absent	Absent
chr11	30409346	30409972	65008	3'UTR	ARL14EP	Present	Absent	Absent	Absent	Absent
chr11	30445571	30445732	101000	intron	ARL14EP	Present	Absent	Absent	Absent	Absent
chr11	34214640	34214942	87615	intron	NAT10	Present	Absent	Absent	Absent	Absent
chr11	36054754	36055273	23365	intron	MIR3973	Present	Absent	Absent	Absent	Absent
chr11	36469680	36469861	47223	intron	PRR5L	Present	Absent	Absent	Absent	Absent
chr11	37883344	37883551	-76704	Intergenic	LINC02760	Present	Absent	Absent	Absent	Absent
chr11	43760529	43760726	58339	intron	HSD17B12	Present	Absent	Absent	Absent	Absent
chr11	44257938	44258084	73678	intron	ALX4	Present	Absent	Absent	Absent	Absent
chr11	44281746	44281903	49865	TTS	ALX4	Present	Absent	Absent	Absent	Absent
chr11	44425981	44426182	-94392	Intergenic	ALX4	Present	Absent	Absent	Absent	Absent
chr11	47600452	47600631	-19	promoter-TSS	KBTBD4	Present	Absent	Absent	Absent	Absent
chr11	61273155	61273438	-2772	Intergenic	MIR4488	Present	Absent	Absent	Absent	Absent
chr11	62306047	62306193	7016	intron	AHNAK	Present	Absent	Absent	Absent	Absent
chr11	64297199	64297373	-26127	Intergenic	SLC22A11	Present	Absent	Absent	Absent	Absent
chr11	66115520	66115783	189	promoter-TSS	LOC102724064	Present	Absent	Absent	Absent	Absent
chr11	66137228	66137446	1894	intron	SLC29A2	Present	Absent	Absent	Absent	Absent
chr11	68731448	68731594	16934	Intergenic	MRGPRD	Present	Absent	Absent	Absent	Absent
chr11	70842941	70843137	92803	intron	SHANK2	Present	Absent	Absent	Absent	Absent
chr11	71511226	71511434	12770	3'UTR	FAM86C1	Present	Absent	Absent	Absent	Absent
chr11	75350927	75351119	28456	intron	MAP6	Present	Absent	Absent	Absent	Absent
chr11	76002696	76002894	-85249	Intergenic	WNT11	Present	Absent	Absent	Absent	Absent
chr11	76119538	76119712	27258	TTS	GVQW3	Present	Absent	Absent	Absent	Absent
chr11	76944071	76944217	68567	exon	GDPD4	Present	Absent	Absent	Absent	Absent
chr11	77753245	77753391	3919	intron	KCTD14	Present	Absent	Absent	Absent	Absent
chr11	78651638	78651885	-365852	intron	NARS2	Present	Absent	Absent	Absent	Absent
chr11	79063494	79063699	49557	intron	MIR708	Present	Absent	Absent	Absent	Absent
chr11	79223881	79224039	-71886	Intergenic	TENM4	Present	Absent	Absent	Absent	Absent
chr11	85491479	85491630	-22442	intron	SYTL2	Present	Absent	Absent	Absent	Absent
chr11	86389436	86389582	-5831	Intergenic	ME3	Present	Absent	Absent	Absent	Absent
chr11	92738483	92738656	35780	Intergenic	MTNR1B	Present	Absent	Absent	Absent	Absent
chr11	106353703	106353938	231686	Intergenic	LOC101928535	Present	Absent	Absent	Absent	Absent
chr11	113157285	113157451	-12745	Intergenic	NCAM1-AS1	Present	Absent	Absent	Absent	Absent
chr11	115740543	115740862	-109784	Intergenic	LINC00900	Present	Absent	Absent	Absent	Absent
chr11	115782435	115782948	-151773	Intergenic	LINC00900	Present	Absent	Absent	Absent	Absent
chr11	115906901	115907049	-276057	Intergenic	LINC00900	Present	Absent	Absent	Absent	Absent
chr11	116045003	116045256	-414211	Intergenic	LINC00900	Present	Absent	Absent	Absent	Absent
chr11	116078067	116078324	-431944	Intergenic	LINC02702	Present	Absent	Absent	Absent	Absent
chr11	117399051	117399318	200614	intron	CEP164	Present	Absent	Absent	Absent	Absent
chr11	119514118	119514588	85557	intron	NECTIN1	Present	Absent	Absent	Absent	Absent
chr11	119518076	119518276	81734	intron	NECTIN1	Present	Absent	Absent	Absent	Absent
chr11	119753115	119753292	152910	Intergenic	LOC102724301	Present	Absent	Absent	Absent	Absent
chr11	121110815	121111027	-52559	Intergenic	SC5D	Present	Absent	Absent	Absent	Absent
chr11	121800350	121800594	170080	Intergenic	MIR125B1	Present	Absent	Absent	Absent	Absent
chr11	121895085	121895370	75325	Intergenic	MIR125B1	Present	Absent	Absent	Absent	Absent
chr11	122714071	122714231	4943	intron	CRTAM	Present	Absent	Absent	Absent	Absent
chr11	125974382	125974568	-41288	Intergenic	CDON	Present	Absent	Absent	Absent	Absent
chr11	126384720	126384869	108812	intron	ST3GAL4	Present	Absent	Absent	Absent	Absent
chr11	126867143	126867317	3436	intron	KIRREL3	Present	Absent	Absent	Absent	Absent
chr11	128799936	128800255	7634	Intergenic	TP53AIP1	Present	Absent	Absent	Absent	Absent
chr11	130403468	130403772	84751	Intergenic	ADAMTS15	Present	Absent	Absent	Absent	Absent
chr12	701356	701589	-5820	intron	LOC105369595	Present	Absent	Absent	Absent	Absent
chr12	3424408	3424753	50708	intron	LOC100128253	Present	Absent	Absent	Absent	Absent
chr12	4115113	4115564	-132724	Intergenic	PARP11	Present	Absent	Absent	Absent	Absent
chr12	4229849	4229995	-153006	Intergenic	CCND2	Present	Absent	Absent	Absent	Absent
chr12	4550792	4551000	3884	intron	FGF6	Present	Absent	Absent	Absent	Absent
chr12	5489028	5489573	-51974	Intergenic	NTF3	Present	Absent	Absent	Absent	Absent
chr12	6363078	6363299	53622	Intergenic	CD9	Present	Absent	Absent	Absent	Absent
chr12	8918754	8918992	-56344	intron	A2ML1	Present	Absent	Absent	Absent	Absent
chr12	12486428	12486583	16671	intron	MANSC1	Present	Absent	Absent	Absent	Absent
chr12	14094673	14094945	38481	intron	GRIN2B	Present	Absent	Absent	Absent	Absent
chr12	25097277	25097424	4685	intron	BCAT1	Present	Absent	Absent	Absent	Absent
chr12	25106405	25106579	-4457	Intergenic	BCAT1	Present	Absent	Absent	Absent	Absent
chr12	25535713	25535906	-131946	Intergenic	KRAS	Present	Absent	Absent	Absent	Absent
chr12	25746082	25746323	-39985	intron	LMNTD1	Present	Absent	Absent	Absent	Absent
chr12	27156716	27156895	10512	intron	TM7SF3	Present	Absent	Absent	Absent	Absent
chr12	29770067	29770240	-117527	intron	OVCH1	Present	Absent	Absent	Absent	Absent
chr12	32631243	32631447	-7561	intron	FGD4	Present	Absent	Absent	Absent	Absent
chr12	45809225	45809426	122852	intron	ANO6	Present	Absent	Absent	Absent	Absent
chr12	46041992	46042153	79632	Intergenic	LINC00938	Present	Absent	Absent	Absent	Absent
chr12	46503523	46503813	-119311	Intergenic	SCAF11	Present	Absent	Absent	Absent	Absent
chr12	49473669	49473815	-9980	Intergenic	RHEBL1	Present	Absent	Absent	Absent	Absent
chr12	51465592	51465744	11711	intron	CSRNP2	Present	Absent	Absent	Absent	Absent
chr12	55451323	55451534	37670	Intergenic	NEUROD4	Present	Absent	Absent	Absent	Absent
chr12	57666708	57666907	-21837	intron	STAC3	Present	Absent	Absent	Absent	Absent
chr12	59327153	59327375	-12945	Intergenic	LRIG3	Present	Absent	Absent	Absent	Absent
chr12	63310947	63311096	17909	intron	PPM1H	Present	Absent	Absent	Absent	Absent
chr12	64613903	64614125	2062	intron	C12orf66	Present	Absent	Absent	Absent	Absent
chr12	66633202	66633354	-11584	intron	MIR6502	Present	Absent	Absent	Absent	Absent
chr12	66636251	66636443	-8515	intron	MIR6502	Present	Absent	Absent	Absent	Absent
chr12	66997318	66997531	75432	intron	GRIP1	Present	Absent	Absent	Absent	Absent
chr12	66997904	66998148	74830	intron	GRIP1	Present	Absent	Absent	Absent	Absent
chr12	67935518	67935679	21736	intron	LINC02408	Present	Absent	Absent	Absent	Absent
chr12	68490794	68490957	62645	Intergenic	IFNG	Present	Absent	Absent	Absent	Absent
chr12	73402992	73403257	-149846	Intergenic	LINC02444	Present	Absent	Absent	Absent	Absent
chr12	73500159	73500416	-52683	Intergenic	LINC02444	Present	Absent	Absent	Absent	Absent
chr12	89433987	89434147	-20598	Intergenic	LINC02458	Present	Absent	Absent	Absent	Absent
chr12	89731785	89731963	14404	Intergenic	DUSP6	Present	Absent	Absent	Absent	Absent
chr12	92415497	92415736	119873	intron	LINC01619	Present	Absent	Absent	Absent	Absent
chr12	92976321	92976509	115960	Intergenic	LINC02397	Present	Absent	Absent	Absent	Absent
chr12	95008064	95008271	1610	intron	TMCC3	Present	Absent	Absent	Absent	Absent
chr12	96133758	96133931	50129	intron	NTN4	Present	Absent	Absent	Absent	Absent
chr12	105412554	105412739	32552	TTS	C12orf45	Present	Absent	Absent	Absent	Absent
chr12	115779406	115779614	-657530	Intergenic	TBX3	Present	Absent	Absent	Absent	Absent
chr12	117882642	117882845	-83136	Intergenic	NOS1	Present	Absent	Absent	Absent	Absent
chr12	117888009	117888385	-88590	Intergenic	NOS1	Present	Absent	Absent	Absent	Absent
chr12	117966391	117966538	-166857	intron	NOS1	Present	Absent	Absent	Absent	Absent
chr12	119127666	119127864	71719	Intergenic	LINC02423	Present	Absent	Absent	Absent	Absent
chr12	119205020	119205236	-5644	Intergenic	LINC02423	Present	Absent	Absent	Absent	Absent
chr12	122147967	122148261	-2544	Intergenic	TMEM120B	Present	Absent	Absent	Absent	Absent
chr12	124923272	124924035	-101865	intron	MIR6880	Present	Absent	Absent	Absent	Absent
chr12	125583301	125583512	33425	intron	AACS	Present	Absent	Absent	Absent	Absent
chr12	129612421	129612607	18279	intron	TMEM132D-AS1	Present	Absent	Absent	Absent	Absent
chr12	130015617	130015870	322597	exon	TMEM132D-AS2	Present	Absent	Absent	Absent	Absent
chr13	25063921	25064286	22813	intron	PARP4	Present	Absent	Absent	Absent	Absent
chr13	27597588	27597810	-101971	Intergenic	USP12-AS1	Present	Absent	Absent	Absent	Absent
chr13	27979629	27979980	-18952	Intergenic	GTF3A	Present	Absent	Absent	Absent	Absent
chr13	28408357	28408570	41843	intron	GSX1	Present	Absent	Absent	Absent	Absent
chr13	31348715	31348921	-28525	Intergenic	LINC00398	Present	Absent	Absent	Absent	Absent
chr13	31371294	31371458	-5967	Intergenic	LINC00398	Present	Absent	Absent	Absent	Absent
chr13	32608694	32608867	2869	intron	FRY	Present	Absent	Absent	Absent	Absent
chr13	33684950	33685159	75174	intron	STARD13	Present	Absent	Absent	Absent	Absent
chr13	35249902	35250126	-35192	Intergenic	LINC00457	Present	Absent	Absent	Absent	Absent
chr13	36338557	36338751	66790	Intergenic	LINC00445	Present	Absent	Absent	Absent	Absent
chr13	36728937	36729096	-22940	Intergenic	DCLK1	Present	Absent	Absent	Absent	Absent
chr13	37127782	37127928	-120302	Intergenic	SERTM1	Present	Absent	Absent	Absent	Absent
chr13	41016524	41016670	38546	intron	LINC00598	Present	Absent	Absent	Absent	Absent
chr13	43860096	43860246	-162817	intron	ENOX1-AS2	Present	Absent	Absent	Absent	Absent
chr13	46323365	46323553	46855	Intergenic	SPERT	Present	Absent	Absent	Absent	Absent
chr13	58361692	58361851	155893	Intergenic	PCDH17	Present	Absent	Absent	Absent	Absent
chr13	63618917	63619084	-237508	Intergenic	LINC00448	Present	Absent	Absent	Absent	Absent
chr13	68601558	68601704	655112	Intergenic	LINC00364	Present	Absent	Absent	Absent	Absent
chr13	93900970	93901125	21987	intron	GPC6	Present	Absent	Absent	Absent	Absent
chr13	97960360	97960511	85848	intron	MBNL2	Present	Absent	Absent	Absent	Absent
chr13	110782865	110783019	8893	Intergenic	LOC105370361	Present	Absent	Absent	Absent	Absent
chr13	114803844	114804038	39489	intron	RASA3	Present	Absent	Absent	Absent	Absent
chr14	21152166	21152399	-54	promoter-TSS	ANG	Present	Absent	Absent	Absent	Absent
chr14	23938968	23939114	129	intron	NGDN	Present	Absent	Absent	Absent	Absent
chr14	24610137	24610320	572	intron	EMC9	Present	Absent	Absent	Absent	Absent
chr14	25548041	25548187	-28611	Intergenic	STXBP6	Present	Absent	Absent	Absent	Absent
chr14	25696799	25696975	-177384	Intergenic	STXBP6	Present	Absent	Absent	Absent	Absent
chr14	25845319	25845508	-325910	Intergenic	STXBP6	Present	Absent	Absent	Absent	Absent
chr14	33194466	33194656	-213524	intron	NPAS3	Present	Absent	Absent	Absent	Absent
chr14	34513084	34513259	-92891	Intergenic	EGLN3	Present	Absent	Absent	Absent	Absent
chr14	39047551	39047697	-304175	Intergenic	LOC105370457	Present	Absent	Absent	Absent	Absent
chr14	39132134	39132290	-219587	Intergenic	LOC105370457	Present	Absent	Absent	Absent	Absent
chr14	42076397	42076563	421	non-coding	LRFN5	Present	Absent	Absent	Absent	Absent
chr14	43273515	43273718	1197557	Intergenic	LRFN5	Present	Absent	Absent	Absent	Absent
chr14	54066298	54066510	348798	Intergenic	MIR5580	Present	Absent	Absent	Absent	Absent
chr14	55134616	55134780	-86853	intron	SAMD4A	Present	Absent	Absent	Absent	Absent
chr14	57057440	57057715	11061	intron	TMEM260	Present	Absent	Absent	Absent	Absent
chr14	59574572	59574914	-80642	Intergenic	DAAM1	Present	Absent	Absent	Absent	Absent
chr14	59901515	59901661	30510	Intergenic	GPR135	Present	Absent	Absent	Absent	Absent
chr14	61614644	61615057	133206	Intergenic	TMEM30B	Present	Absent	Absent	Absent	Absent
chr14	61710907	61711053	37076	Intergenic	TMEM30B	Present	Absent	Absent	Absent	Absent
chr14	64701763	64701983	19201	intron	SYNE2	Present	Absent	Absent	Absent	Absent
chr14	67116321	67116590	142330	intron	GPHN	Present	Absent	Absent	Absent	Absent
chr14	68604474	68604839	314347	intron	RAD51B	Present	Absent	Absent	Absent	Absent
chr14	68762098	68762322	333294	intron	LOC100996664	Present	Absent	Absent	Absent	Absent
chr14	69121896	69122122	-26505	intron	LOC100996664	Present	Absent	Absent	Absent	Absent
chr14	70471948	70472129	27188	intron	SNORD169	Present	Absent	Absent	Absent	Absent
chr14	75508905	75509051	9192	intron	MLH3	Present	Absent	Absent	Absent	Absent
chr14	76112501	76112806	14566	intron	ERG28	Present	Absent	Absent	Absent	Absent
chr14	83122182	83122382	13306	intron	LINC02301	Present	Absent	Absent	Absent	Absent
chr14	85716812	85716958	-21391	Intergenic	SNORD3P3	Present	Absent	Absent	Absent	Absent
chr14	88461872	88462116	-1985	Intergenic	GALC	Present	Absent	Absent	Absent	Absent
chr14	92897906	92898077	-82134	intron	RIN3	Present	Absent	Absent	Absent	Absent
chr14	95588726	95588888	11033	intron	DICER1	Present	Absent	Absent	Absent	Absent
chr14	98305443	98305601	-76354	Intergenic	LINC02312	Present	Absent	Absent	Absent	Absent
chr14	98349679	98349943	94650	Intergenic	LINC01550	Present	Absent	Absent	Absent	Absent
chr14	99150880	99151127	-26947	Intergenic	C14orf177	Present	Absent	Absent	Absent	Absent
chr14	99156315	99156461	-21562	Intergenic	C14orf177	Present	Absent	Absent	Absent	Absent
chr14	99374423	99374714	196618	Intergenic	C14orf177	Present	Absent	Absent	Absent	Absent
chr14	101277423	101277760	-3237	Intergenic	MIR2392	Present	Absent	Absent	Absent	Absent
chr14	104346686	104346887	32728	Intergenic	LINC00637	Present	Absent	Absent	Absent	Absent
chr14	104616186	104616383	11224	intron	KIF26A	Present	Absent	Absent	Absent	Absent
chr15	20456904	20457127	-30982	Intergenic	CHEK2P2	Present	Absent	Absent	Absent	Absent
chr15	20851380	20851718	83875	Intergenic	GOLGA8CP	Present	Absent	Absent	Absent	Absent
chr15	20871091	20871278	90296	Intergenic	NBEAP1	Present	Absent	Absent	Absent	Absent
chr15	21926307	21926711	14230	Intergenic	LOC646214	Present	Absent	Absent	Absent	Absent
chr15	22040579	22040850	-8560	Intergenic	MIR3118-4	Present	Absent	Absent	Absent	Absent
chr15	22042621	22042775	-6576	Intergenic	MIR3118-4	Present	Absent	Absent	Absent	Absent
chr15	22386452	22386772	4230	Intergenic	OR4N4	Present	Absent	Absent	Absent	Absent
chr15	22441925	22442098	6870	Intergenic	IGHV1OR15-1	Present	Absent	Absent	Absent	Absent
chr15	22444407	22444593	4381	Intergenic	IGHV1OR15-1	Present	Absent	Absent	Absent	Absent
chr15	24750441	24750732	-52718	Intergenic	PWRN1	Present	Absent	Absent	Absent	Absent
chr15	25828081	25828291	-143983	Intergenic	UBE3A	Present	Absent	Absent	Absent	Absent
chr15	26020746	26020998	73100	intron	MIR4715	Present	Absent	Absent	Absent	Absent
chr15	28539822	28540049	27363	intron	HERC2	Present	Absent	Absent	Absent	Absent
chr15	29083622	29083793	10124	intron	GOLGA6L7	Present	Absent	Absent	Absent	Absent
chr15	31558285	31558489	-35322	Intergenic	LOC283710	Present	Absent	Absent	Absent	Absent
chr15	31762552	31762698	143587	Intergenic	KLF13	Present	Absent	Absent	Absent	Absent
chr15	31897726	31898029	264999	intron	OTUD7A	Present	Absent	Absent	Absent	Absent
chr15	33418223	33418395	-57934	intron	FMN1	Present	Absent	Absent	Absent	Absent
chr15	35998156	35998304	159834	intron	DPH6-DT	Present	Absent	Absent	Absent	Absent
chr15	38845352	38845553	11563	intron	RASGRP1	Present	Absent	Absent	Absent	Absent
chr15	39120170	39120369	131470	Intergenic		Present	Absent	Absent	Absent	Absent
chr15	39848871	39849109	-24290	Intergenic	THBS1	Present	Absent	Absent	Absent	Absent
chr15	42399749	42399911	-13070	Intergenic	PLA2G4D	Present	Absent	Absent	Absent	Absent
chr15	43894616	43894829	8690	intron	CKMT1B	Present	Absent	Absent	Absent	Absent
chr15	49090617	49090767	12574	intron	CEP152	Present	Absent	Absent	Absent	Absent
chr15	50168534	50168731	236944	non-coding	ATP8B4	Present	Absent	Absent	Absent	Absent
chr15	57404524	57404741	-106996	intron	TCF12	Present	Absent	Absent	Absent	Absent
chr15	58741213	58741382	17107	intron	LIPC	Present	Absent	Absent	Absent	Absent
chr15	59662648	59662822	2335	intron	MYO1E	Present	Absent	Absent	Absent	Absent
chr15	59740902	59741167	10649	intron	FAM81A	Present	Absent	Absent	Absent	Absent
chr15	66591178	66591381	5126	intron	DIS3L	Present	Absent	Absent	Absent	Absent
chr15	67266597	67266772	-17831	Intergenic	LINC02206	Present	Absent	Absent	Absent	Absent
chr15	68006800	68006947	-110974	intron	SKOR1	Present	Absent	Absent	Absent	Absent
chr15	69791801	69791959	46723	Intergenic	RPLP1	Present	Absent	Absent	Absent	Absent
chr15	70103218	70103389	-24270	Intergenic	LINC00593	Present	Absent	Absent	Absent	Absent
chr15	70678986	70679248	119150	Intergenic	LINC02205	Present	Absent	Absent	Absent	Absent
chr15	71567501	71567650	-86177	intron	THSD4-AS1	Present	Absent	Absent	Absent	Absent
chr15	72102663	72102843	-141	promoter-TSS	NR2E3	Present	Absent	Absent	Absent	Absent
chr15	74760824	74761036	7324	intron	UBL7-AS1	Present	Absent	Absent	Absent	Absent
chr15	75350801	75351114	15330	Intergenic	PPCDC	Present	Absent	Absent	Absent	Absent
chr15	86517212	86517389	-105551	Intergenic	AGBL1	Present	Absent	Absent	Absent	Absent
chr15	92699195	92699493	-237767	TTS	ST8SIA2	Present	Absent	Absent	Absent	Absent
chr15	92701811	92701976	-235218	intron	ST8SIA2	Present	Absent	Absent	Absent	Absent
chr15	92703967	92704170	-233043	intron	ST8SIA2	Present	Absent	Absent	Absent	Absent
chr15	92712624	92713072	-224263	intron	ST8SIA2	Present	Absent	Absent	Absent	Absent
chr15	92714086	92714335	-222901	intron	ST8SIA2	Present	Absent	Absent	Absent	Absent
chr15	92717367	92717513	-219671	Intergenic	ST8SIA2	Present	Absent	Absent	Absent	Absent
chr15	92718716	92718892	-218307	Intergenic	ST8SIA2	Present	Absent	Absent	Absent	Absent
chr15	92726805	92726971	-210223	Intergenic	ST8SIA2	Present	Absent	Absent	Absent	Absent
chr15	92727330	92727506	-209693	Intergenic	ST8SIA2	Present	Absent	Absent	Absent	Absent
chr15	92728301	92728447	-208737	Intergenic	ST8SIA2	Present	Absent	Absent	Absent	Absent
chr15	92731388	92731549	-205643	Intergenic	ST8SIA2	Present	Absent	Absent	Absent	Absent
chr15	92732871	92733260	-204046	Intergenic	ST8SIA2	Present	Absent	Absent	Absent	Absent
chr15	92733357	92733527	-203669	Intergenic	ST8SIA2	Present	Absent	Absent	Absent	Absent
chr15	92735908	92736096	-201109	Intergenic	ST8SIA2	Present	Absent	Absent	Absent	Absent
chr15	92740995	92741354	-195937	Intergenic	ST8SIA2	Present	Absent	Absent	Absent	Absent
chr15	92741980	92742193	-195025	Intergenic	ST8SIA2	Present	Absent	Absent	Absent	Absent
chr15	92748136	92748414	-188836	Intergenic	ST8SIA2	Present	Absent	Absent	Absent	Absent
chr15	92748542	92748945	-188368	Intergenic	ST8SIA2	Present	Absent	Absent	Absent	Absent
chr15	92750860	92751317	-186023	Intergenic	ST8SIA2	Present	Absent	Absent	Absent	Absent
chr15	92753645	92753876	-183351	Intergenic	ST8SIA2	Present	Absent	Absent	Absent	Absent
chr15	92757415	92757590	-179609	Intergenic	ST8SIA2	Present	Absent	Absent	Absent	Absent
chr15	92757954	92758156	-179056	Intergenic	ST8SIA2	Present	Absent	Absent	Absent	Absent
chr15	92764098	92764244	-172940	Intergenic	ST8SIA2	Present	Absent	Absent	Absent	Absent
chr15	92769460	92769616	-167573	Intergenic	ST8SIA2	Present	Absent	Absent	Absent	Absent
chr15	92775778	92775960	-161242	Intergenic	ST8SIA2	Present	Absent	Absent	Absent	Absent
chr15	92776308	92776726	-160594	Intergenic	ST8SIA2	Present	Absent	Absent	Absent	Absent
chr15	92786510	92786661	-150526	Intergenic	ST8SIA2	Present	Absent	Absent	Absent	Absent
chr15	92810803	92810957	-126231	Intergenic	ST8SIA2	Present	Absent	Absent	Absent	Absent
chr15	92815527	92815887	-121404	Intergenic	ST8SIA2	Present	Absent	Absent	Absent	Absent
chr15	92816607	92817288	-120164	Intergenic	ST8SIA2	Present	Absent	Absent	Absent	Absent
chr15	92821186	92821368	-115834	Intergenic	ST8SIA2	Present	Absent	Absent	Absent	Absent
chr15	92838141	92838417	-98832	Intergenic	ST8SIA2	Present	Absent	Absent	Absent	Absent
chr15	92841561	92841707	-95477	Intergenic	ST8SIA2	Present	Absent	Absent	Absent	Absent
chr15	92851714	92851906	-85301	Intergenic	ST8SIA2	Present	Absent	Absent	Absent	Absent
[truncated: 4,780 more rows]

## Sheet: Fig.4E
List of super-enhancers found in RH4 cells and their occupancy.
SE location			Annotation	# of ChIP-seq peaks
Chromosome	Start	End	Gene	HDAC2	RBBP4	CHD4	MTA2	PAX3-FOXO1
chr1	1500929	1510951	SSU72	3	4	0	3	1
chr1	2245595	2268570	RER1	4	5	0	0	0
chr1	6321345	6336550	ACOT7	3	7	0	3	0
chr1	6375877	6391640	ACOT7	4	5	0	3	0
chr1	7339012	7374544	CAMTA1	17	14	8	7	2
chr1	7390001	7403020	CAMTA1	7	6	2	3	1
chr1	8121264	8158329	ERRFI1	12	9	1	5	0
chr1	8172825	8204532	ERRFI1	3	4	3	2	1
chr1	10738919	10747487	CASZ1	3	5	0	2	0
chr1	15255871	15277406	TMEM51	9	10	0	1	0
chr1	16159609	16163047	SPEN	3	5	0	2	0
chr1	16263853	16292841	ZBTB17	5	11	0	3	0
chr1	16465601	16517055	EPHA2	16	23	2	6	0
chr1	17222918	17240357	.	3	3	0	2	0
chr1	19077397	19105740	ALDH4A1	7	4	2	1	0
chr1	19120658	19158107	ALDH4A1	23	20	7	0	0
chr1	19248533	19277268	ALDH4A1	10	8	8	3	0
chr1	20053452	20065603	.	5	3	3	3	1
chr1	20078785	20100165	.	15	15	14	9	1
chr1	22220377	22283294	HSPG2	15	23	4	4	1
chr1	23878588	23925630	ID3	22	17	19	9	1
chr1	24688595	24715157	RCAN3	10	5	2	4	2
chr1	25991983	26092224	MAN1C1	21	26	18	14	3
chr1	27728504	27773352	WASF2	10	8	6	12	1
chr1	27846015	27933761	AHDC1	24	35	3	6	0
chr1	29567522	29599255	PTPRU	7	7	2	2	0
chr1	30145554	30156160	PTPRU	2	2	5	3	1
chr1	31205247	31237367	SDC3	11	13	12	9	0
chr1	31348570	31404265	SDC3	16	12	12	9	1
chr1	31691503	31717429	NKAIN1	8	10	1	3	2
chr1	32218926	32254824	PEF1	8	14	1	6	2
chr1	32520550	32529156	KHDRBS1	3	3	0	3	0
chr1	32798035	32819855	MARCKSL1	6	11	0	1	0
chr1	33616959	33648814	TRIM62	7	8	7	7	1
chr1	33804115	33858791	PHC2	13	13	9	7	1
chr1	36602782	36653810	TRAPPC3	7	9	0	3	0
chr1	38455925	38481985	FHL3	9	9	2	2	0
chr1	39857473	39880160	MACF1	7	10	5	3	0
chr1	40097599	40116406	HEYL	14	16	7	3	0
chr1	40423574	40437238	MFSD2A	6	5	2	2	1
chr1	41822811	41921783	SCMH1	26	29	16	9	0
chr1	43388897	43429637	SLC2A1	8	11	2	2	0
chr1	48957508	48962326	SPATA6	2	4	1	1	0
chr1	59328751	59372266	JUN	18	11	9	12	1
chr1	59569775	59653456	FGGY	13	9	13	9	2
chr1	59874353	59919449	FGGY	18	10	9	11	2
chr1	60132253	60199736	FGGY	24	19	15	16	1
chr1	62751907	62853457	KANK4	29	27	6	20	1
chr1	68140498	68154814	GADD45A	3	6	0	3	1
chr1	77975733	77984394	ZZZ3	7	10	1	2	1
chr1	87614888	87696920	LMO4	26	17	14	16	2
chr1	91585928	91626661	ZNF644	12	6	4	7	1
chr1	94125666	94147813	BCAR3	14	15	5	7	2
chr1	94557291	94563343	ARHGAP29	3	3	5	2	1
chr1	108516383	108543852	VAV3	6	6	4	7	0
chr1	109815167	109843933	PSRC1	7	7	3	7	1
chr1	110033552	110079570	AMIGO1	12	12	2	10	2
chr1	112261539	112288808	FAM212B	9	14	6	7	2
chr1	112444324	112463668	KCND3	7	3	1	5	2
chr1	112850990	112885409	KCND3	12	13	0	4	0
chr1	116290971	116314620	CASQ2	12	5	3	6	1
chr1	117348508	117400692	PTGFRN	23	16	14	8	2
chr1	117420024	117425117	PTGFRN	3	4	3	3	1
chr1	117658087	117691669	TRIM45	8	11	5	7	1
chr1	118860141	118884608	TBX15	9	7	8	7	2
chr1	119026443	119048362	TBX15	9	8	6	8	1
chr1	119871383	119881021	WARS2	5	5	3	3	0
chr1	144986786	145016030	PDE4DIP	14	9	7	11	3
chr1	145448602	145460154	POLR3GL	3	8	1	3	0
chr1	150533569	150553166	MCL1	5	10	0	2	0
chr1	153522026	153551669	S100A2	3	6	0	2	0
chr1	154738940	154840110	KCNN3	26	29	9	13	4
chr1	155934914	155954613	ARHGEF2	10	15	2	5	1
chr1	156059453	156100581	LMNA	12	25	0	7	0
chr1	156629502	156647937	NES	11	13	2	6	3
chr1	160322503	160346529	NCSTN	3	3	1	3	1
chr1	161971094	161994332	OLFML2B	7	10	2	7	1
chr1	180885981	180901448	KIAA1614	10	10	3	7	1
chr1	181063581	181083064	IER5	10	10	6	6	1
chr1	182575760	182588474	RGS16	8	8	3	4	2
chr1	201237491	201305272	PKP1	7	7	2	7	1
chr1	201417045	201473241	CSRP1	10	14	0	5	0
chr1	201500102	201536741	CSRP1	9	9	7	3	0
chr1	201602554	201626269	NAV1	6	4	2	4	1
chr1	203006022	203062053	MYOG	14	22	2	7	1
chr1	204889777	204910943	TMEM81	9	7	0	3	3
chr1	208201922	208206283	PLXNA2	1	2	0	1	0
chr1	208263161	208286849	PLXNA2	3	5	1	4	0
chr1	208374180	208414411	PLXNA2	13	12	2	8	0
chr1	209327757	209335133	LAMB3	6	5	0	4	2
chr1	209698049	209739187	LAMB3	10	14	2	4	2
chr1	209814721	209826978	LAMB3	7	9	0	4	0
chr1	212651987	212707393	ATF3	10	12	2	10	1
chr1	212756242	212787153	ATF3	4	8	0	3	0
chr1	213118319	213156263	VASH2	12	13	1	9	2
chr1	214157457	214204982	PROX1	12	15	2	8	2
chr1	218543317	218577060	RRP15	7	7	0	5	0
chr1	223892566	223926814	CAPN2	10	13	4	3	0
chr1	225841080	225846807	ENAH	4	4	0	2	0
chr1	225954097	225960369	SRP9	3	4	0	2	0
chr1	226814121	226873843	ITPKB	12	11	3	6	1
chr1	226992773	227015855	ITPKB	5	7	1	3	1
chr1	230958108	231000296	C1orf198	12	10	0	7	0
chr1	231227598	231242538	FAM89A	1	1	0	1	0
chr1	234735399	234779148	IRF2BP2	9	13	0	10	1
chr1	235089421	235134681	IRF2BP2	13	14	8	12	0
chr10	5652748	5672371	ASB13	6	6	2	3	1
chr10	11051426	11077488	CELF2	5	7	2	5	1
chr10	13000695	13023588	CCDC3	3	4	4	5	1
chr10	24198980	24221141	KIAA1217	15	8	3	4	1
chr10	31063016	31074819	ZEB1	7	8	0	3	0
chr10	31095305	31123456	ZEB1	10	10	0	3	0
chr10	32028369	32049791	ARHGAP12	9	7	0	2	0
chr10	36159704	36188386	FZD8	4	4	7	5	1
chr10	72412625	72427510	ADAMTS14	7	6	11	6	2
chr10	79039169	79122818	KCNMA1	16	14	13	11	3
chr10	80861631	80920518	ZMIZ1	13	15	13	8	0
chr10	93097949	93116346	HECTD2	4	3	2	3	1
chr10	102638020	102668610	MRPL43	9	13	10	15	3
chr10	103051171	103065734	BTRC	5	7	1	4	1
chr10	103508750	103535446	FGF8	7	8	2	6	1
chr10	104020069	104042571	GBF1	4	4	9	6	3
chr10	104380019	104390997	SUFU	3	5	0	2	0
chr10	104408905	104439398	ARL3	9	10	2	5	0
chr10	104522507	104539650	WBP1L	5	4	1	3	1
chr10	108847449	108865542	SORCS1	4	3	0	5	1
chr10	112438967	112486715	RBM20	14	11	3	7	0
chr10	114714686	114727001	TCF7L2	10	8	7	5	1
chr10	114786078	114823206	TCF7L2	11	11	2	5	1
chr10	116088564	116157900	ABLIM1	15	18	3	7	2
chr10	120229532	120265217	FAM204A	4	5	2	5	1
chr10	120665211	120675576	NANOS1	5	5	2	3	1
chr10	126027001	126043872	OAT	4	3	0	3	0
chr10	126334792	126369670	FAM53B	3	3	1	2	0
chr10	126773931	126823077	CTBP2	4	8	0	3	0
chr10	128036443	128042192	DHX32	3	3	1	2	1
chr10	128945673	128971558	DOCK1	7	9	4	6	1
chr10	130094972	130118646	.	7	5	2	5	1
chr10	135426501	135434077	FRG2B	3	4	4	3	4
chr11	1971994	2011898	MRPL23	11	14	0	8	3
chr11	2721476	2728163	.	8	6	1	3	0
chr11	8709519	8743384	RPL27A	6	4	1	3	0
chr11	8828353	8863586	ST5	12	8	0	6	0
chr11	9586553	9592230	WEE1	1	2	0	4	0
chr11	9783561	9796439	WEE1	1	1	2	2	0
chr11	17665695	17677048	MYOD1	6	7	6	7	3
chr11	17700178	17752588	MYOD1	25	19	11	13	4
chr11	19863550	19892105	NAV2	5	4	3	7	0
chr11	20242331	20302002	NAV2	11	10	16	17	3
chr11	20323237	20365069	NAV2	9	9	7	10	1
chr11	27218007	27240787	CCDC34	9	7	5	5	0
chr11	30427831	30447479	MPPED2	3	2	3	6	2
chr11	36045321	36064124	LDLRAD3	7	7	2	4	2
chr11	44257364	44293138	EXT2	12	11	12	9	3
chr11	44610484	44650018	CD82	12	15	7	8	2
chr11	62305435	62324994	AHNAK	2	7	0	3	1
chr11	64621998	64644536	EHD1	7	8	0	3	0
chr11	65055975	65076594	POLA2	9	10	1	9	0
chr11	65243888	65268244	SCYL1	7	12	1	7	0
chr11	68084138	68122533	LRP5	7	5	0	2	0
chr11	68137390	68148661	LRP5	2	3	0	1	0
chr11	68161408	68209093	LRP5	10	13	1	6	0
chr11	69065073	69089693	ORAOV1	9	9	5	5	0
chr11	75039761	75070952	ARRB1	7	8	2	7	1
chr11	78791254	78832739	TENM4	7	7	5	7	0
chr11	112381499	112413413	PTS	9	7	2	6	1
chr11	112619164	112630307	NCAM1	8	7	0	3	0
chr11	119374844	119385152	.	8	6	0	3	0
chr11	119485893	119555760	.	25	22	2	10	2
chr11	121104810	121114908	.	7	6	0	4	1
chr11	125070824	125086775	PKNOX2	4	5	0	1	0
chr11	125125160	125157649	PKNOX2	10	6	1	3	0
chr11	125251641	125280745	PKNOX2	7	8	1	3	1
chr11	125967351	126020125	CDON	19	27	5	13	2
chr11	126176291	126191574	DCPS	5	3	0	3	0
chr11	126586768	126628136	ST3GAL4	4	5	0	4	0
chr11	128794016	128807707	.	5	7	0	3	1
chr11	130385133	130406484	ADAMTS15	9	6	1	2	1
chr11	130579575	130609233	SNX19	14	11	1	2	0
chr11	130630824	130712840	SNX19	9	10	0	3	0
chr11	131481784	131487894	.	5	5	0	1	0
chr11	131917374	131944282	.	8	9	0	0	0
chr12	810635	837039	WNK1	5	5	0	5	0
chr12	3139495	3144748	TEAD4	3	4	0	2	0
chr12	3206326	3268956	TSPAN9	17	17	7	10	0
chr12	4033441	4041831	CCND2	2	3	0	0	0
chr12	4218901	4246898	CCND2	11	10	9	9	1
chr12	6314121	6373357	CD9	6	7	4	14	1
chr12	14392224	14438433	ATF7IP	5	8	3	4	0
chr12	19521955	19565052	PLEKHA5	2	2	1	6	0
chr12	30258374	30283036	TMTC1	1	5	3	5	0
chr12	46544617	46558653	SLC38A1	6	5	11	6	1
chr12	49451904	49475677	RHEBL1	3	4	0	1	1
chr12	50200228	50205662	NCKAP5L	2	2	1	1	1
chr12	52566154	52583162	KRT80	8	7	3	4	0
chr12	54734833	54788495	COPZ1	10	16	0	9	0
chr12	57654292	57668487	R3HDM2	8	6	0	3	1
chr12	61265871	61267408	.	3	3	0	1	0
chr12	65377389	65416200	LEMD3	4	4	0	1	0
chr12	65884485	65932050	MSRB3	17	16	1	2	0
chr12	66196844	66222045	HMGA2	9	9	0	4	0
chr12	66274938	66302175	HMGA2	5	4	2	10	0
chr12	66324046	66363119	HMGA2	7	6	2	4	1
chr12	66625514	66639112	HELB	7	9	2	8	4
chr12	66990574	67046163	HELB	12	17	0	8	2
chr12	67751439	67760818	DYRK2	6	7	2	1	1
chr12	67803552	67852536	DYRK2	17	12	0	7	0
chr12	67965365	68001317	DYRK2	7	4	0	4	0
chr12	68038383	68055319	DYRK2	6	6	0	2	0
chr12	70273932	70299400	RAB3IP	17	13	11	6	1
chr12	70380841	70400380	CNOT2	6	4	3	6	1
chr12	71245750	71267192	KCNMB4	4	5	4	3	0
chr12	104386995	104422070	HCFC2	4	4	4	4	0
chr12	109003200	109064283	CORO1C	13	11	6	9	0
chr12	109165541	109198909	SSH1	7	10	1	8	0
chr12	109219288	109234832	SSH1	9	7	2	3	0
chr12	110362764	110390975	GIT2	9	9	4	6	0
chr12	119117986	119142620	SUDS3	8	3	1	7	2
chr12	120666863	120676565	PXN	2	2	0	3	0
chr12	123355438	123381079	VPS37B	11	9	0	7	0
chr12	123751214	123757538	CDK2AP1	4	6	0	1	0
chr12	124921738	125035440	NCOR2	31	39	3	10	1
chr12	125135147	125184231	NCOR2	17	12	3	7	0
chr12	125199746	125232048	SCARB1	15	10	14	7	1
chr12	129548035	129568220	SLC15A4	10	9	1	4	0
chr12	132098747	132110865	SFSWAP	8	8	0	2	0
chr13	22680690	22706121	.	7	4	5	2	0
chr13	24607556	24638225	SPATA13	5	4	1	3	1
chr13	27030673	27044066	WASF3	7	9	7	4	2
chr13	29274220	29329445	SLC46A3	6	13	5	10	0
chr13	30008350	30040315	MTUS2	9	7	16	10	3
chr13	31301638	31372984	ALOX5AP	29	18	22	17	3
chr13	31401316	31422702	ALOX5AP	6	6	6	4	2
chr13	31436437	31447372	ALOX5AP	9	8	9	4	1
chr13	33700009	33715890	STARD13	8	7	5	7	3
chr13	33757820	33810027	STARD13	8	4	4	9	1
chr13	34083840	34097436	STARD13	4	4	8	6	0
chr13	36334423	36366442	DCLK1	11	8	13	10	2
chr13	39664224	39683306	NHLRC3	8	6	9	12	0
chr13	40796272	40811078	FOXO1	4	5	5	5	1
chr13	43864696	43894580	DNAJC15	6	6	9	4	1
chr13	45477202	45507382	NUFIP1	8	5	2	5	1
chr13	52188075	52220613	WDFY2	3	5	8	8	0
chr13	53495740	53522713	SUGT1	4	6	4	4	0
chr13	79166737	79178103	POU4F1	0	3	2	1	0
chr14	23283512	23294435	SLC7A7	4	5	1	3	1
chr14	34497442	34530497	SPTSSA	6	14	7	3	1
chr14	34801051	34825945	SPTSSA	5	5	2	5	1
chr14	55094152	55151686	SAMD4A	12	10	0	6	1
chr14	61107724	61131518	SIX1	4	7	0	0	0
chr14	61567628	61624137	SLC38A6	19	17	2	9	1
chr14	61641300	61725897	SLC38A6	15	15	1	9	2
chr14	62004623	62078872	HIF1A	16	17	0	4	0
chr14	67112059	67120062	GPHN	2	2	0	2	1
chr14	68576244	68613196	RAD51B	7	9	2	7	1
chr14	68830355	68844676	RAD51B	10	8	0	6	0
chr14	68971826	68993755	RAD51B	11	9	2	5	0
chr14	69012837	69162021	RAD51B	45	44	18	20	2
chr14	69271679	69283458	ZFP36L1	3	4	6	4	1
chr14	74211227	74259460	ELMSAN1	17	17	1	6	0
chr14	75036144	75098039	ISCA2	13	15	0	0	0
chr14	75400952	75455906	PGF	11	14	3	5	0
chr14	77366738	77441879	IRF2BPL	16	19	2	10	0
chr14	77495252	77519374	IRF2BPL	18	19	1	8	0
chr14	77767630	77783663	POMT2	4	4	0	2	0
chr14	89891772	89902464	FOXN3	3	6	0	2	0
chr14	93452022	93523451	ITPK1	10	19	0	4	0
chr14	95937387	95983956	SYNE3	13	18	5	7	1
chr14	96712525	96741980	ATG2B	12	8	1	3	0
chr14	99147216	99184027	BCL11B	12	8	1	5	2
chr14	99372415	99381806	BCL11B	5	7	3	3	1
chr14	101139423	101160051	WDR25	3	3	0	0	0
chr15	35084297	35097302	ACTC1	8	5	10	6	1
chr15	40337761	40401783	BMF	21	20	9	12	2
chr15	50165847	50200915	ATP8B4	5	3	5	7	1
chr15	57828825	57850341	.	8	8	2	4	0
chr15	57939821	57959625	.	4	6	1	4	0
chr15	58729291	58813856	ADAM10	33	31	25	22	5
chr15	59735698	59746348	FAM81A	4	4	3	5	1
chr15	60662801	60700287	ANXA2	9	7	4	5	0
chr15	61075830	61098636	.	2	4	0	0	0
chr15	62741759	62755498	TLN2	4	5	0	2	0
chr15	62826796	62847129	TLN2	5	2	0	2	0
chr15	65693390	65716360	IGDCC4	6	10	0	4	0
chr15	67303672	67318459	SMAD3	7	6	5	3	0
chr15	71969390	72005853	THSD4	12	10	2	7	0
chr15	72519708	72530621	PKM	2	3	0	2	0
chr15	74199475	74244251	LOXL1	7	10	0	3	0
chr15	74513977	74544173	STRA6	7	9	0	1	0
chr15	78313847	78318891	TBC1D2B	2	3	1	2	1
chr15	78495753	78506250	IDH3A	5	4	4	3	0
chr15	82200395	82208933	MEX3B	6	5	1	3	1
chr15	82392629	82440039	MEX3B	7	7	1	4	0
chr15	93159695	93183032	FAM174B	12	11	35	13	20
chr15	93344794	93387987	CHD2	6	10	45	11	16
chr15	95828296	95847735	.	10	9	22	9	6
chr15	96872793	96884299	NR2F2	3	4	9	2	1
chr15	101246910	101280386	ASB7	9	11	5	2	1
chr15	101399305	101407383	ALDH1A3	3	5	1	1	1
chr15	101429265	101446320	ALDH1A3	2	6	5	5	1
chr15	101631388	101669169	CHSY1	9	9	11	8	2
chr15	101696398	101742351	CHSY1	17	14	10	7	1
chr15	101977212	101996905	PCSK6	8	9	3	4	0
chr16	960329	972541	LMF1	3	4	0	2	0
chr16	1021478	1036937	SOX8	3	7	1	5	0
chr16	1086188	1107550	SOX8	20	23	0	5	1
chr16	1470901	1483009	C16orf91	2	2	0	1	1
chr16	3988949	4004895	CREBBP	10	7	0	6	1
chr16	4048304	4069728	ADCY9	3	4	0	3	0
chr16	7380759	7414389	RBFOX1	11	7	1	7	1
chr16	8805871	8821418	ABAT	7	11	5	6	2
chr16	11178613	11204343	CLEC16A	9	9	0	4	0
chr16	16081499	16119973	ABCC1	6	11	0	4	0
chr16	27228297	27263704	NSMCE1	6	5	2	5	0
chr16	27329872	27356740	IL4R	4	3	3	3	1
chr16	27723581	27736870	KIAA0556	6	4	2	5	0
chr16	67427536	67441455	TPPP3	2	4	0	2	0
chr16	68819833	68828367	TANGO6	6	6	1	4	2
chr16	70720266	70770610	VAC14	11	14	7	11	0
chr16	79668460	79693560	MAF	11	10	10	4	1
chr16	82664834	82695359	CDH13	7	7	8	7	0
chr16	83737909	83766080	CDH13	6	5	8	3	1
chr16	86523886	86566655	FOXF1	3	9	3	8	2
chr16	86962129	87005642	MTHFSD	12	12	5	3	0
chr17	5977570	6002364	WSCD1	10	11	1	5	1
chr17	6438216	6461944	PITPNM3	2	4	1	3	2
chr17	9099235	9121946	STX8	7	9	3	4	1
chr17	11388441	11399685	.	9	6	0	2	0
chr17	11461263	11471847	.	1	1	0	2	0
chr17	15301322	15319080	PMP22	8	9	3	4	1
chr17	15333502	15340735	TVP23C	9	6	8	3	3
chr17	17287526	17327110	MED9	9	11	8	4	1
chr17	19624239	19632748	ALDH3A2	1	3	1	1	0
chr17	20156708	20171415	SPECC1	3	10	4	6	0
chr17	27278831	27310888	PHF12	8	10	6	9	2
chr17	27363673	27446431	PIPOX	18	22	23	21	7
chr17	27466823	27495907	MYO18A	7	9	1	5	0
chr17	36880612	36919323	PSMB3	5	12	0	1	0
chr17	38459471	38508985	RARA	20	29	4	7	1
chr17	38698440	38714550	SMARCE1	8	10	4	4	0
chr17	41728957	41747548	MEOX1	8	10	19	9	1
chr17	42171107	42188540	HDAC5	5	7	4	3	2
chr17	42679301	42687561	FZD2	3	3	4	3	2
chr17	43107885	43130136	DCAKD	6	7	5	4	0
chr17	43340459	43372167	MAP3K14	8	10	3	6	0
chr17	46064351	46081738	CDK5RAP3	3	5	2	2	0
chr17	47621722	47633711	SPOP	2	6	0	0	0
chr17	47799454	47807942	SLC35B1	2	3	0	2	0
chr17	48225047	48259811	SGCA	7	10	0	1	0
chr17	49025410	49033351	TOB1	6	6	0	2	0
chr17	54675064	54683182	NOG	5	7	2	4	1
chr17	55514757	55538982	MSI2	6	9	0	2	0
chr17	55593978	55636266	MSI2	15	20	0	6	1
chr17	55737499	55742772	MSI2	1	3	0	2	0
chr17	55944805	56026816	CUEDC1	25	20	0	7	0
chr17	62051932	62067227	.	4	5	0	0	0
chr17	63292927	63322008	AXIN2	9	8	0	4	1
chr17	64455255	64465463	PRKCA	9	7	0	3	0
chr17	64604758	64616698	PRKCA	7	5	1	2	0
chr17	66505249	66511666	PRKAR1A	5	4	0	2	0
chr17	70129862	70184236	SOX9	12	10	0	2	0
chr17	71591424	71623233	SDK2	7	7	0	1	1
chr17	74667144	74707644	MXRA7	9	14	3	7	0
chr17	75368387	75441353	.	19	30	3	14	0
chr17	76310573	76372087	PGS1	10	18	2	9	1
chr17	76539855	76561214	PGS1	6	9	0	5	1
chr17	76858246	76892475	TIMP2	9	11	1	4	0
chr17	77025746	77050352	C1QTNF1	5	8	0	3	2
chr17	77995529	78005724	TBC1D16	8	8	3	4	0
chr17	78759241	78807639	RPTOR	10	15	4	6	0
chr17	78932969	78953600	RPTOR	2	9	0	1	0
chr17	79259703	79324471	SLC38A10	10	21	0	5	0
chr17	79354187	79404144	BAHCC1	16	29	0	7	0
chr17	80843915	80861157	TBCD	3	7	0	6	1
chr18	3400965	3420089	TGIF1	7	7	0	3	0
chr18	3437906	3459542	TGIF1	8	6	0	2	0
chr18	3501486	3549030	TGIF1	8	6	2	7	0
chr18	3598909	3625549	TGIF1	8	9	0	5	0
chr18	6722364	6766654	.	19	14	0	0	0
chr18	10912539	10936985	.	6	6	0	3	0
chr18	20666549	20724839	CABLES1	11	15	0	7	0
chr18	20803643	20841161	CABLES1	17	19	8	11	3
chr18	23306295	23324031	ZNF521	3	2	3	5	1
chr18	29884611	29907862	RNF138	2	2	0	4	0
chr18	42294481	42323971	SETBP1	9	6	4	4	0
chr18	60835157	60852386	BCL2	8	8	1	3	1
chr18	77218083	77252311	NFATC1	6	6	0	3	0
chr19	2774123	2794042	SGTA	7	4	1	4	0
chr19	13163831	13190881	NFIX	6	9	0	1	0
chr19	13948035	13977227	C19orf53	14	12	6	4	1
chr19	19562304	19601280	GATAD2A	3	6	0	3	0
chr19	31138597	31156828	ZNF536	7	8	14	8	3
chr19	31586648	31653165	TSHZ3	9	14	10	6	1
chr19	31704407	31717108	TSHZ3	4	4	14	3	1
chr19	31741880	31755595	TSHZ3	13	10	10	9	3
chr19	34213102	34223718	CHST8	10	9	7	6	4
chr19	39142993	39185084	ACTN4	4	7	0	4	0
chr19	39352743	39385513	SIRT2	12	9	3	6	1
chr19	40842576	40867126	PLD3	3	4	0	2	0
chr19	40926785	40951116	SERTAD3	8	8	0	0	0
chr19	42733365	42784623	GSK3A	6	17	0	2	0
chr19	46272941	46297227	DMPK	3	5	1	0	0
chr19	46970547	46985895	PNMAL1	0	1	0	1	0
chr19	49151633	49161401	CA11	4	3	0	2	1
chr19	50317575	50332595	MED25	1	3	0	0	0
chr19	50670168	50684409	MYH14	8	7	3	3	1
chr19	50991879	51015146	JOSD2	7	9	0	4	3
chr19	56006914	56050363	NAT14	10	11	0	3	0
chr19	56622766	56644170	ZNF787	2	3	0	1	0
chr19	57386221	57429678	ZIM2	9	8	1	5	2
chr19	57563573	57580439	ZNF264	4	2	4	1	1
chr2	1653637	1664018	PXDN	4	3	1	1	1
chr2	1685525	1748966	PXDN	22	26	13	18	2
chr2	1775968	1810966	MYT1L	15	7	5	8	1
chr2	10545306	10555779	HPCAL1	6	7	7	3	1
chr2	15868365	15887976	DDX1	12	7	3	2	1
chr2	16121810	16192309	MYCN	13	12	10	10	4
chr2	16378207	16409396	MYCN	14	18	11	8	3
chr2	16787896	16834654	FAM49A	12	14	10	15	0
chr2	17972296	17995244	KCNS3	7	11	6	8	0
chr2	18226421	18255537	KCNS3	4	5	9	3	2
chr2	20597984	20638366	RHOB	6	5	2	7	0
chr2	20742665	20834374	HS1BP3	21	30	17	21	4
chr2	23740978	23768825	KLHL29	8	10	4	7	1
chr2	23785342	23825454	KLHL29	10	10	4	9	2
chr2	24630145	24635771	ITSN2	6	6	1	4	1
chr2	25500991	25547049	DNMT3A	13	15	3	7	1
chr2	28557134	28602013	BRE	10	11	6	8	0
chr2	29873527	29885178	CLIP4	5	4	2	4	1
chr2	37850066	37884532	CDC42EP3	10	8	3	5	1
chr2	37994517	38030976	CDC42EP3	19	13	9	8	2
chr2	41946302	41964578	.	4	3	2	5	1
chr2	42097021	42109417	PKDCC	5	4	3	3	0
chr2	42153772	42165591	PKDCC	9	8	9	3	1
chr2	42251833	42259654	PKDCC	4	3	3	0	1
chr2	43011829	43038924	MTA3	5	7	6	5	1
chr2	43297891	43315579	ZFP36L2	8	10	2	3	0
chr2	43540622	43587083	THADA	8	6	5	6	0
chr2	45463261	45507886	SIX2	16	16	14	7	0
chr2	46557215	46565054	RHOQ	8	7	0	2	1
chr2	47082573	47106566	MCFD2	8	8	2	4	0
chr2	47259174	47305012	MCFD2	8	9	5	5	0
chr2	60585275	60599404	BCL11A	8	8	4	3	2
chr2	60742802	60781858	BCL11A	4	9	1	5	0
chr2	68994665	69007045	APLF	2	2	1	2	1
chr2	69024884	69059877	APLF	12	11	10	8	2
chr2	69366257	69452814	ANTXR1	23	19	4	6	1
chr2	70317742	70370850	PCBP1	11	12	0	4	0
chr2	76698597	76707495	GCFC2	3	3	2	2	0
chr2	85389374	85409144	TGOLN2	6	5	1	1	2
chr2	85475841	85507373	TGOLN2	14	12	2	2	1
chr2	85729972	85734914	MAT2A	2	1	2	2	1
chr2	85956393	86051478	ATOH8	43	46	5	12	1
chr2	86180047	86186845	ST3GAL5	6	2	3	1	0
chr2	111592284	111617582	RGPD5	9	9	0	5	0
chr2	120451621	120476645	TMEM177	3	4	1	3	1
chr2	121520776	121545954	.	3	4	1	1	0
chr2	136755239	136844632	DARS	36	33	59	33	13
chr2	136977409	137016204	DARS	8	13	12	15	3
chr2	137084643	137092834	DARS	5	5	7	3	1
chr2	137132963	137162695	DARS	7	9	14	7	2
chr2	145265723	145282485	ZEB2	8	11	2	4	0
chr2	174436229	174455439	CDCA7	5	2	3	5	1
chr2	178026764	178053675	HNRNPA3	13	14	6	8	1
chr2	200885325	200955084	TYW5	13	10	10	14	0
chr2	200995639	201050033	SPATS2L	10	7	4	13	2
chr2	201137803	201143910	SPATS2L	5	4	3	1	0
chr2	201163388	201185425	SPATS2L	3	5	0	7	0
chr2	204647187	204680954	RAPH1	11	9	1	3	1
chr2	206793709	206812655	NRP2	6	3	5	4	1
chr2	216385529	216406151	FN1	3	4	0	4	0
chr2	218482692	218510481	IGFBP5	6	5	1	5	2
chr2	219949163	219953299	NHEJ1	2	3	1	2	1
chr2	222988522	223009922	PAX3	7	4	2	4	1
chr2	223304852	223325440	PAX3	8	6	4	6	1
chr2	223598184	223622943	ACSL3	9	9	2	5	1
chr2	227275453	227314701	IRS1	9	5	2	7	0
chr2	236543486	236575341	AGAP1	3	3	1	2	0
chr2	238188382	238234562	LRRFIP1	11	4	2	7	0
chr2	238512175	238539319	LRRFIP1	8	10	1	6	0
chr2	238568929	238611182	LRRFIP1	10	6	1	2	1
chr2	241175545	241191186	GPC1	8	7	0	8	0
chr2	241302826	241327680	GPC1	6	6	0	2	0
chr20	1396918	1437023	NSFL1C	6	3	11	5	2
chr20	2580543	2608336	NOP56	7	10	6	4	0
chr20	3776412	3793296	CDC25B	6	7	1	3	0
chr20	19569598	19612812	SLC24A3	13	9	8	6	2
chr20	19787077	19810653	RIN2	9	11	9	5	1
chr20	19945113	19984206	RIN2	9	10	6	8	0
chr20	22320091	22366244	NXT1	12	10	1	7	0
chr20	22384426	22413774	NXT1	7	2	4	5	2
chr20	22770538	22792473	NXT1	11	12	2	2	0
chr20	22896893	22907364	NXT1	8	7	5	5	0
chr20	23080718	23140629	NXT1	11	16	4	7	0
chr20	24586442	24654271	SYNDIG1	14	19	5	9	2
chr20	25012306	25035029	APMAP	10	7	0	2	0
chr20	30124253	30161855	HM13	8	9	6	5	0
chr20	30262777	30311789	BCL2L1	17	17	11	10	1
chr20	32608845	32627256	RALY	8	5	5	3	0
chr20	33100465	33115773	DYNLRB1	3	4	1	3	0
chr20	35450307	35485114	SOGA1	6	13	1	4	1
chr20	36505825	36512215	TTI1	6	5	7	4	1
chr20	36899351	36916617	RALGAPB	3	4	3	3	2
chr20	40617387	40636110	.	7	5	15	11	3
chr20	42799691	42817726	JPH2	7	7	9	5	1
chr20	44545975	44578159	PCIF1	12	14	3	4	0
chr20	45416284	45444212	EYA2	22	18	9	9	4
chr20	45582134	45637508	EYA2	17	11	17	18	6
chr20	45688377	45695804	EYA2	3	2	3	3	2
chr20	46394941	46439192	SULF2	13	12	4	7	1
chr20	46471254	46490359	SULF2	5	11	1	7	3
chr20	46534522	46560483	SULF2	11	11	10	11	2
chr20	46578745	46588636	SULF2	5	5	3	3	0
chr20	46903273	46949171	SULF2	31	23	16	17	7
chr20	47009295	47040807	PREX1	5	5	3	5	2
chr20	47078196	47100555	PREX1	9	8	4	7	2
chr20	47276023	47356310	PREX1	25	19	17	15	2
chr20	47393124	47417252	PREX1	11	7	10	5	1
chr20	47844961	47863125	DDX27	6	5	0	1	1
chr20	47954431	47964780	B4GALT5	7	8	2	1	0
chr20	48165983	48223118	B4GALT5	24	14	8	11	2
chr20	48753712	48785826	TMEM189	7	11	0	2	0
chr20	49244412	49272945	PARD6B	6	8	0	3	0
chr20	52225229	52240317	ZNF217	5	6	0	4	0
chr20	52350528	52368235	ZNF217	11	11	3	9	2
chr20	52482468	52534513	ZNF217	13	10	4	11	1
chr20	52745118	52761128	.	6	8	0	3	0
chr20	54997179	55019855	RTFDC1	9	5	3	4	0
chr20	55727994	55746724	BMP7	3	2	1	3	1
chr20	56007690	56017018	RBM38	5	5	1	3	0
chr20	56562006	56595400	PMEPA1	2	4	1	2	0
chr20	56644335	56689730	PMEPA1	13	14	13	7	2
chr20	57193899	57212697	STX16	4	7	2	3	1
chr20	57880823	57919129	ATP5E	18	18	6	4	2
chr20	57935392	57988575	ATP5E	16	15	1	4	0
chr20	58584585	58590393	PPP1R3D	5	4	3	3	1
chr20	58968799	58983667	PPP1R3D	6	5	14	3	1
chr20	59081148	59117680	PPP1R3D	19	14	16	6	2
chr20	59954016	59964334	CDH4	9	8	2	1	1
chr20	60112329	60115948	CDH4	1	1	1	1	1
chr21	28212704	28231305	ADAMTS1	8	8	5	4	1
chr21	28315632	28335069	ADAMTS5	3	6	9	5	1
chr21	34407755	34437246	OLIG2	4	6	16	11	4
chr21	41014259	41049011	SH3BGR	7	12	13	5	0
chr21	41221073	41226160	SH3BGR	2	1	1	2	1
chr21	44568194	44583874	U2AF1	4	7	1	3	1
chr21	44888837	44938656	SIK1	6	7	3	7	1
chr21	46713987	46754413	POFUT2	8	14	0	2	0
chr22	17737258	17749722	CECR5	8	8	4	6	0
chr22	18367417	18407165	MICAL3	10	11	0	3	0
chr22	19842553	19901241	TXNRD2	8	13	1	4	0
chr22	22279762	22297727	PPM1F	2	4	0	2	0
chr22	23449524	23457769	GNAZ	3	5	2	4	0
chr22	23862036	23881949	ZNF70	4	5	1	2	0
chr22	25509763	25557603	CRYBB2	7	10	6	3	1
chr22	26064582	26097818	ADRBK2	7	7	5	7	0
chr22	26132377	26157342	MYO18B	10	6	3	4	1
chr22	27280501	27295777	MN1	10	7	8	5	2
chr22	27810822	27879523	MN1	24	21	15	12	4
chr22	27999362	28051611	MN1	23	18	18	8	1
chr22	28168469	28191535	MN1	11	11	9	5	1
chr22	28488321	28513135	TTC28	3	4	1	4	0
chr22	29473288	29548854	KREMEN1	20	18	7	9	1
chr22	30083013	30111815	NF2	5	10	2	5	0
chr22	30591420	30606961	GATSL3	8	7	4	3	0
chr22	34062284	34107575	LARGE	8	7	1	5	0
chr22	36723253	36769410	MYH9	12	10	2	4	1
chr22	36815269	36864201	TXN2	8	13	1	7	1
chr22	39567381	39582399	RPL3	8	8	0	3	0
chr22	41105248	41131255	MKL1	4	5	1	4	0
chr22	43685925	43706006	SCUBE1	6	7	3	4	1
chr22	46390989	46410410	PPARA	11	14	5	5	0
chr22	46462598	46478072	PPARA	2	7	0	1	0
chr3	8523736	8552111	LMCD1	26	21	23	16	6
chr3	8617069	8653098	LMCD1	14	14	15	14	7
chr3	8750336	8785506	CAV3	13	14	9	9	4
chr3	8973076	9006985	RAD18	8	9	3	11	0
chr3	11609289	11658067	VGLL4	12	13	15	10	4
chr3	12699729	12716149	RAF1	2	3	0	1	0
chr3	15672198	15691202	BTD	14	13	9	8	1
chr3	42066247	42114261	TRAK1	7	8	0	5	0
chr3	45641010	45658129	LIMD1	7	8	1	5	1
chr3	49481707	49501377	DAG1	4	5	0	2	0
chr3	54279434	54296466	.	0	0	0	2	0
chr3	57039356	57085042	IL17RD	6	5	3	4	1
chr3	57145365	57195180	IL17RD	8	5	5	7	1
chr3	58545749	58569590	FAM107A	10	9	4	4	1
chr3	58663878	58675496	FAM107A	9	5	5	4	0
chr3	64045244	64075219	PSMD6	3	2	8	7	1
chr3	66633604	66679884	LRIG1	14	10	7	9	1
chr3	66741976	66746807	LRIG1	3	3	4	1	1
chr3	73475668	73503646	PDZRN3	14	12	12	7	3
chr3	79665045	79671919	ROBO1	1	1	2	2	1
chr3	87014581	87042911	VGLL3	10	10	10	18	1
chr3	106529251	106548366	CBLB	4	4	5	6	1
chr3	111455659	111487905	PHLDB2	3	3	4	8	0
chr3	111554416	111589160	PHLDB2	6	9	4	5	0
chr3	112967630	112996209	SPICE1	8	7	4	9	0
chr3	124478060	124538258	ITGB5	14	14	9	14	0
chr3	127453365	127474467	MGLL	8	9	6	5	2
chr3	136468049	136473001	STAG1	3	2	0	2	0
chr3	136501773	136510278	SLC35G2	8	5	3	5	2
chr3	139477085	139506980	RBP1	6	7	0	0	0
chr3	140786362	140835370	SPSB4	13	16	16	14	4
chr3	149779006	149801796	PFN2	11	8	24	12	4
chr3	149920140	149973626	PFN2	24	17	36	26	4
chr3	150011209	150037937	TSC22D2	5	5	16	19	2
chr3	174042796	174062444	NLGN1	2	1	11	14	1
chr3	177051528	177081033	TBL1XR1	12	15	6	9	1
chr3	177167211	177213857	TBL1XR1	13	10	8	12	1
chr3	183502605	183531492	YEATS2	3	1	0	1	0
chr3	184374189	184412249	MAGEF1	11	10	11	9	2
chr3	185808517	185844941	ETV5	5	5	14	10	2
chr3	192542785	192607489	MB21D2	8	11	9	9	2
chr3	193532175	193550081	OPA1	10	11	5	5	1
chr4	3823873	3838306	ADRA2C	2	5	0	3	1
chr4	5028859	5044575	EVC2	5	3	4	3	0
chr4	6962856	6967688	TBC1D14	2	4	0	0	0
chr4	7805637	7846451	AFAP1	12	10	8	7	0
chr4	7892546	7913432	AFAP1	8	7	9	7	0
chr4	8385111	8404825	ACOX3	6	9	5	4	3
chr4	8503274	8548869	TRMT44	7	11	1	1	0
chr4	10002075	10057293	.	10	10	2	4	0
chr4	10173830	10209943	WDR1	10	7	6	5	2
chr4	25785649	25799162	SEL1L3	6	5	2	4	1
chr4	41135309	41157086	APBB2	10	8	6	9	0
chr4	53731464	53740892	SCFD2	3	7	1	3	0
chr4	55646424	55651755	KIT	4	4	1	2	1
chr4	77890156	77945051	CCNI	12	9	11	6	0
chr4	78090635	78124713	CCNG2	6	5	8	6	1
chr4	111542793	111559334	PITX2	3	5	0	3	0
chr4	124748232	124816723	.	12	13	24	21	2
chr4	154441098	154486301	KIAA0922	6	9	3	9	1
chr4	156879512	156896830	PDGFC	0	0	0	3	0
chr4	169702396	169781931	PALLD	7	7	0	2	0
chr4	186480462	186500052	PDLIM3	6	6	0	2	0
chr5	395088	412242	EXOC3	4	1	1	3	0
chr5	3302307	3325968	IRX2	5	6	0	1	1
chr5	14028666	14042297	TRIO	11	11	4	3	1
chr5	15783091	15807593	FBXL7	2	6	0	6	2
chr5	54873269	54903885	SLC38A9	11	5	5	9	2
chr5	71659150	71684932	PTCD2	9	6	7	6	1
chr5	71746408	71759535	PTCD2	3	3	2	2	1
chr5	73920378	73945081	ENC1	10	5	10	12	2
chr5	77280091	77300282	AP3B1	8	3	2	4	2
chr5	77799976	77816741	LHFPL2	9	7	2	5	1
chr5	80476794	80488492	ZCCHC9	5	5	5	3	0
chr5	106889018	106941877	EFNA5	15	13	4	15	1
chr5	139031834	139090885	CXXC5	12	18	2	2	0
chr5	140872937	140905723	DIAPH1	12	13	3	5	1
chr5	142420168	142466691	ARHGAP26	7	7	8	10	1
chr5	142506931	142516569	ARHGAP26	6	5	6	6	1
chr5	151061645	151088089	SPARC	15	11	3	8	0
chr5	157034407	157045739	ADAM19	3	2	4	1	1
chr5	159783262	159807645	C1QTNF2	6	6	1	3	0
chr5	169997985	170025831	SPDL1	4	5	0	2	1
chr5	172718816	172753067	STC2	13	12	13	9	4
chr5	172879219	172905047	STC2	15	11	23	9	3
chr5	172919975	172939932	BOD1	9	5	10	8	3
chr5	173849559	173876870	MSX2	6	6	15	7	3
chr5	176521441	176537143	FGFR4	9	11	6	4	2
chr6	3796071	3832862	PXDC1	6	8	0	2	0
chr6	4344325	4375692	ECI2	5	5	2	4	1
chr6	4389046	4413573	ECI2	5	4	6	7	1
chr6	4605977	4614364	CDYL	6	4	1	4	1
chr6	15249091	15269450	JARID2	7	5	0	3	0
chr6	37069039	37113107	PIM1	8	7	7	8	1
chr6	41602607	41632161	MDFI	4	11	5	2	0
chr6	41974954	42000252	CCND3	9	8	14	6	4
chr6	44167529	44171954	SLC29A1	3	3	5	3	1
chr6	44619348	44640976	CDC5L	12	14	11	10	3
chr6	52401559	52437696	TRAM2	6	6	9	7	2
chr6	70821655	70876302	LMBRD1	8	9	25	17	1
chr6	89998024	90009901	UBE2J1	4	5	2	3	1
chr6	105608475	105628394	POPDC3	5	5	2	8	1
chr6	111844331	111897920	REV3L	12	8	1	8	1
chr6	114316892	114340437	HDAC2	4	3	2	4	1
chr6	138167583	138196496	TNFAIP3	14	9	10	9	0
chr6	147126327	147141880	STXBP5	6	4	3	4	2
chr6	148822138	148859885	SASH1	5	5	2	3	1
chr6	149268788	149295390	UST	9	9	3	10	3
chr6	154769109	154804720	CNKSR3	12	9	2	7	0
chr6	158132036	158148808	SNX9	16	8	8	5	2
chr6	158428951	158463886	SNX9	8	14	4	8	2
chr6	164185497	164212024	QKI	13	11	14	13	3
chr6	164505192	164531040	QKI	12	8	11	8	3
chr6	169541248	169591537	.	19	21	9	16	2
chr6	170541463	170575966	.	4	6	0	4	1
chr7	495293	513685	.	6	5	0	3	0
chr7	601062	631209	PRKAR1B	9	11	0	4	0
chr7	2532556	2539474	LFNG	6	7	1	3	1
chr7	5463800	5470502	TNRC18	4	9	1	0	0
chr7	5635868	5711792	FSCN1	9	15	1	9	2
chr7	23506988	23514809	IGF2BP3	5	6	0	3	0
chr7	24364099	24422027	MPP6	13	11	7	9	2
chr7	25806410	25846446	.	3	5	2	8	2
chr7	30182041	30217192	ZNRF2	15	12	5	8	1
chr7	37066642	37083492	ELMO1	4	6	9	5	2
chr7	37241092	37260867	ELMO1	8	5	2	5	0
chr7	37348136	37364482	ELMO1	7	7	5	9	2
chr7	37382644	37402635	ELMO1	7	6	9	7	1
chr7	42730485	42764740	C7orf25	4	4	0	0	0
chr7	44662550	44680522	OGDH	8	6	0	0	0
chr7	44794919	44809864	ZMIZ2	1	2	0	1	0
chr7	44925222	44937732	PURB	4	4	3	4	1
chr7	47217532	47225307	.	1	5	0	1	0
chr7	47490122	47498428	TNS3	4	5	1	1	0
chr7	51322229	51328803	COBL	5	2	0	1	0
chr7	69238486	69290551	AUTS2	14	12	5	12	1
chr7	73423865	73456011	LIMK1	7	11	2	1	0
chr7	73918615	73927563	GTF2IRD1	3	2	0	2	0
chr7	75594215	75608196	POR	3	3	0	5	2
chr7	75920582	75948400	HSPB1	9	10	3	7	0
chr7	77068962	77085350	PTPN12	5	5	3	4	1
chr7	92090382	92114261	GATAD1	1	3	0	3	1
chr7	92238302	92292270	CDK6	10	12	6	16	0
chr7	92308076	92424052	CDK6	21	18	8	12	2
chr7	92641332	92652396	CDK6	4	2	0	2	0
chr7	95099825	95108559	PON2	8	6	5	4	4
chr7	98180528	98201684	NPTX2	18	9	2	6	2
chr7	101754608	101766255	CUX1	8	5	0	2	0
chr7	101894795	101904283	CUX1	2	1	2	3	1
chr7	105091156	105098545	PUS7	1	0	0	2	0
chr7	105398822	105418280	SYPL1	6	6	3	4	1
chr7	116370207	116392857	MET	4	3	0	6	1
chr7	129910738	129920112	CPA5	8	9	4	7	0
chr7	129989693	130034137	CEP41	19	18	10	11	6
chr7	130069463	130096816	CEP41	6	6	1	3	0
chr7	131288732	131318833	PODXL	12	14	0	8	1
chr7	131507357	131528990	PODXL	3	3	1	4	1
chr7	150940223	150950281	SMARCD3	3	4	2	2	0
chr7	151491919	151527720	PRKAG2	8	7	2	6	2
chr7	157188058	157192686	DNAJB6	2	2	0	1	1
chr7	158988431	159019839	VIPR2	1	2	0	1	1
chr8	551662	565635	ERICH1	7	7	6	7	2
chr8	18938757	18956095	PSD3	7	7	2	1	1
chr8	23154425	23224275	LOXL2	17	17	4	11	2
chr8	26306468	26336682	PNMA2	8	8	0	4	0
chr8	29609889	29679976	LEPROTL1	14	20	13	10	2
chr8	33166822	33186589	FUT10	3	3	1	3	1
chr8	38286521	38308216	FGFR1	7	8	0	5	0
chr8	41511054	41524831	ANK1	2	3	0	1	0
chr8	42050405	42073174	PLAT	9	10	2	5	0
chr8	49490755	49503404	SNAI2	4	6	1	2	1
chr8	59155873	59198566	UBXN2B	15	7	9	12	0
chr8	59696488	59719138	NSMAF	10	9	6	5	1
chr8	61756403	61788820	CHD7	6	7	1	3	1
chr8	61854658	61877087	CHD7	13	11	1	8	2
chr8	72052253	72089052	EYA1	17	12	0	6	0
chr8	103731492	103743697	KLF10	4	5	0	3	0
chr8	103799036	103821535	AZIN1	11	13	0	5	0
chr8	127384854	127392728	.	8	4	6	3	1
chr8	129951387	130018403	.	14	15	18	17	2
chr8	139573229	139579829	.	4	4	4	1	1
chr8	145013929	145045550	PLEC	2	6	0	1	0
chr9	995994	1033871	DMRT2	15	9	15	9	1
chr9	1525870	1538764	DMRT2	6	4	10	5	1
chr9	14298584	14323311	NFIB	10	13	1	6	0
chr9	16100239	16153879	CCDC171	16	9	2	8	2
chr9	35510613	35521878	RUSC2	8	8	1	3	0
chr9	36148400	36166623	GLIPR2	7	6	1	2	0
chr9	37667778	37694259	FRMPD1	10	9	5	3	1
chr9	37953896	38080307	SHB	27	26	20	23	5
chr9	38226263	38233558	SHB	5	5	6	2	3
chr9	38363321	38389706	ALDH1B1	7	10	0	7	2
chr9	38412424	38424790	IGFBPL1	9	7	3	3	1
chr9	38668907	38694839	ANKRD18A	12	9	11	10	5
chr9	73022241	73036533	KLF9	6	8	0	1	0
chr9	79271609	79319983	GCNT1	13	11	2	1	0
chr9	84434665	84444478	TLE1	9	7	2	4	1
chr9	86777970	86798679	RMI1	8	4	0	3	1
chr9	89049263	89257947	GAS1	24	22	30	34	2
chr9	89507069	89521271	GAS1	5	3	5	2	3
chr9	89536166	89559096	GAS1	3	2	2	7	1
chr9	89870098	89900760	GAS1	12	9	11	8	0
chr9	90186037	90240543	DAPK1	9	10	13	10	2
chr9	90830190	90858766	SPIN1	5	4	1	2	1
chr9	92271984	92300827	.	5	6	1	4	2
chr9	92443415	92461756	.	9	7	5	5	2
chr9	92757750	92782672	.	7	11	8	5	2
chr9	97533787	97567745	C9orf3	7	4	3	8	0
chr9	97609517	97641416	C9orf3	7	10	8	7	1
chr9	97852608	97864584	FANCC	5	6	3	5	0
chr9	101544515	101559313	ANKS6	6	4	2	4	2
chr9	110492235	110519264	KLF4	15	12	5	3	1
chr9	111032220	111037248	IKBKAP	1	1	4	2	1
chr9	114687685	114736948	UGCG	6	7	15	8	1
chr9	114797559	114838284	SUSD1	15	16	18	6	1
chr9	116329743	116398508	RGS3	21	23	19	15	2
chr9	116747863	116756845	ZNF618	1	2	2	1	0
chr9	117877513	117933507	TNC	22	18	24	7	3
chr9	127004519	127069127	NEK6	17	17	17	8	3
chr9	127082923	127106394	NEK6	6	8	3	4	0
chr9	127533631	127603822	OLFML2A	13	19	13	11	0
chr9	131901176	131910001	PPP2R4	6	6	0	2	0
chr9	132878367	132892473	GPR107	9	9	6	4	2
chr9	133063002	133071232	.	3	5	2	4	1
chr9	133340958	133360937	ASS1	9	9	3	5	2
chr9	133543872	133549795	PRDM12	2	1	0	1	1
chr9	133698795	133746859	ABL1	14	11	4	5	0
chr9	134482988	134511655	RAPGEF1	14	14	13	9	2
chr9	134605713	134614911	RAPGEF1	10	9	10	3	1
chr9	134865800	134903028	MED27	7	5	41	9	3
chr9	136007512	136020637	RALGDS	2	3	0	2	0
chr9	136566031	136581986	TMEM8C	6	8	1	1	0
chrX	39945196	39969368	BCOR	1	5	0	0	0
chrX	110590671	110621398	DCX	5	5	0	5	2
chrX	133704415	133741984	HPRT1	7	6	0	8	2
chrX	133754545	133781757	FAM122B	5	2	3	3	2
chrX	133866587	133887566	FAM122B	7	7	0	7	0

## Sheet: Fig.4 - fig. supp. 3C
HDAC2 ChIP-seq
Data is represented as fold change over negative control
	ALK1		CDH3		ASS1		UNTR5
shScramble +Dox	7.32707	2.22586	10.0989	4.31348	9.56724	3.4178	1.94005	0.899738
shCHD4 +Dox	3.90535	1.98014	6.68354	4.00032	9.21331	4.59277	0.877229	1.28274
