# Supplementary material for: NuRD subunit CHD4 regulates super-enhancer accessibility in rhabdomyosarcoma and represents a general tumor dependency
Source: eLife journal article supplement (doi:10.7554/elife.54993), 2020-08-03
Supplement: supp [file elife-54993-supp-v1.zip › elife_poa_e54993_Figure_5_figure_supplement_1.pdf]

## Figure 5 - figure supplement 1

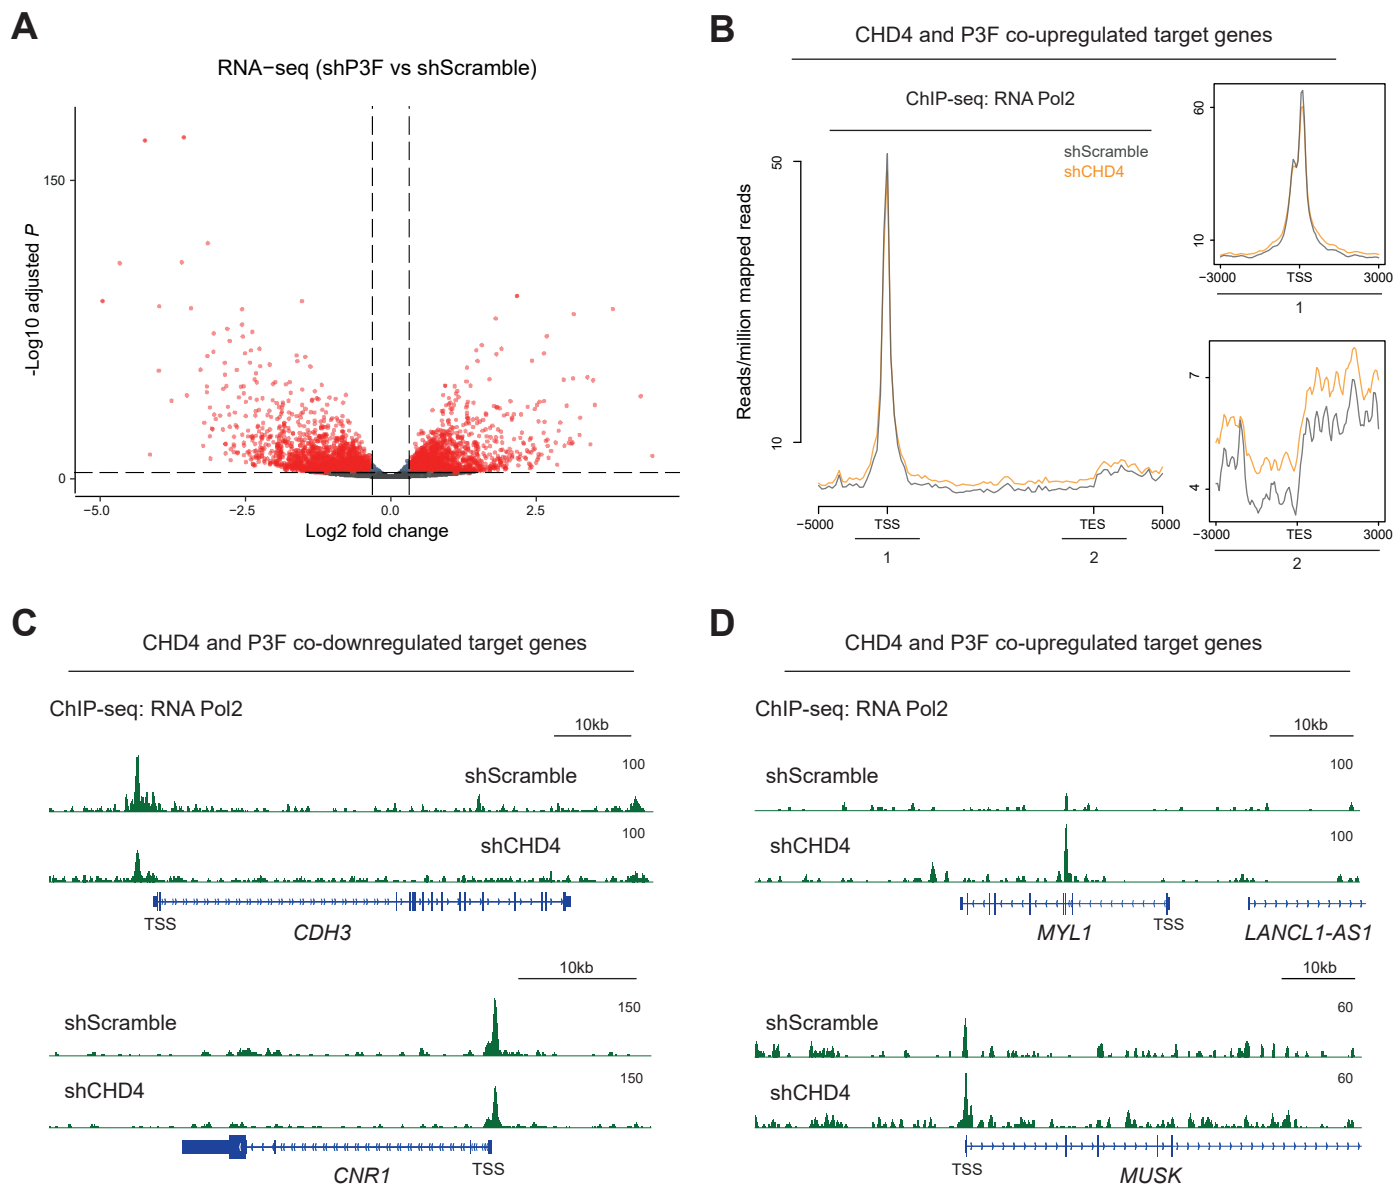

**Figure 5 - figure supplement 1** RNA Pol 2 positioning is affected by CHD4 silencing. **A** Volcano plot depicting changes in gene expression after 48hrs of P3F silencing in RH4 cells (fold change  $\geq 25\%$ , false discovery rate of 1%). **B** Density plots depicting the average RNA Pol 2 ChIP-seq signal upon 48hrs of CHD4 silencing (orange) at genes co-upregulated by P3F and CHD4 ( $n=541$ ). **C and D** Gene tracks depicting changes in RNA Pol 2 binding after 48hrs of CHD4 silencing at promoters of genes co-down (**C**) or co-upregulated (**D**) by CHD4 and P3F.
