# Supplementary material for: NuRD subunit CHD4 regulates super-enhancer accessibility in rhabdomyosarcoma and represents a general tumor dependency
Source: eLife journal article supplement (doi:10.7554/elife.54993), 2020-08-03
Supplement: supp [file elife-54993-supp-v1.zip › elife_poa_e54993_Figure_5_Source_data_1.xlsx]

## Sheet: Fig.5 C and D
CHD4 and PAX3-FOXO1 co-regulated target genes.
List of differentially expressed genes upon 48hrs of CHD4 and PAX3-FOXO1 knockdown.
Downregulated genes
Gene name	CHD4 - Fold change (Log2)	PAX3-FOXO1 - Fold change (Log2)
MAGEA11	-3.88018	-4.13192
GABRQ	-3.41301	-3.21815
UGT2B4	-2.89869	-2.23521
ATP9A	-2.88728	-2.26281
BTBD11	-2.51252	-2.52071
KANK4	-2.49594	-0.413908
ARHGAP8	-2.41627	-0.783472
C6	-2.36659	-0.957596
RAB39B	-2.23422	-0.886215
SLC35F2	-2.2295	-0.69538
SBK2	-2.22829	-1.9465
NLGN4X	-2.11424	-1.6487
ISOC1	-2.10731	-0.535452
SHISA6	-2.03255	-2.21251
TEK	-2.00648	-1.08426
HCN4	-2.00062	-2.26456
PLPP4	-1.96656	-0.786196
FJX1	-1.9447	-0.693554
TMEM156	-1.92529	-2.323
C1orf94	-1.86629	-2.83482
RBM11	-1.84521	-1.01532
JPT2	-1.83564	-0.382316
PRKAA2	-1.80744	-1.95623
RTL9	-1.78701	-0.731348
UHMK1	-1.78202	-1.52178
IMPG1	-1.77481	-2.3042
NRK	-1.77311	-1.9513
MGAT5B	-1.75454	-0.599261
SLC24A4	-1.72296	-2.37466
CDH3	-1.71974	-1.82166
TRIM21	-1.71278	-1.93393
FRG2	-1.7027	-2.69133
PRR5-ARHGAP8	-1.6802	-0.371058
FRG2B	-1.67371	-2.83732
CDH19	-1.67351	-1.6286
CENPVL3	-1.67014	-1.87014
TMEM56	-1.64549	-0.506642
MACROD2	-1.63751	-2.23694
NAT8L	-1.63251	-0.929472
FGF21	-1.57862	-1.30513
CCDC78	-1.57436	-1.37248
EPB41L4B	-1.5692	-2.76316
S1PR3	-1.56891	-1.38976
OR2W3	-1.56195	-1.39297
TMEM171	-1.55328	-1.81535
ADAMTSL5	-1.54038	-1.0631
CCKBR	-1.5294	-1.16223
OR6F1	-1.51648	-2.41089
GPR39	-1.4986	-1.12495
EPAS1	-1.49015	-1.15535
NPAS2	-1.48059	-1.47321
RSPO2	-1.47956	-1.34315
SKOR1	-1.47824	-0.726532
SHISAL1	-1.47548	-1.09264
FAM167A	-1.4752	-1.37549
TRPM8	-1.47486	-1.53416
TRIM58	-1.47227	-1.40837
TMEM56-RWDD3	-1.445	-0.471108
SH3TC2	-1.44441	-1.35651
MAGEA6	-1.4324	-0.575506
AC118470.1	-1.41628	-2.31491
LY6E	-1.41269	-1.55475
PLXNA4	-1.41079	-2.44875
SLC9A7	-1.38486	-0.789311
CLSTN2	-1.36673	-0.989181
TMC7	-1.36655	-1.59778
RCC2	-1.35802	-1.02309
OR14K1	-1.35308	-1.38988
TRPV4	-1.35275	-1.91125
USP46	-1.34651	-0.805511
GPR27	-1.34047	-0.902241
ZDHHC23	-1.34046	-1.74964
OLFM1	-1.33623	-1.14609
SPTBN5	-1.33613	-2.26353
TMEM132D	-1.33389	-0.628347
B4GALT6	-1.32198	-1.22018
GDF10	-1.30148	-2.5217
CRACR2A	-1.29	-0.962885
SCUBE1	-1.28005	-0.860923
PTGIS	-1.27179	-1.20197
LIFR	-1.26883	-1.34747
CENPVL2	-1.26286	-1.64917
OR14A2	-1.24918	-2.22286
DYSF	-1.24789	-0.742484
TRIM5	-1.22183	-0.87865
IL1RAPL2	-1.21412	-1.26693
TESC	-1.21305	-1.1367
UGT3A1	-1.21179	-2.0198
ADAMTS3	-1.196	-1.18812
AC139491.7	-1.18677	-1.56698
SYT11	-1.18176	-0.466701
VRK2	-1.18059	-0.559075
ARL4C	-1.18003	-0.654364
SLC4A8	-1.17893	-0.456278
FAM153C	-1.17363	-1.2768
PITPNM2	-1.17154	-1.11583
PRMT6	-1.17131	-0.691405
FAM153B	-1.17042	-1.44325
DACT1	-1.15189	-0.635821
CHRNA9	-1.14845	-0.685599
LYNX1-SLURP2	-1.13477	-0.767607
CSMD2	-1.13066	-1.93097
MAGEA3	-1.12466	-0.547464
STATH	-1.11906	-3.97838
PTPA	-1.11664	-0.800613
GRM7	-1.1057	-0.739252
VANGL1	-1.09966	-1.30596
LHX4	-1.09047	-2.84539
C6orf15	-1.0769	-1.1598
FAXC	-1.07666	-1.74737
HEBP2	-1.06673	-0.812136
RHOBTB1	-1.06185	-0.355886
TAP1	-1.0585	-1.62545
CELSR3	-1.05804	-0.40913
FUT5	-1.05762	-1.80228
ARMC4	-1.05742	-0.659536
AC104389.4	-1.05588	-0.744529
ALK	-1.04979	-0.578761
CEND1	-1.04112	-0.706228
RNF180	-1.03518	-0.902648
SORBS1	-1.03339	-2.07905
AP1M1	-1.02828	-0.343124
WTIP	-1.02817	-0.568852
RCAN3	-1.02542	-0.616327
GRIK1	-1.0229	-1.24875
CACNB2	-1.02188	-1.6085
MBOAT1	-1.0201	-0.888525
LONRF1	-1.01916	-1.05211
SH3BGRL3	-1.01687	-1.5489
LTBP1	-1.01122	-1.1006
ARNT2	-1.0075	-1.37045
BMP7	-1.00299	-0.886772
ABCC1	-1.00261	-0.969175
MELTF	-0.99801	-0.821865
LRRC3	-0.98737	-0.839377
ST3GAL6	-0.98352	-1.8293
FAM153A	-0.98	-1.73947
TTYH2	-0.97729	-0.541762
ARMCX2	-0.97663	-0.502524
SV2A	-0.97576	-0.722738
PRELID3A	-0.97437	-0.720334
NEFL	-0.97396	-2.06589
ZNF365	-0.9704	-1.22337
ADGB	-0.96935	-0.944817
DOCK8	-0.96899	-0.722071
CELSR1	-0.96786	-0.401684
ATF5	-0.96188	-0.795378
SH3BP5	-0.95542	-0.559584
PLEKHB1	-0.94709	-0.866394
DMRT2	-0.9439	-1.13844
MEDAG	-0.94051	-2.82025
C4orf46	-0.93674	-0.551646
MME	-0.9249	-0.892286
HGSNAT	-0.92285	-0.483516
CYFIP1	-0.92053	-0.39655
PNO1	-0.91255	-0.441041
PPFIBP2	-0.91237	-1.74703
CTXN1	-0.91229	-0.907241
GTF3A	-0.91147	-0.881981
SINHCAF	-0.90004	-0.367352
MTUS2	-0.89872	-1.7461
MAGEA2B	-0.89127	-0.750389
SYT3	-0.88842	-1.35535
GPAT3	-0.8876	-0.857572
STRA6	-0.88743	-0.937165
SORD	-0.8858	-0.478056
IQGAP2	-0.88089	-1.49226
MAGEA2	-0.88055	-0.697739
FUT3	-0.87896	-1.83522
ALDH1B1	-0.8761	-0.839257
TMBIM6	-0.86428	-0.702352
PTBP3	-0.86209	-0.640188
MCIDAS	-0.85793	-0.717493
CD55	-0.85704	-1.33529
AK3	-0.85266	-0.646581
CFAP97	-0.84551	-0.466093
MYLK3	-0.84259	-0.644396
APC2	-0.83888	-0.479033
LMO2	-0.83827	-1.05719
RGS19	-0.83823	-0.954108
FLNB	-0.83709	-0.887412
AXIN2	-0.83687	-0.674219
SDC1	-0.83003	-0.465044
PPP2R2C	-0.82901	-0.758841
NFASC	-0.82716	-2.57376
EYA2	-0.82565	-0.438141
CNR1	-0.825	-3.58371
NPTX2	-0.81864	-0.544671
RHBDL3	-0.81131	-0.595231
TENM3	-0.81096	-1.10892
SEMA4F	-0.80946	-0.54069
CMTM6	-0.80584	-0.445386
FZD10	-0.80232	-1.69522
MDGA1	-0.80185	-1.42296
CLVS2	-0.80165	-1.20619
GAS1	-0.80144	-0.579265
CTDSPL	-0.79719	-0.500374
PLPPR3	-0.79338	-0.945297
MTUS1	-0.79256	-1.15932
GJB2	-0.78999	-1.45118
CDKL1	-0.78846	-0.425273
SPOCK2	-0.78769	-0.584498
ANKRD1	-0.78205	-0.677489
MATK	-0.78095	-1.41467
BEND4	-0.7791	-0.760718
EEF1A2	-0.77852	-1.30228
PLAGL1	-0.77388	-0.473022
EFR3B	-0.77292	-0.655348
CAV3	-0.7692	-0.548921
ZEB1	-0.76825	-0.361955
ANK1	-0.76111	-1.05557
PFKL	-0.75608	-0.392687
TFAP2A	-0.75128	-0.717279
TMEM177	-0.75069	-0.394515
MMP16	-0.74879	-2.02002
UST	-0.74494	-0.512993
OIP5	-0.73894	-0.431974
LTK	-0.73757	-0.906907
BCL2L1	-0.73614	-0.696758
RAPGEF1	-0.72853	-0.826785
SLC35D1	-0.72758	-0.717528
PTPRT	-0.7259	-0.736685
VPS72	-0.72068	-0.469852
FAM124A	-0.71579	-0.517022
CDC37	-0.71497	-0.43848
ZNF260	-0.71469	-0.63946
PUS7	-0.71443	-0.357864
PPP2R3A	-0.70975	-0.491545
DOCK3	-0.70953	-1.37175
FOXF1	-0.7088	-2.87519
NAF1	-0.70712	-0.373025
SSTR5	-0.70441	-2.92684
SURF6	-0.70124	-0.553401
EPHA5	-0.69937	-1.90791
HES7	-0.69467	-1.38287
NAP1L3	-0.69396	-0.60397
DUSP8	-0.69377	-1.28202
IMPA2	-0.68965	-0.789974
SMARCE1	-0.68767	-0.342102
ATP8B4	-0.6871	-0.97305
POLR3G	-0.68618	-0.365853
SLC19A1	-0.68483	-0.421
PTMA	-0.68325	-1.1081
SCN4A	-0.68215	-2.0707
RNF138	-0.68205	-1.09147
PDE12	-0.67442	-0.342166
EFNA2	-0.67377	-0.676308
CTNND2	-0.67254	-1.47124
PNP	-0.67036	-0.452694
AMPD3	-0.66943	-1.85039
SPR	-0.66816	-0.555584
GATA4	-0.662	-1.00657
NECAB2	-0.65845	-0.951873
SPIN2B	-0.6574	-0.356785
PCDHB12	-0.65425	-0.500847
PDGFD	-0.65227	-1.08372
MYBPC2	-0.65178	-1.6757
RBPJ	-0.65101	-0.818903
ACBD5	-0.64666	-0.381215
FGFR3	-0.64476	-0.726029
THEMIS2	-0.6398	-0.544601
EPHA6	-0.6376	-1.29577
TNNT1	-0.63554	-1.21417
MAN2A2	-0.62888	-0.556739
TBCD	-0.62886	-0.371999
GINS4	-0.62721	-0.345714
DDX21	-0.62206	-0.524461
NKAIN1	-0.62169	-1.3281
TAP2	-0.62116	-1.14644
ITGA6	-0.61937	-1.30043
FLVCR2	-0.6187	-0.603245
SLC25A15	-0.61823	-0.428134
DHCR7	-0.61567	-0.908986
ME2	-0.61557	-0.664586
GNAQ	-0.6128	-0.438885
AP3M2	-0.61091	-0.492649
DCTD	-0.6074	-0.440089
CNOT11	-0.60658	-0.334666
HS1BP3	-0.6038	-1.01014
ACVR2B	-0.60302	-1.16236
AL669918.1	-0.60285	-1.12525
NDUFAF1	-0.60077	-0.348468
PITX1	-0.59963	-0.509069
BRD3	-0.59579	-0.822369
ITPKA	-0.59303	-1.253
SORBS3	-0.5919	-0.399695
BRI3BP	-0.5892	-1.00865
DDIAS	-0.58721	-0.543664
SMPDL3A	-0.58641	-0.708507
SRD5A3	-0.58542	-0.668064
ADAR	-0.58453	-0.426343
RNF44	-0.58153	-0.409815
DYNLT1	-0.58013	-0.403662
RAB32	-0.57574	-0.522043
CNDP2	-0.57216	-0.416167
VDAC1	-0.56768	-0.453977
ADCY5	-0.56646	-0.910979
GOLM1	-0.56164	-0.556085
GLI2	-0.5599	-0.83319
CHST2	-0.55817	-0.817262
NDUFB6	-0.55684	-0.457486
UBL7	-0.55522	-0.353684
IGSF9	-0.55382	-1.81026
KIF3B	-0.55329	-1.46545
SRRM3	-0.55021	-0.412629
APBA2	-0.54701	-0.487166
EMP3	-0.54699	-0.662297
MAPKBP1	-0.54348	-0.626585
CHST9	-0.54179	-1.86674
SLC25A53	-0.53489	-0.502763
EYA1	-0.534	-0.410954
NCS1	-0.53285	-0.508259
GALC	-0.52962	-1.17556
SSUH2	-0.52766	-0.787165
MRRF	-0.52734	-0.376327
MSANTD3	-0.52694	-0.744937
SSU72	-0.52191	-0.612573
HELB	-0.52075	-0.5757
ZNF484	-0.5204	-0.521545
SEPHS1	-0.52031	-0.416932
OTUD3	-0.52019	-0.921328
KCNJ11	-0.51779	-1.04771
PEX5	-0.51722	-0.380012
SERPINB6	-0.51666	-0.455405
GPRIN1	-0.51514	-0.670999
INPP5A	-0.51446	-0.473555
MID1IP1	-0.51377	-0.498356
LZTS3	-0.51208	-0.723104
PGAP3	-0.50804	-0.50641
ADPRHL1	-0.50735	-1.07147
THG1L	-0.50544	-0.324962
FKBP4	-0.50516	-0.477129
PAQR6	-0.50464	-0.677089
PSMB2	-0.50441	-0.458796
B4GALNT4	-0.50423	-1.07466
MB21D2	-0.50396	-0.490891
ARHGEF3	-0.50168	-0.824299
TNFAIP8L1	-0.49753	-0.700355
DOP1B	-0.49716	-0.709781
POLE3	-0.49634	-0.541185
NR2F6	-0.49583	-0.646186
CAP1	-0.49407	-0.34398
TRIM2	-0.49381	-0.467108
MTMR7	-0.48452	-1.86433
ANKRD13A	-0.48238	-0.596349
TMEM240	-0.48055	-1.22404
SMAD1	-0.47869	-0.869087
ZMYND19	-0.47855	-0.351734
UCK2	-0.47749	-0.398567
ACOT9	-0.47535	-0.822554
TIMM10B	-0.47444	-0.710108
FCRLB	-0.47438	-1.49201
RNF20	-0.4736	-0.381581
PDCD2	-0.47127	-0.663953
UBASH3B	-0.46701	-1.15498
FOXF2	-0.46654	-0.914538
SRSF9	-0.46654	-0.671161
CS	-0.46606	-0.347305
CHST10	-0.46478	-0.60434
ATXN7L2	-0.46467	-0.549923
GAREM1	-0.46247	-0.480671
TP53BP2	-0.46233	-0.70685
IDH1	-0.46066	-0.797408
PGGHG	-0.4583	-0.414377
ALG2	-0.45695	-0.390565
CSRP1	-0.45212	-0.594741
WNK3	-0.44795	-0.613419
INPP5E	-0.44684	-0.424769
SKP2	-0.44681	-0.405764
HSPB8	-0.44283	-0.628323
ZPR1	-0.44199	-0.373717
GTF3C4	-0.44176	-0.561246
GLO1	-0.44005	-0.772322
RCC1	-0.43955	-0.504056
AP5B1	-0.43881	-0.453613
SFMBT2	-0.43842	-0.864912
RPL35	-0.43755	-0.536625
BFAR	-0.43645	-0.843772
RGMA	-0.43498	-1.18517
INSR	-0.43312	-0.501113
MDFIC	-0.43301	-0.492427
F2R	-0.43169	-0.743205
AC138969.1	-0.42985	-0.328397
SLC35E2B	-0.42598	-0.508617
C12orf75	-0.42299	-0.461593
RHOBTB2	-0.42173	-0.366279
RNF14	-0.42126	-0.860781
ADAMTS1	-0.41893	-0.377298
FMNL2	-0.41788	-0.467138
PTPN9	-0.41477	-0.402071
PDE10A	-0.41411	-0.60692
MAP3K7	-0.41193	-0.392501
DAPK3	-0.41139	-0.36921
UTP18	-0.4095	-0.82085
PARP4	-0.40883	-0.486152
CHSY1	-0.40731	-0.699188
MT-CO3	-0.40519	-0.409577
SNAPC4	-0.40396	-0.437321
HIC2	-0.40154	-0.517859
TRIM65	-0.40148	-0.652296
DNMT3A	-0.39927	-0.475939
CHCHD6	-0.39874	-0.450064
NRP2	-0.39773	-0.702664
PSMG1	-0.39197	-0.46389
CHD1L	-0.39113	-0.664214
IST1	-0.39	-0.410264
GATA6	-0.3877	-0.604144
NLGN2	-0.3869	-0.341263
DIS3L	-0.38451	-0.82426
P3H2	-0.38117	-1.1888
TYRO3	-0.37945	-0.422809
ASB1	-0.37927	-0.322688
PARP1	-0.37917	-0.726206
FXYD6	-0.37813	-1.61238
SCARB1	-0.37717	-0.489185
FXYD6-FXYD2	-0.37381	-1.60146
ERLIN2	-0.37296	-0.631369
ASMTL	-0.37246	-0.427757
PCDHB8	-0.36955	-0.341055
GRK6	-0.36955	-0.699588
DAPK1	-0.36898	-0.814019
MAN1C1	-0.36479	-0.442093
TSPAN17	-0.36322	-0.698112
ZNF439	-0.36301	-0.354766
CSTB	-0.36086	-0.764185
APPL2	-0.3604	-0.37216
RPAP1	-0.35894	-0.353664
ATF3	-0.35828	-0.731511
DPYSL2	-0.35697	-0.44838
COG7	-0.35444	-0.350031
EFHD2	-0.352	-0.395801
SHANK3	-0.35099	-0.455952
ZNF300	-0.3502	-0.512026
RFK	-0.34944	-0.381492
MSANTD3-TMEFF1	-0.34824	-0.771218
RPL7A	-0.34658	-0.350127
HAVCR2	-0.34576	-0.884904
PLEKHB2	-0.34478	-0.41104
CPD	-0.34286	-0.539774
INPP4A	-0.34058	-0.36591
METTL26	-0.33932	-0.635569
KIAA1551	-0.33906	-0.449324
SYT17	-0.33863	-0.4147
NUP43	-0.33715	-0.415118
MTX1	-0.33145	-0.417789
IL4R	-0.33082	-0.91736
GRK3	-0.327	-0.352908
KCNN3	-0.32665	-0.546775
GTF2H5	-0.32295	-0.37021
Upregulated genes
Gene name	CHD4 - Fold change (Log2)	P3F - Fold change (Log2)
DNAJB14	0.321977	0.491994
SMAP2	0.322988	0.803043
UQCC1	0.323912	0.591908
UMAD1	0.328021	0.655285
RAP1B	0.330446	0.405385
CD59	0.331609	0.446165
MFSD14B	0.332558	0.404035
MAP3K13	0.332738	0.342937
TSC22D4	0.333288	0.426252
KLHL11	0.334933	0.495564
SLC13A3	0.336111	0.549172
HEATR5B	0.337662	0.371096
CCM2	0.339073	0.336454
ANKRD50	0.339673	0.898734
PSMG2	0.339992	0.784279
DCBLD2	0.343461	0.34768
TMEM65	0.344415	0.510939
CTR9	0.347889	0.704697
MKNK1	0.35046	0.387836
DNAJC1	0.351241	0.397623
KLF10	0.353045	0.702177
MFSD14A	0.353805	0.326277
FAM126B	0.356152	0.757186
TULP3	0.356979	0.698654
RNF2	0.360144	0.398469
EXOSC1	0.361052	0.367501
SEPT8	0.36163	0.510152
DYNLRB1	0.36248	0.425791
VPS53	0.364364	0.489471
NEK1	0.366628	0.511772
FTO	0.367415	0.416845
GNS	0.369532	0.402178
TGOLN2	0.370659	1.29896
TNIK	0.371312	1.48875
MICALL2	0.373138	0.688886
ZNF772	0.373238	0.583054
COPS7A	0.374505	0.486873
CCDC127	0.375304	0.414431
ZNF805	0.37588	0.541278
TPST2	0.376249	0.533578
WDR44	0.377289	0.516816
DNAH14	0.377646	0.514552
ZDHHC4	0.379988	0.429663
TCEA3	0.381171	0.602657
ASPH	0.381358	0.475828
LIMA1	0.381954	0.769386
EPB41L2	0.382013	0.913013
ADAM17	0.383742	0.411869
MED29	0.388289	0.397552
FAM174A	0.389626	0.494918
GLCCI1	0.39314	0.565806
COL5A1	0.396106	0.755974
SNX15	0.397061	0.563036
MFSD10	0.397142	0.405615
FAM229B	0.397802	0.32941
PLOD2	0.399512	0.574843
IGF2BP3	0.40324	0.42151
KIDINS220	0.403262	0.442404
STX7	0.407068	0.405218
SSH1	0.40745	0.552688
SRGAP2B	0.409032	0.418763
ZNF776	0.409427	0.374937
FYCO1	0.410364	0.356868
WFS1	0.410956	0.384099
ACAD8	0.416442	0.359316
SRGAP2	0.417226	0.402598
AC098650.1	0.421901	0.777167
CDK6	0.422531	0.632005
CAAP1	0.423149	0.378364
VEGFB	0.426277	0.394427
BCORL1	0.426489	0.615182
SRL	0.427621	1.06987
APAF1	0.428607	0.54593
SRGAP2C	0.428818	0.475592
CUTC	0.429817	0.452027
CCDC186	0.431195	0.532564
SMAD3	0.431312	0.62319
NXPH4	0.431976	1.24442
AAGAB	0.432193	0.549213
RHEBL1	0.432492	0.54505
COX7C	0.434671	0.701085
NR1H3	0.435604	0.572882
TESK1	0.436481	0.564345
FOXN3	0.438644	0.615298
FAM111A	0.439171	0.511465
ALCAM	0.440224	0.900971
ARMCX3	0.440917	0.567627
LGMN	0.442797	0.584063
NDUFB11	0.445868	0.870788
ZNF629	0.446303	0.344874
ZRANB3	0.447988	0.404301
LRCH1	0.451433	1.13224
ABHD16A	0.45452	0.326488
AL662899.1	0.455277	0.327768
CHD9	0.455448	0.428957
CEP350	0.456148	0.356978
PSAP	0.457472	0.357559
NEDD4L	0.458905	0.515584
MUM1L1	0.459488	0.527189
TTC28	0.459539	0.539831
FCHSD2	0.459707	0.505438
PHC3	0.460339	0.463608
ZBTB22	0.463555	0.401061
KIRREL1	0.463644	0.852685
ST8SIA1	0.464746	0.977784
TMED8	0.465069	0.407431
SDCBP	0.466229	0.7364
LDAH	0.46642	0.456125
ELFN1	0.467706	0.677302
PLXNA3	0.468523	0.325513
TSPO	0.470133	0.86754
FRMD4B	0.470611	0.452338
MYO10	0.472247	1.89956
KLF12	0.47232	0.422994
FAM126A	0.473607	0.471268
LHFPL6	0.47508	1.12295
ZDHHC15	0.475106	0.465117
KIAA0513	0.477529	0.483602
GALK2	0.478409	0.338473
HADH	0.478524	0.391208
TCF4	0.478753	0.901101
SEMA6C	0.482836	0.428992
CBFB	0.483045	0.334891
NNT	0.486017	0.857859
CCDC90B	0.48923	1.0858
CDC25B	0.489692	0.893239
ZFPM2	0.490451	0.690302
MLXIP	0.492574	0.40466
C4orf33	0.496111	0.69061
IL1RAP	0.496781	1.1646
ZNF17	0.499043	0.413402
LASP1	0.49986	0.548083
PCYOX1	0.500433	0.421373
TMCC1	0.502447	0.473582
JAG2	0.503376	1.01722
DNAJC10	0.504908	0.361947
PCCA	0.50523	0.511447
SIPA1L2	0.505264	0.328435
FRMD6	0.505754	0.659698
AC093323.1	0.505854	0.427654
DNAJC3	0.506843	0.568746
CREB3L2	0.50738	0.669045
KCTD20	0.508675	0.424639
PDK3	0.514292	0.340011
RDH10	0.515103	0.586929
TAGLN3	0.515438	0.35172
NSMCE2	0.517607	0.489323
SLAIN1	0.51878	0.483539
MITF	0.520247	0.490976
SH3RF3	0.521272	1.12734
REEP1	0.521876	0.868262
AC004076.1	0.522366	0.535405
WDR1	0.523007	0.730575
ZC2HC1A	0.524086	0.868186
HLA-A	0.525879	1.05839
CBR4	0.528478	0.734679
CCNYL1	0.528665	0.717473
TEF	0.528973	0.608357
C6orf106	0.531652	0.748842
ZHX2	0.532455	0.392346
ITFG1	0.534106	0.335868
BCL9L	0.53491	0.556274
PTPRA	0.537682	0.413598
C12orf49	0.540358	0.47176
TNFRSF19	0.542253	1.11617
STK17B	0.543533	0.448194
CPS1	0.545	0.32688
FAM222B	0.547337	0.366166
CECR2	0.548143	0.378306
SDCCAG8	0.549391	0.55893
ARID4A	0.551813	0.414235
FNDC3A	0.556968	0.371183
EFCAB2	0.557134	0.525189
AL031281.2	0.559556	0.876549
DDB2	0.560016	0.545551
GRINA	0.560263	0.388524
SGPL1	0.560278	0.624661
CLCN3	0.561409	0.690326
TRIM55	0.563019	0.387057
CLTC	0.563428	0.870219
CSNK1G1	0.563874	0.73361
AHDC1	0.566932	0.326376
KANK1	0.567501	0.667206
HSPB2-C11orf52	0.570481	1.4653
AL358075.4	0.571325	0.382261
FRMPD1	0.572958	1.01245
KANSL1L	0.576915	0.815287
GTF2A1	0.577027	1.05533
GALM	0.582732	0.80702
TOB2	0.585367	0.992823
DCHS1	0.587245	0.530008
SH2D3C	0.588948	2.51365
FN1	0.592328	0.975148
USP53	0.594498	0.448094
KBTBD2	0.596777	0.351076
GFM2	0.59683	0.539488
COL16A1	0.597697	0.588619
PKHD1	0.59819	1.14979
TBPL1	0.598238	0.904948
FMO4	0.598354	0.50104
CDC42	0.59842	0.915159
ATXN1	0.60016	0.499317
MAPK1	0.600576	0.590025
SKAP2	0.600625	0.492605
MUL1	0.602431	0.529951
LPAR4	0.603549	0.872456
CHAC2	0.605593	0.629968
PLPP7	0.605606	0.591379
C12orf60	0.605634	0.534252
IFFO1	0.605715	0.540424
FOXO4	0.60981	1.14501
CDH23	0.613413	0.549086
REPS2	0.615797	0.70515
TMEM30A	0.616492	0.325355
G3BP2	0.616849	0.569232
BLZF1	0.617769	0.716301
ASXL2	0.618372	0.553515
NECAP1	0.618564	0.932296
INTS14	0.618668	0.612457
PEX11B	0.619477	0.408992
GSN	0.620159	0.55657
IMPA1	0.623158	0.435814
ABCA3	0.623373	0.568511
LAMB2	0.62499	0.624595
PER2	0.625715	0.492686
CATSPERG	0.626677	0.710399
ATG2B	0.627537	0.623624
ITGB3BP	0.629181	0.54183
CC2D1B	0.630276	0.718473
AC005324.4	0.631775	0.352059
ZDHHC11B	0.633601	0.846612
PNMA2	0.63598	0.855535
CD47	0.637392	0.50164
TNS2	0.64176	0.864807
ATP10D	0.642833	0.39245
FBXO48	0.644157	0.949358
IER5L	0.652141	0.697183
ENTPD7	0.653331	0.522879
SAR1B	0.653553	0.515133
ATG12	0.655805	0.497271
ZNF286A	0.656031	0.360526
GPR78	0.656226	1.23996
CPZ	0.659096	1.24679
ABCC9	0.665569	1.22587
CAMK2D	0.666014	0.999665
GALNT18	0.66643	0.36786
DNAJB5	0.666577	0.539726
CASP8	0.667024	0.708186
PAFAH2	0.668337	0.513085
AGL	0.670749	0.447563
PPP1R21	0.671119	0.482106
CCDC126	0.674903	0.343539
THUMPD2	0.676021	0.564405
COL19A1	0.676103	1.02049
FAM3C	0.676223	0.39152
MBLAC2	0.677161	0.713702
AIG1	0.680364	0.466805
TRDMT1	0.681148	0.47884
CASP3	0.683833	0.630995
LGR4	0.685148	0.984023
PPP1R14C	0.690557	1.25396
OPHN1	0.691968	0.4337
KAZN	0.692294	0.87618
TOM1L2	0.693309	0.760997
MCUB	0.693892	0.351789
WLS	0.694317	0.724428
TBCK	0.697188	0.406213
CDKN1B	0.698025	0.48732
TMEM63A	0.702884	0.530234
DUSP19	0.703125	0.702078
ZNF304	0.705331	0.429169
NCEH1	0.705754	1.21397
AAMDC	0.705932	0.432068
MLLT3	0.706294	0.914497
SLC6A8	0.712541	0.460328
HSPB2	0.714878	1.63049
CD302	0.720394	0.515352
ATP6V0E1	0.720879	0.927916
EFNB1	0.72239	0.913355
BBS9	0.723446	0.385815
AGA	0.7248	0.613846
GDF6	0.727034	4.49017
ANKMY2	0.727442	0.746125
CHCHD7	0.730018	0.781282
NFIA	0.731126	0.420128
MYORG	0.734257	1.0326
VIPR1	0.734474	1.51001
ANKRD31	0.738187	0.51911
EMID1	0.754834	0.707771
PER3	0.7551	0.811805
CXXC5	0.757442	0.372861
PIK3R2	0.760487	0.396052
MAPRE3	0.760634	0.567053
MIDN	0.761617	0.896158
STK35	0.762544	0.821929
PPP1R12B	0.763183	0.673544
C13orf46	0.763954	0.88983
SNCA	0.769263	0.694991
FZD4	0.771082	1.05914
ZSWIM3	0.773345	0.511115
GIT1	0.774605	0.413126
KIFC3	0.775298	0.776905
ZNF385A	0.776042	0.431818
LAMA5	0.776427	1.04948
TPP1	0.777207	0.674029
BACE1	0.777887	1.0968
SYCP2	0.778492	1.00388
TPPP	0.781588	1.71616
ERBB4	0.788051	0.947621
CCDC92	0.788934	0.63749
ETV1	0.789423	0.683266
KLHL7	0.792182	0.456966
AC007192.1	0.792308	0.390381
TBC1D28	0.79342	0.485404
LANCL1	0.796151	0.811628
MMP2	0.796551	0.646795
ZFHX4	0.799441	0.594309
SLITRK5	0.80039	0.941982
PDGFRB	0.812195	3.47304
AP4S1	0.817077	0.650606
SAMD12	0.821283	0.915621
RASD1	0.823597	1.50169
SDC4	0.82673	1.30139
PDLIM5	0.827862	0.950216
GRK4	0.835683	0.384217
SSBP2	0.839785	0.757065
SLC17A5	0.84238	0.507083
HIST1H4L	0.842763	1.56486
PYGM	0.849767	0.718684
TMEM200A	0.849899	1.544
RBMS3	0.85242	1.27969
OAF	0.853244	0.534256
ZIC4	0.855859	0.617995
SLC35G2	0.856823	0.581173
C6orf120	0.860326	0.374319
MYPN	0.860973	2.08094
COG5	0.864385	0.361397
TTN	0.864838	0.991648
PIGN	0.865186	0.639333
PCLO	0.865317	1.09878
GADD45B	0.86855	1.32367
TSC22D3	0.872313	0.663038
CDKN2B	0.875001	1.88703
TNNC2	0.875496	1.73902
PRNP	0.875597	0.819592
CDKN1C	0.876657	0.941997
CDS2	0.880876	0.524918
FAM198B	0.882979	2.67879
FBXO9	0.889439	0.551839
FAT3	0.889954	0.954344
KATNAL2	0.891792	0.671879
MAP3K9	0.892909	0.698985
LAPTM4A	0.894827	1.05126
SULT1A1	0.894832	0.757629
CHN1	0.896053	0.639573
LRIF1	0.896198	0.876708
STUM	0.897261	0.761808
PCDH10	0.903676	0.929251
PEAK1	0.914522	0.792444
SYT1	0.919337	1.6481
PRICKLE2	0.920574	0.61382
C9orf40	0.92408	0.711301
CNTN1	0.926263	0.485168
AL096711.2	0.928916	0.912087
ATP1B1	0.929434	0.935424
ZFP36	0.930945	0.74236
AXL	0.933259	2.04328
TRAPPC9	0.936616	0.558407
PLXDC1	0.938487	1.03088
MGAT4B	0.939643	0.701928
ADAMTSL2	0.950633	1.11473
MGST2	0.952088	0.58597
PDE5A	0.95353	2.11044
OPTN	0.956207	0.749902
TDO2	0.967007	0.810509
AEBP1	0.971292	1.37078
TAOK3	0.973274	0.574572
HERC3	0.975227	0.588352
SSBP3	0.982286	0.572133
PALMD	0.98538	3.13977
PLXNB3	0.994583	1.11313
PREX1	0.999663	0.935695
HSPA4L	1.00145	1.00871
APOL5	1.00183	2.85941
RFTN1	1.0024	0.558329
EFEMP2	1.00251	1.51735
UBE3B	1.00435	0.70747
EPHB3	1.00502	0.375461
KAT2B	1.01001	0.497775
CDKN1A	1.01047	0.44405
CD36	1.0133	1.38795
SESN3	1.01398	0.327347
COL1A1	1.01444	3.81115
ITGA7	1.01752	1.02834
GPC4	1.02352	0.516879
ADAMTS4	1.02907	1.05011
APOE	1.03232	1.12888
PCDH9	1.03338	1.57457
ID2	1.03377	0.769147
LUM	1.03511	2.08496
NAP1L5	1.0388	0.75383
SGCG	1.03884	1.5938
DACT3	1.04039	0.676618
ELL2	1.04975	0.474135
SAMHD1	1.05457	0.556189
ADAMTS2	1.05935	1.04408
NEU1	1.05998	0.694409
GPR155	1.06975	0.858562
TMEM217	1.07206	0.865322
SPAG6	1.09944	3.08267
PLK2	1.10899	1.43055
SYDE1	1.11	0.592858
MUSK	1.1144	1.30735
APBA1	1.11659	1.01349
EGR3	1.11972	1.71758
PLXND1	1.13641	1.47125
MYOM3	1.14111	1.93764
VCAN	1.14769	1.55635
RGS7	1.15462	0.909401
TPM4	1.16019	1.30748
TSPAN9	1.16413	0.467109
MFAP4	1.16734	2.16407
SH2B3	1.17531	0.559648
ZNF727	1.17565	1.99833
LOXL3	1.17926	1.34742
COL4A4	1.18477	0.850217
LGALS8	1.1908	0.377365
FAT4	1.19135	1.94467
FLG	1.19218	1.5696
CRISPLD2	1.19628	2.27324
FRRS1	1.2083	0.885771
SUSD6	1.21062	1.42237
MYBPC1	1.22877	2.04387
ATP13A3	1.23298	0.530143
CMTM3	1.23443	1.01705
IL17B	1.24245	1.83923
ANXA1	1.24473	2.68955
ITPR1	1.25708	0.658183
ACER2	1.25776	0.656794
FAM234B	1.26112	0.851343
FRAS1	1.26367	1.41406
APOBEC2	1.26512	2.04416
PHF21B	1.28317	0.875356
TFEB	1.28865	0.932089
LRRC17	1.30132	1.87211
SPATA9	1.30161	1.37962
GPER1	1.30234	1.04096
SLCO6A1	1.30907	1.83395
WFDC1	1.30968	2.38441
GAB2	1.31743	1.31592
HIVEP2	1.31986	1.46516
CPQ	1.32607	1.06688
MAML2	1.33023	1.50034
LINC00672	1.3346	1.00167
CDH11	1.33919	1.86639
SPOCD1	1.33995	1.96993
ADAM28	1.34804	0.771813
HAP1	1.35114	2.33767
MYOF	1.35418	2.62956
YPEL5	1.36887	0.515191
C2CD2L	1.38907	0.499188
MDGA2	1.40129	0.817085
TP63	1.42085	1.71129
TMEM100	1.43175	2.23781
GDF11	1.4534	0.858674
PLD1	1.47616	2.05633
MARCH9	1.48788	0.601163
ITGA1	1.48952	1.56345
AC019117.3	1.49023	0.89814
STMN3	1.49842	0.783664
TMEM45A	1.50976	0.889094
PHLDA1	1.51498	1.20369
EBF3	1.53133	0.867748
SRPX2	1.53358	1.23452
CD248	1.54077	1.03131
AHR	1.54164	0.797911
ELN	1.55577	2.47035
KIAA0408	1.55699	0.978518
CCDC80	1.56056	0.75752
LY96	1.57638	1.76971
EPS8	1.58239	0.39967
GRIN2D	1.58307	1.46653
TMEM119	1.58626	2.82971
ALDH5A1	1.59306	0.733424
SPRY4	1.6263	1.1064
ANO5	1.63203	1.69857
AK9	1.63234	0.699863
HDAC9	1.63455	0.998097
CETN2	1.63624	1.47983
HR	1.6379	0.646528
CPXM1	1.6661	0.994497
SYNPO2	1.67139	1.32561
FAM13A	1.67317	0.62713
KBTBD12	1.68076	1.32349
NKAIN4	1.68479	0.799138
LAPTM5	1.69864	1.48897
ENG	1.70173	1.97931
ZBTB7B	1.70541	0.454895
AMPD1	1.70857	1.12804
METTL7A	1.73021	0.849063
SEMA3A	1.73115	1.79931
MTSS1	1.73426	1.07487
IGFBP2	1.76013	0.97855
MRLN	1.76019	2.0898
LGALS3BP	1.76589	0.848499
CSRNP3	1.77537	2.30494
MCAM	1.78877	2.16717
FHOD1	1.8153	1.29915
PIFO	1.85813	1.11656
GNG11	1.87892	1.70633
PGM2L1	1.87916	1.32518
MYL1	1.91453	2.69168
EMP1	1.93471	1.88348
ACHE	1.9389	1.48201
TACR3	1.98649	1.01365
FBLIM1	2.00757	1.22902
EGF	2.03483	0.907364
CDK18	2.1024	1.87571
RIMBP2	2.11832	1.3898
MGP	2.15696	0.85042
CACNA1G	2.16185	0.67844
MBP	2.18282	1.00402
MYH8	2.18875	1.10155
ABCD2	2.23748	1.18558
NDST4	2.24765	1.70254
MAP2	2.25239	1.63534
SLC1A3	2.28615	2.5379
CCDC102B	2.33643	2.42291
FAM84A	2.50252	1.08138
IFIT1	2.63121	2.18062
UNC80	2.6584	1.49817
KCNG4	2.69647	1.35798
PCDH15	2.70795	1.31618
PDZRN4	2.7431	0.958636
THSD7A	2.76047	0.915019
TRANK1	2.9802	0.995389
A2M	3.06988	1.33995
SLC2A3	3.09452	1.20607
IFI44	3.11912	3.24955
ADGRF5	3.50698	2.0005
IFI44L	3.88318	2.41018
