# Supplementary figures and images for: NuRD subunit CHD4 regulates super-enhancer accessibility in rhabdomyosarcoma and represents a general tumor dependency
Source: eLife journal article supplement (doi:10.7554/elife.54993), 2020-08-03

**A**

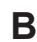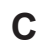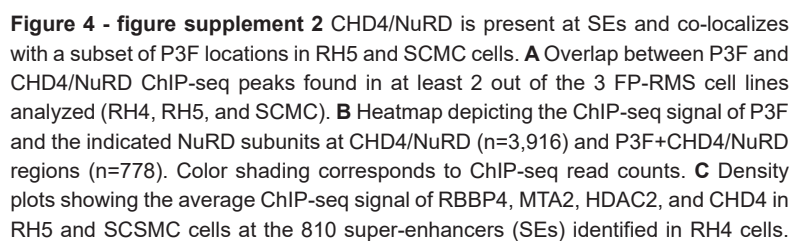

Supplement: supp [file elife-54993-supp-v1.zip › elife_poa_e54993_Figure_4_figure_supplement_2.pdf]
